# Supplementary material for: Comprehensive Identification and Annotation of Cell Type-Specific and Ubiquitous CTCF-Binding Sites in the Human Genome
Source: PLOS journal article supplement (doi:10.1371/journal.pone.0041374), 2012-07-19

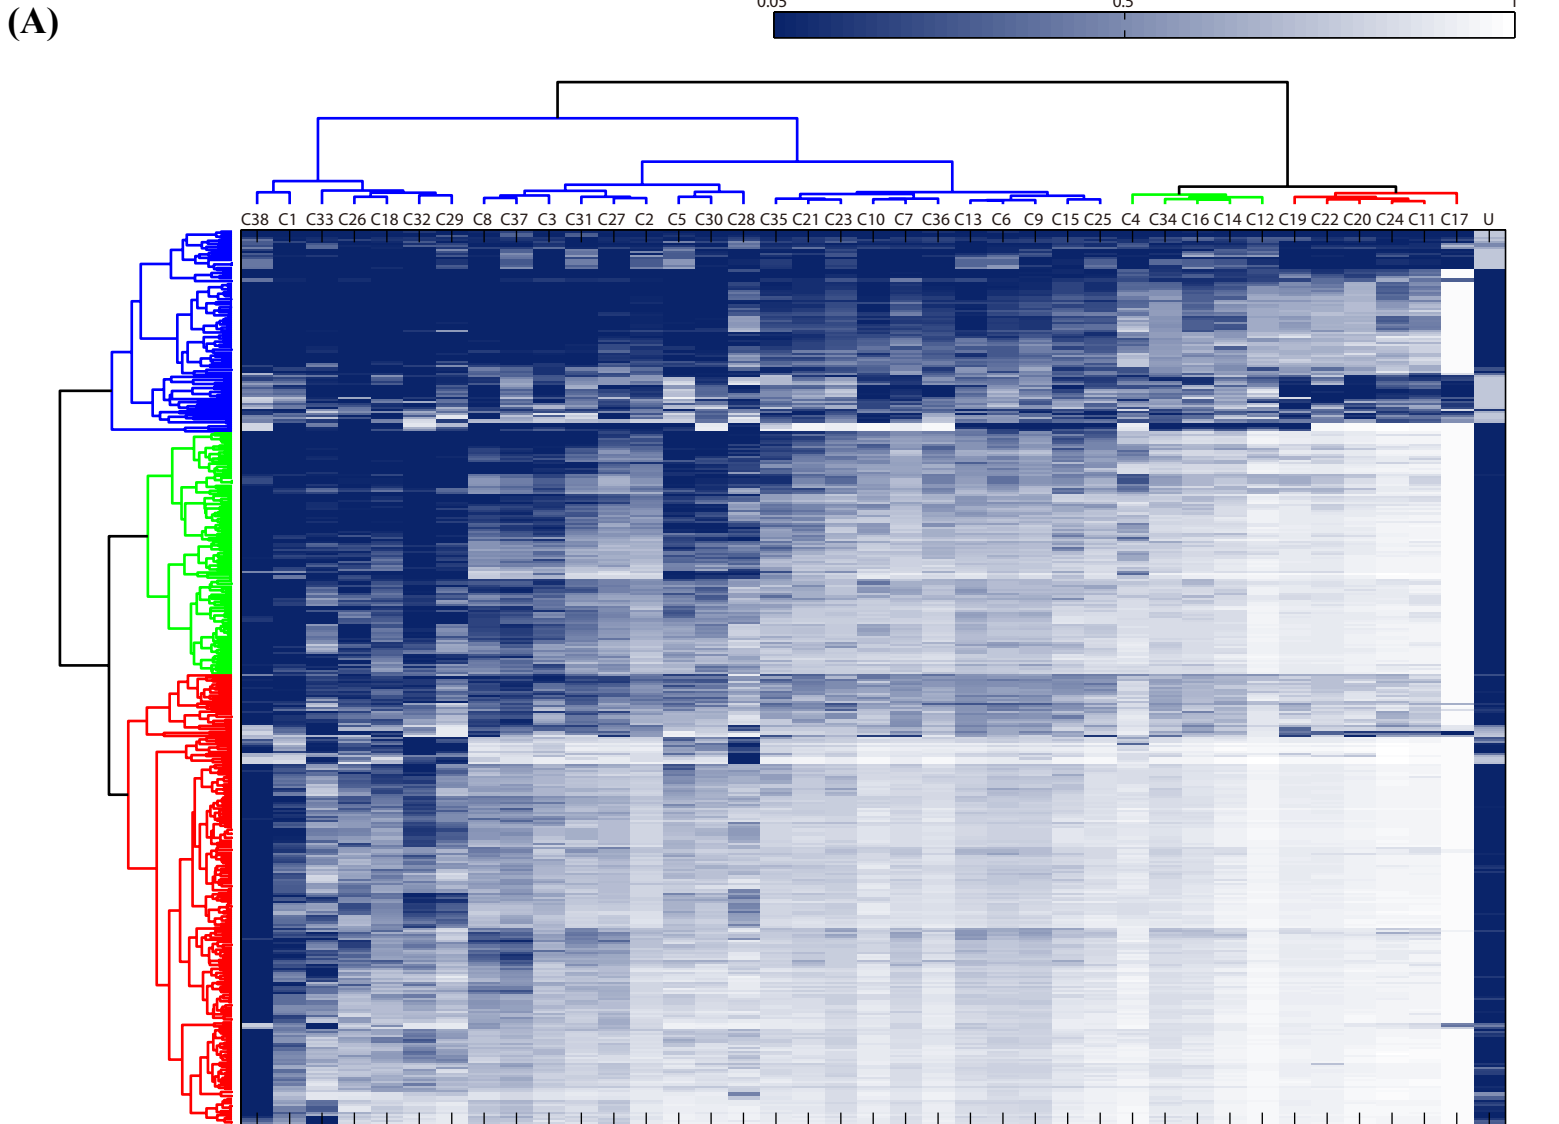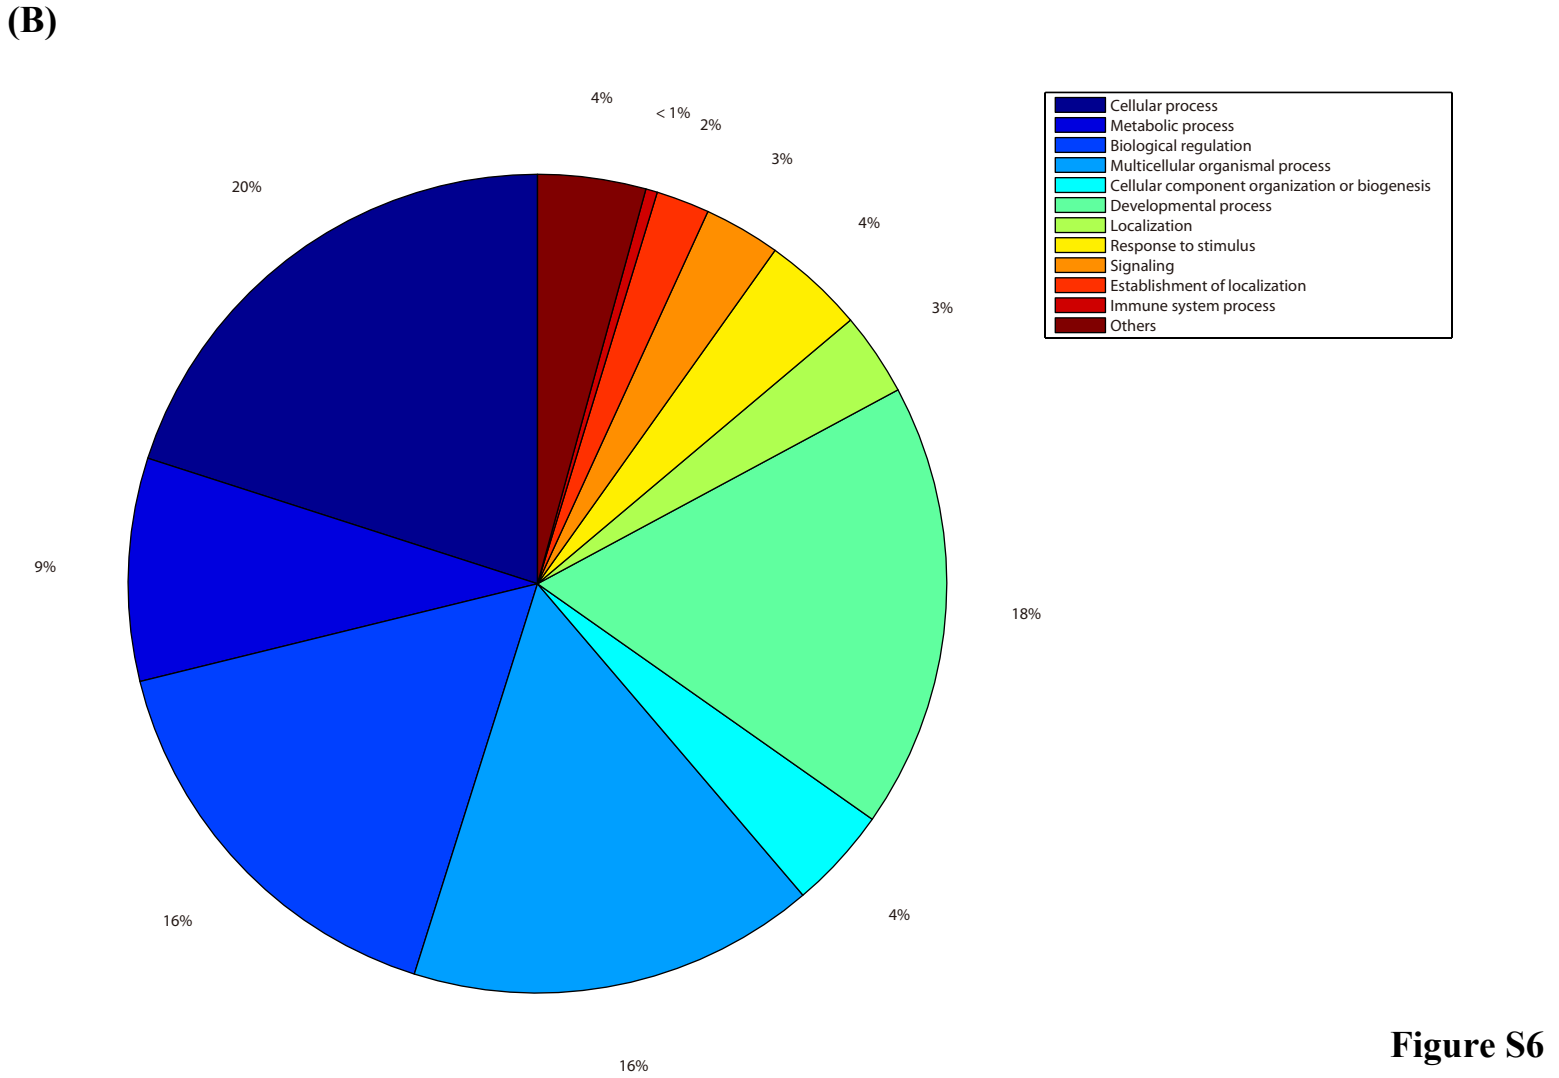

**Figure S6**

(C)

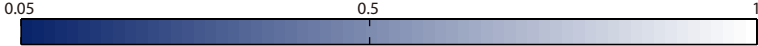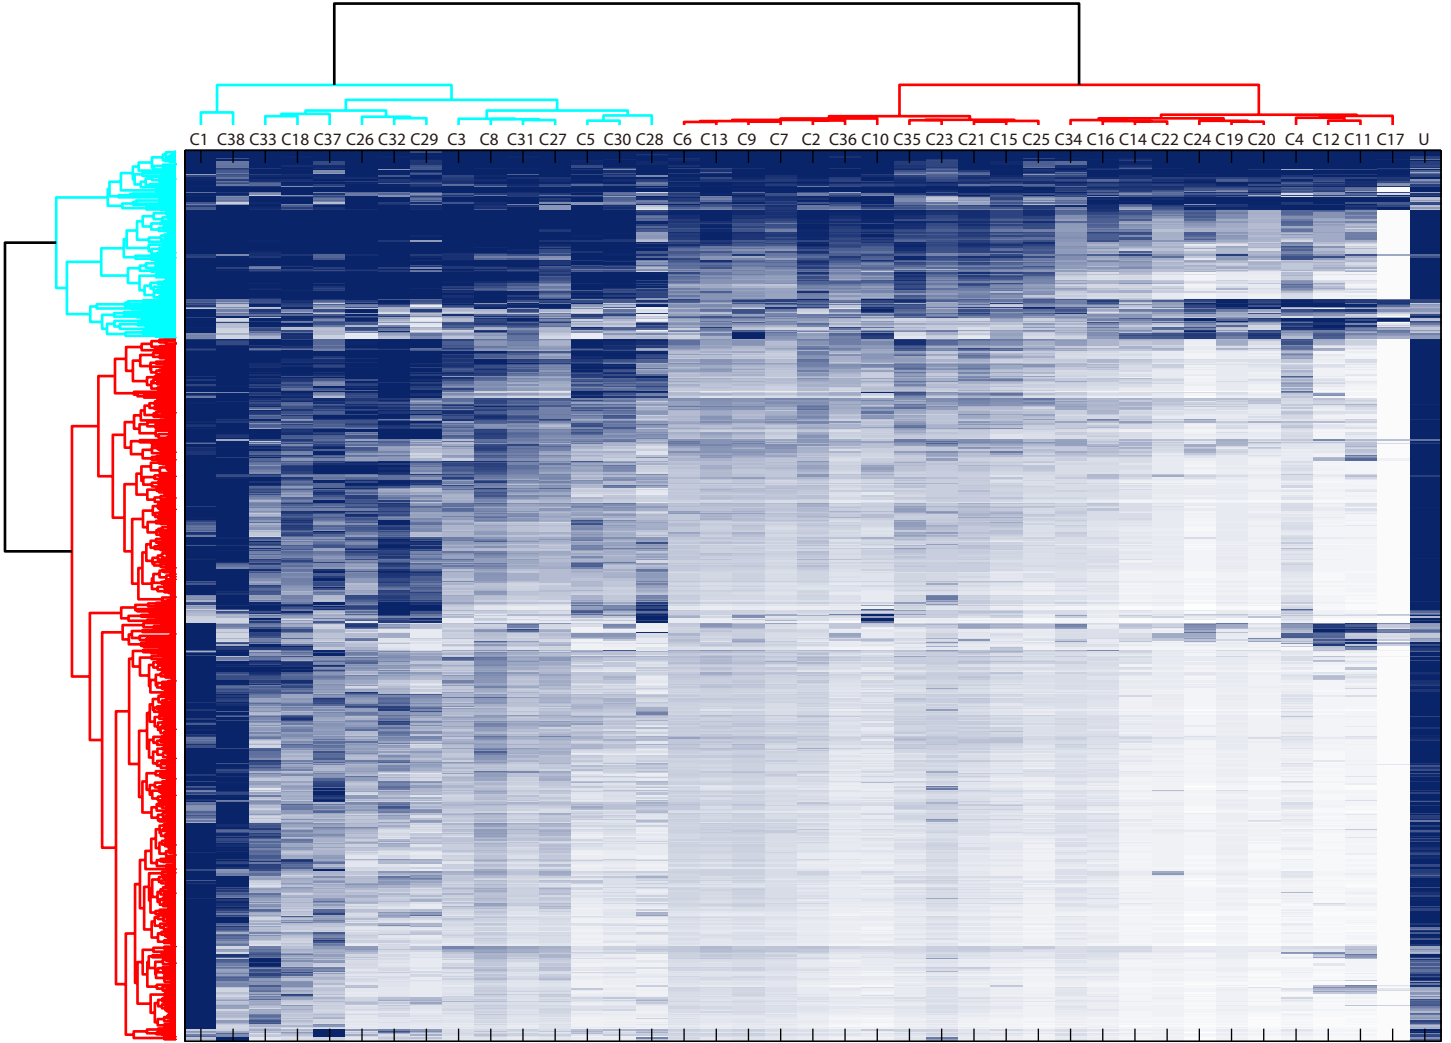

(D)

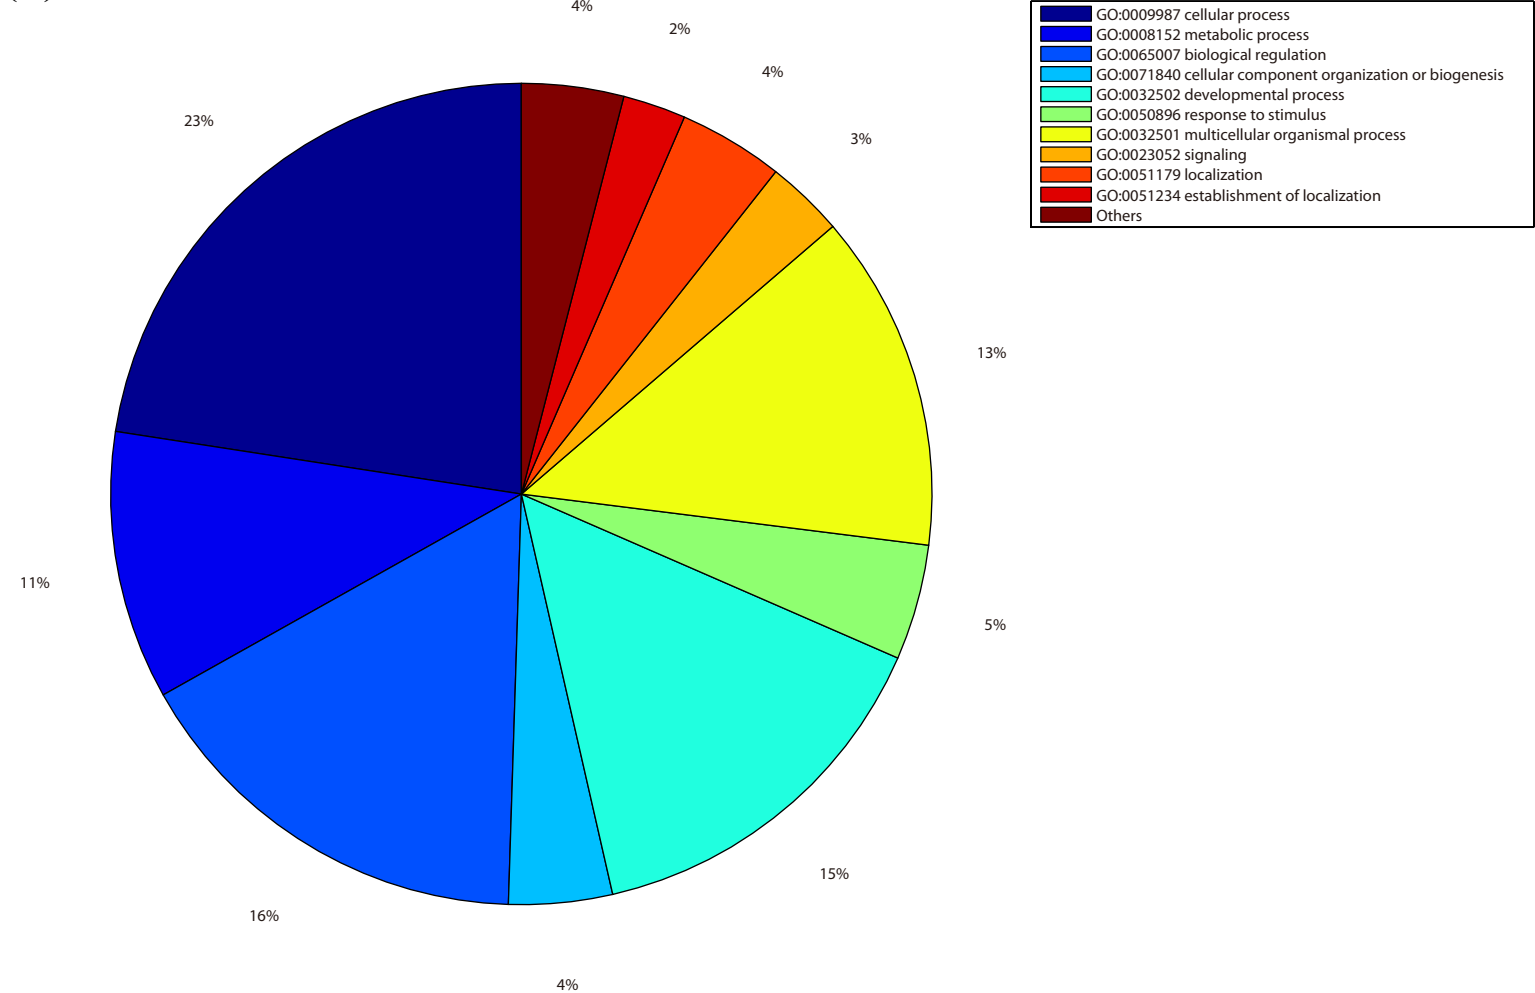

Supplement: S6 (10.1371/journal.pone.0041374.s006) [file journal.pone.0041374.s006]
