# Supplementary material for: Comprehensive Identification and Annotation of Cell Type-Specific and Ubiquitous CTCF-Binding Sites in the Human Genome
Source: PLOS journal article supplement (doi:10.1371/journal.pone.0041374), 2012-07-19
Supplement: S17 (10.1371/journal.pone.0041374.s017) [file journal.pone.0041374.s017]

**(A)**

**K562**

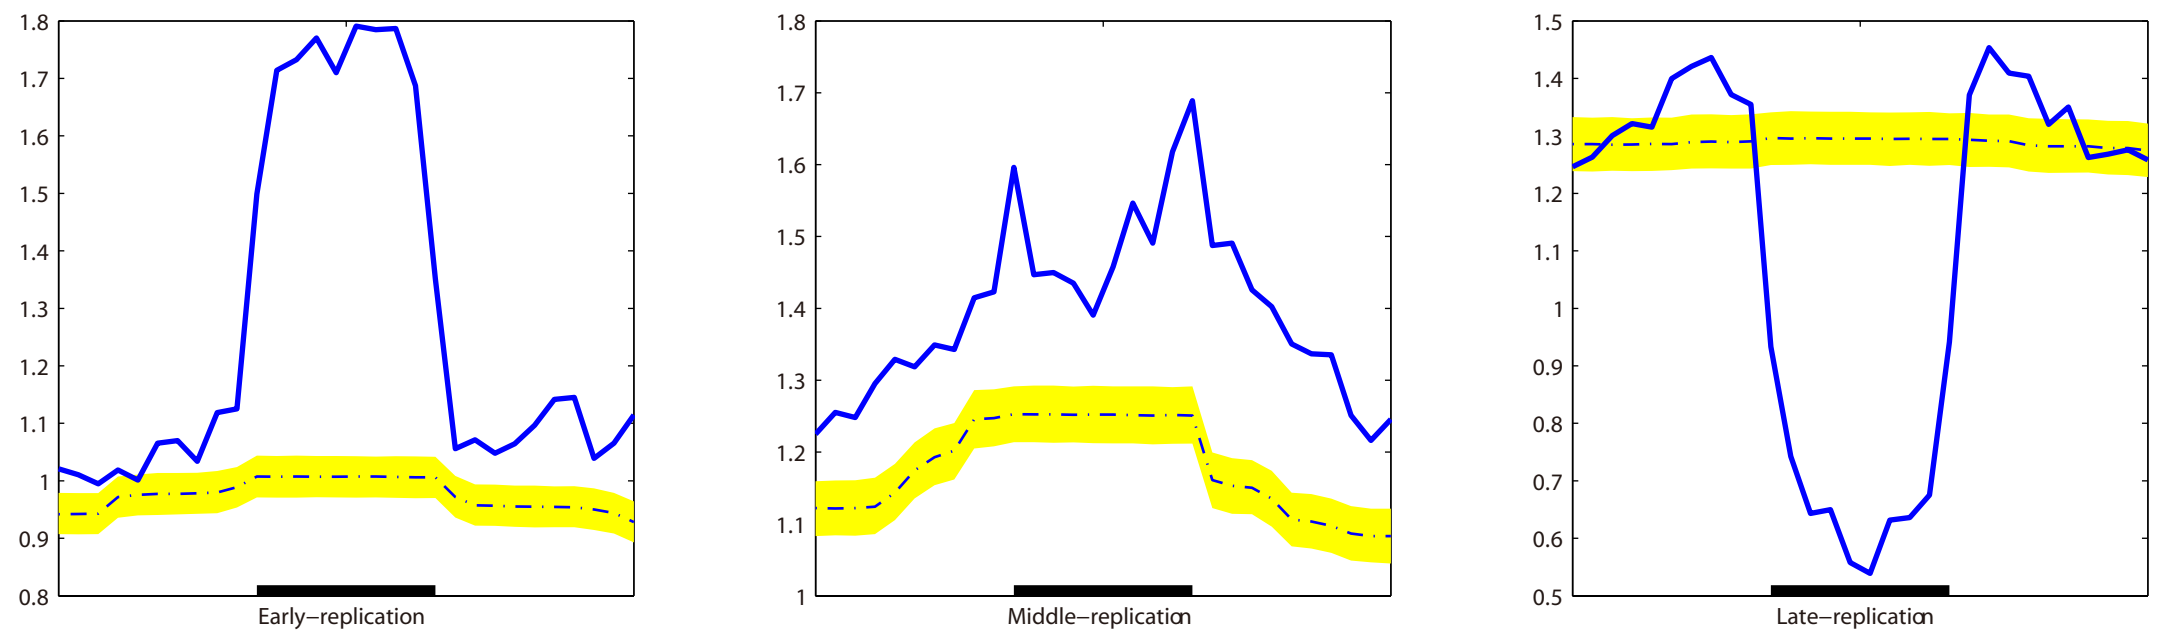

**(B)**

**GM12878**

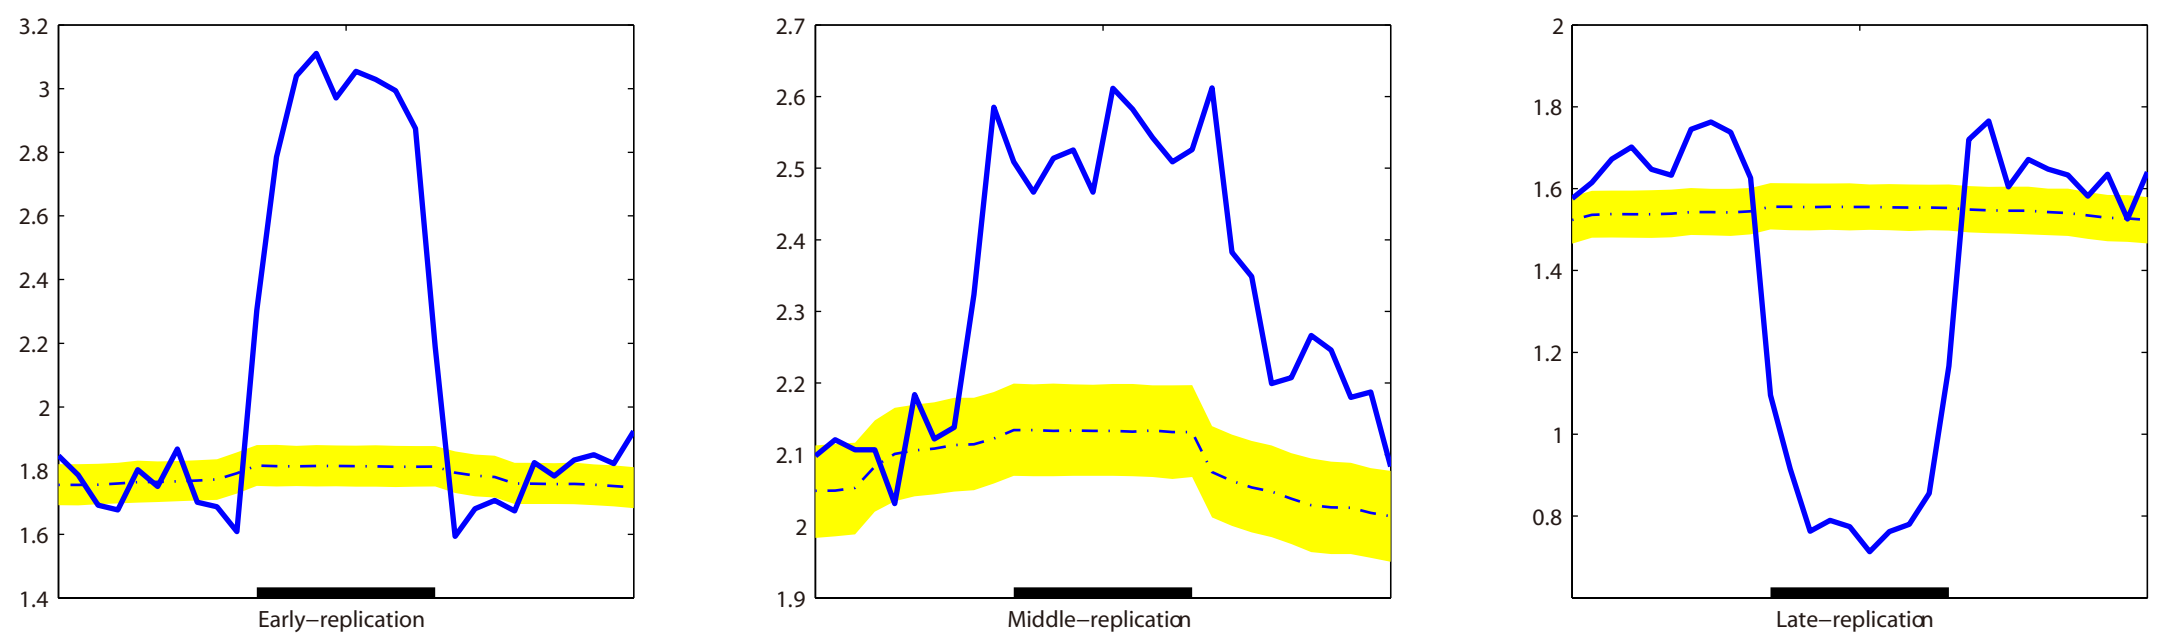

**Figure S17**
