# Supplementary material for: Comprehensive Identification and Annotation of Cell Type-Specific and Ubiquitous CTCF-Binding Sites in the Human Genome
Source: PLOS journal article supplement (doi:10.1371/journal.pone.0041374), 2012-07-19

Figure S18

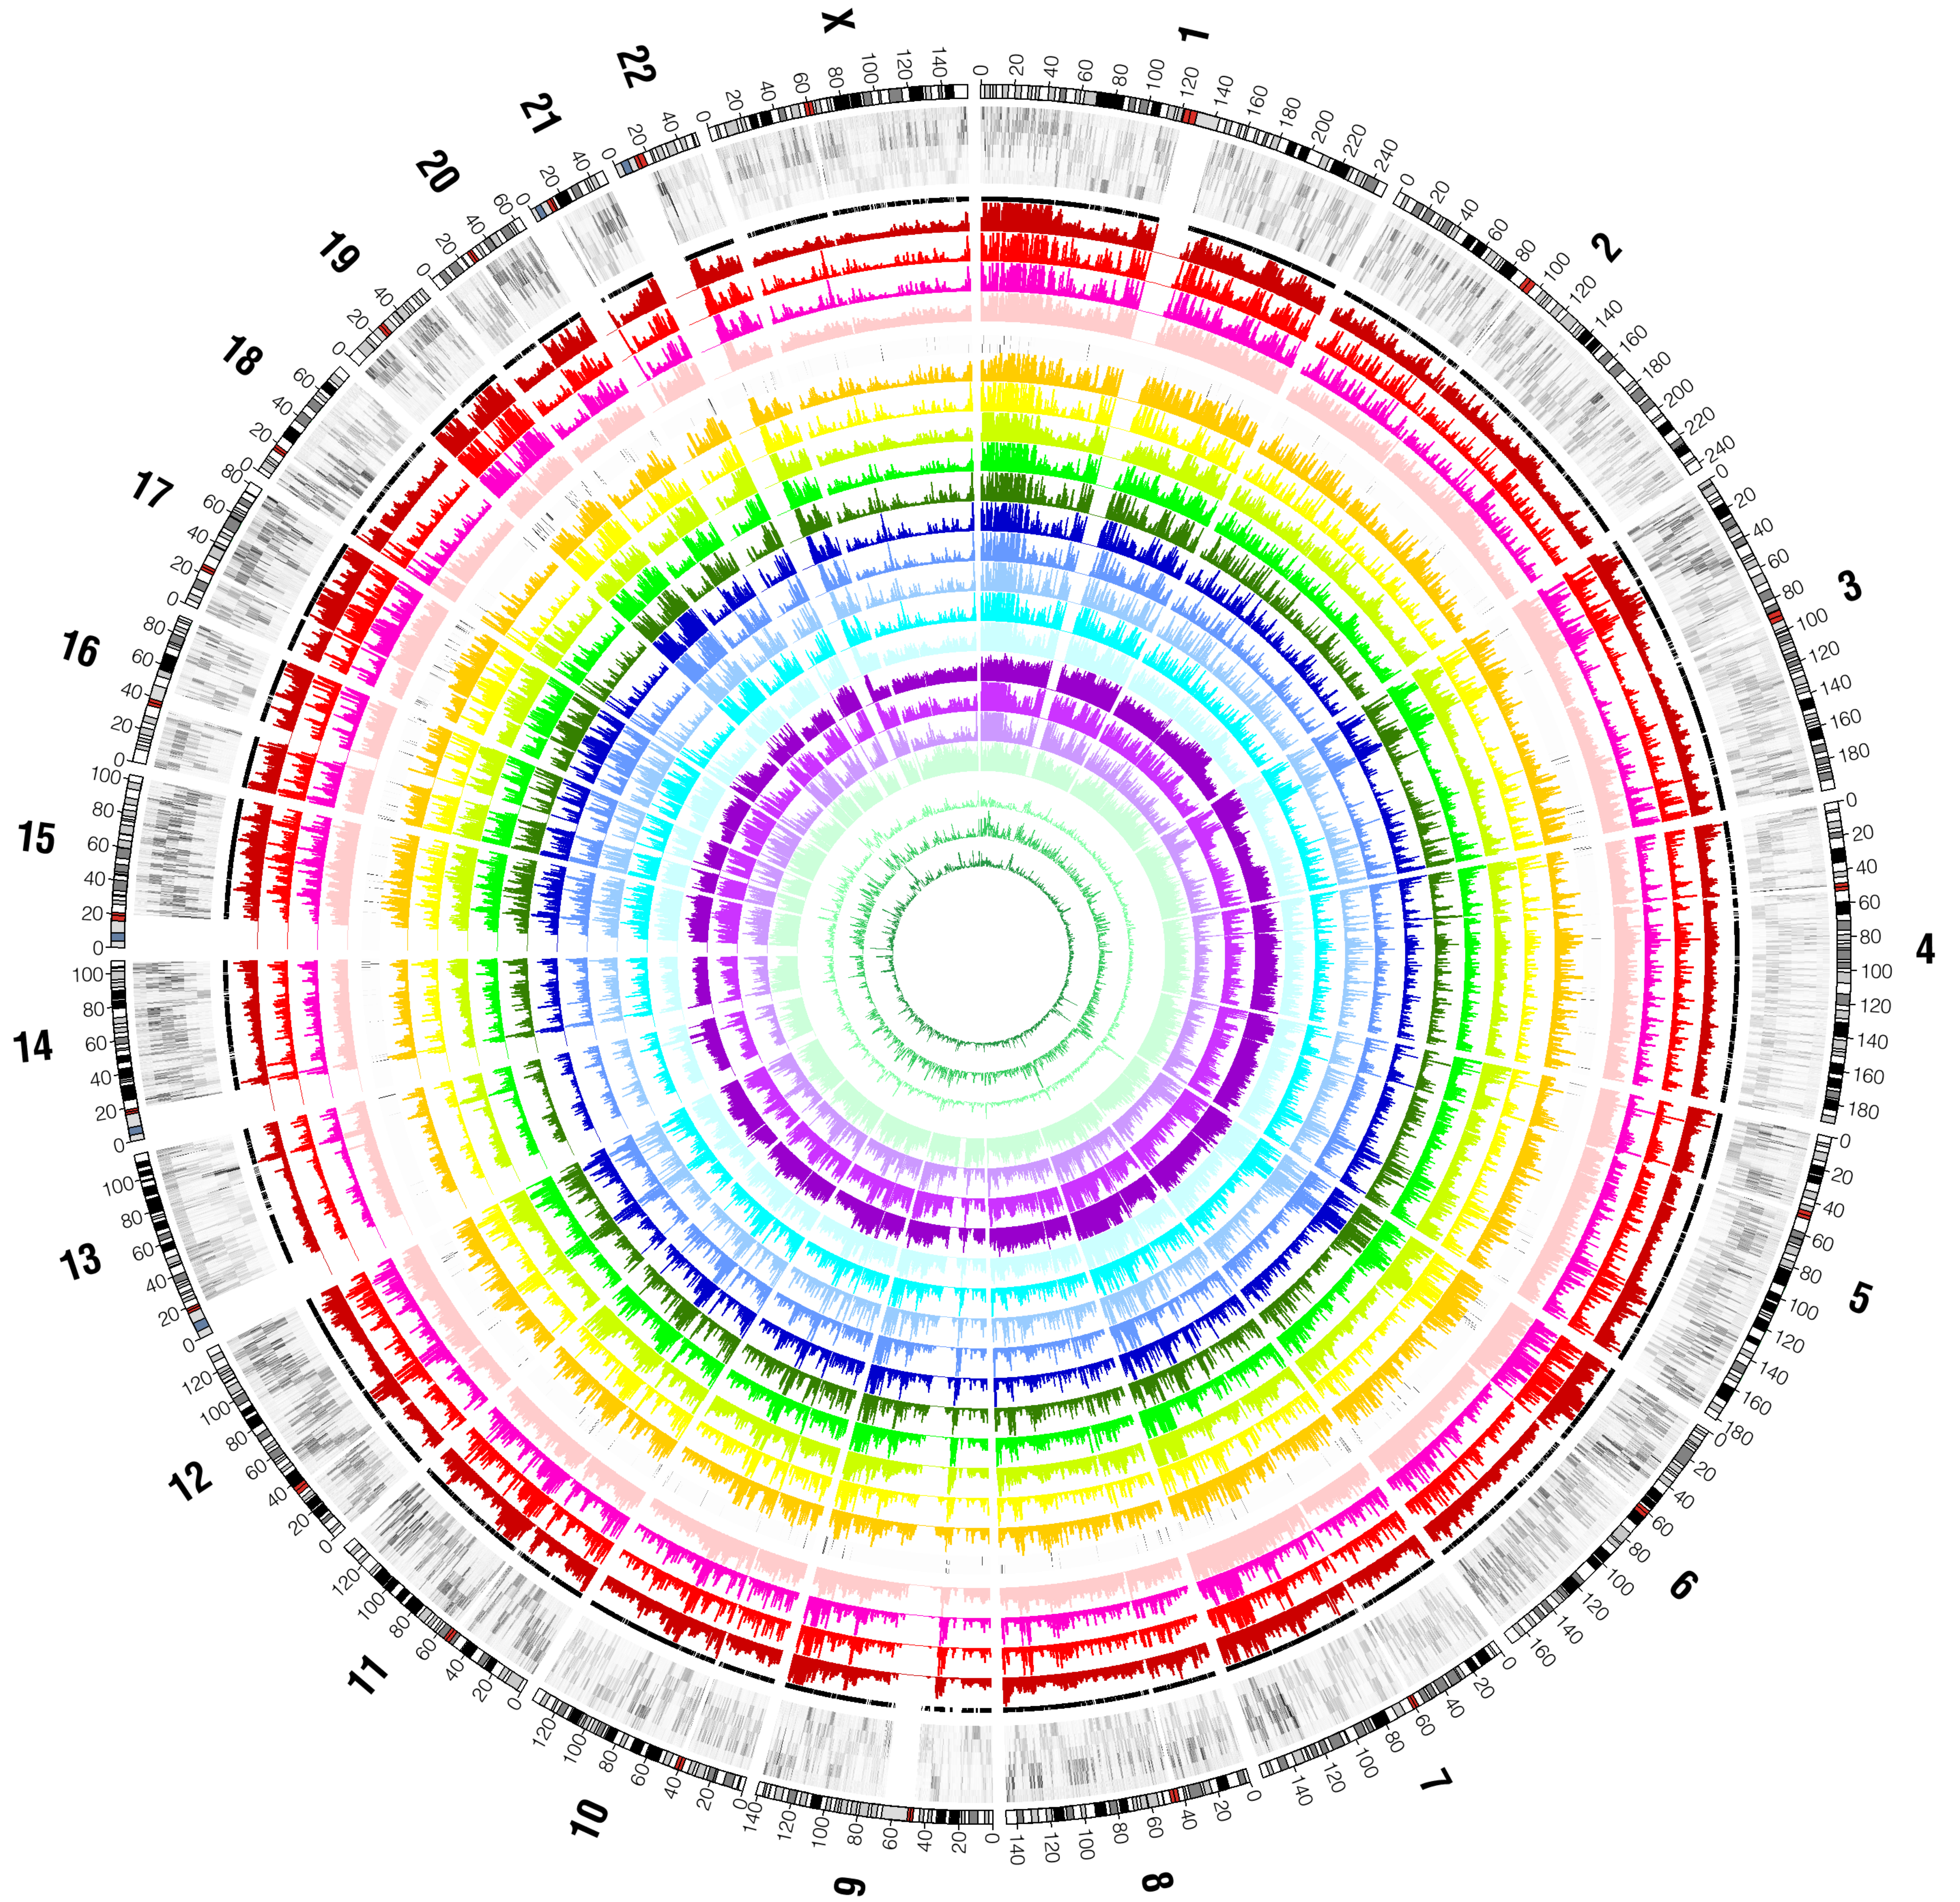

Supplement: S18 (10.1371/journal.pone.0041374.s018) [file journal.pone.0041374.s018]
