# Supplementary material for: Comprehensive Identification and Annotation of Cell Type-Specific and Ubiquitous CTCF-Binding Sites in the Human Genome
Source: PLoS One. 2012 Jul 19;7(7):e41374. doi: 10.1371/journal.pone.0041374 (PMC3400636; doi:10.1371/journal.pone.0041374)
Supplement: Table S1 — Identification and characterization of CTCF binding-sites across 38 cell types. (A) The proportion of each CTCF-binding site type across 38 cell types. (B) The proportion of each CTCF-binding site among the strongest scoring (top 20%) CTCF-binding sites across 38 cell types. (C) The proportion of each CTCF-binding site type among the weakest scoring (bottom 20%) CTCF-binding sites across 38 cell types. (D) The proportion of each CTCF-binding site type that located within annotated genes across 38 cell types. (XLSX) [file pone.0041374.s019.xlsx]

## Sheet: Table S1A
Table S1A. Identification and characteriation of CTCF binding sites in different cell types
Cell type	Classification by cell type									Classification by known genes												Total
	Cell type specific			Common			Ubiquitous			Proximal promoter (<1kb)			Exons			Introns			Intergenic region
	Count	percent	Avg. Score	Count	percent	Avg. Score	Count	percent	Avg. Score	Count	percent	Avg. Score	Count	percent	Avg. Score	Count	percent	Avg. Score	Count	percent	Avg. Score	Count	Avg. Score
AG04449	4281	5.23663	7.2740±2.8413	58203	71.1955	27.6710±42.1754	19267	23.5679	176.3092±135.4419	13498	16.5111	54.3272±97.9594	5334	6.52469	56.7591±100.5449	22836	27.9336	55.9880±85.9372	40083	49.0306	67.9596±104.1636	81751	61.6338±98.3126
AG04450	2247	3.49739	9.2790±3.3302	42750	66.539	30.2800±32.1466	19251	29.9636	142.7402±79.3247	7721	12.0175	58.4797±70.2488	3189	4.96358	59.1828±71.4851	20112	31.3037	58.9763±68.9432	33226	51.7152	67.3214±75.3944	64248	63.2426±72.7453
AG09309	1457	2.38598	7.4509±2.3468	40387	66.1377	26.3322±30.4555	19221	31.4763	128.0411±77.1881	7480	12.2492	54.2761±68.3765	3077	5.03889	55.5551±70.5830	18594	30.4495	53.2108±63.5040	31914	52.2623	61.6997±71.7392	61065	57.8959±68.9730
AG09319	2519	3.64882	10.4013±3.3101	47274	68.4773	42.0394±53.4357	19243	27.8739	238.7312±138.4244	9183	13.3018	84.5737±118.7679	3687	5.34069	86.6903±121.8813	20957	30.3566	89.1032±114.9127	35209	51.0009	103.4927±129.0500	69036	95.7106±123.4352
AG10803	2996	4.80321	10.5077±3.2785	40129	64.3351	35.6302±39.6066	19250	30.8617	172.0829±94.9861	7913	12.6862	64.7244±81.1393	3084	4.94429	68.2863±85.0110	19123	30.6581	73.2890±84.9700	32255	51.7114	82.1459±92.7786	62375	76.5352±88.8678
AoAF	1591	2.7127	6.7857±2.1140	37811	64.4689	21.1031±24.0676	19248	32.8184	97.4121±61.1903	7704	13.1355	42.7181±53.9858	3164	5.39471	43.5262±55.3234	17690	30.162	41.9053±49.0175	30092	51.3078	49.0360±56.3137	58650	45.7581±53.9543
BJ	2784	4.00956	11.4109±4.2034	47437	68.3196	37.6430±44.3212	19213	27.6709	209.6257±121.1046	9521	13.7123	73.6031±103.5092	3659	5.26975	77.1796±107.7076	20810	29.9709	78.9809±99.1359	35444	51.047	90.7969±111.7382	69434	84.1803±106.9923
CACO2	5722	8.17569	13.3661±4.8068	45038	64.351	32.6039±29.4337	19228	27.4733	115.9400±76.2577	8592	12.2764	50.3594±59.2727	3546	5.06658	50.0860±57.4764	20953	29.938	50.7955±54.7046	36897	52.719	56.9038±63.6560	69988	53.9263±60.3373
GM06990	3666	5.91825	14.6192±4.6634	39088	63.1022	36.3583±33.0103	19190	30.9796	140.4938±70.0551	7548	12.1852	62.7369±72.6417	3117	5.03196	63.4921±69.4554	18609	30.0417	63.3332±62.3473	32670	52.7412	71.0387±69.7878	61944	67.3325±68.0979
GM12801	617	2.19058	4.5997±2.6279	8536	30.306	8.7731±5.4822	19013	67.5034	16.0605±7.3045	2865	10.1718	13.5183±7.5111	1206	4.28176	13.9677±7.7856	8521	30.2528	13.2270±7.1553	15574	55.2936	13.7923±7.8775	28166	13.6009±7.6288
GM12864	2071	3.32386	6.5789±1.6604	40991	65.7888	22.4140±28.1770	19245	30.8874	109.0453±69.1846	8209	13.1751	46.9158±64.0113	3403	5.46167	48.1793±63.6318	18181	29.1797	43.7221±52.5893	32514	52.1835	51.8846±62.8052	62307	48.6458±60.3253
GM12865	4243	7.61869	10.5336±3.2664	32292	57.9832	26.2125±28.5782	19157	34.3981	101.8723±76.8298	7821	14.0433	50.0944±65.8941	3203	5.75127	51.0890±68.5050	15566	27.9502	45.3247±53.2934	29102	52.2553	54.3524±64.7042	55692	51.0435±62.2576
GM12872	1852	3.13824	6.6339±1.7713	37911	64.2407	21.1346±25.5454	19251	32.6211	98.6870±63.7035	8004	13.5629	44.4544±58.7352	3246	5.50039	46.4584±61.5081	16949	28.7203	41.3947±48.5721	30815	52.2164	48.8439±57.5665	59014	45.9779±55.6278
GM12873	1985	3.09963	6.5783±1.6261	42805	66.841	23.1956±30.3165	19250	30.0593	124.3445±77.2789	8673	13.5431	49.8448±71.5770	3534	5.51843	51.2145±71.6091	18519	28.9179	47.9594±59.3617	33314	52.0206	56.9767±70.5250	64040	53.0852±67.8240
GM12874	3125	5.71476	11.7306±2.8863	32387	59.2268	28.7133±34.9851	19171	35.0584	102.6547±80.0075	8050	14.7212	54.7983±72.7000	3269	5.97809	54.9251±71.8729	15195	27.7874	46.4942±53.2463	28169	51.5133	57.0639±68.0453	54683	53.6655±65.4226
GM12875	1839	2.89051	6.6487±1.6912	42522	66.8354	22.7651±27.6254	19261	30.2741	106.7261±66.2167	8184	12.8635	46.8713±60.9376	3456	5.43208	47.1635±60.8428	18750	29.4709	43.2110±51.0763	33232	52.2335	50.5266±60.2947	63622	47.7177±57.9359
GM12878	1751	3.97449	7.9081±2.4437	23207	52.6761	17.4162±14.9757	19098	43.3494	52.0660±31.5563	5116	11.6125	33.1206±33.3224	2107	4.78255	33.1723±31.6057	13180	29.9165	29.3660±26.2018	23653	53.6885	33.2304±29.7303	44056	32.0588±29.3204
HAsp	1000	1.6301	7.7640±2.4414	41099	66.9954	27.2092±29.7890	19247	31.3745	126.1493±71.7232	7413	12.0839	55.6652±66.5203	3248	5.29456	54.3698±66.5827	18884	30.7828	53.3120±60.3450	31801	51.8388	61.5719±68.5657	61346	57.9342±65.8937
HBMEC	5522	5.74909	10.6233±3.2463	71288	74.2197	42.1948±58.0693	19240	20.0312	291.8288±183.0852	12239	12.7423	82.5643±133.4057	5097	5.30661	85.0855±137.8622	29907	31.1369	82.5882±129.4564	48807	50.8142	97.6761±146.3692	96050	90.3845±139.4116
HCFaa	1585	2.34336	9.4126±2.4547	46797	69.1874	32.7295±35.5015	19256	28.4692	169.5147±95.6720	8066	11.9252	65.1107±83.8225	3305	4.88631	68.3613±87.9965	21046	31.1156	66.0590±79.9183	35221	52.0728	75.7883±88.9046	67638	71.1248±85.6920
HCPEpiC	7909	8.33175	9.6173±3.4256	67779	71.4019	44.1072±68.6536	19238	20.2663	332.9640±224.3901	13588	14.3143	82.0999±150.5945	5380	5.66757	88.0119±157.2035	28823	30.3637	91.7257±153.6893	47135	49.6545	111.1335±176.8282	94926	99.7742±165.7725
HEEpiC	2910	4.3638	10.1323±3.7273	44516	66.7556	35.2107±42.0160	19259	28.8806	189.7458±115.8647	8201	12.2981	70.8625±96.7848	3450	5.17358	72.7675±99.0143	20022	30.0247	73.2073±93.6509	35012	52.5036	84.3508±104.7215	66685	78.7469±100.4248
HEK293T	7468	7.89387	9.3692±3.7030	67869	71.7393	34.5800±45.7671	19268	20.3668	193.9477±134.4743	10610	11.2151	64.9924±98.4870	4689	4.9564	64.3214±100.7768	28595	30.2257	58.9388±87.7305	50711	53.6029	68.5717±101.7181	94605	65.0480±97.3719
Hela	1800	3.85745	8.7278±2.9925	25730	55.14	21.4504±18.8697	19133	41.0025	67.3752±45.5027	5444	11.6666	40.9050±42.9679	2261	4.84538	41.0827±42.7669	13635	29.2202	36.1982±35.4950	25323	54.2678	41.3688±40.7895	46663	39.7900±39.7530
HepG2	12194	12.5979	9.3931±4.5914	65363	67.5279	25.3036±28.2590	19237	19.8742	99.7257±72.8029	11123	11.4914	39.4727±53.1232	5059	5.22656	39.6037±55.7110	28897	29.8541	34.8487±46.1748	51715	53.4279	39.4556±51.8613	96794	38.0900±50.6401
HL60	975	2.34386	5.5579±2.0332	21456	51.5794	11.8205±8.6715	19167	46.0767	30.0660±16.5227	4515	10.8539	19.6215±14.7697	1897	4.56032	20.2551±15.3349	12326	29.6312	19.0793±13.9534	22860	54.9546	20.6967±16.9637	41598	20.0806±15.8350
HMEC	3369	4.1341	10.0558±4.2253	58863	72.2307	41.0323±53.6103	19261	23.6352	237.7027±132.2727	10929	13.411	76.2158±114.4650	4472	5.48759	78.3719±117.4676	23833	29.2455	80.2242±105.6084	42259	51.856	93.0483±120.4467	81493	86.2350±115.5427
HMF	1625	2.68227	6.5508±2.2292	39735	65.5877	23.1502±22.8858	19223	31.73	93.3697±46.9976	6073	10.0243	39.5587±42.7241	2540	4.1926	41.2575±44.4542	19894	32.8376	43.5198±44.8926	32076	52.9455	47.2175±47.7112	60583	44.9856±46.2562
HPAF	2686	3.52906	10.9434±3.1578	54178	71.1829	45.3793±54.6401	19247	25.2881	260.0479±127.1218	8824	11.5936	84.8454±113.4881	3650	4.79563	89.1263±118.1841	24334	31.9717	93.6479±118.1332	39303	51.6391	105.3426±127.6096	76111	98.4496±122.8447
HPF	1951	3.07666	9.1307±3.3748	42216	66.5731	31.3608±33.8648	19246	30.3502	154.7685±86.7423	7578	11.9502	61.2635±75.1065	3150	4.96744	63.2321±78.2192	19841	31.2885	64.0823±75.4092	32844	51.7938	72.6319±82.8278	63413	68.1314±79.5784
HRE	2125	3.24576	8.6339±3.1783	44171	67.4675	23.9951±22.2722	19174	29.2867	95.8259±49.4318	8013	12.2392	41.0664±45.9436	3240	4.94883	42.4170±47.7996	19968	30.4995	42.0703±43.4713	34249	52.3125	46.9807±47.7585	65470	44.5333±46.3416
HRPEpiC	2587	3.62782	10.7194±3.7973	49469	69.3718	39.5833±42.5895	19254	27.0004	191.7568±93.9376	7861	11.0237	72.5576±86.8820	3333	4.67396	74.3411±89.4698	22669	31.7894	75.2630±87.6829	37447	52.513	84.2170±94.0693	71310	79.6237±91.2185
HUVEC	2252	3.68468	12.0990±4.5920	39620	64.8254	40.3118±53.1510	19246	31.4899	197.8757±140.7300	9568	15.655	79.1369±117.8240	3820	6.2502	82.9906±120.3530	17148	28.0572	80.7347±102.7206	30582	50.0376	97.2490±121.9934	61118	88.8890±116.4299
K562	3765	5.5379	9.6486±5.7605	44984	66.1666	28.7165±38.0572	19237	28.2955	122.0824±100.2972	8258	12.1466	58.0363±89.9994	3710	5.45701	55.2022±88.2170	20146	29.6326	48.8682±68.5325	35872	52.7638	55.9781±73.3398	67986	54.0789±75.1660
NHEK	3097	4.53613	12.4175±5.3112	45981	67.3477	34.2115±39.0738	19196	28.1161	137.2545±99.6211	8896	13.0299	62.4430±84.4951	3842	5.62733	62.1364±83.5887	19611	28.724	55.1705±66.8105	35925	52.6189	65.9738±80.5800	68274	62.1946±77.7406
SAEC	3175	5.06355	10.0176±3.3145	40329	64.3175	34.8312±43.1115	19199	30.6189	159.1287±109.5854	9357	14.9227	65.2033±93.7410	3915	6.24372	64.8641±91.8916	17357	27.6813	65.9515±80.8522	32074	51.1523	77.4102±94.8046	62703	71.6333±90.9959
SKNSH	5002	6.48322	9.7531±4.9397	52896	68.5599	33.1831±45.1105	19255	24.9569	197.6106±129.9173	11660	15.1128	63.0123±100.4718	4522	5.86108	65.2147±101.4144	22072	28.6081	67.4596±95.1740	38899	50.418	79.4478±109.6591	77153	72.7001±104.0694
WERI	8464	9.56719	12.7353±8.2324	60749	68.667	36.0204±44.0587	19256	21.7658	141.6551±104.9641	10681	12.0732	57.2917±85.5832	4813	5.44032	56.9264±82.1761	26411	29.8534	53.0401±70.8069	46564	52.6331	58.7781±75.9034	88469	56.7849±76.0715

## Sheet: Table S1B
Table S1B. Identification and characteriation of CTCF binding sites in different cell types
Cell type	Classification by cell type									Classification by known genes												Total
	Cell type specific			Common			Ubiquitous			Proximal promoter (<1kb)			Exons			Introns			Intergenic region
	Count	percent	Avg. Score	Count	percent	Avg. Score	Count	percent	Avg. Score	Count	percent	Avg. Score	Count	percent	Avg. Score	Count	percent	Avg. Score	Count	percent	Avg. Score	Count	Avg. Score
AG04449	363	2.22005	209.67±3,364.99	3570	21.8335	183.67±3,243.58	12418	75.9464	211.74±3,940.48	2228	13.6261	214.61±4,167.63	922	5.6388	212.76±4,160.62	4095	25.0443	197.26±3,584.92	9106	55.6908	206.35±3,909.99	16351	205.56±3,909.52
AG04450	60	0.466926	170.92±1,567.79	1412	10.9883	156.1±1,284.16	11378	88.5447	180.44±1,912.99	1389	10.8093	180.86±1,832.78	580	4.51362	179.32±1,889.27	3542	27.5642	174.26±1,814.18	7339	57.1128	178.68±1,946.94	12850	177.72±1,900.42
AG09309	12	0.098256	207.04±3,536.46	1310	10.7263	169.41±1,782.54	10891	89.1755	196.92±2,498.19	1384	11.3322	196.99±2,510.33	582	4.76541	195.93±2,492.25	3221	26.3735	190.68±2,381.9	7026	57.5289	194.73±2,536.53	12213	193.98±2,495.07
AG09319	33	0.238992	223.74±1,944.09	1704	12.3407	225.31±1,923.99	12071	87.4203	254.3±2,225.79	1538	11.1385	255.21±2,326.26	645	4.67121	254.06±2,419.82	3716	26.9119	246.71±2,251.39	7909	57.2784	251.34±2,261.16	13808	250.65±2,280.49
AG10803	45	0.360721	173.53±985.66	1242	9.95591	170.34±1,160.77	11188	89.6834	193.83±1,628.7	1262	10.1162	192.5±1,573.2	535	4.28858	189.28±1,601.98	3460	27.7355	189.5±1,591.62	7218	57.8597	192.31±1,658.01	12475	191.42±1,630.41
AoAF	80	0.682012	149.38±1,609.33	1380	11.7647	139.56±1,351.21	10270	87.5533	161.84±1,976.84	1417	12.0801	163±1,998.63	584	4.97869	162.36±2,033.38	3026	25.7971	155.15±1,811.33	6703	57.1441	159.84±1,988.37	11730	159.14±1,952.89
BJ	43	0.309642	210.09±2,489.36	1709	12.3065	195.92±2,360.31	12135	87.3839	230.43±3,088.63	1618	11.6512	232.19±3,254.4	651	4.68784	231.14±3,342.47	3726	26.8308	220.02±2,999.44	7892	56.8301	227.34±3,113.7	13887	226.12±3,126.46
CACO2	79	0.564366	110.4±2,163.09	2551	18.224	91.27±1,078.79	11368	81.2116	110.65±1,933.44	1672	11.9446	109.98±1,893.2	673	4.80783	108.05±1,745.81	3660	26.1466	103.29±1,617.15	7993	57.101	108.19±1,920.34	13998	107.12±1,834.93
GM06990	67	0.540802	117.04±1,604.55	1405	11.3407	114.2±1,381.72	10917	88.1185	129.03±1,641.84	1480	11.9461	132.68±1,789.58	632	5.1013	130.86±1,818.99	3128	25.2482	123.34±1,452.23	7149	57.7044	127.58±1,652.3	12389	127.28±1,634.8
GM12801	45	0.798722	35.47±79.5	271	4.81008	32.75±131.44	5318	94.3912	34.4±104.71	622	11.0401	34.15±81.11	264	4.68584	35.69±118.52	1524	27.0501	33.98±108.33	3224	57.224	34.42±108.33	5634	34.33±105.93
GM12864	51	0.409244	168.45±2,082.8	1529	12.2693	161.38±2,296.32	10882	87.3215	179.54±2,661.22	1593	12.7829	184.55±2,781.32	669	5.36832	183.96±2,831.99	3063	24.5787	171.4±2,398.11	7137	57.2701	177.53±2,680.64	12462	177.27±2,649.87
GM12865	78	0.700242	106.4±1,631.68	1768	15.8722	109.09±1,945	9293	83.4276	128.89±2,765.21	1642	14.741	132.63±3,006.25	679	6.0957	134.04±3,109.24	2486	22.318	117.78±2,125.03	6332	56.8453	125.93±2,726.23	11139	125.59±2,682.01
GM12872	55	0.465983	141.5±1,234.71	1415	11.9885	151.64±2,048.37	10333	87.5455	168.17±2,537.18	1574	13.3356	172.25±2,603.27	668	5.65958	172.72±2,905.45	2837	24.0363	160.16±2,224.35	6724	56.9686	166.44±2,530.89	11803	166.06±2,504.13
GM12873	36	0.281074	181.87±1,817.89	1412	11.0244	179.44±2,449.66	11360	88.6946	199.14±2,844.59	1593	12.4375	205.04±2,892.04	659	5.14522	204.88±3,067.46	3169	24.7423	190.08±2,611.07	7387	57.6749	197.4±2,861.07	12808	196.92±2,836.86
GM12874	81	0.740605	112.94±1,896.88	1990	18.1951	118.45±2,463.65	8866	81.0643	130.29±2,857.82	1771	16.1927	136.79±3,217.94	699	6.39115	137.18±3,290.03	2338	21.377	118.53±2,147.06	6129	56.0391	128.04±2,808.96	10937	128.01±2,801.52
GM12875	31	0.243615	166.88±3,784.87	1667	13.1002	153.79±1,932.48	11027	86.6562	174.66±2,498.73	1616	12.6994	178.88±2,634.85	685	5.3831	178.39±2,682.24	3139	24.668	167.3±2,309.7	7285	57.2495	171.73±2,471.39	12725	171.9±2,477.29
GM12878	53	0.601453	80.88±1,142.86	776	8.80617	74.65±1,036.38	7983	90.5924	82.63±852.29	1151	13.0617	85.18±1,079.58	460	5.22015	84.92±993.61	2164	24.5574	78.96±747.16	5037	57.1607	82.16±865.89	8812	81.91±875.37
HAsp	22	0.179299	170.4±1,100.62	1308	10.6601	157.42±1,625.38	10940	89.1606	182.18±2,273.71	1421	11.5811	183.6±2,293.25	600	4.88998	182.51±2,316	3271	26.6585	175.3±2,163.04	6978	56.8704	180.41±2,282.41	12270	179.52±2,261.03
HBMEC	23	0.119729	240.63±4,138.57	4400	22.9047	203.65±2,901.44	14787	76.9755	257.55±3,535	2109	10.9787	247.33±3,818.95	909	4.73191	245.48±4,006.72	5402	28.1208	241.89±3,878.2	10790	56.1687	246.39±3,916.16	19210	245.18±3,903.48
HCFaa	40	0.295683	185.02±3,236.97	1505	11.1251	182.34±1,874.5	11983	88.5792	213.51±2,739.41	1448	10.7037	215.07±2,713.6	605	4.47221	216.97±2,843.23	3717	27.4763	205.23±2,662.84	7758	57.3477	210.72±2,758.21	13528	209.96±2,742.51
HCPEpiC	23	0.121142	216.98±2,324.5	4422	23.2908	224.63±3,064.69	14541	76.588	275.15±2,965.64	2115	11.1398	261.76±3,494.6	901	4.7456	261.86±3,418.58	5340	28.126	259.88±3,500.85	10630	55.9886	265.47±3,400.74	18986	263.32±3,446.49
HEEpiC	21	0.157457	186.04±2,144.43	1646	12.3416	182.22±1,601.7	11670	87.5009	216.22±2,351.28	1396	10.4671	215.6±2,256.01	604	4.52875	214.61±2,330.75	3619	27.135	208.96±2,339.75	7718	57.8691	212.52±2,425.46	13337	211.97±2,384.51
HEK293T	70	0.369959	171.91±2,712.38	4783	25.2788	160.39±2,226.4	14068	74.3512	200.32±3,404.55	2129	11.252	191.5±3,506.71	907	4.79362	193.33±3,557.24	5012	26.4891	187.55±3,359.75	10873	57.4653	190.78±3,390.68	18921	190.12±3,406.24
Hela	57	0.610736	94.93±834.34	991	10.6182	88.84±1,005.93	8285	88.771	101.64±1,448.73	1202	12.879	104.12±1,517.72	492	5.27162	103.16±1,533.27	2235	23.9473	96.04±1,259.52	5404	57.9021	100.84±1,431.59	9333	100.24±1,413.66
HepG2	87	0.449403	111.81±1,511.93	6242	32.2434	103.61±1,402.04	13030	67.3072	133.64±2,497.13	2322	11.9944	127.32±2,461.5	1041	5.37734	127.75±2,621.46	5056	26.1171	120.65±2,169.47	10940	56.5112	124.24±2,351.86	19359	123.86±2,336.9
HL60	31	0.372596	60.42±379.43	593	7.1274	56.55±236.85	7696	92.5	62.78±360.98	912	10.9615	62.26±290.78	397	4.77163	63.71±368.27	2145	25.7812	61.71±336.18	4866	58.4856	62.49±373.53	8320	62.32±354.78
HMEC	74	0.454016	243.8±2,401.97	2886	17.7066	222.97±1,930.11	13339	81.8394	254.2±2,407.97	1838	11.2768	254.88±2,517.66	753	4.61992	253.86±2,592.89	4291	26.3268	244.36±2,428.8	9417	57.7766	248.93±2,443.55	16299	248.62±2,465.44
HMF	22	0.181563	144.06±296.8	1287	10.6214	142.93±908.88	10808	89.197	165.12±1,531.78	995	8.2116	162.06±1,326.81	441	3.63951	163.15±1,525.93	3749	30.94	161.2±1,458.78	6932	57.2089	163.62±1,562.15	12117	162.73±1,510.74
HPAF	15	0.0985351	261.92±2,451.3	1943	12.7636	227.72±1,466.34	13265	87.1379	259.28±1,841.55	1436	9.43309	256.2±1,926.09	610	4.00709	257.48±1,890.88	4518	29.6788	252.86±1,924.43	8659	56.881	256.2±1,888.31	15223	255.26±1,905.19
HPF	29	0.228653	185.07±1,934.78	1307	10.3051	168.91±1,387.59	11347	89.4662	195.37±2,087.53	1304	10.2815	193.43±2,035.4	550	4.33651	194.83±2,114.95	3551	27.9981	189.99±2,025	7278	57.3839	193.59±2,107.14	12683	192.62±2,079.87
HRE	45	0.343669	135.19±1,588.74	1732	13.2274	117.84±1,091.71	11317	86.4289	137.33±1,692.25	1454	11.1043	138.76±1,686.66	610	4.65862	139.57±1,901.28	3504	26.7603	131.97±1,552.92	7526	57.4767	134.87±1,669.66	13094	134.74±1,656.04
HRPEpiC	23	0.161268	203.84±1,782.67	1796	12.5929	186.08±1,309.04	12443	87.2458	210.86±1,855.5	1411	9.89342	207.95±1,739.73	588	4.12284	208.55±1,920.41	4138	29.0142	205.43±1,833.32	8125	56.9696	208.8±1,875.97	14262	207.73±1,854.16
HUVEC	38	0.310864	198.23±3,770.69	2102	17.1957	190.82±2,966.84	10084	82.4935	213.61±3,452.94	1763	14.4224	218.14±3,715.02	741	6.06185	215.87±3,727.58	2905	23.7647	201±3,106.39	6815	55.751	210.46±3,432.72	12224	209.65±3,444.66
K562	90	0.661862	152.83±2,097.04	2507	18.4365	143.29±1,823.55	11001	80.9016	169.41±2,635.29	1741	12.8034	169.72±2,740.06	741	5.44933	169.16±2,765.64	3376	24.8272	161.41±2,478.26	7740	56.9201	164.21±2,567.68	13598	164.49±2,585.43
NHEK	57	0.41743	123.42±1,501.08	3044	22.2922	131.92±2,447.07	10554	77.2904	158.24±3,389.36	1881	13.7752	161.95±3,822.33	793	5.8074	161.04±3,789.83	3198	23.42	143.65±2,663.57	7783	56.9974	152.5±3,315.02	13655	152.23±3,294.71
SAEC	91	0.72562	153.49±2,029.09	2304	18.3717	149.68±2,251.69	10146	80.9026	172.2±2,964.75	1780	14.1934	176.94±3,302.22	722	5.75712	173.73±3,260.13	2961	23.6106	160.56±2,439.13	7078	56.4389	168.16±2,916.09	12541	167.93±2,904.42
SKNSH	71	0.460113	183.86±2,418.87	2782	18.0286	174.51±2,412.57	12578	81.5112	206.68±3,290.93	2000	12.9609	208.31±3,528.51	794	5.14549	206.24±3,539.56	3931	25.4747	193.96±3,019.84	8706	56.4189	201.63±3,284.03	15431	200.78±3,282.71
WERI	31	0.175201	137.52±1,515.17	5378	30.3945	150.82±2,004.42	12285	69.4303	176.55±2,760.16	2125	12.0097	173.14±2,921.1	929	5.25037	175.07±2,997.25	4721	26.6814	166.22±2,588.03	9919	56.0586	168.26±2,613.16	17694	168.66±2,669.85

## Sheet: Table S1C
Table S1C. Identification and characteriation of CTCF binding sites in different cell types
Cell type	Classification by cell type									Classification by known genes												Total
	Cell type specific			Common			Ubiquitous			Proximal promoter (<1kb)			Exons			Introns			Intergenic region
	Count	percent	Avg. Score	Count	percent	Avg. Score	Count	percent	Avg. Score	Count	percent	Avg. Score	Count	percent	Avg. Score	Count	percent	Avg. Score	Count	percent	Avg. Score	Count	Avg. Score
AG04449	2671	16.3354	4.8±0.45	13657	83.5239	5.05±0.53	23	0.140664	5.21±0.48	2982	18.2374	5.03±0.49	1128	6.89866	5.01±0.52	4431	27.0993	4.96±0.47	7810	47.7647	5.04±0.56	16351	5.01±0.52
AG04450	1611	12.537	4.62±0.41	11195	87.1206	4.98±0.55	44	0.342412	5.06±0.52	1610	12.5292	4.93±0.54	653	5.08171	5.01±0.52	4119	32.0545	4.91±0.52	6468	50.3346	4.94±0.57	12850	4.93±0.55
AG09309	1195	9.78466	4.37±0.37	10992	90.0025	4.89±0.66	26	0.212888	5.15±0.79	1626	13.3137	4.85±0.61	645	5.28126	4.86±0.68	3760	30.7869	4.79±0.62	6182	50.6182	4.86±0.68	12213	4.84±0.65
AG09319	1864	13.4994	4.8±0.66	11923	86.3485	5.26±0.78	21	0.152086	5.59±0.94	1979	14.3323	5.28±0.78	770	5.57648	5.25±0.78	4321	31.2935	5.17±0.78	6738	48.7978	5.19±0.8	13808	5.2±0.79
AG10803	2287	18.3327	4.54±0.35	10126	81.1703	4.87±0.49	62	0.496994	5.16±0.53	1731	13.8758	4.82±0.46	677	5.42685	4.88±0.48	3948	31.6473	4.79±0.47	6119	49.0501	4.82±0.5	12475	4.81±0.48
AoAF	1065	9.07928	4.67±0.42	10564	90.0597	4.98±0.55	101	0.86104	5.24±0.56	1772	15.1066	4.97±0.55	703	5.99318	4.98±0.54	3632	30.9633	4.94±0.54	5623	47.9369	4.96±0.54	11730	4.96±0.54
BJ	2050	14.762	4.75±0.51	11817	85.094	5.09±0.62	20	0.14402	5.55±0.58	2081	14.9852	5.1±0.66	740	5.32872	5.07±0.64	4287	30.8706	5.05±0.62	6779	48.8154	5.01±0.61	13887	5.04±0.62
CACO2	4287	30.6258	4.49±0.23	9631	68.8027	4.68±0.29	80	0.57151	4.75±0.28	1763	12.5947	4.66±0.29	688	4.91499	4.62±0.27	4356	31.1187	4.61±0.27	7191	51.3716	4.63±0.28	13998	4.62±0.28
GM06990	2798	22.5846	4.68±0.48	9585	77.367	5.17±0.63	6	0.0484301	5.72±0.59	1624	13.1084	5.07±0.59	665	5.36766	5.14±0.61	3736	30.1558	5.01±0.61	6364	51.3681	5.07±0.67	12389	5.06±0.64
GM12801	382	6.78026	4.81±0.48	3631	64.448	5.45±0.51	1621	28.7717	5.65±0.47	628	11.1466	5.45±0.46	230	4.08236	5.4±0.46	1782	31.6294	5.5±0.53	2994	53.1416	5.45±0.56	5634	5.46±0.54
GM12864	1521	12.2051	4.66±0.5	10939	87.7788	5.09±0.57	2	0.0160488	5.48±0.85	1899	15.2383	5.06±0.58	751	6.02632	5.06±0.56	3631	29.1366	5.02±0.58	6181	49.5988	5.04±0.58	12462	5.04±0.58
GM12865	3384	30.3797	4.58±0.3	7594	68.1749	4.89±0.32	161	1.44537	5.13±0.29	1500	13.4662	4.85±0.31	654	5.87126	4.85±0.33	3319	29.7962	4.78±0.33	5666	50.8663	4.79±0.34	11139	4.8±0.34
GM12872	1326	11.2344	4.74±0.5	10474	88.7402	5.14±0.55	3	0.0254173	5.21±0.76	1928	16.3348	5.13±0.55	774	6.55765	5.14±0.57	3308	28.0268	5.09±0.56	5793	49.0807	5.07±0.56	11803	5.09±0.56
GM12873	1444	11.2742	4.7±0.49	11361	88.7024	5.11±0.61	3	0.0234229	5.01±0.19	2012	15.7089	5.07±0.58	814	6.3554	5.12±0.56	3633	28.3651	5.04±0.6	6349	49.5706	5.07±0.64	12808	5.07±0.61
GM12874	2455	22.4467	4.68±0.45	8309	75.9715	5.13±0.6	173	1.58179	5.41±0.62	1579	14.4372	5.14±0.59	638	5.83341	5.06±0.58	3379	30.8951	5.01±0.61	5341	48.8342	5.02±0.6	10937	5.04±0.61
GM12875	1376	10.8134	4.65±0.41	11344	89.1473	5.08±0.54	5	0.0392927	5.14±0.12	1910	15.0098	5.03±0.53	761	5.98035	5.05±0.5	3812	29.9568	5.03±0.55	6242	49.053	5.03±0.56	12725	5.03±0.55
GM12878	1424	16.1598	4.65±0.44	7194	81.6387	5.22±0.51	194	2.20154	5.55±0.41	1068	12.1198	5.18±0.52	472	5.35633	5.25±0.53	2746	31.1621	5.12±0.52	4526	51.3618	5.12±0.56	8812	5.14±0.54
HAsp	735	5.99022	4.67±0.54	11523	93.912	5.4±0.86	12	0.0977995	6.08±0.79	1579	12.8688	5.34±0.81	687	5.59902	5.42±0.91	3902	31.8011	5.33±0.85	6102	49.7311	5.36±0.9	12270	5.35±0.88
HBMEC	4382	22.811	4.64±0.46	14823	77.1629	4.98±0.51	5	0.0260281	4.87±0.53	2567	13.3628	4.96±0.53	1026	5.34097	4.94±0.49	6145	31.9885	4.89±0.52	9472	49.3077	4.89±0.52	19210	4.9±0.52
HCFaa	1172	8.66351	4.87±0.59	12348	91.2774	5.4±0.78	8	0.0591366	6.05±0.42	1850	13.6753	5.38±0.77	676	4.99704	5.42±0.81	4255	31.4533	5.33±0.76	6747	49.8743	5.36±0.81	13528	5.35±0.79
HCPEpiC	5760	30.3381	4.61±0.44	13222	69.6408	4.85±0.47	4	0.0210682	5.32±0.13	2933	15.4482	4.8±0.47	1128	5.94122	4.83±0.46	5996	31.5812	4.77±0.47	8929	47.0294	4.77±0.48	18986	4.78±0.48
HEEpiC	2363	17.7176	4.78±0.46	10938	82.0124	5.2±0.54	36	0.269926	5.62±0.41	1846	13.8412	5.15±0.53	736	5.51848	5.17±0.57	4119	30.884	5.13±0.56	6636	49.7563	5.11±0.55	13337	5.13±0.55
HEK293T	5222	27.599	4.59±0.42	13696	72.3852	4.89±0.49	3	0.0158554	5.45±0.69	2145	11.3366	4.8±0.47	940	4.96802	4.81±0.48	5870	31.0237	4.81±0.49	9966	52.6716	4.81±0.49	18921	4.81±0.49
Hela	1479	15.847	4.71±0.46	7633	81.7851	5.31±0.66	221	2.36794	5.5±0.67	1165	12.4826	5.3±0.7	481	5.15376	5.3±0.66	2812	30.1296	5.2±0.64	4875	52.234	5.21±0.7	9333	5.22±0.68
HepG2	7169	37.0319	4.55±0.33	12072	62.3586	4.76±0.33	118	0.609536	4.89±0.28	2131	11.0078	4.71±0.31	980	5.06224	4.71±0.34	6137	31.701	4.68±0.34	10111	52.2289	4.67±0.34	19359	4.68±0.34
HL60	740	8.89423	4.55±0.37	7257	87.2236	5.09±0.62	323	3.88221	5.37±0.6	975	11.7188	5.06±0.58	389	4.67548	5.09±0.61	2548	30.625	5.07±0.63	4408	52.9808	5.05±0.63	8320	5.06±0.62
HMEC	2314	14.1972	5.09±0.71	13976	85.7476	5.37±0.8	9	0.0552181	6.06±0.4	2540	15.5838	5.37±0.77	959	5.8838	5.35±0.78	4779	29.3208	5.31±0.79	8021	49.2116	5.32±0.81	16299	5.33±0.79
HMF	1244	10.2666	4.52±0.49	10801	89.1392	5±0.77	72	0.594206	5.43±0.75	1353	11.1661	5.02±0.75	536	4.42354	4.99±0.81	4099	33.8285	4.91±0.72	6129	50.5818	4.97±0.79	12117	4.95±0.76
HPAF	2189	14.3796	4.75±0.59	13033	85.6139	5.24±0.81	1	0.00656901	5.77±0	1860	12.2184	5.21±0.82	740	4.86107	5.24±0.84	5158	33.8829	5.17±0.84	7465	49.0376	5.16±0.79	15223	5.17±0.81
HPF	1527	12.0397	4.61±0.39	11135	87.7947	5.04±0.63	21	0.165576	5.65±0.46	1653	13.0332	5.03±0.62	626	4.93574	5.01±0.63	4056	31.9798	4.98±0.62	6348	50.0512	4.98±0.62	12683	4.99±0.62
HRE	1502	11.4709	4.6±0.41	11574	88.3916	4.98±0.62	18	0.137468	5.19±0.5	1819	13.8919	4.95±0.61	714	5.45288	4.95±0.63	4043	30.8767	4.93±0.62	6518	49.7785	4.93±0.6	13094	4.93±0.61
HRPEpiC	2042	14.3178	4.73±0.55	12213	85.6332	5.19±0.79	7	0.0490815	5.4±0.53	1675	11.7445	5.17±0.75	666	4.66975	5.19±0.78	4771	33.4525	5.09±0.75	7150	50.1332	5.13±0.8	14262	5.12±0.78
HUVEC	1693	13.8498	5.07±1.09	10470	85.6512	5.75±1.37	61	0.499018	6.28±1.15	2085	17.0566	5.82±1.36	758	6.20092	5.75±1.37	3591	29.3766	5.58±1.39	5790	47.3658	5.63±1.38	12224	5.66±1.39
K562	2537	18.6572	4.72±0.43	10973	80.6957	5.05±0.47	88	0.647154	5.3±0.46	1720	12.6489	5.04±0.47	750	5.51552	5.04±0.48	4126	30.3427	4.97±0.48	7002	51.4929	4.98±0.49	13598	4.99±0.48
NHEK	2228	16.3164	5.01±0.79	11349	83.1124	5.5±0.95	78	0.571219	5.68±0.88	1825	13.3651	5.5±0.99	764	5.59502	5.51±1.07	4199	30.7506	5.42±0.96	6867	50.2893	5.4±0.93	13655	5.42±0.95
SAEC	2406	19.1851	4.7±0.43	10078	80.3604	5.08±0.58	57	0.454509	5.34±0.55	2176	17.3511	5.04±0.56	884	7.04888	5.03±0.58	3389	27.0234	4.98±0.55	6092	48.5767	5.01±0.59	12541	5.01±0.57
SKNSH	3311	21.4568	4.69±0.45	12092	78.3617	4.94±0.53	28	0.181453	5.29±0.58	2514	16.2919	4.92±0.53	924	5.98795	4.89±0.54	4512	29.2398	4.87±0.52	7481	48.4803	4.88±0.53	15431	4.89±0.53
WERI	4820	27.2409	5.52±0.98	12811	72.4031	5.73±0.99	63	0.356053	6.01±0.93	2163	12.2245	5.71±0.96	1007	5.69119	5.69±1	5522	31.2083	5.66±1	9002	50.876	5.67±1	17694	5.67±1

## Sheet: Table S1D
Table S1D. Identification and characteriation of CTCF binding sites in different cell types
Cell type	Cell type specific									Common									Ubiquitous
	Proximal promoter (<1kb)		Exons		Introns		Intergenic region		Total	Proximal promoter (<1kb)		Exons		Introns		Intergenic region		Total	Proximal promoter (<1kb)		Exons		Introns		Intergenic region		Total
	Count	Percent	Count	Percent	Count	Percent	Count	Percent		Count	Percent	Count	Percent	Count	Percent	Count	Percent		Count	Percent	Count	Percent	Count	Percent	Count	Percent
AG04449	954	22.2845	367	8.57276	1027	23.9897	1933	45.153	4281	10554	18.1331	4112	7.06493	16180	27.7993	27357	47.0027	58203	1990	10.3285	855	4.43764	5629	29.2158	10793	56.0181	19267
AG04450	183	8.14419	77	3.42679	817	36.3596	1170	52.0694	2247	5545	12.9708	2267	5.30292	13670	31.9766	21268	49.7497	42750	1993	10.3527	845	4.38938	5625	29.2193	10788	56.0386	19251
AG09309	139	9.54015	61	4.18668	490	33.6307	767	52.6424	1457	5351	13.2493	2160	5.34826	12503	30.958	20373	50.4444	40387	1990	10.3533	856	4.45346	5601	29.14	10774	56.0533	19221
AG09319	213	8.45574	104	4.12862	873	34.6566	1329	52.759	2519	6981	14.7671	2745	5.80657	14451	30.5686	23097	48.8577	47274	1989	10.3362	838	4.35483	5633	29.273	10783	56.036	19243
AG10803	255	8.51135	108	3.60481	1081	36.0814	1552	51.8024	2996	5672	14.1344	2133	5.31536	12412	30.9302	19912	49.62	40129	1986	10.3169	843	4.37922	5630	29.2468	10791	56.0571	19250
AoAF	159	9.99371	59	3.70836	553	34.758	820	51.5399	1591	5556	14.6941	2254	5.96123	11511	30.4435	18490	48.9011	37811	1989	10.3335	851	4.42124	5626	29.229	10782	56.0162	19248
BJ	305	10.9555	109	3.91523	955	34.3032	1415	50.8261	2784	7227	15.2349	2719	5.73181	14232	30.0019	23259	49.0313	47437	1989	10.3524	831	4.3252	5623	29.2666	10770	56.0558	19213
CACO2	505	8.82559	196	3.42538	1951	34.0965	3070	53.6526	5722	6099	13.5419	2497	5.54421	13381	29.7105	23061	51.2034	45038	1988	10.3391	853	4.43624	5621	29.2334	10766	55.9913	19228
GM06990	299	8.15603	115	3.13693	1275	34.7791	1977	53.928	3666	5258	13.4517	2145	5.48762	11752	30.0655	19933	50.9952	39088	1991	10.3752	857	4.46587	5582	29.0881	10760	56.0709	19190
GM12801	69	11.1831	16	2.59319	176	28.5251	356	57.6985	617	837	9.80553	335	3.92455	2795	32.7437	4569	53.5262	8536	1959	10.3035	855	4.49692	5550	29.1906	10649	56.009	19013
GM12864	264	12.7475	114	5.50459	645	31.1444	1048	50.6036	2071	5952	14.5203	2424	5.91349	11918	29.0747	20697	50.4916	40991	1993	10.3559	865	4.49467	5618	29.192	10769	55.9574	19245
GM12865	372	8.76738	205	4.83149	1316	31.0158	2350	55.3853	4243	5468	16.933	2139	6.62393	8674	26.8611	16011	49.5819	32292	1981	10.3409	859	4.484	5576	29.1069	10741	56.0683	19157
GM12872	259	13.9849	101	5.45356	514	27.7538	978	52.8078	1852	5752	15.1724	2287	6.03255	10811	28.5168	19061	50.2783	37911	1993	10.3527	858	4.45691	5624	29.2141	10776	55.9763	19251
GM12873	280	14.1058	109	5.49118	576	29.0176	1020	51.3854	1985	6399	14.9492	2568	5.9993	12329	28.8027	21509	50.2488	42805	1994	10.3584	857	4.45195	5614	29.1636	10785	56.026	19250
GM12874	354	11.328	161	5.152	958	30.656	1652	52.864	3125	5703	17.6089	2252	6.95341	8659	26.736	15773	48.7016	32387	1993	10.3959	856	4.46508	5578	29.096	10744	56.043	19171
GM12875	180	9.78793	105	5.70962	603	32.7896	951	51.7129	1839	6001	14.1127	2498	5.87461	12522	29.4483	21501	50.5644	42522	2003	10.3993	853	4.42864	5625	29.2041	10780	55.968	19261
GM12878	140	7.99543	48	2.74129	591	33.7521	972	55.5111	1751	2999	12.9228	1204	5.18809	7025	30.271	11979	51.618	23207	1977	10.3519	855	4.47691	5564	29.1339	10702	56.0373	19098
HAsp	92	9.2	42	4.2	317	31.7	549	54.9	1000	5336	12.9833	2360	5.74223	12952	31.5141	20451	49.7603	41099	1985	10.3133	846	4.39549	5615	29.1734	10801	56.1178	19247
HBMEC	620	11.2278	260	4.70844	1893	34.2811	2749	49.7827	5522	9627	13.5044	3990	5.59701	22398	31.419	35273	49.4796	71288	1992	10.3534	847	4.40229	5616	29.1892	10785	56.0551	19240
HCFaa	134	8.45426	47	2.9653	549	34.6372	855	53.9432	1585	5948	12.7102	2408	5.14563	14868	31.7713	23573	50.3729	46797	1984	10.3033	850	4.41421	5629	29.2324	10793	56.0501	19256
HCPEpiC	1200	15.1726	447	5.65179	2560	32.3682	3702	46.8074	7909	10393	15.3337	4096	6.04317	20638	30.449	32652	48.1742	67779	1995	10.3701	837	4.35076	5625	29.239	10781	56.0401	19238
HEEpiC	280	9.62199	122	4.19244	995	34.1924	1513	51.9931	2910	5930	13.3211	2476	5.56205	13406	30.115	22704	51.0019	44516	1991	10.338	852	4.42391	5621	29.1864	10795	56.0517	19259
HEK293T	538	7.20407	274	3.66899	2288	30.6374	4368	58.4896	7468	8078	11.9023	3565	5.25277	20680	30.4705	35546	52.3744	67869	1994	10.3488	850	4.41146	5627	29.2039	10797	56.0359	19268
Hela	119	6.61111	47	2.61111	597	33.1667	1037	57.6111	1800	3345	13.0004	1364	5.3012	7461	28.9973	13560	52.7011	25730	1980	10.3486	850	4.44259	5577	29.1486	10726	56.0602	19133
HepG2	1013	8.30736	555	4.55142	3741	30.679	6885	56.4622	12194	8121	12.4245	3631	5.55513	19551	29.9114	34060	52.109	65363	1989	10.3395	873	4.53813	5605	29.1366	10770	55.9859	19237
HL60	92	9.4359	28	2.87179	298	30.5641	557	57.1282	975	2443	11.3861	1011	4.71197	6441	30.0196	11561	53.8824	21456	1980	10.3303	858	4.47644	5587	29.1491	10742	56.0442	19167
HMEC	327	9.70614	135	4.00712	1055	31.3149	1852	54.9718	3369	8613	14.6323	3498	5.94261	17151	29.1371	29601	50.288	58863	1989	10.3266	839	4.35595	5627	29.2145	10806	56.103	19261
HMF	123	7.56923	37	2.27692	665	40.9231	800	49.2308	1625	3958	9.96099	1668	4.19781	13601	34.2293	20508	51.6119	39735	1992	10.3626	835	4.34375	5628	29.2774	10768	56.0162	19223
HPAF	209	7.78109	81	3.01564	1084	40.3574	1312	48.8459	2686	6628	12.2337	2726	5.03156	17614	32.5114	27210	50.2233	54178	1987	10.3237	843	4.3799	5636	29.2825	10781	56.0139	19247
HPF	152	7.79088	69	3.53665	713	36.5454	1017	52.1271	1951	5435	12.8743	2239	5.30368	13506	31.9926	21036	49.8294	42216	1991	10.345	842	4.37494	5622	29.2113	10791	56.0688	19246
HRE	209	9.83529	107	5.03529	689	32.4235	1120	52.7059	2125	5821	13.1783	2299	5.20477	13667	30.9411	22384	50.6758	44171	1983	10.3421	834	4.34964	5612	29.2688	10745	56.0394	19174
HRPEpiC	206	7.96289	85	3.28566	909	35.1372	1387	53.6142	2587	5665	11.4516	2413	4.8778	16129	32.6043	25262	51.0663	49469	1990	10.3355	835	4.33676	5631	29.2459	10798	56.0819	19254
HUVEC	357	15.8526	146	6.48313	702	31.1723	1047	46.492	2252	7221	18.2256	2815	7.105	10838	27.3549	18746	47.3145	39620	1990	10.3398	859	4.46327	5608	29.1385	10789	56.0584	19246
K562	428	11.3679	223	5.92297	1183	31.421	1931	51.2882	3765	5844	12.9913	2628	5.84208	13349	29.675	23163	51.4916	44984	1986	10.3239	859	4.46535	5614	29.1833	10778	56.0274	19237
NHEK	325	10.494	166	5.36003	1011	32.6445	1595	51.5015	3097	6591	14.3342	2813	6.11774	13009	28.2921	23568	51.256	45981	1980	10.3146	863	4.49573	5591	29.1259	10762	56.0638	19196
SAEC	453	14.2677	190	5.98425	895	28.189	1637	51.5591	3175	6921	17.1613	2872	7.12143	10870	26.9533	19666	48.7639	40329	1983	10.3287	853	4.44294	5592	29.1265	10771	56.1019	19199
SKNSH	721	14.4142	281	5.61775	1642	32.8269	2358	47.1411	5002	8944	16.9087	3384	6.39746	14820	28.0172	25748	48.6766	52896	1995	10.3609	857	4.45079	5610	29.1353	10793	56.053	19255
WERI	717	8.47117	396	4.67864	2816	33.2703	4535	53.5799	8464	7969	13.1179	3548	5.84043	17984	29.6038	31248	51.4379	60749	1995	10.3604	869	4.51288	5611	29.139	10781	55.9877	19256
Average	348.553	10.4083	152.447	4.37389	1079.03	32.7832	1741.21	52.4346	3321.24	6215.39	13.9431	2540.61	5.68333	13309.4	30.0234	22246.6	50.3502	44312	1988.13	10.3436	851	4.42751	5610.61	29.19	10771.2	56.0389	19220.9
