# Supplementary material for: Comprehensive Identification and Annotation of Cell Type-Specific and Ubiquitous CTCF-Binding Sites in the Human Genome
Source: PLoS One. 2012 Jul 19;7(7):e41374. doi: 10.1371/journal.pone.0041374 (PMC3400636; doi:10.1371/journal.pone.0041374)
Supplement: Table S2 — CTCF-cluster mapping across 38 cell types. (XLS) [file pone.0041374.s020.xls]

## Sheet: K562
Table S2. CTCF-cluster Mapping and Statistic Estimation in K562 cell
CTCF-cluster Mapping and Statistic Estimation
	Total peaks	CTCF Singletons	CTCF clusters					CTCF-6+ clusters
			CTCF-2	CTCF-3	CTCF-4	CTCF-5	CTCF-6
CTCF-cluster	67986	26808	8368	3236	1458	696	354	388
Shuffled CTCF-cluster	67986	41949±149	8707±76	1943±40	466±20	121±10	33±5	15±4
Distinct CTCFs	67986	26808	16736	9708	5832	3480	2124	3298
Shuffled CTCFs	67986	41949±149	17414±152	5830±121	1867±82	606±53	202±34	114±32
Random probability (%)		1	1	0	0	0	0	0
Composition of CTCF-cluster
	Total peaks	CTCF Singletons	CTCF clusters					CTCF-6+ clusters
			CTCF-2	CTCF-3	CTCF-4	CTCF-5	CTCF-6
Unique	3765	1054	1027	648	400	250	164	222
Common	44984	18264	10883	6251	3741	2225	1363	2257
Ubiquitous	19237	7490	4826	2809	1691	1005	597	819
The random probability of CTCF cluster was calculated based on the Shuffled numbers versus the observed numbers in each category of CTCF clusters.We used shuffleBed command in BEDTools [18] with the ""- chrom"" option to permutes the locations of CTCF peaks within human genome (hg19).

## Sheet: AG04449
Table S2. CTCF-cluster Mapping and Statistic Estimation in AG04449 cell
CTCF-cluster Mapping and Statistic Estimation
	Total peaks	CTCF Singletons	CTCF clusters					CTCF-6+ clusters
			CTCF-2	CTCF-3	CTCF-4	CTCF-5	CTCF-6
CTCF-cluster	81751	24883	9066	3996	2061	1150	640	1006
Shuffled CTCF-cluster	81751	46052±165	11099±86	2843±47	777±26	227±14	71±8	38±6
Distinct CTCFs	81751	24883	18132	11988	8244	5750	3840	8914
Shuffled CTCFs	81751	46052±165	22199±173	8530±143	3110±105	1137±72	429±49	290±50
Random probability (%)		1	1	0	0	0	0	0
Composition of CTCF-cluster
	Total peaks	CTCF Singletons	CTCF clusters					CTCF-6+ clusters
			CTCF-2	CTCF-3	CTCF-4	CTCF-5	CTCF-6
Unique	4281	590	959	737	573	388	286	748
Common	58203	17942	12637	8419	5878	4073	2754	6500
Ubiquitous	19267	6351	4536	2832	1793	1289	800	1666
The random probability of CTCF cluster was calculated based on the Shuffled numbers versus the observed numbers in each category of CTCF clusters.We used shuffleBed command in BEDTools [18] with the ""- chrom"" option to permutes the locations of CTCF peaks within human genome (hg19).

## Sheet: AG04450
Table S2. CTCF-cluster Mapping and Statistic Estimation in AG04450 cell
CTCF-cluster Mapping and Statistic Estimation
	Total peaks	CTCF Singletons	CTCF clusters					CTCF-6+ clusters
			CTCF-2	CTCF-3	CTCF-4	CTCF-5	CTCF-6
CTCF-cluster	64248	26471	8348	3118	1323	578	253	245
Shuffled CTCF-cluster	64248	41176±148	8060±72	1653±36	356±18	80±8	19±4	6±2
Distinct CTCFs	64248	26471	16696	9354	5292	2890	1518	2027
Shuffled CTCFs	64248	41176±148	16120±145	4961±110	1424±72	402±44	115±26	48±20
Random probability (%)		1	0	0	0	0	0	0
Composition of CTCF-cluster
	Total peaks	CTCF Singletons	CTCF clusters					CTCF-6+ clusters
			CTCF-2	CTCF-3	CTCF-4	CTCF-5	CTCF-6
Unique	2247	565	748	416	251	147	58	62
Common	42750	18243	10770	6037	3410	1869	991	1430
Ubiquitous	19251	7663	5178	2901	1631	874	469	535
The random probability of CTCF cluster was calculated based on the Shuffled numbers versus the observed numbers in each category of CTCF clusters.We used shuffleBed command in BEDTools [18] with the ""- chrom"" option to permutes the locations of CTCF peaks within human genome (hg19).

## Sheet: AG09309
Table S2. CTCF-cluster Mapping and Statistic Estimation in AG09309 cell
CTCF-cluster Mapping and Statistic Estimation
	Total peaks	CTCF Singletons	CTCF clusters					CTCF-6+ clusters
			CTCF-2	CTCF-3	CTCF-4	CTCF-5	CTCF-6
CTCF-cluster	61065	26802	7952	2838	1084	523	227	181
Shuffled CTCF-cluster	61065	40041+143	7470+70	1465+34	304+16	66+7	15+3	5+2
Distinct CTCFs	61065	26802	15904	8514	4336	2615	1362	1532
Shuffled CTCFs	61065	40041+143	14941+141	4396+104	1216+66	334+39	94+23	40+19
Random probability (%)		1	0	0	0	0	0	0
Composition of CTCF-cluster
	Total peaks	CTCF Singletons	CTCF clusters					CTCF-6+ clusters
			CTCF-2	CTCF-3	CTCF-4	CTCF-5	CTCF-6
Unique	1457	547	418	230	120	69	37	36
Common	40387	17939	10398	5520	2791	1723	920	1096
Ubiquitous	19221	8316	5088	2764	1425	823	405	400
The random probability of CTCF cluster was calculated based on the Shuffled numbers versus the observed numbers in each category of CTCF clusters.We used shuffleBed command in BEDTools [18] with the ""- chrom"" option to permutes the locations of CTCF peaks within human genome (hg19).

## Sheet: AG09319
Table S2. CTCF-cluster Mapping and Statistic Estimation in AG09319 cell
CTCF-cluster Mapping and Statistic Estimation
	Total peaks	CTCF Singletons	CTCF clusters					CTCF-6+ clusters
			CTCF-2	CTCF-3	CTCF-4	CTCF-5	CTCF-6
CTCF-cluster	69036	26757	8669	3405	1509	663	352	384
Shuffled CTCF-cluster	69036	42889±153	8899±76	1934±40	442±20	106±10	27±5	10±3
Distinct CTCFs	69036	26757	17338	10215	6036	3315	2112	3263
Shuffled CTCFs	69036	42889±153	17799±153	5803±120	1768±80	532±50	163±31	77±26
Random probability (%)		1	0.9981	0	0	0	0	0
Composition of CTCF-cluster
	Total peaks	CTCF Singletons	CTCF clusters					CTCF-6+ clusters
			CTCF-2	CTCF-3	CTCF-4	CTCF-5	CTCF-6
Unique	2519	644	762	442	281	142	92	156
Common	47274	18657	11639	6887	4034	2237	1504	2316
Ubiquitous	19243	7456	4937	2886	1721	936	516	791
The random probability of CTCF cluster was calculated based on the Shuffled numbers versus the observed numbers in each category of CTCF clusters.We used shuffleBed command in BEDTools [18] with the ""- chrom"" option to permutes the locations of CTCF peaks within human genome (hg19).

## Sheet: AG10803
Table S2. CTCF-cluster Mapping and Statistic Estimation in AG10803 cell
CTCF-cluster Mapping and Statistic Estimation
	Total peaks	CTCF Singletons	CTCF clusters					CTCF-6+ clusters
			CTCF-2	CTCF-3	CTCF-4	CTCF-5	CTCF-6
CTCF-cluster	62375	25395	8101	2986	1292	542	266	276
Shuffled CTCF-cluster	62375	40448±146	7724±70	1551±36	327±17	73±8	17±4	5±2
Distinct CTCFs	62375	25395	16202	8958	5168	2710	1596	2346
Shuffled CTCFs	62375	40448±146	15449±141	4654±109	1311±69	365±41	103±24	43±20
Random probability (%)		1	0	0	0	0	0	0
Composition of CTCF-cluster
	Total peaks	CTCF Singletons	CTCF clusters					CTCF-6+ clusters
			CTCF-2	CTCF-3	CTCF-4	CTCF-5	CTCF-6
Unique	2996	955	971	499	273	112	69	117
Common	40129	16468	10129	5697	3282	1831	1097	1625
Ubiquitous	19250	7972	5102	2762	1613	767	430	604
The random probability of CTCF cluster was calculated based on the Shuffled numbers versus the observed numbers in each category of CTCF clusters.We used shuffleBed command in BEDTools [18] with the ""- chrom"" option to permutes the locations of CTCF peaks within human genome (hg19).

## Sheet: AoAF
Table S2. CTCF-cluster Mapping and Statistic Estimation in AoAF cell
CTCF-cluster Mapping and Statistic Estimation
	Total peaks	CTCF Singletons	CTCF clusters					CTCF-6+ clusters
			CTCF-2	CTCF-3	CTCF-4	CTCF-5	CTCF-6
CTCF-cluster	58650	24737	7664	2796	1127	505	244	209
Shuffled CTCF-cluster	58650	39066±142	7047±69	1338±33	269±15	57±7	13±3	4±2
Distinct CTCFs	58650	24737	15328	8388	4508	2525	1464	1700
Shuffled CTCFs	58650	39066±142	14094±138	4016±100	1076±62	287±36	78±21	31±17
Random probability (%)		1	0	0	0	0	0	0
Composition of CTCF-cluster
	Total peaks	CTCF Singletons	CTCF clusters					CTCF-6+ clusters
			CTCF-2	CTCF-3	CTCF-4	CTCF-5	CTCF-6
Unique	1591	482	486	295	160	62	53	53
Common	37811	16000	9729	5312	2936	1678	980	1176
Ubiquitous	19248	8255	5113	2781	1412	785	431	471
The random probability of CTCF cluster was calculated based on the Shuffled numbers versus the observed numbers in each category of CTCF clusters.We used shuffleBed command in BEDTools [18] with the ""- chrom"" option to permutes the locations of CTCF peaks within human genome (hg19).

## Sheet: BJ
Table S2. CTCF-cluster Mapping and Statistic Estimation in BJ cell
CTCF-cluster Mapping and Statistic Estimation
	Total peaks	CTCF Singletons	CTCF clusters					CTCF-6+ clusters
			CTCF-2	CTCF-3	CTCF-4	CTCF-5	CTCF-6
CTCF-cluster	69434	25876	8618	3435	1503	767	372	467
Shuffled CTCF-cluster	69434	42764±153	8971±76	1991±40	468±20	117±10	31±5	13±3
Distinct CTCFs	69434	25876	17236	10305	6012	3835	2232	3938
Shuffled CTCFs	69434	42764±153	17943±152	5975±121	1875±82	587±52	189±33	97±29
Random probability (%)		1	1	0	0	0	0	0
Composition of CTCF-cluster
	Total peaks	CTCF Singletons	CTCF clusters					CTCF-6+ clusters
			CTCF-2	CTCF-3	CTCF-4	CTCF-5	CTCF-6
Unique	2784	591	832	522	313	220	111	195
Common	47437	17968	11533	6917	4114	2560	1554	2791
Ubiquitous	19213	7317	4871	2866	1585	1055	567	952
The random probability of CTCF cluster was calculated based on the Shuffled numbers versus the observed numbers in each category of CTCF clusters.We used shuffleBed command in BEDTools [18] with the ""- chrom"" option to permutes the locations of CTCF peaks within human genome (hg19).

## Sheet: CACO2
Table S2. CTCF-cluster Mapping and Statistic Estimation in CACO2 cell
CTCF-cluster Mapping and Statistic Estimation
	Total peaks	CTCF Singletons	CTCF clusters					CTCF-6+ clusters
			CTCF-2	CTCF-3	CTCF-4	CTCF-5	CTCF-6
CTCF-cluster	69988	30941	8875	3186	1314	572	265	248
Shuffled CTCF-cluster	69988	42755±152	9070±76	2054±40	495±21	127±11	34±5	13±3
Distinct CTCFs	69988	30941	17750	9558	5256	2860	1590	2033
Shuffled CTCFs	69988	42755±152	18141±153	6163±122	1983±84	635±55	206±35	102±29
Random probability (%)		1	0.993201	0	0	0	0	0
Composition of CTCF-cluster
	Total peaks	CTCF Singletons	CTCF clusters					CTCF-6+ clusters
			CTCF-2	CTCF-3	CTCF-4	CTCF-5	CTCF-6
Unique	5722	2609	1462	725	422	194	135	175
Common	45038	20314	11177	6030	3283	1828	1037	1369
Ubiquitous	19228	8018	5111	2803	1551	838	418	489
The random probability of CTCF cluster was calculated based on the Shuffled numbers versus the observed numbers in each category of CTCF clusters.We used shuffleBed command in BEDTools [18] with the ""- chrom"" option to permutes the locations of CTCF peaks within human genome (hg19).

## Sheet: GM06990
Table S2. CTCF-cluster Mapping and Statistic Estimation in GM06990 cell
CTCF-cluster Mapping and Statistic Estimation
	Total peaks	CTCF Singletons	CTCF clusters					CTCF-6+ clusters
			CTCF-2	CTCF-3	CTCF-4	CTCF-5	CTCF-6
CTCF-cluster	61944	26676	7942	2916	1180	503	260	222
Shuffled CTCF-cluster	61944	40298±143	7623±71	1523±35	324±17	74±8	18±4	6±2
Distinct CTCFs	61944	26676	15884	8748	4720	2515	1560	1841
Shuffled CTCFs	61944	40298±143	15246±142	4571±106	1297±69	370±42	109±25	49±21
Random probability (%)		1	0	0	0	0	0	0
Composition of CTCF-cluster
	Total peaks	CTCF Singletons	CTCF clusters					CTCF-6+ clusters
			CTCF-2	CTCF-3	CTCF-4	CTCF-5	CTCF-6
Unique	3666	1357	1066	574	316	146	91	116
Common	39088	17225	9867	5367	2838	1585	1002	1204
Ubiquitous	19190	8094	4951	2807	1566	784	467	521
The random probability of CTCF cluster was calculated based on the Shuffled numbers versus the observed numbers in each category of CTCF clusters.We used shuffleBed command in BEDTools [18] with the ""- chrom"" option to permutes the locations of CTCF peaks within human genome (hg19).

[truncated: 28 more sheets: GM12801, GM12864, GM12865, GM12872, GM12873, GM12874, GM12875, GM12878, HAsp, HBMEC, HCFaa, HCPEpiC, HEEpiC, HEK293T, Hela, HepG2, HL60, HMEC, HMF, HPAF …]
