# Supplementary material for: Comprehensive Identification and Annotation of Cell Type-Specific and Ubiquitous CTCF-Binding Sites in the Human Genome
Source: PLoS One. 2012 Jul 19;7(7):e41374. doi: 10.1371/journal.pone.0041374 (PMC3400636; doi:10.1371/journal.pone.0041374)
Supplement: Table S3 — Statistical analysis of conservation scores and GC content of each CTCF-binding site type across 38 cell types. (A) The mean values of conservation scores and GC content for each CTCF-binding site type across 38 cell types. (B) Analysis of the statistical significance between each CTCF-binding site across 38 cell types and Unoccupied sites, and between cell type-specific and ubiquitous CTCF-binding sites. (XLSX) [file pone.0041374.s021.xlsx]

## Sheet: Table S3A
Table S3A. Statistical analysis of conservation scores and GC contents of different kinds of CTCF binding sites across 38 cell types
	phastCons46way			phyloP46way			GC content
	All	placental	primates	All	placental	primate
Unoccupied	0.1143±0.1505	0.1026±0.1485	0.1445±0.1439	0.1127±0.3319	0.0449±0.2577	0.0541±0.0975	46.9558±10.6118
Total	0.1272±0.1985	0.1172±0.1932	0.1570±0.1906	0.1310±0.4528	0.0535±0.3387	0.0598±0.1178	51.3398±10.1029
Unique	0.1177±0.2056	0.107±0.1985	0.1488±0.1978	0.1179±0.4677	0.0426±0.3481	0.0566±0.1229	50.6744±9.9209
Common	0.1353±0.1982	0.1255±0.1940	0.1647±0.1887	0.1464±0.4508	0.0652±0.3374	0.0631±0.1148	51.9951±10.2337
Ubiquitous	0.1285±0.1427	0.1223±0.1422	0.1531±0.1501	0.1013±0.3553	0.0363±0.2784	0.0552±0.1035	50.7561±9.9708

## Sheet: Table S3B
Table S3B. Statistical analysis of conservation scores and GC contents of different kinds of CTCF binding sites across 38 cell types
	phastCons46way			phyloP46way			GC content
	All	placental	primates	All	placental	primate
Total vs. Unoccupied	0	0	0	0	0	2.00435e-06	0
Unique vs. Unoccupied	0	0	0	0	0	9.51194e-17	0
Common vs. Unoccupied	0	0	1.96756e-261	0	1.8404e-143	1.27973e-45	0
Ubiquitous vs. Unoccupied	4.52369e-124	5.18283e-247	0.124093	5.41084e-78	2.11877e-43	0.000185273	0
Unique vs. Ubiquitous	0	0	3.06115e-299	6.01593e-28	3.59497e-19	9.46125e-07	0.0339914
