# Supplementary material for: Comprehensive Identification and Annotation of Cell Type-Specific and Ubiquitous CTCF-Binding Sites in the Human Genome
Source: PLoS One. 2012 Jul 19;7(7):e41374. doi: 10.1371/journal.pone.0041374 (PMC3400636; doi:10.1371/journal.pone.0041374)
Supplement: Table S4 — Correlations between CTCF-binding sites and gene densities, enhancers, and promoters across cell types. (A) Correlation between CTCF-binding sites and gene density across 38 cell types. (B) Correlation between CTCF-binding sites and gene density along each chromosome across 38 cell types. (C) Correlation between CTCF-binding sites and densities of enhancers and promoters across five cell types. (XLSX) [file pone.0041374.s022.xlsx]

## Sheet: Table S4A
Table S4A. Correlations between CTCF binding sites and gene density across 38 cell types
	total			unique			common			ubiquitous
	correlation	correlation^2	p-value	correlation	correlation^2	p-value	correlation	correlation^2	p-value	correlation	correlation^2	p-value
AG04449	0.941409	0.886251	2.223e-11	0.941545	0.886507	2.17074e-11	0.935542	0.875238	5.89916e-11	0.939809	0.883242	2.92874e-11
AG04450	0.904413	0.817963	3.21258e-09	0.209358	0.0438308	0.337692	0.884929	0.783099	2.06256e-08	0.939802	0.883227	2.93259e-11
AG09309	0.937796	0.879461	4.10066e-11	0.790088	0.624239	7.30814e-06	0.930265	0.865393	1.31636e-10	0.940415	0.884381	2.6406e-11
AG09319	0.930035	0.864965	1.36127e-10	0.61061	0.372844	0.00197099	0.92457	0.854829	2.92619e-10	0.938767	0.881284	3.49083e-11
AG10803	0.908139	0.824717	2.152e-09	0.28643	0.0820421	0.185162	0.898664	0.807597	5.77949e-09	0.938726	0.881206	3.51533e-11
AoAF	0.943627	0.890432	1.49708e-11	0.820463	0.673159	1.63443e-06	0.942389	0.888097	1.87036e-11	0.938654	0.881071	3.5576e-11
BJ	0.928265	0.861676	1.75559e-10	0.77046	0.593608	1.70093e-05	0.923649	0.853127	3.31013e-10	0.939394	0.882462	3.14209e-11
CACO2	0.783267	0.613507	9.89703e-06	0.306126	0.0937134	0.155424	0.727984	0.529961	8.23122e-05	0.939336	0.882353	3.17298e-11
GM06990	0.955464	0.912911	1.3282e-12	0.905692	0.820278	2.80502e-09	0.96132	0.924136	3.10206e-13	0.940632	0.884788	2.54414e-11
GM12801	0.906184	0.821169	2.6611e-09	0.304754	0.092875	0.157379	0.6539	0.427586	0.000713751	0.941247	0.885946	2.28684e-11
GM12864	0.944495	0.89207	1.27696e-11	0.846879	0.717204	3.47642e-07	0.945623	0.894203	1.03448e-11	0.939524	0.882706	3.07384e-11
GM12865	0.943647	0.890469	1.49175e-11	0.796032	0.633667	5.56001e-06	0.947078	0.896957	7.83114e-12	0.940642	0.884807	2.53968e-11
GM12872	0.943195	0.889617	1.61887e-11	0.900716	0.811289	4.70587e-09	0.939881	0.883376	2.89337e-11	0.939484	0.88263	3.09484e-11
GM12873	0.968053	0.937127	4.28913e-14	0.961157	0.923822	3.23992e-13	0.97252	0.945796	8.9952e-15	0.939846	0.88331	2.91063e-11
GM12874	0.951084	0.90456	3.48855e-12	0.85139	0.724866	2.59321e-07	0.954933	0.911896	1.50082e-12	0.941326	0.886094	2.25553e-11
GM12875	0.949517	0.901582	4.82378e-12	0.727466	0.529207	8.37605e-05	0.946255	0.895398	9.17574e-12	0.940124	0.883834	2.77561e-11
GM12878	0.958055	0.917868	7.16062e-13	0.944699	0.892456	1.22965e-11	0.960254	0.922087	4.10767e-13	0.940531	0.884599	2.58865e-11
HAsp	0.937098	0.878152	4.59613e-11	0.624977	0.390596	0.00143031	0.924239	0.854218	3.05911e-10	0.939156	0.882013	3.27095e-11
HBMEC	0.926367	0.858156	2.28995e-10	0.816678	0.666963	1.99884e-06	0.919484	0.845452	5.67419e-10	0.939234	0.882161	3.22799e-11
HCFaa	0.927467	0.860195	1.96479e-10	0.492661	0.242715	0.0169242	0.914781	0.836824	1.00834e-09	0.939379	0.882433	3.15022e-11
HCPEpiC	0.931742	0.868143	1.05834e-10	0.858707	0.737377	1.57873e-07	0.928599	0.862296	1.67414e-10	0.939307	0.882297	3.1889e-11
HEEpiC	0.919168	0.84487	5.90435e-10	0.67421	0.454559	0.000419066	0.904	0.817216	3.35514e-09	0.939915	0.88344	2.87675e-11
HEK293T	0.927753	0.860725	1.8875e-10	0.713946	0.509719	0.00013031	0.904165	0.817515	3.29743e-09	0.939597	0.882842	3.0364e-11
Hela	0.925681	0.856885	2.5164e-10	0.357625	0.127896	0.093856	0.894446	0.800034	8.70056e-09	0.939647	0.882937	3.01049e-11
HepG2	0.780204	0.608719	1.13016e-05	0.415068	0.172281	0.048899	0.801308	0.642094	4.32947e-06	0.939858	0.883333	2.90475e-11
HL60	0.937718	0.879316	4.153e-11	0.331608	0.109964	0.122161	0.902329	0.814198	3.99122e-09	0.94024	0.884052	2.72114e-11
HMEC	0.939881	0.883375	2.89352e-11	0.838875	0.703712	5.71906e-07	0.93392	0.872206	7.60293e-11	0.940125	0.883834	2.77551e-11
HMF	0.880021	0.774437	3.1271e-08	-0.0552966	0.00305772	0.802127	0.781258	0.610363	1.07999e-05	0.940114	0.883814	2.78073e-11
HPAF	0.895966	0.802755	7.52316e-09	-0.223756	0.0500669	0.30473	0.879942	0.774298	3.14759e-08	0.939635	0.882914	3.01675e-11
HPF	0.907296	0.823186	2.35968e-09	0.190292	0.0362109	0.384464	0.884905	0.783058	2.06673e-08	0.939004	0.881729	3.35521e-11
HRE	0.934202	0.872734	7.27742e-11	0.705168	0.497262	0.000171389	0.924736	0.855138	2.8611e-10	0.94004	0.883675	2.8159e-11
HRPEpiC	0.905615	0.820138	2.82837e-09	-0.163242	0.0266479	0.456734	0.878117	0.771089	3.65735e-08	0.939939	0.883485	2.8649e-11
HUVEC	0.955307	0.912612	1.37705e-12	0.933131	0.870734	8.58139e-11	0.95797	0.917706	7.31089e-13	0.939867	0.883349	2.90042e-11
K562	0.946968	0.896749	7.99936e-12	0.675289	0.456015	0.000406921	0.939042	0.881801	3.33381e-11	0.939703	0.883042	2.98195e-11
NHEK	0.951399	0.90516	3.2642e-12	0.869273	0.755636	7.32778e-08	0.948528	0.899706	5.88728e-12	0.941332	0.886106	2.25302e-11
SAEC	0.944632	0.89233	1.24498e-11	0.913436	0.834365	1.18144e-09	0.942253	0.887841	1.91609e-11	0.93957	0.882791	3.05034e-11
SKNSH	0.926558	0.85851	2.23024e-10	0.624886	0.390482	0.00143329	0.925576	0.856692	2.55264e-10	0.940026	0.883648	2.82283e-11
WERI	0.879845	0.774128	3.17289e-08	0.428813	0.183881	0.0411836	0.871953	0.760302	5.96844e-08	0.938868	0.881474	3.43236e-11
Average	0.923093	0.853622	5.60128e-07	0.605163	0.46673	0.0819162	0.905561	0.82418	2.13524e-05	0.939811	0.883245	2.94442e-11

## Sheet: Table S4B
Table S4B. Correlations between CTCF binding sites and gene density along each chromosome across 38 cell types
	chr1			chr2			chr3			chr4			chr5			chr6			chr7			chr8			chr9			chr10			chr11			chr12			chr13			chr14			chr15			chr16			chr17
	correlation	correlation^2	p-value	correlation	correlation^2	p-value	correlation	correlation^2	p-value	correlation	correlation^2	p-value	correlation	correlation^2	p-value	correlation	correlation^2	p-value	correlation	correlation^2	p-value	correlation	correlation^2	p-value	correlation	correlation^2	p-value	correlation	correlation^2	p-value	correlation	correlation^2	p-value	correlation	correlation^2	p-value	correlation	correlation^2	p-value	correlation	correlation^2	p-value	correlation	correlation^2	p-value	correlation	correlation^2	p-value	correlation
AG04449	0.785163	0.61648	2.30123e-27	0.750336	0.563005	2.58276e-23	0.86903	0.755213	1.03619e-31	0.784583	0.615571	3.18551e-21	0.772821	0.597253	2.87561e-19	0.820059	0.672496	4.58469e-22	0.774693	0.60015	3.43423e-17	0.806283	0.650092	4.41053e-18	0.899589	0.809261	1.58722e-26	0.710841	0.505296	1.11202e-11	0.874542	0.764824	2.00812e-22	0.893508	0.798356	2.75504e-24	0.8562	0.733079	1.06996e-17	0.809686	0.655592	1.23966e-13	0.652015	0.425123	1.6396e-07	0.857053	0.734541	2.94675e-14	0.838619
AG04450	0.767488	0.589038	1.64978e-25	0.710955	0.505458	4.55402e-20	0.78658	0.618708	3.07925e-22	0.736176	0.541954	1.27704e-17	0.725613	0.526514	4.09556e-16	0.767436	0.588959	6.81082e-18	0.732176	0.536082	1.19269e-14	0.709953	0.504033	1.41658e-12	0.843951	0.712253	2.44362e-20	0.698071	0.487303	3.67738e-11	0.818327	0.669659	1.58583e-17	0.887627	0.787882	1.43749e-23	0.816052	0.665941	5.99161e-15	0.820545	0.673293	3.10477e-14	0.624603	0.390129	7.47143e-07	0.792446	0.62797	5.32181e-11	0.799997
AG09309	0.776819	0.603447	1.81573e-26	0.727898	0.529835	2.14434e-21	0.782851	0.612856	6.52552e-22	0.747508	0.558768	2.16991e-18	0.783086	0.613223	4.69087e-20	0.778166	0.605543	1.19183e-18	0.780719	0.609521	1.3517e-17	0.714461	0.510455	8.80774e-13	0.850364	0.723119	6.42855e-21	0.713201	0.508656	8.85266e-12	0.837402	0.701243	5.62875e-19	0.864802	0.747882	4.0443e-21	0.864333	0.747072	2.3476e-18	0.834733	0.696779	4.39142e-15	0.633095	0.400809	4.74489e-07	0.820352	0.672977	3.01981e-12	0.839078
AG09319	0.780381	0.608994	7.60083e-27	0.724169	0.52442	4.28386e-21	0.795319	0.632532	4.98843e-23	0.764249	0.584077	1.32265e-19	0.754835	0.569776	5.54702e-18	0.773672	0.598569	2.50198e-18	0.759073	0.576192	3.38768e-16	0.75532	0.570509	7.51057e-15	0.844797	0.713682	2.05616e-20	0.697974	0.487167	3.71015e-11	0.858389	0.736831	8.36253e-21	0.891198	0.794235	5.33059e-24	0.858257	0.736606	7.35561e-18	0.801966	0.643149	3.14774e-13	0.647979	0.419877	2.0694e-07	0.815081	0.664356	5.38544e-12	0.840382
AG10803	0.786383	0.618399	1.68788e-27	0.701657	0.492323	0	0.807885	0.652678	3.10073e-24	0.734276	0.539162	1.70355e-17	0.777334	0.604248	1.31114e-19	0.767929	0.589714	6.30038e-18	0.719118	0.517131	5.78248e-14	0.710755	0.505173	1.30259e-12	0.850386	0.723156	6.39939e-21	0.700086	0.490121	3.0576e-11	0.843357	0.711251	1.81604e-19	0.862481	0.743874	6.77032e-21	0.847911	0.718953	4.57617e-17	0.836357	0.699493	3.46964e-15	0.624328	0.389786	7.58028e-07	0.794711	0.631566	4.28653e-11	0.831821
AoAF	0.784499	0.615439	2.72112e-27	0.72711	0.528689	2.48406e-21	0.809358	0.655061	2.20913e-24	0.736953	0.543099	1.13418e-17	0.745905	0.556374	2.19725e-17	0.782889	0.612915	5.36483e-19	0.740714	0.548658	4.03849e-15	0.730597	0.533771	1.48819e-13	0.881557	0.777142	3.47483e-24	0.700449	0.490629	2.95718e-11	0.853311	0.72814	2.45727e-20	0.894666	0.800428	1.96691e-24	0.850678	0.723653	2.84479e-17	0.829778	0.688531	8.87343e-15	0.611008	0.373331	1.50358e-06	0.841501	0.708125	2.41673e-13	0.867786
BJ	0.793611	0.629819	2.58195e-28	0.743932	0.553435	9.55376e-23	0.825431	0.681336	4.46511e-26	0.769241	0.591731	5.48988e-20	0.775134	0.600833	1.9271e-19	0.822196	0.676006	2.9088e-22	0.787482	0.620128	4.5799e-18	0.77998	0.608368	2.62773e-16	0.867775	0.753033	1.22063e-22	0.702805	0.493935	2.37784e-11	0.872246	0.760812	3.5179e-22	0.890608	0.793183	6.29525e-24	0.876208	0.76774	2.12988e-19	0.821793	0.675343	2.63231e-14	0.637175	0.405992	3.79619e-07	0.845841	0.715446	1.37528e-13	0.840759
CACO2	0.761531	0.579929	6.40118e-25	0.744926	0.554914	7.81901e-23	0.839429	0.704642	1.06304e-27	0.767462	0.588998	7.52875e-20	0.735749	0.541326	9.82329e-17	0.781089	0.610099	7.28967e-19	0.775883	0.601994	2.86326e-17	0.780457	0.609113	2.4523e-16	0.897774	0.805999	2.85482e-26	0.671687	0.451164	3.61005e-10	0.810066	0.656207	5.97775e-17	0.8847	0.782694	3.16255e-23	0.791139	0.6259	1.4687e-13	0.837319	0.701104	3.01386e-15	0.621816	0.386655	8.64663e-07	0.749381	0.561571	2.07838e-09	0.696857
GM06990	0.789795	0.623776	7.02177e-28	0.755664	0.571028	8.43756e-24	0.846875	0.717198	1.25416e-28	0.774357	0.599629	2.17799e-20	0.792773	0.628488	7.72458e-21	0.798144	0.637034	3.53157e-20	0.793206	0.629176	1.77624e-18	0.745732	0.556116	2.49073e-14	0.887503	0.787661	6.51108e-25	0.699914	0.48988	3.10628e-11	0.883851	0.781192	1.83838e-23	0.889164	0.790612	9.41956e-24	0.849469	0.721597	3.50585e-17	0.798967	0.638348	4.47121e-13	0.629531	0.396309	5.75051e-07	0.807056	0.651339	1.25542e-11	0.828609
GM12801	0.761951	0.58057	5.82482e-25	0.733681	0.538287	7.16553e-22	0.835853	0.69865	2.85561e-27	0.661367	0.437407	2.22489e-13	0.722317	0.521741	6.42728e-16	0.792212	0.627599	1.0451e-19	0.709035	0.502731	1.84368e-13	0.568988	0.323747	1.22767e-07	0.848791	0.720447	8.97094e-21	0.659541	0.434995	9.57341e-10	0.83136	0.691159	1.69502e-18	0.869006	0.755172	1.55135e-21	0.799002	0.638404	5.61644e-14	0.845049	0.714109	9.39794e-16	0.609511	0.371504	1.62069e-06	0.773211	0.597856	3.01794e-10	0.773214
GM12864	0.796293	0.634083	1.26205e-28	0.771028	0.594485	2.83407e-25	0.857727	0.735696	4.50177e-30	0.780361	0.608963	7.13357e-21	0.788324	0.621455	1.78924e-20	0.80347	0.645564	1.29236e-20	0.809589	0.655434	9.9323e-20	0.749366	0.56155	1.5912e-14	0.897724	0.805909	2.9007e-26	0.721046	0.519907	4.07921e-12	0.860687	0.740781	5.06362e-21	0.901077	0.81194	2.83286e-25	0.85008	0.722635	3.1554e-17	0.786094	0.617944	1.8916e-12	0.623658	0.388949	7.85207e-07	0.820408	0.67307	3.00096e-12	0.84546
GM12865	0.801887	0.643022	2.73845e-29	0.768244	0.590198	5.34485e-25	0.873212	0.762499	2.34641e-32	0.790083	0.624232	1.08419e-21	0.771682	0.595493	3.49627e-19	0.828584	0.686552	7.19172e-23	0.791563	0.626571	2.33849e-18	0.798507	0.637613	1.57193e-17	0.887634	0.787894	6.26862e-25	0.715393	0.511787	7.14807e-12	0.883737	0.780992	1.89503e-23	0.887459	0.787583	1.50523e-23	0.860368	0.740234	4.97681e-18	0.8059	0.649475	1.96799e-13	0.623523	0.388781	7.90804e-07	0.832196	0.69255	7.66401e-13	0.823376
GM12872	0.807079	0.651376	6.34308e-30	0.773529	0.598347	1.59099e-25	0.866586	0.750971	2.41094e-31	0.788689	0.62203	1.42928e-21	0.798578	0.637727	2.50119e-21	0.811854	0.659108	2.49107e-21	0.795823	0.633334	1.1406e-18	0.764112	0.583867	2.3816e-15	0.895512	0.801943	5.84345e-26	0.710733	0.505141	1.12369e-11	0.884053	0.78155	1.74148e-23	0.892764	0.797027	3.41314e-24	0.848737	0.720354	3.97471e-17	0.818927	0.670641	3.83825e-14	0.635164	0.403433	4.23904e-07	0.838252	0.702667	3.64603e-13	0.838264
GM12873	0.807832	0.652593	5.11126e-30	0.770293	0.593351	3.35397e-25	0.855648	0.732133	8.69774e-30	0.800936	0.641498	1.17287e-22	0.791948	0.627182	9.03945e-21	0.830998	0.690558	4.17819e-23	0.816718	0.667028	2.59202e-20	0.787428	0.620043	8.75954e-17	0.897013	0.804632	3.64e-26	0.727138	0.52873	2.1943e-12	0.890036	0.792165	3.34339e-24	0.89045	0.792901	6.58157e-24	0.890011	0.792119	9.40546e-21	0.78738	0.619968	1.64511e-12	0.648351	0.420359	2.02575e-07	0.834091	0.695707	6.09406e-13	0.840026
GM12874	0.803943	0.646325	1.54231e-29	0.762714	0.581733	1.83568e-24	0.89044	0.792883	2.81207e-35	0.782366	0.612097	4.87521e-21	0.80659	0.650587	4.95958e-22	0.786237	0.618168	3.00966e-19	0.791069	0.625791	2.53843e-18	0.785035	0.61628	1.25264e-16	0.886145	0.785253	9.62197e-25	0.76372	0.583269	3.61732e-14	0.886524	0.785925	8.90846e-24	0.896954	0.804527	9.99624e-25	0.867068	0.751807	1.37885e-18	0.77719	0.604025	4.84801e-12	0.640004	0.409606	3.24585e-07	0.843902	0.712171	1.77292e-13	0.825906
GM12875	0.794466	0.631176	2.05766e-28	0.774317	0.599567	1.3242e-25	0.837482	0.701376	1.82619e-27	0.757652	0.574037	4.09208e-19	0.791608	0.626643	9.64321e-21	0.815386	0.664854	1.21467e-21	0.806104	0.649803	1.87671e-19	0.771228	0.594792	9.05898e-16	0.879535	0.773582	6.01666e-24	0.716917	0.51397	6.15297e-12	0.882462	0.77874	2.65975e-23	0.895403	0.801747	1.58428e-24	0.845651	0.715125	6.70024e-17	0.787866	0.620733	1.56022e-12	0.630154	0.397094	5.56135e-07	0.820178	0.672693	3.07878e-12	0.836353
GM12878	0.808877	0.654282	3.78283e-30	0.746017	0.556542	6.26688e-23	0.856527	0.733638	6.59206e-30	0.755192	0.570315	6.17853e-19	0.776911	0.603591	1.41238e-19	0.814755	0.663826	1.38241e-21	0.797035	0.635265	9.27006e-19	0.764033	0.583746	2.40687e-15	0.883848	0.781187	1.84247e-24	0.687318	0.472406	9.60262e-11	0.86653	0.750875	1.3565e-21	0.907343	0.823272	3.73326e-26	0.840022	0.705637	1.68768e-16	0.803926	0.646297	2.49423e-13	0.622742	0.387807	8.23831e-07	0.82885	0.686993	1.14092e-12	0.805621
HAsp	0.771853	0.595758	5.95262e-26	0.721686	0.520831	6.74837e-21	0.819801	0.672074	1.82984e-25	0.803561	0.64571	6.70838e-23	0.74489	0.554861	2.55995e-17	0.792605	0.628223	9.73589e-20	0.733607	0.538179	9.97654e-15	0.751078	0.564118	1.28508e-14	0.860211	0.739963	7.2931e-22	0.702241	0.493143	2.50567e-11	0.85464	0.73041	1.86046e-20	0.862512	0.743926	6.72515e-21	0.829632	0.68829	8.48656e-16	0.843999	0.712334	1.10511e-15	0.620511	0.385033	9.25434e-07	0.816405	0.666516	4.66522e-12	0.826906
HBMEC	0.75642	0.572171	1.98566e-24	0.709569	0.503488	5.79149e-20	0.804939	0.647927	6.0553e-24	0.765355	0.585768	1.09065e-19	0.742449	0.55123	3.68644e-17	0.760192	0.577892	2.0978e-17	0.741745	0.550186	3.53341e-15	0.744703	0.554583	2.82354e-14	0.858532	0.737077	1.06936e-21	0.725511	0.526366	2.59368e-12	0.841379	0.707919	2.65796e-19	0.864199	0.74684	4.62781e-21	0.817692	0.668621	4.77293e-15	0.796842	0.634958	5.71333e-13	0.62236	0.387331	8.40466e-07	0.807938	0.652764	1.14613e-11	0.804534
HCFaa	0.789847	0.623858	6.92803e-28	0.711874	0.506765	3.88051e-20	0.795405	0.63267	4.89705e-23	0.798294	0.637273	2.04069e-22	0.756154	0.571769	4.50372e-18	0.777523	0.604541	1.32675e-18	0.768099	0.589976	9.22488e-17	0.72586	0.526873	2.54097e-13	0.863626	0.74585	3.29718e-22	0.669148	0.447759	4.44306e-10	0.852689	0.727078	2.79659e-20	0.873928	0.76375	4.84126e-22	0.842043	0.709036	1.21629e-16	0.810227	0.656468	1.15955e-13	0.629843	0.396703	5.65487e-07	0.831969	0.692172	7.87597e-13	0.835956
HCPEpiC	0.774669	0.600112	3.0473e-26	0.710473	0.504772	4.95185e-20	0.811132	0.657936	1.46274e-24	0.805737	0.649212	4.19496e-23	0.750797	0.563696	1.04112e-17	0.772625	0.596949	2.96681e-18	0.75513	0.570222	5.87503e-16	0.741661	0.550061	4.07776e-14	0.860824	0.741017	6.33502e-22	0.71198	0.506916	9.96401e-12	0.859619	0.738945	6.39988e-21	0.854888	0.730833	3.42968e-20	0.813198	0.661291	8.85299e-15	0.810727	0.657279	1.08979e-13	0.602487	0.36299	2.29278e-06	0.832339	0.692788	7.53338e-13	0.83422
HEEpiC	0.780778	0.609614	6.89108e-27	0.750441	0.563162	2.52713e-23	0.831249	0.690975	9.8462e-27	0.806232	0.650011	3.7665e-23	0.75439	0.569104	5.94939e-18	0.785594	0.617158	3.36548e-19	0.78561	0.617183	6.20342e-18	0.719085	0.517084	5.35855e-13	0.885316	0.783785	1.21826e-24	0.72022	0.518718	4.43116e-12	0.868089	0.753579	9.44615e-22	0.906467	0.821682	4.99906e-26	0.825415	0.68131	1.5853e-15	0.846918	0.71727	7.0237e-16	0.623613	0.388893	7.87076e-07	0.840597	0.706604	2.71219e-13	0.846801
HEK293T	0.713713	0.509386	9.54498e-21	0.724489	0.524884	4.03849e-21	0.801913	0.643065	1.1901e-23	0.739701	0.547158	7.42996e-18	0.743086	0.552176	3.35328e-17	0.764426	0.584347	1.09229e-17	0.757783	0.574235	4.06098e-16	0.742186	0.55084	3.82864e-14	0.875501	0.766502	1.74828e-23	0.671184	0.450488	3.76232e-10	0.846756	0.716995	9.32152e-20	0.855708	0.732237	2.89111e-20	0.83337	0.694505	4.80786e-16	0.780196	0.608706	3.54572e-12	0.509726	0.25982	0.00011353	0.834871	0.697009	5.5408e-13	0.830846
Hela	0.811598	0.658691	1.71215e-30	0.737851	0.544424	3.19314e-22	0.849047	0.720881	6.58136e-29	0.783814	0.614364	3.69465e-21	0.737856	0.544431	7.24107e-17	0.871106	0.758825	1.13447e-27	0.807133	0.651463	1.55737e-19	0.78274	0.612682	1.75768e-16	0.899618	0.809313	1.57227e-26	0.747694	0.559047	2.38145e-13	0.862428	0.743782	3.44134e-21	0.880309	0.774943	9.92669e-23	0.808597	0.653829	1.6385e-14	0.842817	0.71034	1.32429e-15	0.62276	0.38783	8.23065e-07	0.879111	0.772837	9.34129e-16	0.830957
HepG2	0.752491	0.566243	4.65223e-24	0.736779	0.542843	3.93639e-22	0.837813	0.701931	1.66647e-27	0.760771	0.578772	2.41003e-19	0.781281	0.6104	6.49771e-20	0.684276	0.468234	3.78475e-13	0.773421	0.598181	4.16599e-17	0.763426	0.58282	2.60943e-15	0.892099	0.79584	1.67091e-25	0.684326	0.468302	1.24516e-10	0.875642	0.766748	1.52929e-22	0.859366	0.738509	1.33257e-20	0.871307	0.759175	5.90228e-19	0.827665	0.685029	1.18956e-14	0.666761	0.444571	6.79422e-08	0.797617	0.636192	3.23513e-11	0.754951
HL60	0.808255	0.653276	4.52666e-30	0.755748	0.571155	8.28762e-24	0.871238	0.759055	4.76075e-32	0.750943	0.563915	1.24457e-18	0.763803	0.583395	1.31053e-18	0.8285	0.686413	7.32793e-23	0.793153	0.629092	1.7921e-18	0.677918	0.459573	3.25443e-11	0.864953	0.748143	2.40842e-22	0.679687	0.461974	1.85166e-10	0.896312	0.803375	5.328e-25	0.886952	0.786684	1.72767e-23	0.829015	0.687265	9.30953e-16	0.845943	0.715619	8.18047e-16	0.630965	0.398117	5.32383e-07	0.852316	0.726443	5.73732e-14	0.748687
HMEC	0.767354	0.588833	1.70161e-25	0.751051	0.564077	2.22665e-23	0.82516	0.680889	4.78443e-26	0.79276	0.628468	6.34279e-22	0.781971	0.611479	5.73827e-20	0.824014	0.678999	1.96566e-22	0.749753	0.56213	1.22436e-15	0.740129	0.547791	4.89704e-14	0.881829	0.777623	3.22425e-24	0.702255	0.493162	2.50251e-11	0.857907	0.736005	9.27901e-21	0.89317	0.797752	3.03732e-24	0.841688	0.708439	1.28869e-16	0.831881	0.692025	6.6019e-15	0.637164	0.405979	3.79836e-07	0.861341	0.741908	1.57899e-14	0.841819
HMF	0.754143	0.568732	3.25854e-24	0.676195	0.457239	0	0.770911	0.594304	6.56315e-21	0.6888	0.474446	8.65974e-15	0.748942	0.560914	1.38473e-17	0.722375	0.521826	4.14817e-15	0.680989	0.463746	3.63709e-12	0.614132	0.377158	5.91404e-09	0.800657	0.641051	5.28161e-17	0.631715	0.399064	7.62404e-09	0.80314	0.645034	1.73157e-16	0.853728	0.728851	4.35868e-20	0.842374	0.709594	1.1523e-16	0.822761	0.676935	2.31398e-14	0.594888	0.353891	3.30635e-06	0.782649	0.61254	1.3164e-10	0.792711
HPAF	0.776131	0.602379	2.14423e-26	0.714547	0.510578	2.42706e-20	0.785621	0.6172	3.74104e-22	0.722962	0.522674	9.02393e-17	0.744015	0.553558	2.91893e-17	0.752088	0.565636	7.05185e-17	0.724745	0.525255	2.96128e-14	0.650045	0.422559	3.67638e-10	0.839113	0.70411	6.43565e-20	0.68471	0.468828	1.20455e-10	0.818372	0.669732	1.57416e-17	0.852623	0.726966	5.46638e-20	0.834049	0.695638	4.32934e-16	0.812538	0.660218	8.69292e-14	0.604132	0.364976	2.11542e-06	0.801611	0.642581	2.18067e-11	0.837908
HPF	0.767963	0.589767	1.47824e-25	0.723588	0.523579	4.76663e-21	0.805009	0.648039	5.96065e-24	0.759719	0.577173	2.88382e-19	0.73085	0.534142	1.9743e-16	0.748275	0.559916	1.22762e-16	0.728725	0.53104	1.82631e-14	0.707182	0.500107	1.88856e-12	0.839872	0.705386	5.53947e-20	0.66692	0.444783	5.32207e-10	0.819422	0.671452	1.32346e-17	0.878139	0.771128	1.71825e-22	0.821171	0.674321	2.92433e-15	0.84022	0.705969	1.9606e-15	0.615573	0.37893	1.19325e-06	0.790455	0.624819	6.4218e-11	0.806889
HRE	0.761368	0.579682	6.63867e-25	0.71845	0.51617	1.21151e-20	0.819842	0.672141	1.81156e-25	0.772569	0.596862	3.01707e-20	0.784456	0.61537	3.65526e-20	0.801655	0.642651	1.82653e-20	0.721375	0.520382	4.4298e-14	0.731381	0.534918	1.36062e-13	0.866693	0.751157	1.5868e-22	0.715045	0.511289	7.39609e-12	0.85236	0.726517	2.99373e-20	0.861504	0.74219	8.38674e-21	0.805989	0.649618	2.30565e-14	0.850894	0.724021	3.73018e-16	0.639525	0.408992	3.3336e-07	0.818739	0.670334	3.6116e-12	0.845987
HRPEpiC	0.761317	0.579603	6.71584e-25	0.695862	0.484224	0	0.795832	0.633349	4.47028e-23	0.763105	0.58233	1.61294e-19	0.736787	0.542855	8.4558e-17	0.764917	0.585099	1.01172e-17	0.723521	0.523483	3.42992e-14	0.708371	0.50179	1.67e-12	0.833455	0.694646	1.91916e-19	0.674032	0.454319	2.97473e-10	0.829516	0.688096	2.35248e-18	0.885858	0.784744	2.32135e-23	0.79723	0.635575	7.00086e-14	0.825322	0.681157	1.63886e-14	0.592147	0.350638	3.76449e-06	0.789612	0.623488	6.94928e-11	0.831629
HUVEC	0.804354	0.646986	1.37402e-29	0.746282	0.556937	5.93888e-23	0.842642	0.710045	4.28585e-28	0.808193	0.653175	2.45191e-23	0.814176	0.662883	9.98014e-23	0.812126	0.659549	2.35844e-21	0.776766	0.603365	2.5001e-17	0.801528	0.642447	9.65836e-18	0.922057	0.850189	3.72679e-30	0.740118	0.547775	5.53081e-13	0.891761	0.795237	2.04142e-24	0.894701	0.800489	1.94728e-24	0.853465	0.728403	1.74537e-17	0.841792	0.708613	1.5474e-15	0.633818	0.401725	4.56211e-07	0.871476	0.759471	3.31311e-15	0.861462
K562	0.743709	0.553102	2.94937e-23	0.761418	0.579757	2.43958e-24	0.780974	0.609921	9.46924e-22	0.786156	0.618042	2.34797e-21	0.820996	0.674035	2.21566e-23	0.769534	0.592182	4.88033e-18	0.788808	0.622218	3.68725e-18	0.781152	0.610198	2.21693e-16	0.888075	0.788677	5.51519e-25	0.69434	0.482108	5.15495e-11	0.89404	0.799308	1.04977e-24	0.841204	0.707623	5.12158e-19	0.782835	0.61283	3.88028e-13	0.82028	0.672859	3.21484e-14	0.684254	0.468203	2.23705e-08	0.847176	0.717708	1.15217e-13	0.797395
NHEK	0.743543	0.552856	3.05168e-23	0.749531	0.561797	3.05081e-23	0.827423	0.684629	2.67774e-26	0.760858	0.578905	2.37445e-19	0.782557	0.612395	5.16248e-20	0.787281	0.619812	2.5077e-19	0.787875	0.620747	4.29558e-18	0.798895	0.638233	1.47722e-17	0.870976	0.758599	5.53986e-23	0.706314	0.498879	1.71166e-11	0.867879	0.753214	9.92085e-22	0.870417	0.757626	1.11648e-21	0.847707	0.718608	4.73702e-17	0.814047	0.662672	7.18726e-14	0.608553	0.370337	1.70006e-06	0.845777	0.715339	1.38681e-13	0.837298
SAEC	0.791339	0.626217	4.69655e-28	0.768454	0.590522	5.09588e-25	0.872745	0.761684	2.7767e-32	0.810358	0.656679	1.51743e-23	0.804746	0.647616	7.24458e-22	0.804825	0.647744	9.95766e-21	0.779531	0.607669	1.62805e-17	0.83892	0.703786	1.05537e-20	0.917256	0.841359	2.70143e-29	0.754594	0.569413	1.07679e-13	0.896079	0.802958	5.71598e-25	0.898336	0.807008	6.58956e-25	0.858898	0.737705	6.53814e-18	0.836589	0.699881	3.35414e-15	0.644538	0.415429	2.51704e-07	0.872495	0.761247	2.81162e-15	0.872166
SKNSH	0.778222	0.605629	1.29094e-26	0.691988	0.478847	0	0.830475	0.689689	1.20789e-26	0.764038	0.583754	1.37215e-19	0.798024	0.636843	2.78964e-21	0.810257	0.656516	3.43065e-21	0.794847	0.631782	1.34644e-18	0.770889	0.59427	9.49238e-16	0.890386	0.792787	2.79377e-25	0.667341	0.445344	5.14426e-10	0.856588	0.733742	1.23151e-20	0.850517	0.723379	8.37422e-20	0.879966	0.774341	9.46198e-20	0.795101	0.632186	6.96943e-13	0.652266	0.425451	1.61581e-07	0.832773	0.693511	7.14936e-13	0.698274
WERI	0.727028	0.52857	8.06578e-22	0.661854	0.43805	1.11022e-16	0.78919	0.62282	1.80437e-22	0.683287	0.466882	1.72085e-14	0.675801	0.456708	1.99396e-13	0.754785	0.5697	4.73522e-17	0.720285	0.51881	5.04007e-14	0.688877	0.474551	1.16531e-11	0.852754	0.72719	3.84617e-21	0.555827	0.308944	8.63422e-07	0.831408	0.69124	1.68036e-18	0.774345	0.59961	1.51834e-14	0.644541	0.415433	4.76476e-08	0.731145	0.534573	3.42961e-10	0.619291	0.383522	9.85788e-07	0.845086	0.714171	1.51873e-13	0.719269
[truncated: 20 more columns]

## Sheet: Table S4C
Table S4. Correlations between Enhancer and Promoter with diverse CTCF binding sites across five cell types
	cell type	total			unique			common			ubiquitous
		correlation	correlation^2	p-value	correlation	correlation^2	p-value	correlation	correlation^2	p-value	correlation	correlation^2	p-value
Enhancer	GM12878	0.948365	0.899395	6.08253e-12	0.847206	0.717758	3.40444e-07	0.936519	0.877068	5.04683e-11	0.949573	0.901689	4.76882e-12
	HepG2	0.984388	0.969019	2.50256e-17	0.852135	0.726134	2.46851e-07	0.986005	0.972205	7.99611e-18	0.850969	0.724149	2.66619e-07
	HMEC	0.879518	0.773552	3.25995e-08	0.811591	0.65868	2.60137e-06	0.86797	0.753372	8.08365e-08	0.888352	0.789169	1.5257e-08
	HUVEC	0.911891	0.831545	1.4127e-09	0.867292	0.752196	8.5036e-08	0.900259	0.810466	4.92831e-09	0.924322	0.854371	3.02529e-10
	K562	0.975981	0.952539	2.22257e-15	0.790147	0.624332	7.28852e-06	0.969486	0.939902	2.66649e-14	0.944185	0.891484	1.35207e-11
	NHEK	0.862398	0.74373	1.21616e-07	0.804225	0.646777	3.75825e-06	0.842238	0.709365	4.65515e-07	0.880263	0.774862	3.06494e-08
Promoter	GM12878	0.92994	0.864788	1.38021e-10	0.911446	0.830734	1.48646e-09	0.940092	0.883773	2.79097e-11	0.906198	0.821194	2.65717e-09
	HepG2	0.719225	0.517285	0.000109984	0.337392	0.113833	0.115392	0.74595	0.556441	4.3846e-05	0.900169	0.810304	4.973e-09
	HMEC	0.923118	0.852147	3.55139e-10	0.792802	0.628535	6.45758e-06	0.924682	0.855036	2.88236e-10	0.912465	0.832592	1.32245e-09
	HUVEC	0.931414	0.867533	1.11125e-10	0.911864	0.831496	1.41702e-09	0.93743	0.878775	4.35394e-11	0.91029	0.828627	1.69448e-09
	K562	0.907151	0.822923	2.39725e-09	0.629016	0.395661	0.00130334	0.906838	0.822355	2.47995e-09	0.88863	0.789664	1.48811e-08
	NHEK	0.927254	0.859801	2.02425e-10	0.808312	0.653368	3.07023e-06	0.929867	0.864654	1.39484e-10	0.913248	0.834022	1.20756e-09
