# Supplementary material for: Comprehensive Identification and Annotation of Cell Type-Specific and Ubiquitous CTCF-Binding Sites in the Human Genome
Source: PLoS One. 2012 Jul 19;7(7):e41374. doi: 10.1371/journal.pone.0041374 (PMC3400636; doi:10.1371/journal.pone.0041374)
Supplement: Table S5 — Correlations between CTCF-binding sites and gene expression across cell types. (XLSX) [file pone.0041374.s023.xlsx]

## Sheet: Sheet1
Table S5. Correlations between CTCF binding sites with gene expression across cell types
	correlation	p-value
AG04449	0.800053	1.79268e-23
AG04450	0.600232	4.10258e-11
AG09309	0.720027	3.11766e-17
AG09319	0.556162	1.88571e-09
AG10803	0.552465	2.53592e-09
AoAF	0.658532	9.59233e-14
BJ	0.67447	1.44329e-14
Caco2	0.633725	1.47704e-12
GM06990	0.638613	8.78742e-13
GM12878	0.481249	4.01068e-07
HAsp	0.670591	2.30926e-14
HBMEC	0.721357	2.55978e-17
HCFaa	0.570094	5.97466e-10
HCPE	0.73356	3.96712e-18
HEE	0.605056	2.60297e-11
HEK293	0.565761	8.59109e-10
HeLaS3	0.555138	2.04767e-09
HepG2	0.710154	1.30208e-16
HL60	0.55224	2.58156e-09
HMEC	0.64824	3.07421e-13
HMF	0.422426	1.1983e-05
HPAF	0.596226	5.95168e-11
HPF	0.606079	2.36116e-11
HRE	0.724103	1.69737e-17
HRPE	0.433018	6.80426e-06
HUVEC	0.72752	1.01089e-17
K562	0.450729	2.52891e-06
NHEK	0.69263	1.44329e-15
SAEC	0.692601	1.44329e-15
SKNSHRA	0.739796	1.47015e-18
average	0.624428	7.24264e-07
