# Supplementary material for: Comprehensive Identification and Annotation of Cell Type-Specific and Ubiquitous CTCF-Binding Sites in the Human Genome
Source: PLoS One. 2012 Jul 19;7(7):e41374. doi: 10.1371/journal.pone.0041374 (PMC3400636; doi:10.1371/journal.pone.0041374)
Supplement: Table S6 — Significant GO nodes correlated with cell type-specific and ubiquitous CTCF-binding sites across 38 cell types. (A) Significant GO nodes across cell type-specific and ubiquitous CTCF-binding site combinations of 38 cell lines. (B) Significant GO nodes across all proximal CTCF-binding site combinations of 38 cell lines. (XLSX) [file pone.0041374.s024.xlsx]

## Sheet: Table S6A
Table S6A. Significant GO nodes correlated with cell type specific and ubiquitous CTCF binding sites across 38 cell types
Description	C1	C8	C11	C21	C36	C27	C15	C37	C19	C38	C7	C6	C30	C33	C23	C29	C16	C22	C28	C10	C14	C2	C17	C24	C31	C5	C12	C13	C4	C20	C3	C25	C34	C9	C35	C26	C32	C18	Ubiquitous
GO:0044260_cellular_macromolecule_metabolic_process	0.00782464	0.123587	0.168986	0.147359	0.239841	0.126567	0.854367	0.485204	0.731999	0.899287	0.711953	0.609699	0.954107	0.712877	0.553894	0.547215	0.0448847	0.131876	0.478111	0.327304	0.0340549	0.0943693	0.269285	0.000371086	0.0450812	0.0730151	0.0743359	0.00312287	0.00690358	0.448592	0.0672101	0.761692	0.590644	0.950633	0.575062	0.268226	0.967566	0.572793	0.000344364
GO:0044267_cellular_protein_metabolic_process	0.00559722	0.0924063	0.279014	0.0968582	0.30446	0.0996016	0.820065	0.468238	0.724945	0.94116	0.806732	0.681887	0.94634	0.729365	0.490542	0.61563	0.0363277	0.106719	0.575807	0.305026	0.0254794	0.125932	0.350581	0.000275691	0.0360864	0.0578318	0.0564929	0.0041933	0.00984258	0.418312	0.0560642	0.735505	0.533172	0.963534	0.523514	0.245849	0.960181	0.546132	0.00133625
GO:0019538_protein_metabolic_process	0.005102	0.157253	0.34742	0.150834	0.335479	0.174884	0.742505	0.586288	0.517527	0.965047	0.616437	0.800714	0.935891	0.657898	0.660272	0.255582	0.045781	0.1656	0.44627	0.394163	0.0721163	0.152643	0.356714	0.000262973	0.0808829	0.0588844	0.107948	0.00855186	0.0285277	0.396869	0.0349091	0.703585	0.675064	0.957968	0.712816	0.210455	0.933398	0.489372	0.00122424
GO:0043687_post-translational_protein_modification	0.00168244	0.500953	0.800885	0.602782	0.60609	0.0760588	0.753232	0.437409	0.300553	0.383183	0.53981	0.794076	0.603831	0.765654	0.199419	0.206131	0.0508381	0.241437	0.349771	0.600523	0.0947168	0.0818485	0.226069	0.0305358	0.169987	0.396666	0.326307	0.0105533	0.30111	0.187896	0.173023	0.788382	0.73863	0.704277	0.500861	0.518927	0.988007	0.980924	0.0339679
GO:0043412_biopolymer_modification	0.00147944	0.65263	0.697536	0.372622	0.453251	0.108356	0.849677	0.690071	0.238968	0.34006	0.651177	0.737249	0.778673	0.555357	0.489998	0.210837	0.0929766	0.431756	0.404	0.520663	0.098134	0.145474	0.28189	0.0402758	0.170179	0.102656	0.280739	0.0209517	0.138539	0.212934	0.0750575	0.82601	0.611526	0.740535	0.504109	0.684697	0.990022	0.992596	0.0152046
GO:0006464_protein_modification_process	0.000437544	0.562864	0.755206	0.409514	0.543556	0.169564	0.799123	0.729535	0.21668	0.605256	0.683391	0.811966	0.7447	0.568287	0.400196	0.170133	0.0714126	0.363224	0.357518	0.711289	0.0699728	0.114579	0.241206	0.0721586	0.135359	0.191175	0.298276	0.0259172	0.106485	0.314542	0.111519	0.836495	0.530316	0.786218	0.538054	0.650462	0.996412	0.990797	0.0316531
GO:0043170_macromolecule_metabolic_process	5.2094e-05	0.00452705	0.142021	0.0184721	0.0619777	0.269169	0.216605	0.531755	0.547701	0.95101	0.364845	0.378423	0.614065	0.356997	0.840076	0.105506	0.0584139	0.206141	0.328679	0.100771	0.179098	0.179708	0.490186	0.00540741	0.518892	0.297131	0.214217	0.0725768	0.0604007	0.381313	0.283309	0.999549	0.761856	0.752519	0.748765	0.44803	0.52133	0.586317	0.102128
GO:0043283_biopolymer_metabolic_process	1.35638e-05	0.0626021	0.382658	0.0326363	0.0179979	0.058789	0.310508	0.609908	0.307011	0.859564	0.375391	0.229083	0.280407	0.315411	0.78157	0.251105	0.267187	0.266429	0.489057	0.535505	0.309135	0.185369	0.746574	0.158356	0.704147	0.600887	0.542025	0.0866348	0.226672	0.583138	0.468328	0.999927	0.854908	0.553252	0.666367	0.811371	0.441848	0.950665	0.569993
GO:0044237_cellular_metabolic_process	0.000315449	0.0135191	0.135542	0.0215501	0.0524777	0.49924	0.399785	0.199605	0.496313	0.957145	0.482308	0.231875	0.449805	0.418099	0.340804	0.541153	0.285339	0.366789	0.152215	0.104533	0.476168	0.366278	0.283981	0.0125182	0.380261	0.258711	0.287913	0.0370808	0.147816	0.198959	0.631547	0.993003	0.633948	0.740161	0.648875	0.53004	0.810164	0.869557	0.104508
GO:0044238_primary_metabolic_process	0.000394332	0.00835841	0.212081	0.0518561	0.0343309	0.674879	0.509517	0.20318	0.244597	0.976798	0.247125	0.181478	0.591779	0.396483	0.568342	0.29733	0.0630277	0.479223	0.104793	0.208705	0.590401	0.490679	0.214125	0.0323631	0.599571	0.287374	0.390062	0.0684043	0.166782	0.215149	0.444393	0.988616	0.414202	0.825217	0.747038	0.410437	0.760782	0.795654	0.201261
GO:0008152_metabolic_process	0.000314273	0.0104962	0.15644	0.0907452	0.150628	0.806703	0.136562	0.275321	0.428237	0.975417	0.357459	0.352621	0.610445	0.470852	0.645463	0.42362	0.14942	0.563211	0.190858	0.235239	0.737118	0.609381	0.346292	0.0256828	0.629722	0.131561	0.400377	0.0322442	0.282852	0.310389	0.618511	0.91952	0.548445	0.860522	0.66147	0.626404	0.700319	0.848252	0.100924
GO:0009987_cellular_process	0.234706	0.402249	0.699699	0.218676	0.0325108	0.818138	0.551135	0.186603	0.110034	0.612305	0.156506	0.492545	0.0943943	0.156616	0.797758	0.392541	0.820397	0.0630735	0.885523	0.6362	0.430259	0.324235	0.285706	0.00811877	0.0839434	0.343902	0.347423	0.457918	0.175428	0.285881	0.825511	0.999983	0.96987	0.415322	0.712828	0.686228	0.752937	0.928987	0.0781023
GO:0065007_biological_regulation	0.0105665	0.0180804	0.589533	0.0264409	0.0243619	0.231864	0.112736	0.210569	0.819368	0.234384	0.0603993	0.00622952	0.210446	0.385985	0.811287	0.614051	0.172955	0.405609	0.531098	0.782261	0.453015	0.0788915	0.351256	0.372677	0.315898	0.478739	0.508523	0.746568	0.9683	0.471499	0.814406	0.94973	0.95885	0.93757	0.679418	0.795462	0.982401	0.942187	0.799805
GO:0050789_regulation_of_biological_process	0.0020334	0.00699693	0.695113	0.0699457	0.0276716	0.189699	0.10613	0.175233	0.75086	0.553731	0.0515936	0.000583483	0.209405	0.349897	0.744314	0.695456	0.458148	0.355797	0.628314	0.62681	0.56778	0.120259	0.325777	0.407348	0.3109	0.472277	0.608606	0.502156	0.858014	0.743392	0.918701	0.992775	0.842241	0.808372	0.801292	0.859272	0.950953	0.928865	0.901082
GO:0050794_regulation_of_cellular_process	0.000431915	0.00152852	0.717426	0.0442672	0.0439723	0.225904	0.159078	0.249084	0.790421	0.621281	0.0507306	0.00491355	0.257198	0.426915	0.719751	0.671684	0.564743	0.191513	0.560901	0.490593	0.620852	0.232928	0.362491	0.639613	0.480077	0.560278	0.525582	0.747947	0.83369	0.713287	0.81758	0.996963	0.897361	0.90616	0.695137	0.86321	0.866673	0.933254	0.951787
GO:0006139_nucleobase,_nucleoside,_nucleotide_and_nucleic_acid_metabolic_process	0.0302268	0.0286368	0.45025	0.05613	0.0568575	0.493271	0.228607	0.648582	0.568483	0.670652	0.15326	0.129289	0.241083	0.29428	0.336503	0.647605	0.359677	0.187789	0.526311	0.623838	0.895905	0.615981	0.786233	0.393012	0.899343	0.96175	0.529546	0.803625	0.867449	0.607267	0.992883	0.998932	0.787858	0.450591	0.860603	0.704046	0.146629	0.828761	0.995392
GO:0016070_RNA_metabolic_process	0.00725671	0.0058402	0.476913	0.0413934	0.0555831	0.313418	0.0554093	0.526717	0.792201	0.808448	0.162344	0.160141	0.172041	0.236549	0.513356	0.600455	0.487438	0.288713	0.410889	0.629887	0.810129	0.720775	0.90606	0.377522	0.953718	0.988315	0.890419	0.731677	0.892421	0.975918	0.881487	0.99564	0.796215	0.221282	0.831482	0.801092	0.111387	0.91005	0.998151
GO:0010467_gene_expression	0.0418338	0.00219439	0.270401	0.0334433	0.104666	0.455764	0.046153	0.510929	0.914542	0.852571	0.252311	0.244727	0.408497	0.348538	0.618202	0.870162	0.571172	0.202245	0.314235	0.300028	0.760454	0.589634	0.720702	0.0714531	0.892195	0.965605	0.660299	0.911694	0.83682	0.955305	0.887506	0.999667	0.851004	0.514194	0.913777	0.540003	0.476244	0.830375	0.963401
GO:0019222_regulation_of_metabolic_process	0.00196461	0.000361402	0.353991	0.266919	0.0710136	0.412117	0.181109	0.416887	0.680319	0.855289	0.171628	0.0134975	0.214927	0.202837	0.335989	0.772376	0.318806	0.105505	0.341572	0.483365	0.27214	0.559063	0.639446	0.589311	0.811592	0.698503	0.785563	0.915491	0.708306	0.783517	0.734174	0.991959	0.812178	0.678141	0.92575	0.976791	0.778597	0.928031	0.99075
GO:0010468_regulation_of_gene_expression	0.012398	0.00161301	0.274168	0.21061	0.0232602	0.27151	0.0907916	0.405808	0.926777	0.775613	0.0942526	0.0629078	0.214401	0.189425	0.436611	0.827489	0.396482	0.135105	0.469585	0.572931	0.628309	0.513252	0.638702	0.624176	0.926876	0.920641	0.668368	0.927148	0.903548	0.81233	0.72805	0.998935	0.82083	0.684561	0.919492	0.957792	0.842861	0.989979	0.986477
GO:0031323_regulation_of_cellular_metabolic_process	0.00213294	0.00196925	0.368309	0.230028	0.0772656	0.388685	0.114805	0.454505	0.907507	0.846872	0.159104	0.0570753	0.274453	0.175417	0.430641	0.804293	0.483733	0.10117	0.407644	0.434409	0.446203	0.60303	0.708964	0.530884	0.909308	0.864948	0.699095	0.923616	0.890548	0.933203	0.790398	0.99823	0.792201	0.687331	0.925279	0.969203	0.717587	0.993112	0.992645
GO:0032774_RNA_biosynthetic_process	0.00550913	0.0325422	0.410638	0.126262	0.0449378	0.310626	0.0270728	0.432899	0.932531	0.761681	0.0793279	0.0890214	0.130631	0.100596	0.344125	0.463823	0.374833	0.353309	0.632085	0.680678	0.736292	0.7343	0.885825	0.676009	0.923489	0.969938	0.803591	0.843062	0.888379	0.936395	0.737173	0.987322	0.547366	0.397978	0.815202	0.981659	0.613666	0.997602	0.993159
GO:0006351_transcription,_DNA-dependent	0.00550913	0.0325422	0.410638	0.126262	0.0449378	0.310626	0.0270728	0.432899	0.932531	0.761681	0.0793279	0.0890214	0.130631	0.100596	0.344125	0.463823	0.374833	0.353309	0.632085	0.680678	0.736292	0.7343	0.885825	0.676009	0.923489	0.969938	0.803591	0.843062	0.888379	0.936395	0.737173	0.987322	0.547366	0.397978	0.815202	0.981659	0.613666	0.997602	0.993159
GO:0006355_regulation_of_transcription,_DNA-dependent	0.00580669	0.0213739	0.477202	0.278727	0.0471516	0.260662	0.030731	0.420979	0.970986	0.809804	0.092942	0.0729458	0.112809	0.0751377	0.28419	0.671443	0.337324	0.305692	0.598651	0.657835	0.693154	0.7002	0.868597	0.647886	0.908226	0.961266	0.762307	0.812836	0.866676	0.926591	0.7068	0.996426	0.662499	0.454781	0.847789	0.978662	0.7002	0.997129	0.993202
GO:0006350_transcription	0.00923234	0.0196981	0.237299	0.0731758	0.0374278	0.380247	0.0453191	0.459699	0.898446	0.653815	0.0469715	0.148162	0.190874	0.204302	0.302519	0.583952	0.35986	0.226926	0.581442	0.548644	0.839081	0.818746	0.850266	0.595606	0.912682	0.970859	0.779093	0.854117	0.935803	0.958657	0.813355	0.991205	0.629971	0.433575	0.898807	0.869038	0.718122	0.951879	0.99447
GO:0045449_regulation_of_transcription	0.00670781	0.00979151	0.363635	0.144669	0.0320629	0.299537	0.0429242	0.540192	0.939642	0.786904	0.0474227	0.114215	0.157132	0.143332	0.282408	0.754294	0.30474	0.171184	0.528988	0.510017	0.788355	0.776317	0.818101	0.549573	0.886302	0.957327	0.710874	0.87794	0.913122	0.94781	0.774853	0.996487	0.780003	0.570012	0.909205	0.941248	0.776317	0.985084	0.996492
GO:0019219_regulation_of_nucleobase,_nucleoside,_nucleotide_and_nucleic_acid_metabolic_process	0.00348379	0.00674674	0.418875	0.192032	0.0503205	0.364213	0.0631525	0.635417	0.944055	0.804793	0.0675114	0.0849862	0.184078	0.191542	0.285615	0.792386	0.349009	0.102018	0.571458	0.541255	0.754176	0.708141	0.844405	0.586852	0.908008	0.940427	0.766759	0.90459	0.931849	0.956729	0.806298	0.995783	0.767392	0.523794	0.932694	0.949966	0.708141	0.987712	0.99725
GO:0006796_phosphate_metabolic_process	0.0246259	0.220086	0.510163	0.819994	0.903475	0.119928	0.705155	0.218108	0.0994572	0.409855	0.182121	0.852347	0.572414	0.791837	0.276277	0.627974	0.482323	0.739049	0.83072	0.69195	0.0436904	0.0710647	0.158756	0.459871	0.269239	0.452463	0.826212	0.0184146	0.559811	0.889924	0.539901	0.198237	0.66661	0.364119	0.4789	0.318587	0.985898	1	0.00560979
GO:0006793_phosphorus_metabolic_process	0.0246259	0.220086	0.510163	0.819994	0.903475	0.119928	0.705155	0.218108	0.0994572	0.409855	0.182121	0.852347	0.572414	0.791837	0.276277	0.627974	0.482323	0.739049	0.83072	0.69195	0.0436904	0.0710647	0.158756	0.459871	0.269239	0.452463	0.826212	0.0184146	0.559811	0.889924	0.539901	0.198237	0.66661	0.364119	0.4789	0.318587	0.985898	1	0.00560979
GO:0016310_phosphorylation	0.0228152	0.181322	0.59538	0.850518	0.872003	0.14507	0.675645	0.176487	0.262207	0.76888	0.153282	0.708593	0.964648	0.641021	0.112498	0.413121	0.662164	0.782629	0.701126	0.571168	0.0360049	0.0484656	0.151177	0.535566	0.223612	0.669545	0.830827	0.232983	0.501111	0.802112	0.759939	0.203958	0.615829	0.260676	0.334893	0.407279	0.958966	1	0.0148996
GO:0006468_protein_amino_acid_phosphorylation	0.0111709	0.260288	0.733067	0.922575	0.859426	0.12399	0.810959	0.245292	0.403965	0.825718	0.376797	0.522407	0.927582	0.862321	0.182048	0.222546	0.474294	0.563455	0.781781	0.443987	0.0729102	0.0347491	0.156976	0.381046	0.354498	0.43814	0.752371	0.0853291	0.465547	0.908908	0.605016	0.447706	0.455901	0.654802	0.12928	0.551208	0.901718	1	0.010836
GO:0007165_signal_transduction	0.210496	0.486935	0.744542	0.834018	0.947482	0.296264	0.457118	0.0350108	0.310289	0.177787	0.43932	0.207	0.053166	0.885862	0.633815	0.56404	0.598984	0.427612	0.99948	0.786911	0.187401	0.0637254	0.149667	0.685061	0.373693	0.862015	0.705086	0.581118	0.355779	0.483495	0.929502	0.940008	0.398913	0.168333	0.175529	0.411528	0.633762	0.920501	0.560663
GO:0007154_cell_communication	0.10853	0.744426	0.68686	0.840318	0.906594	0.193939	0.348479	0.0141011	0.307023	0.247237	0.34523	0.262378	0.0504447	0.8704	0.785426	0.732815	0.427194	0.442289	0.952221	0.888918	0.41648	0.143772	0.237167	0.842702	0.261045	0.832486	0.631796	0.637324	0.558383	0.692427	0.96071	0.964319	0.120048	0.225004	0.216939	0.111771	0.689924	0.926272	0.660564
GO:0007167_enzyme_linked_receptor_protein_signaling_pathway	0.0037713	0.650179	1	0.843363	0.567005	0.0384624	0.784113	0.605957	0.12589	0.852225	0.974068	0.584998	0.738822	0.939834	0.582391	1	0.551757	1	0.431639	0.544466	0.195828	0.593022	0.185458	1	0.608725	0.94029	0.740716	0.5295	0.906867	1	1	0.840355	1	0.946979	0.131713	0.243336	0.867242	0.617751	0.382053
GO:0007169_transmembrane_receptor_protein_tyrosine_kinase_signaling_pathway	0.0202189	0.575274	1	0.870544	0.887367	0.0219178	0.807076	0.792051	0.209552	0.902177	1	0.764739	0.623335	0.963498	0.893063	1	1	1	1	1	0.188372	0.425225	0.668631	1	0.439645	1	0.773217	0.607118	0.822061	1	1	0.920671	1	0.881872	0.107679	0.50312	0.769732	1	0.530634
GO:0032501_multicellular_organismal_process	0.64449	0.58616	0.390891	0.674151	0.817246	0.0539849	0.0133745	0.255615	0.889767	0.0702216	0.171426	0.261719	0.751889	0.821828	0.381532	0.873703	0.434808	0.84654	0.962919	0.731137	0.948214	0.487775	0.969012	0.674432	0.651514	0.401211	0.710296	0.342521	0.351918	0.841732	0.283279	0.80008	0.719876	0.967264	0.524037	0.382695	0.487775	0.532436	0.989477
GO:0007275_multicellular_organismal_development	0.595983	0.24285	0.424134	0.825191	0.388617	0.0314826	0.189968	0.541566	0.602907	0.188468	0.233172	0.478001	0.664131	0.583208	0.184386	0.818153	0.3763	0.801757	0.973435	0.706796	0.787964	0.19417	0.977105	0.981402	0.912593	0.474868	0.303746	0.595979	0.562438	0.817206	0.535684	0.984301	0.818166	0.743055	0.824225	0.729794	0.387252	0.567606	0.999331
GO:0009888_tissue_development	0.374943	0.860425	0.775079	0.952385	0.976616	0.617435	0.467356	0.700767	0.443249	0.383273	0.039634	0.887219	1	0.958132	0.193632	1	0.324869	0.671086	0.804752	1	0.969264	1	0.488999	1	1	0.810135	0.605535	0.591944	0.10896	1	0.528771	0.585079	0.859821	0.827923	0.898973	1	0.890809	0.27703	0.381719
GO:0001501_skeletal_development	0.228796	0.215266	0.901405	0.957093	0.657683	0.451679	0.155377	0.325696	0.236397	0.453494	0.207108	1	1	0.982394	0.67091	1	0.0787759	0.771977	0.733318	1	0.767513	1	0.740181	1	1	0.917997	0.858857	0.713285	0.0163633	1	0.16966	0.972409	0.980926	0.926203	0.820012	1	1	1	0.552244
GO:0007166_cell_surface_receptor_linked_signal_transduction	0.0640866	0.819719	0.911032	0.813672	0.888151	0.314956	0.872188	0.182623	0.630359	0.022655	0.379969	0.402508	0.163721	0.879642	0.965789	0.945475	0.77753	0.838438	0.864551	0.391618	0.736142	0.0545724	0.409537	0.511583	0.603312	0.890052	0.870738	0.948108	0.62053	0.215518	0.65547	0.894388	0.974279	0.845097	0.449856	0.182623	0.835444	0.551753	0.986124
GO:0007186_G-protein_coupled_receptor_protein_signaling_pathway	0.730372	0.938138	0.846157	0.945894	0.98298	0.704784	0.981367	0.24456	0.856272	0.00882149	0.623638	0.689702	0.694896	0.962057	0.957829	0.901986	1	0.926594	1	0.409348	0.816754	0.479718	0.757779	0.880803	0.717668	0.556843	0.971767	0.964456	0.796898	0.645912	0.55779	0.810203	0.897722	0.766851	0.433313	1	0.699247	1	0.994752
GO:0003008_system_process	0.650478	0.953372	0.529114	0.815228	0.941238	0.180238	0.0418384	0.0446859	0.897042	0.348398	0.345847	0.680489	0.951283	0.678265	0.911711	0.945185	0.621221	0.861412	0.759832	1	0.85459	0.973494	0.971314	0.918318	0.161795	0.354063	0.864299	0.636197	0.828994	0.987868	0.821111	0.221587	0.540003	0.941731	0.0874796	0.102442	0.535169	0.853754	0.758348
GO:0007600_sensory_perception	0.906615	0.939444	0.438664	0.978991	0.65974	0.0692434	0.63858	0.765535	0.662308	0.349103	0.857008	1	0.832706	0.70271	0.814125	0.94419	1	0.59909	0.862414	1	0.591714	0.744257	1	0.788535	0.0511452	0.713094	0.887551	0.889324	0.599471	1	0.633832	0.596922	0.997375	1	0.0157457	0.357969	0.932067	1	0.534251
GO:0006996_organelle_organization_and_biogenesis	0.366605	0.63974	0.529114	0.437039	0.374216	0.180238	0.996897	0.936336	0.213487	0.878581	0.104057	0.680489	0.486322	0.462853	0.702655	0.31099	0.775769	0.524612	0.395259	0.941051	0.00897868	0.829138	1	0.571499	0.408426	0.853772	0.782792	0.997503	0.175543	0.233582	0.927034	0.833845	0.89737	0.880915	0.985066	1	0.99393	0.417428	0.558643
GO:0007010_cytoskeleton_organization_and_biogenesis	0.215463	0.492852	0.768891	0.934483	0.958831	0.862424	0.959279	0.896293	0.0538723	0.569278	0.18955	0.816103	0.148471	0.149979	0.817328	0.235291	0.947723	0.960129	1	1	0.0217071	0.822455	1	0.841073	0.834574	0.988246	0.942534	1	0.0688826	0.116413	0.722808	0.504998	0.913439	0.661934	0.996366	1	1	0.780453	0.804405
GO:0030036_actin_cytoskeleton_organization_and_biogenesis	0.501792	0.364614	0.27898	0.993077	0.976001	0.94294	1	0.90695	0.0487519	0.596109	0.253475	0.412531	0.0685626	0.212106	0.505788	1	0.739812	0.664894	1	1	0.0715212	1	1	1	0.434099	1	1	1	0.234178	1	1	0.234715	0.959607	0.341705	0.922885	1	1	0.499288	0.731783
GO:0030029_actin_filament-based_process	0.441885	0.426097	0.317965	0.985188	0.907511	0.954337	0.962087	0.931147	0.0715536	0.662105	0.297689	0.449901	0.0816706	0.127042	0.565051	1	0.765688	0.704429	1	1	0.0322582	1	1	1	0.472297	1	1	1	0.268973	1	1	0.110323	0.856461	0.385483	0.936824	1	1	0.525522	0.635827
GO:0051246_regulation_of_protein_metabolic_process	0.771404	0.000446278	0.0289801	0.766218	0.684773	0.697597	1	0.516459	0.0833914	0.903749	1	0.265836	1	0.919063	0.855759	0.863647	0.506825	0.158869	0.745777	1	0.0641346	0.273035	0.400192	0.657944	0.852077	0.466883	0.68782	0.927113	0.16398	0.304001	0.777913	0.643261	0.983473	0.932847	0.624313	1	1	0.587008	0.320317
GO:0051128_regulation_of_cellular_component_organization_and_biogenesis	0.87095	0.00170997	1	0.906334	1	1	1	0.429459	0.167573	1	1	0.473279	1	0.769267	0.22921	1	0.452884	0.643892	1	1	0.0781676	1	1	1	1	0.596671	1	1	0.173596	0.326171	1	0.598903	1	1	1	1	1	0.266452	0.816022
GO:0022610_biological_adhesion	0.943794	0.837024	0.99082	0.435282	0.900213	0.93567	0.723081	0.967518	0.0283611	0.820284	0.897325	0.881795	0.43231	0.692768	0.535886	0.290196	0.0900773	0.815221	0.728152	1	0.90299	0.749803	0.980695	0.951787	0.898985	0.708732	0.638978	0.930457	0.374468	0.364844	0.0474378	0.606794	0.205697	0.301272	0.994495	0.917868	0.887795	0.917868	0.794587
GO:0007155_cell_adhesion	0.943794	0.837024	0.99082	0.435282	0.900213	0.93567	0.723081	0.967518	0.0283611	0.820284	0.897325	0.881795	0.43231	0.692768	0.535886	0.290196	0.0900773	0.815221	0.728152	1	0.90299	0.749803	0.980695	0.951787	0.898985	0.708732	0.638978	0.930457	0.374468	0.364844	0.0474378	0.606794	0.205697	0.301272	0.994495	0.917868	0.887795	0.917868	0.794587
GO:0050896_response_to_stimulus	0.983922	0.683786	0.0201842	0.235194	0.955341	0.656813	0.693041	0.975318	0.502415	0.71743	0.812107	0.757866	0.360721	0.980231	0.916861	0.999198	0.555738	0.895559	0.93726	0.97415	0.286662	0.309501	0.944372	0.486719	0.469571	0.650847	0.537126	0.462518	0.682487	0.546662	0.966133	0.0164448	0.649588	0.521212	0.775798	0.991242	0.994134	0.998995	0.88433
GO:0006950_response_to_stress	0.616986	0.662727	0.0764913	0.0240329	0.864484	0.907933	0.613083	0.729675	0.792062	0.829058	0.521261	0.31818	0.827699	0.880552	0.960234	0.994888	0.260854	0.722999	0.961972	1	0.900984	0.332902	0.884855	0.331049	0.8196	0.571058	0.193641	0.717589	0.986833	0.370249	0.912917	0.111241	0.78749	0.484276	0.999995	1	0.966508	1	0.619066
GO:0009605_response_to_external_stimulus	0.995484	0.897106	0.280796	0.188345	0.72861	0.989564	0.629144	0.988809	0.309798	0.533156	0.464244	0.782014	0.524458	0.985222	0.995216	1	0.180949	0.963178	0.595535	1	0.633013	0.598091	1	0.214328	0.419827	0.99747	0.399132	0.982638	0.993501	0.462997	0.659369	0.0322829	0.55334	0.722578	0.995352	1	0.986212	0.869989	0.563946
GO:0009611_response_to_wounding	0.996251	0.964186	0.314645	0.351211	0.60356	0.927378	0.556358	0.998939	0.376812	0.727892	0.597905	0.546162	0.579428	0.990127	0.996114	1	0.127642	0.947185	0.636103	1	0.945253	0.791566	1	0.0838903	0.804645	1	0.660195	0.984817	0.969506	0.255578	0.909817	0.00896189	0.610462	0.407113	1	1	1	1	0.593474
GO:0002376_immune_system_process	0.999032	0.511824	0.00191511	0.776105	0.269526	0.893368	0.847219	0.996366	0.0539848	0.858745	0.841392	0.161909	0.597192	0.949369	0.846172	0.962119	0.932713	0.859153	1	0.844081	0.177003	0.681274	0.972396	0.936547	0.954918	0.773568	0.387532	0.998808	0.912942	0.944757	0.894816	0.603484	0.199708	0.124309	0.964791	1	0.991545	1	0.667896
GO:0006955_immune_response	0.996055	0.612172	0.00395388	0.918989	0.497773	0.804304	0.842558	0.999998	0.106028	0.799011	0.740289	0.43344	0.397296	0.884955	0.784139	0.887192	1	0.911723	1	0.745573	0.161607	0.444602	1	0.868777	0.872705	0.954923	0.485535	1	0.915274	1	0.942072	0.754728	0.123533	0.0243995	0.855913	1	1	1	0.806058
GO:0005975_carbohydrate_metabolic_process	0.89079	0.660631	0.0654205	0.910762	0.714212	0.975381	0.932929	0.899009	0.724912	0.0219413	0.882739	0.939912	1	0.591509	0.851661	0.577489	0.73586	0.938665	0.337164	0.670826	0.817174	0.529513	0.154897	0.807695	0.946978	0.342672	0.62589	0.982135	0.225311	0.822983	1	0.861302	0.405251	0.774125	0.540671	1	0.30068	0.743094	0.0536986
GO:0044262_cellular_carbohydrate_metabolic_process	0.882472	0.840259	0.13033	0.938222	0.615725	0.920394	0.935139	0.795468	0.557791	0.0373654	0.894976	0.877788	1	0.321042	0.630913	0.89864	1	0.848216	0.459383	0.564232	0.64006	0.346561	0.0707266	0.708421	1	0.559451	0.374564	0.950642	0.445242	0.725929	1	0.991659	0.676357	0.811829	0.715204	1	0.346561	1	0.0190003
GO:0006091_generation_of_precursor_metabolites_and_energy	0.987828	0.530941	0.97656	0.8701	0.729346	0.977329	0.937688	0.729846	0.92086	0.576752	0.966222	0.942767	1	0.442785	0.861627	1	1	0.990025	0.346816	1	1	0.945144	0.161663	1	0.949606	0.909816	0.801289	0.766113	0.851088	0.82821	1	0.00689101	0.163344	0.590246	0.87955	0.749067	0.541046	1	0.0293187
GO:0055086_nucleobase,_nucleoside_and_nucleotide_metabolic_process	0.404746	1	1	0.88919	0.526484	0.949759	0.821233	0.812398	0.384921	0.455466	0.935666	1	0.635267	0.237859	0.0370851	1	0.754924	0.909962	1	1	1	0.441448	0.309697	1	0.790129	1	0.0662177	1	1	0.229187	1	0.274647	0.639322	0.889905	0.488005	1	1	1	0.267154
GO:0009117_nucleotide_metabolic_process	0.514567	1	1	0.870544	0.500953	1	0.807076	0.792051	0.356147	0.605963	0.929778	1	0.623335	0.218458	0.0314298	1	0.743674	1	1	1	1	0.425225	0.296502	1	1	1	0.058387	1	1	0.21858	1	0.244499	0.830886	0.881872	0.466662	1	1	1	0.222352
GO:0007266_Rho_protein_signal_transduction	0.728132	1	1	0.986739	0.833617	0.747675	0.421258	0.929278	0.682978	0.0362922	0.717254	1	1	1	0.0309427	1	1	1	1	1	1	1	0.408636	1	1	1	0.742393	1	1	1	1	0.967408	0.78629	0.263925	0.708354	1	1	1	0.738107
GO:0048523_negative_regulation_of_cellular_process	0.189183	0.0398459	0.451346	0.00771426	0.0954445	0.663086	0.894055	0.589718	0.0848583	0.29541	0.309333	0.573506	0.872602	0.439501	0.967689	0.51296	0.670014	0.346316	0.913054	0.949297	0.453446	0.17703	0.806288	0.802878	0.0611221	0.121454	0.989137	0.80748	0.472974	0.269728	0.536384	0.617431	0.981583	0.729522	0.897541	0.872995	0.739889	0.455905	0.84983
GO:0048519_negative_regulation_of_biological_process	0.175173	0.0390518	0.504813	0.0175	0.0896259	0.720161	0.920767	0.596748	0.125977	0.379537	0.368219	0.618224	0.890171	0.510131	0.978607	0.561197	0.708971	0.403298	0.926745	0.955514	0.390019	0.210762	0.831686	0.645234	0.0781953	0.153391	0.981992	0.741065	0.52392	0.302126	0.577944	0.573247	0.973423	0.773125	0.92154	0.887777	0.775316	0.488591	0.902755
GO:0009892_negative_regulation_of_metabolic_process	0.0455129	0.0490222	0.49705	0.0708936	0.0529906	0.920427	0.997687	0.246157	0.00602657	0.22066	0.396485	0.302067	1	0.442785	0.598206	0.813226	0.74442	0.462355	0.882486	0.677096	0.45428	0.541046	1	0.813106	1	0.557489	0.996441	0.912842	0.65073	0.245228	0.674801	0.797502	0.951449	0.783926	0.962384	1	0.781169	0.393414	0.829165
GO:0006366_transcription_from_RNA_polymerase_II_promoter	0.0792357	0.0525157	0.485072	0.199811	0.0442646	0.334399	0.108595	0.643038	0.701523	0.707046	0.369991	0.807399	0.323108	0.497413	0.318731	0.495521	0.573684	0.371194	0.626472	1	0.969502	0.815282	0.845588	0.723608	0.94257	0.859836	0.991523	0.865232	0.966672	0.74842	0.973619	0.927341	0.842915	0.95486	0.950621	1	0.63397	0.881909	0.997671
GO:0006357_regulation_of_transcription_from_RNA_polymerase_II_promoter	0.177175	0.0184887	0.544454	0.239593	0.0391072	0.369581	0.0448488	0.559371	0.556525	0.401038	0.291367	1	0.32195	0.505813	0.511911	0.838776	0.94269	0.704071	0.3821	1	0.952841	0.954246	0.901716	1	0.95819	0.605179	1	0.800399	0.973378	0.550157	1	0.954452	0.900785	0.936459	0.995671	1	0.581956	1	0.997851
GO:0007049_cell_cycle	0.039935	0.124703	0.0298949	0.0597497	0.362075	0.88768	0.33656	0.977872	0.84577	0.682992	0.295233	0.661888	0.956699	0.803287	0.506019	0.109837	1	0.730777	0.857877	1	0.722523	0.673236	0.971322	0.934659	0.695137	0.76564	0.943954	0.989789	0.973593	0.943029	0.891366	0.583587	0.939068	0.795975	0.545219	0.894479	0.298411	0.894479	0.805392
GO:0022402_cell_cycle_process	0.0945846	0.117493	0.0384503	0.0465636	0.415474	0.704784	0.316694	0.920976	0.659765	0.646356	0.188074	0.468277	0.913512	0.815255	0.574538	0.33368	1	0.670308	0.748137	1	0.816754	0.699247	0.937274	0.880803	0.717668	0.738214	0.971767	0.994444	0.986806	1	0.949379	0.631836	0.897722	0.89684	0.756665	0.826801	0.699247	0.826801	0.719507
GO:0051726_regulation_of_cell_cycle	0.0420663	0.32375	0.585609	0.310534	0.547302	0.484277	0.354751	0.941139	0.678467	0.474233	0.241947	0.406191	0.796463	0.900228	0.728231	0.460525	1	0.890008	1	1	0.715267	0.684678	1	1	0.914928	0.842961	1	0.965849	0.940074	1	0.85633	0.433088	0.967339	0.664856	0.390119	1	0.415369	1	0.99753
GO:0000074_regulation_of_progression_through_cell_cycle	0.039653	0.317152	0.580974	0.300911	0.540587	0.478302	0.348882	0.938893	0.671555	0.610335	0.23726	0.401983	0.794238	0.897672	0.722729	0.456094	1	0.887741	1	1	0.710941	0.681063	1	1	0.913485	0.840201	1	0.965052	0.938911	1	0.854414	0.423686	0.966336	0.660339	0.384584	1	0.411119	1	0.997268
GO:0045934_negative_regulation_of_nucleobase,_nucleoside,_nucleotide_and_nucleic_acid_metabolic_process	0.0644595	0.657117	0.254418	0.0126705	0.0115152	0.98193	0.985812	0.870662	0.353363	0.293912	0.286628	0.589357	1	0.655836	0.763261	0.88744	1	0.205275	0.777169	0.547341	0.959262	1	1	1	1	0.52783	1	1	1	0.709196	0.807853	0.965858	0.937113	0.555751	0.972439	1	0.597382	1	0.980282
GO:0016481_negative_regulation_of_transcription	0.158212	0.740769	0.198127	0.0082501	0.00520412	0.972598	0.977938	0.802257	0.394674	0.31979	0.217272	0.834322	1	0.569986	0.847484	0.858817	1	0.31187	0.739621	0.508555	0.94322	1	1	1	1	0.717113	1	1	1	0.66945	0.771997	0.975295	0.908403	0.738068	0.959997	1	0.838679	1	0.984566
GO:0051179_localization	0.637094	0.965324	0.705778	0.525647	0.954018	0.86774	0.300385	0.323398	0.982518	0.163485	0.558613	0.719793	0.826253	0.425983	0.856243	0.340993	0.0461608	0.41378	0.158515	1	0.392168	0.741839	0.851104	0.796213	0.365112	0.113505	0.790607	0.894558	0.718958	0.840072	0.908153	0.0380916	0.445477	0.992761	0.977166	0.932952	0.827188	0.576386	0.0385956
GO:0006810_transport	0.877582	0.969637	0.979811	0.523566	0.970241	0.887908	0.265743	0.540738	0.95578	0.23101	0.889012	0.734087	0.84223	0.28643	0.720514	0.140245	0.52608	0.424797	0.314603	1	0.316217	0.842341	0.845041	0.715678	0.572568	0.361382	0.981341	0.940075	0.95082	0.872806	0.897791	0.00613851	0.551183	0.994749	0.909047	0.819212	0.842341	0.500374	0.129807
GO:0051234_establishment_of_localization	0.841461	0.960224	0.972991	0.587003	0.93667	0.925296	0.350894	0.60496	0.950492	0.284574	0.884732	0.682043	0.871481	0.377529	0.80223	0.183341	0.347247	0.50793	0.36755	1	0.39422	0.877847	0.87567	0.755877	0.520662	0.183525	0.870259	0.88403	0.935314	0.800865	0.920918	0.00579932	0.645967	0.996965	0.939155	0.84663	0.877847	0.545954	0.126067
GO:0065008_regulation_of_biological_quality	0.992866	0.269336	0.349658	0.997222	0.671047	0.310853	0.638963	0.650451	0.577752	0.322423	0.961787	0.894447	0.972755	0.612864	0.792124	0.924187	0.200668	0.83763	0.334735	1	0.567877	0.771446	0.98302	0.352095	0.442736	0.937234	0.544635	0.980362	0.949102	0.619773	0.411202	0.0299184	0.990907	0.983665	0.813736	0.924277	0.970378	0.454455	0.722711
GO:0016192_vesicle-mediated_transport	0.555374	0.196107	1	0.991426	0.505276	0.968528	0.803426	0.771275	0.0577367	0.486521	0.51565	0.930479	0.529317	0.0320786	0.81819	0.541541	1	0.793537	0.585781	1	0.596502	0.268814	1	1	0.286007	0.887862	0.966338	1	0.603578	1	0.888368	0.605456	0.836322	0.980466	0.848234	0.724336	0.494021	0.129611	0.041003
GO:0016044_membrane_organization_and_biogenesis	0.490936	0.460796	1	0.850847	0.583484	0.959803	0.6505	0.997936	0.794626	0.0286869	0.552923	1	0.661689	0.284795	0.229737	0.244938	1	1	1	1	1	0.478325	1	0.610063	0.22635	0.181777	0.601069	1	0.289139	1	1	0.494026	0.871508	1	0.77725	1	0.804077	0.539909	0.698894
GO:0006325_establishment_and/or_maintenance_of_chromatin_architecture	0.726944	0.974997	0.923355	0.0657976	0.0569707	0.0354626	0.916947	0.856932	0.482151	0.994441	0.464642	0.858816	1	0.988652	0.386251	0.346489	0.542998	0.598492	0.42358	0.538661	0.81482	1	1	1	0.870591	0.937518	0.894976	0.939317	0.671784	1	1	0.98594	0.421828	0.779505	0.969961	1	1	0.611785	0.640904
GO:0006323_DNA_packaging	0.73573	0.975949	0.924949	0.0699258	0.0593784	0.0369419	0.919182	0.861637	0.490751	0.994727	0.47089	0.86106	1	0.98906	0.393597	0.351136	0.547392	0.604003	0.427616	0.541572	0.81835	1	1	1	0.872738	0.938919	0.897564	0.940692	0.676111	1	1	0.986724	0.428687	0.78332	0.970811	1	1	0.614779	0.655473
GO:0016568_chromatin_modification	0.918944	0.97389	1	0.339876	0.0408116	0.036886	0.932753	0.702301	0.809013	0.991602	0.400652	0.719845	1	0.945568	0.228704	1	0.697904	0.324684	0.241129	1	0.868709	1	1	1	0.735261	0.835067	0.918542	0.838168	0.780842	1	1	0.986376	0.301706	0.553922	1	1	1	1	0.227511
GO:0048856_anatomical_structure_development	0.834303	0.506176	0.785152	0.976509	0.633574	0.0267286	0.0864805	0.605564	0.066005	0.063013	0.475923	0.46873	0.706475	0.708155	0.601971	0.994721	0.620568	0.886138	0.897862	0.805727	0.816462	0.181246	0.995348	0.968311	0.657811	0.627377	0.292075	0.928231	0.941668	0.744609	0.194832	0.970848	0.804089	0.502594	0.930363	0.477867	0.61403	0.804642	0.999273
GO:0009653_anatomical_structure_morphogenesis	0.91961	0.822085	0.804267	0.97069	0.494261	0.0143301	0.184575	0.592107	0.122665	0.0582127	0.888511	0.827153	0.854901	0.481996	0.86913	0.878098	0.962838	0.931996	0.898939	0.770258	0.863104	0.252517	0.972855	0.92155	0.421189	0.36841	0.696949	0.997742	0.837207	0.620537	0.103461	0.672248	0.947541	0.686236	0.78782	0.858338	0.836688	0.858338	0.998463
GO:0032989_cellular_structure_morphogenesis	0.772791	0.862304	0.561138	0.9903	0.796585	0.0156328	0.299047	0.344549	0.452842	0.0137717	0.918925	0.955155	0.876894	0.68563	0.987711	1	0.783797	0.958355	0.902095	1	0.71271	0.817981	1	1	0.385978	0.621751	0.37525	0.988248	0.703991	0.852166	0.717478	0.961352	0.967548	0.653948	0.910611	1	0.817981	1	0.922497
GO:0000902_cell_morphogenesis	0.772791	0.862304	0.561138	0.9903	0.796585	0.0156328	0.299047	0.344549	0.452842	0.0137717	0.918925	0.955155	0.876894	0.68563	0.987711	1	0.783797	0.958355	0.902095	1	0.71271	0.817981	1	1	0.385978	0.621751	0.37525	0.988248	0.703991	0.852166	0.717478	0.961352	0.967548	0.653948	0.910611	1	0.817981	1	0.922497
GO:0009887_organ_morphogenesis	0.898753	0.802097	0.492641	0.794505	0.573864	0.309022	0.528876	0.240001	0.0485699	0.438253	0.96537	1	1	0.602656	0.858369	0.810736	1	0.989761	1	1	0.939143	0.537219	1	0.811319	0.791931	0.908151	0.913578	1	0.848861	0.514631	0.399672	0.963201	0.870576	1	0.961464	0.747091	0.944233	1	0.99999
GO:0040007_growth	0.61817	0.734442	0.193968	0.995092	0.664598	0.00221713	0.0295338	0.795982	0.243773	0.62749	0.623152	1	1	0.562915	1	1	0.492804	0.776252	0.736488	1	0.77182	0.53325	1	1	0.54881	1	0.970149	1	0.621125	1	0.423791	0.857648	0.905751	0.733583	1	1	1	1	0.983045
GO:0040008_regulation_of_growth	0.853849	0.724858	0.516751	0.999773	0.664095	0.00418409	0.297802	0.962856	0.467127	0.534297	0.697493	1	1	0.804969	1	1	1	0.627758	0.632094	1	0.881352	0.386498	1	1	0.400253	1	1	1	0.79682	1	0.666661	0.98963	0.949983	0.860801	1	1	1	1	0.947353
GO:0008361_regulation_of_cell_size	0.663004	0.866471	1	0.999588	0.614518	0.0100596	0.476542	0.847282	0.235669	0.664884	0.897439	1	1	0.298335	1	1	1	1	0.604932	1	0.582476	0.352464	1	1	0.365529	1	0.695953	1	1	1	0.639527	0.984396	1	1	0.891545	1	1	1	0.911482
GO:0016049_cell_growth	0.638028	0.856742	1	0.999497	0.59695	0.00877776	0.459585	0.834612	0.218318	0.644813	0.891296	1	1	0.282478	1	1	1	1	0.595449	1	0.568395	0.340979	1	1	0.353789	1	0.9077	1	1	1	0.630009	0.982139	1	1	1	1	1	1	0.895619
GO:0001558_regulation_of_cell_growth	0.67504	0.797812	1	1	0.501791	0.0160233	0.37191	0.90887	0.277014	0.5334	0.85466	1	1	0.686691	1	1	1	1	0.54458	1	0.813005	0.282844	1	1	0.294198	1	1	1	1	1	1	0.994634	1	1	1	1	1	1	0.870228
GO:0006508_proteolysis	0.732533	0.353774	0.72396	0.170535	0.156539	0.456745	0.671164	0.319751	0.974452	0.885714	0.914025	0.893034	0.925127	0.744409	0.862521	0.777394	0.268791	0.942525	0.301779	1	0.940097	0.979728	0.946716	0.00520199	0.547045	0.777188	0.107758	0.00595649	0.652328	1	0.0309764	0.801218	0.440936	0.917003	0.798459	0.267175	0.979728	0.843798	0.308979
GO:0048869_cellular_developmental_process	0.743101	0.0236719	0.0804698	0.258186	0.162659	0.701291	0.201532	0.137215	0.579477	0.179594	0.81482	0.961866	0.856981	0.761462	0.896105	0.901201	0.789276	0.876421	0.998024	0.93546	0.868242	0.49946	0.832458	0.594115	0.669953	0.21298	0.0734488	0.0193471	0.819621	0.643837	0.980691	0.552915	0.908901	0.919394	0.399332	0.769631	0.369336	0.769631	0.871767
GO:0030154_cell_differentiation	0.743101	0.0236719	0.0804698	0.258186	0.162659	0.701291	0.201532	0.137215	0.579477	0.179594	0.81482	0.961866	0.856981	0.761462	0.896105	0.901201	0.789276	0.876421	0.998024	0.93546	0.868242	0.49946	0.832458	0.594115	0.669953	0.21298	0.0734488	0.0193471	0.819621	0.643837	0.980691	0.552915	0.908901	0.919394	0.399332	0.769631	0.369336	0.769631	0.871767
GO:0012501_programmed_cell_death	0.960054	0.213872	0.186115	0.153962	0.375588	0.930704	0.582748	0.574282	0.975944	0.431711	0.89052	0.961497	0.651926	0.934238	0.976693	0.788855	0.991788	0.901345	0.97809	1	0.798487	0.740732	0.896952	0.555713	0.4014	0.540199	0.0521478	0.0432504	0.701153	0.589493	0.919019	0.095411	0.652807	0.93622	0.50672	0.696983	0.375054	0.91516	0.655186
GO:0006915_apoptosis	0.973563	0.288305	0.29726	0.140578	0.361884	0.926763	0.570229	0.557198	0.973701	0.414696	0.885172	0.959859	0.645369	0.930166	0.989992	0.905971	0.99139	0.896742	0.977249	1	0.790902	0.733773	0.893798	0.549051	0.392522	0.529781	0.0486674	0.0406554	0.692985	0.582819	0.916302	0.0868743	0.640695	0.933107	0.4949	0.691813	0.366438	0.913073	0.626641
GO:0042981_regulation_of_apoptosis	0.922492	0.193321	0.492516	0.111014	0.420961	0.837572	0.617147	0.250081	0.859701	0.312995	0.778705	0.973859	0.914465	0.963007	0.907572	0.903363	0.967556	0.824979	1	1	0.490719	0.483188	0.938055	0.62163	0.305928	0.560838	0.149399	0.127802	0.928715	0.648337	1	0.0306389	0.89983	0.76987	0.28886	0.516114	0.880365	1	0.788321
GO:0043067_regulation_of_programmed_cell_death	0.925273	0.197512	0.496441	0.115388	0.426448	0.840356	0.621823	0.255651	0.863065	0.319067	0.781974	0.974284	0.915407	0.963935	0.909701	0.904722	0.968054	0.827594	1	1	0.495046	0.486649	0.938827	0.624062	0.309135	0.564817	0.152389	0.130125	0.929833	0.650749	1	0.032105	0.901901	0.77286	0.292929	0.518506	0.88191	1	0.796641
GO:0065009_regulation_of_a_molecular_function	0.126603	0.39202	0.593519	0.0207634	0.28652	0.95343	0.653406	0.95719	0.635481	0.261422	0.684786	0.960639	0.887265	0.571754	0.582713	0.447014	0.802586	0.965029	1	1	0.123586	0.211319	0.699959	0.110428	0.415614	0.456541	0.269409	0.832967	1	0.863575	1	0.901843	0.924646	0.685156	0.924055	1	1	1	0.951899
GO:0050790_regulation_of_catalytic_activity	0.157593	0.893319	0.701933	0.0119593	0.561704	0.914824	0.835069	0.951484	0.834098	0.203633	0.562823	0.939912	0.850028	0.750149	0.729514	0.346839	1	0.938665	1	1	0.0675754	0.14279	0.625332	0.482518	0.319082	0.342672	0.164833	0.755984	1	0.822983	1	0.921042	0.947447	0.774125	0.872303	1	1	1	0.858006
GO:0043085_positive_regulation_of_catalytic_activity	0.0414346	1	0.611118	0.00492561	0.57558	0.82274	0.8468	0.983787	0.973259	0.349246	0.546172	1	1	0.875091	0.589243	1	1	0.922802	1	1	0.234821	0.473144	0.702947	0.233396	0.810056	0.65254	0.816224	0.897325	1	0.624417	1	0.882181	0.867887	0.904384	0.942004	1	1	1	0.469981
GO:0006512_ubiquitin_cycle	0.0144519	0.935541	0.757058	0.354975	0.905574	0.222467	0.633835	0.894813	0.711137	0.776328	1	1	1	0.500407	0.974259	0.183901	1	0.646296	0.792656	1	0.965062	0.622821	0.798993	0.341793	0.36325	0.793311	0.374564	0.798085	0.709103	0.0367209	0.23869	0.877471	0.947288	0.811829	0.976802	1	1	1	0.830691
GO:0044249_cellular_biosynthetic_process	0.949175	0.632191	0.114192	0.667758	0.593654	0.88142	0.645602	0.802194	0.814936	0.933008	0.708579	0.825819	0.904005	0.511966	0.400611	0.998406	0.909145	0.954275	0.98805	0.903385	0.801688	0.343634	0.432039	0.424266	0.710485	0.691826	0.0454131	0.557376	0.671184	0.873599	0.99228	0.771238	0.715806	0.592973	0.417145	0.770687	0.511698	0.94264	0.0233865
GO:0009059_macromolecule_biosynthetic_process	0.75318	0.688861	0.0132713	0.347881	0.808641	0.901953	0.848218	0.937766	0.966038	0.997429	0.978875	0.564505	1	0.182914	0.993986	0.988564	0.978978	0.769329	0.953716	0.471373	0.440231	0.21064	0.590169	0.200925	0.7911	0.323911	0.0439384	0.928085	0.0439334	1	0.846091	0.919104	0.785213	0.842685	0.406588	0.862506	0.917336	0.862506	0.00840445
GO:0006412_translation	0.980427	0.471728	0.0213234	0.425596	0.818661	0.608354	0.659432	0.878598	0.982835	0.990014	0.993148	0.748887	1	0.722386	0.972848	1	1	0.61801	0.868924	0.657931	0.410195	0.279369	0.606259	0.0678436	0.770101	0.728193	0.143912	0.897118	0.386243	1	0.89274	0.831692	0.938517	0.906587	0.85666	0.730732	0.936388	0.730732	0.109532
GO:0009057_macromolecule_catabolic_process	0.71964	0.787011	0.18203	0.528315	0.23967	0.484277	0.958579	0.941139	0.901781	0.474233	1	1	1	0.602874	0.860841	0.92341	1	0.890008	0.828979	1	0.886909	0.415369	0.53036	1	0.914928	0.637359	0.666051	0.230399	0.293346	0.766086	0.0397082	0.989315	0.892646	0.859087	0.985367	1	0.684678	0.680275	0.367159
GO:0044265_cellular_macromolecule_catabolic_process	0.660202	0.892296	0.0867574	0.661091	0.320717	0.703174	1	0.820173	0.951484	0.345822	1	1	1	0.389618	0.704158	1	1	0.948836	0.748801	1	0.788368	0.277325	0.404384	1	1	0.926773	0.473961	0.256757	0.6402	0.679068	0.0157865	0.998902	0.984056	0.751142	1	1	0.846342	0.590187	0.430846
GO:0009790_embryonic_development	0.892083	0.686939	0.888205	0.112775	0.244636	1	0.865536	0.587767	0.665066	0.396647	0.806493	0.224287	1	0.724423	0.810186	0.536449	0.459165	1	0.713501	1	1	0.498741	0.720479	1	1	1	0.836856	0.908395	0.0445158	1	1	0.988278	1	1	0.795318	1	0.816354	0.553873	0.997466
GO:0048518_positive_regulation_of_biological_process	0.122947	0.0538674	0.0174721	0.905097	0.534753	0.6406	0.811725	0.0444938	0.517509	0.339078	0.394859	0.259711	0.709742	0.881031	0.75272	0.997039	0.967036	0.97417	1	0.781392	0.793368	0.725919	0.62982	0.0469877	0.302823	0.991807	0.726409	0.41104	0.852703	0.820799	0.983288	0.88026	0.486596	0.901079	0.475213	0.443723	0.978253	1	0.632628
GO:0048522_positive_regulation_of_cellular_process	0.0650719	0.0295059	0.0329255	0.878858	0.562735	0.485674	0.866715	0.0183471	0.48848	0.548876	0.48256	0.612566	0.628447	0.858633	0.692062	0.99388	0.985553	0.947256	1	0.728879	0.885338	0.779853	0.535179	0.160634	0.490946	0.982317	0.88094	0.550586	0.774952	0.761112	0.971699	0.880322	0.54164	0.986703	0.447438	0.366182	0.961438	1	0.57768
GO:0009893_positive_regulation_of_metabolic_process	0.058892	0.181643	0.0056758	0.913309	0.901226	0.241491	0.62787	0.363511	0.942119	0.463229	0.851311	0.73071	0.519501	0.692522	0.664489	0.942188	0.699212	0.92099	1	1	0.58204	0.481912	0.308983	0.187807	0.75247	1	0.994253	0.885227	0.814425	0.80048	1	0.877587	0.82577	0.895356	0.990785	1	0.929799	1	0.81523
GO:0031325_positive_regulation_of_cellular_metabolic_process	0.084318	0.21698	0.0110991	0.9125	0.862363	0.18391	0.553944	0.389975	0.910823	0.640735	0.80934	0.909974	0.802996	0.620748	0.58412	0.927339	0.654982	0.896558	1	1	0.516232	0.428066	0.266684	0.158516	0.919118	1	0.991308	0.855052	0.776457	0.772948	1	0.890081	0.773489	0.866654	0.98658	1	0.913131	1	0.751068
GO:0045941_positive_regulation_of_transcription	0.197164	0.146426	0.00974739	0.877616	0.859694	0.300773	0.343856	0.254059	0.881504	0.677438	0.658192	1	1	0.793825	0.530712	1	0.5206	0.800468	1	1	0.796244	0.561547	0.412728	0.294516	1	1	1	0.744391	0.893543	1	1	0.794837	0.782591	0.759547	1	1	0.85125	1	0.827059
GO:0045935_positive_regulation_of_nucleobase,_nucleoside,_nucleotide_and_nucleic_acid_metabolic_process	0.162567	0.093732	0.0125887	0.836669	0.740143	0.337392	0.383074	0.301796	0.903501	0.7229	0.690858	1	1	0.820636	0.57519	1	0.547392	0.822357	1	1	0.81835	0.588628	0.437422	0.314853	1	1	1	0.768739	0.90507	1	1	0.724701	0.81011	0.78332	1	1	0.865066	1	0.879629
GO:0051674_localization_of_cell	0.188376	0.814724	0.160902	0.636294	0.858149	0.663666	0.378702	0.0340893	0.925619	0.591153	0.251579	0.944596	0.858018	0.30393	0.981045	1	0.0155798	0.667146	0.353247	1	0.463974	0.548648	0.64069	0.49742	0.568269	0.766554	0.473691	0.91602	0.43252	0.831611	0.907375	0.985982	0.433813	0.790266	1	1	0.548648	1	0.148862
GO:0006928_cell_motility	0.188376	0.814724	0.160902	0.636294	0.858149	0.663666	0.378702	0.0340893	0.925619	0.591153	0.251579	0.944596	0.858018	0.30393	0.981045	1	0.0155798	0.667146	0.353247	1	0.463974	0.548648	0.64069	0.49742	0.568269	0.766554	0.473691	0.91602	0.43252	0.831611	0.907375	0.985982	0.433813	0.790266	1	1	0.548648	1	0.148862
GO:0007267_cell-cell_signaling	0.635287	0.854457	0.404275	0.910852	0.6561	0.8244	0.266912	0.0242251	0.625118	0.643517	0.933002	0.852498	0.61601	0.983258	0.985537	0.753091	0.444104	0.946186	0.265518	1	0.981534	0.95474	0.975071	1	0.354131	0.647164	0.69538	0.657203	0.978047	1	0.981269	0.968781	0.0265765	0.993269	0.84328	0.668608	0.95474	1	0.977385
GO:0007268_synaptic_transmission	0.4666	0.989903	0.576307	0.506978	0.983041	0.472305	0.103771	0.0106008	0.895322	0.602534	0.98604	0.669573	1	0.895059	0.984514	1	0.887991	0.97644	1	1	1	1	0.830723	1	0.692648	0.628156	0.828678	0.6352	1	1	1	0.988082	0.238837	0.85383	0.917828	0.302311	1	1	0.887607
GO:0019226_transmission_of_nerve_impulse	0.507789	0.994706	0.647073	0.560552	0.990503	0.565099	0.158665	0.0025807	0.938053	0.71708	0.948644	0.724413	1	0.830183	0.991427	1	0.69272	0.917617	0.855588	1	1	1	0.860997	1	0.746345	0.478438	0.877445	0.704098	1	1	1	0.985792	0.195114	0.891345	0.833248	0.346927	1	1	0.900869
GO:0007417_central_nervous_system_development	0.173283	0.753081	0.909337	0.395302	0.991507	0.697597	0.896886	0.0357427	0.740641	0.653008	1	1	1	0.98479	0.697706	1	0.506825	1	1	1	1	0.547549	1	1	0.852077	0.726112	0.68782	0.927113	0.635502	1	0.777913	0.941165	0.366648	0.746847	0.624313	1	0.843828	1	0.997783
GO:0000278_mitotic_cell_cycle	0.515556	0.0288484	0.0289801	0.0696628	0.313624	0.974296	0.174148	0.516459	0.579218	0.903749	0.640967	0.839534	1	0.779224	0.697706	0.585894	1	0.947501	0.745777	1	0.784332	1	1	1	0.563176	0.925095	0.68782	0.927113	1	1	1	0.500701	0.767653	0.932847	0.834972	0.587008	1	1	0.414553
GO:0022403_cell_cycle_phase	0.548171	0.0583936	0.0159868	0.0983407	0.264171	0.984107	0.251769	0.64732	0.697191	0.98243	0.507792	0.873802	1	0.679843	0.784199	0.378934	1	0.842088	0.787615	1	0.629761	0.877616	1	1	0.63014	0.9467	0.764402	0.948321	1	1	1	0.65056	0.834655	1	0.881627	0.632278	1	1	0.366965
GO:0007067_mitosis	0.567372	0.1585	0.026642	0.0452092	0.240692	0.928724	0.290431	0.362703	0.654102	0.992977	0.691225	0.732865	1	0.7996	0.443278	1	1	1	1	1	1	1	1	1	0.394522	0.845817	0.469093	0.848824	1	1	1	0.604061	0.790483	1	0.9059	1	1	1	0.122438
GO:0000087_M_phase_of_mitotic_cell_cycle	0.567372	0.1585	0.026642	0.0452092	0.240692	0.928724	0.290431	0.362703	0.654102	0.992977	0.691225	0.732865	1	0.7996	0.443278	1	1	1	1	1	1	1	1	1	0.394522	0.845817	0.469093	0.848824	1	1	1	0.604061	0.790483	1	0.9059	1	1	1	0.122438
GO:0000279_M_phase	0.656774	0.166819	0.00471693	0.100285	0.118288	0.962287	0.439037	0.568762	0.806981	0.997875	0.566247	0.805651	1	0.712286	0.612642	0.832015	1	0.928524	1	1	0.92675	0.810313	1	1	0.503814	0.901744	0.614364	0.904117	1	1	1	0.666311	0.878479	1	0.946762	1	1	1	0.160073
GO:0051301_cell_division	0.751662	0.0836565	0.0304299	0.106486	0.679564	0.502544	0.541754	0.754283	0.845801	0.737311	0.918753	0.745287	1	0.815329	0.274845	0.432284	1	1	1	1	1	1	1	1	0.41164	0.570694	0.492486	1	1	1	1	0.787708	0.95342	1	0.913592	1	1	1	0.156199
GO:0009889_regulation_of_biosynthetic_process	0.76787	0.107203	0.0171449	0.975987	0.806553	0.905175	1	0.642888	0.983348	0.80822	1	0.691902	0.548152	0.932342	1	1	1	0.559032	1	1	0.55398	0.329435	0.592881	1	1	0.811291	0.668197	1	1	1	1	0.490582	1	1	0.878515	1	1	1	0.221957
GO:0031326_regulation_of_cellular_biosynthetic_process	0.980681	0.070275	0.0108767	0.956466	0.753111	0.877847	1	0.55257	0.974137	0.901542	1	0.650335	1	0.909622	1	1	1	0.497965	1	1	0.493049	0.282844	0.551592	1	1	0.774242	0.606678	1	1	1	1	0.746673	1	1	0.847616	1	1	1	0.280325
GO:0006396_RNA_processing	0.317715	0.0493109	1	0.325356	0.938135	0.968861	0.878997	0.459537	0.696891	0.879915	1	1	1	0.747505	0.829702	0.848644	1	0.516416	0.365736	1	0.937126	1	1	0.63817	1	1	0.652456	1	1	1	1	0.969212	1	0.458778	0.81209	0.567425	0.247485	0.567425	0.922013
GO:0022607_cellular_component_assembly	0.317021	0.0193776	0.557611	0.769652	0.865004	0.948714	0.908067	0.775234	0.416196	0.995905	0.385539	1	0.929175	0.93737	0.667113	0.0204897	0.879574	0.734668	1	1	0.985632	0.338517	0.794747	0.386084	0.983403	0.790929	0.999563	0.996363	0.990733	0.910738	0.827632	0.82548	0.972999	1	1	1	0.904285	0.555759	0.362523
GO:0065003_macromolecular_complex_assembly	0.203446	0.0200163	0.685303	0.73301	0.89901	0.926306	0.944581	0.684792	0.31397	0.997321	0.627962	1	0.914465	0.908877	0.712594	0.0133334	0.852425	0.674131	1	1	0.978973	0.483188	0.759971	0.343099	0.977771	0.882296	0.999241	0.994573	0.987062	0.893963	0.795285	0.928196	0.987095	1	1	1	0.880365	0.516114	0.308523
GO:0046907_intracellular_transport	0.606238	0.644356	1	0.0497213	0.27584	0.984259	0.964365	0.957317	0.544694	0.90508	0.704558	0.980878	1	0.244715	0.676652	0.401656	1	0.869419	0.789568	1	0.403337	0.753016	0.951207	0.184114	0.770154	0.913022	0.94687	0.996531	0.94736	0.912532	1	0.760588	0.992558	0.997095	0.9703	1	0.90679	1	0.0224296
GO:0006886_intracellular_protein_transport	0.720995	0.566228	1	0.0139686	0.108994	0.994148	0.779748	0.735313	0.348698	0.90673	0.483112	1	1	0.676806	0.900656	0.516662	1	0.984046	0.85383	1	0.567294	0.728727	0.859271	0.180917	0.743235	0.875137	0.993677	1	1	1	1	0.925346	0.996852	0.977457	0.989949	1	0.926258	1	0.0152323
GO:0016311_dephosphorylation	0.453308	0.533913	1	0.556507	0.926817	0.865694	1	0.728818	0.118883	0.297294	0.841448	1	0.491878	1	1	1	0.610901	0.801319	1	1	0.798313	1	1	1	1	1	0.861575	0.00261774	1	1	0.561838	0.866426	0.894581	1	1	1	1	1	0.335472

## Sheet: Table S6B
Table S6B. Significant GO nodes correlated with cell type specific and ubiquitous CTCF binding sites across 38 cell types
Description	C7	C19	C33	C36	C27	C2	C6	C4	C5	C29	C20	C30	C18	C21	C37	C1	C12	C14	C16	C11	C13	C35	C15	C22	C8	C9	C31	C32	C23	C28	C3	C38	C24	C34	C26	C25	C10	C17
GO0006796	8.91e-05	0.00465515	0.00387584	0.00111155	0.0275725	1.04e-05	0.000835616	0.00112115	0.000348366	4.57e-05	0.000876178	8.49e-06	5.63e-05	0.0205829	0.00749304	0.00376011	0.000646065	2.91e-06	0.000509073	5.16e-05	1.36e-05	0.00625106	0.000364562	0.00101782	1.94e-05	0.000247339	0.00412144	0.00396221	0.0261838	0.0104682	0.00216104	0.0893965	0.0182901	0.000751755	0.0031901	0.00127913	0.00612327	0.00190045
GO0006793	8.91e-05	0.00465515	0.00387584	0.00111155	0.0275725	1.04e-05	0.000835616	0.00112115	0.000348366	4.57e-05	0.000876178	8.49e-06	5.63e-05	0.0205829	0.00749304	0.00376011	0.000646065	2.91e-06	0.000509073	5.16e-05	1.36e-05	0.00625106	0.000364562	0.00101782	1.94e-05	0.000247339	0.00412144	0.00396221	0.0261838	0.0104682	0.00216104	0.0893965	0.0182901	0.000751755	0.0031901	0.00127913	0.00612327	0.00190045
GO0043687	0.00378505	0.0165846	0.000439095	5.84e-05	0.00941888	3.52e-05	0.000391445	0.00107935	0.000743857	0.0012878	0.00174971	0.000106012	0.000376502	0.0050969	0.00399224	0.000784545	6.49e-05	0.000161143	0.00109367	0.000136689	0.000165519	0.00201214	0.00105017	0.0018296	0.000184546	0.00418489	0.0386482	0.0350694	0.0734367	0.0155573	0.00116928	0.220429	0.0190631	0.00122289	0.0256774	0.0181014	0.104996	0.00623732
GO0006470	0.000104431	0.00069918	0.00235461	0.000658624	0.00567854	0.000620058	0.000247569	0.000428261	0.00071884	0.000324447	0.00196831	5.52e-05	0.0093844	0.00275649	0.00679072	0.00677442	0.00717015	0.00289091	0.0129291	0.0212091	0.00888513	0.00164482	0.0117927	0.000160693	0.000131027	0.00478216	0.00372241	0.0268073	0.0376187	0.0126191	0.00309789	0.024391	0.0204974	0.0272502	0.0536986	0.112031	0.236556	0.045315
GO0016311	0.000208606	0.001947	0.00367532	0.00110907	0.00986821	0.000799124	0.00033676	0.000722719	0.000374644	0.000548013	0.00257028	7.93e-05	0.010216	0.00717088	0.00581976	0.0133009	0.00813535	0.00378614	0.014811	0.0234653	0.00498393	0.00241772	0.0134909	0.000251515	0.000221407	0.00538416	0.00462769	0.0297725	0.0530253	0.0116092	0.00364313	0.0347954	0.0170258	0.0302721	0.0671217	0.141685	0.226837	0.0353466
GO0016192	0.0013439	0.00112972	0.00166392	0.00154444	0.0253239	0.0069032	0.0112902	0.0137763	0.0392332	0.00629494	0.0431936	0.00425345	0.00457239	0.0368419	0.246951	0.0035051	0.00409472	0.00279614	0.0361179	0.0195291	0.00929231	0.0467486	0.00987823	0.00972561	0.0363593	0.00318633	0.00284431	0.0570618	0.052683	0.0243561	0.0768943	0.000971053	0.189347	0.0092218	0.0205332	0.0392984	0.0024505	0.0179411
GO0044260	0.031	0.00581911	0.00125064	3.47e-05	0.0180916	0.000732341	6.79e-05	0.000480401	0.000563644	0.00289307	0.00182329	0.00122219	0.0160771	0.000118479	0.0045759	0.000382804	2.12e-05	3.22e-05	0.000278639	1.44e-05	6.85e-06	0.00317105	0.0110717	0.000534301	6.47e-06	0.000985756	0.0492099	0.0480197	0.167862	0.00212444	0.00575197	0.27038	0.00101433	0.00151381	0.00442014	0.00180979	0.00441172	0.00281455
GO0044267	0.0411	0.00761897	0.00145121	7.65e-05	0.0235587	0.001619	9.73e-05	0.000991319	0.00098453	0.00452129	0.00343937	0.00270426	0.0216162	0.000141181	0.0103251	0.000737218	4.21e-05	5.17e-05	0.000470671	2.71e-05	9.88e-06	0.00267604	0.0138045	0.00103621	2.49e-05	0.00179835	0.0865298	0.0653697	0.222458	0.00611563	0.0135445	0.374343	0.00193075	0.00297181	0.0123085	0.00321378	0.015158	0.00715297
GO0006464	0.0179561	0.018433	0.00153901	0.000162528	0.0240336	0.000382846	0.00153231	0.00172909	0.00207327	0.00238134	0.0107311	0.00106394	0.00338335	0.00674585	0.02372	0.00209174	0.000445285	0.000851704	0.00159586	0.000155159	0.000160152	0.00531442	0.00193786	0.00363599	0.000531117	0.0032029	0.0369824	0.0566554	0.100534	0.0139892	0.00764605	0.288452	0.0166396	0.00105283	0.0560507	0.0456802	0.18226	0.0146619
GO0043412	0.0225467	0.0343925	0.00222502	0.000343839	0.0580102	0.000806357	0.00223745	0.00383812	0.00230267	0.00496787	0.0159374	0.00112624	0.00438476	0.00457491	0.0239952	0.00340643	0.000682424	0.00118719	0.00330646	0.00013971	0.00019337	0.0099891	0.00228137	0.00604622	0.00149935	0.0054143	0.0590084	0.0998528	0.160773	0.0191676	0.0100699	0.343883	0.00931886	0.00230055	0.0683681	0.0693287	0.137805	0.0178211
GO0019538	0.0386897	0.0149563	0.00123021	4.31e-05	0.0188026	0.00144149	0.000160305	0.00157855	0.000933866	0.00401746	0.0139389	0.00723155	0.0187756	8.3e-05	0.0241765	0.000405592	5.25e-05	1.83e-05	0.000565966	1.83e-05	5.87e-06	0.00610441	0.0141521	0.00163142	3.99e-05	0.00164834	0.116572	0.0877606	0.307525	0.00352514	0.0135208	0.497519	0.000816533	0.00429082	0.00760283	0.0054408	0.0130649	0.0104016
GO0006468	0.0123042	0.0908062	0.0513965	0.0725607	0.118472	0.00152333	0.022296	0.00270645	0.00451844	0.00250041	0.00865602	0.000767402	0.000694125	0.195669	0.0617475	0.020552	0.0021185	0.00112715	0.00804379	0.00166527	0.000980246	0.0207008	0.00944651	0.0204968	0.00879817	0.0180421	0.0740782	0.0355288	0.0496856	0.0270277	0.00595894	0.336785	0.0649724	0.00488143	0.0129251	0.00728933	0.0217253	0.0164852
GO0016310	0.0118856	0.0759037	0.0915544	0.0710534	0.230747	0.00280884	0.0603237	0.039467	0.0424875	0.00784625	0.0250673	0.00407076	0.00160253	0.147684	0.0860421	0.0484433	0.0135447	0.000652894	0.0149741	0.0012186	0.00213668	0.097695	0.0121152	0.042023	0.00609015	0.0105736	0.102007	0.0532226	0.115445	0.118873	0.0468338	0.468685	0.139704	0.0104824	0.0388968	0.00598798	0.0358881	0.0327824
GO0045184	0.0047327	0.0243123	0.0555238	0.0759518	0.090217	0.0176923	0.0137858	0.120401	0.0297326	0.0170527	0.0217678	0.0270621	0.00207076	0.000653736	0.0827722	0.0235634	0.0404107	0.00560618	0.0268785	0.0610585	0.000344101	0.0212177	0.0686211	0.0464688	0.0913619	0.0203825	0.0394595	0.0906628	0.080374	0.0332221	0.0475495	0.268434	0.00555992	0.0329471	0.150587	0.0849824	0.0181858	0.117209
GO0015031	0.00349892	0.0308602	0.0474181	0.052071	0.063644	0.0284301	0.016114	0.1137	0.0345799	0.0208532	0.0313858	0.043779	0.00382753	0.000677113	0.0689693	0.0227926	0.0359042	0.00550033	0.0298101	0.0532062	0.000597652	0.013824	0.0772874	0.0365785	0.11578	0.0251302	0.0733952	0.0789902	0.0963907	0.0527188	0.0564811	0.272079	0.00814495	0.0361848	0.231637	0.127996	0.015289	0.13707
GO0008104	0.0107539	0.0327178	0.0735261	0.0755973	0.0542141	0.0418999	0.0189884	0.17202	0.0295431	0.0166719	0.0421302	0.0450836	0.00894781	0.00144072	0.139973	0.0401438	0.0656858	0.0134709	0.0372479	0.0778232	0.000970125	0.0472672	0.0689404	0.0294961	0.102162	0.0259363	0.0416531	0.114351	0.0780249	0.08801	0.05904	0.248083	0.023893	0.0749943	0.31891	0.0826843	0.0324376	0.165552
GO0006886	0.00166104	0.0656006	0.141136	0.10416	0.177008	0.064935	0.0350496	0.0963016	0.0388716	0.0275774	0.0574375	0.0227066	0.0109653	0.00165462	0.0921656	0.0466911	0.0619884	0.00240105	0.0349412	0.0187906	0.00129285	0.0418685	0.142153	0.0291513	0.0876001	0.0264636	0.0875022	0.055547	0.0787201	0.0281659	0.0570829	0.22746	0.00327281	0.0285674	0.0831046	0.185808	0.00102553	0.0500799
GO0051649	0.0134864	0.0687287	0.0648131	0.0635004	0.136812	0.112003	0.0118569	0.166864	0.18988	0.152572	0.0241336	0.114088	0.0176798	0.0278067	0.263078	0.0934844	0.0184269	0.00014915	0.0444469	0.0245405	0.00430619	0.0577785	0.0962037	0.0234486	0.0712304	0.0575496	0.0231056	0.153704	0.0147338	0.164482	0.204282	0.154507	0.0446794	0.0137964	0.112633	0.0216972	0.00661196	0.0573169
GO0051641	0.00789935	0.0763821	0.0541669	0.102314	0.159049	0.0977766	0.0101268	0.198201	0.168837	0.125259	0.0221131	0.0981922	0.0145298	0.026071	0.303608	0.0994223	0.0209429	0.000149666	0.0508528	0.0370273	0.00732609	0.0574372	0.129105	0.0219149	0.0858364	0.0613849	0.011571	0.167415	0.00740594	0.150996	0.180219	0.171821	0.0366099	0.016733	0.102965	0.020871	0.0055197	0.056265
GO0046907	0.00967106	0.0645015	0.0555527	0.152054	0.198471	0.13111	0.0161889	0.186751	0.150882	0.094238	0.0328244	0.0723001	0.0398402	0.00970275	0.308368	0.106538	0.0354871	0.000304466	0.0407788	0.0304454	0.002375	0.068891	0.184498	0.0288786	0.0595204	0.024408	0.07474	0.0798609	0.0233268	0.096214	0.114618	0.405508	0.0123931	0.0203399	0.141773	0.0603101	0.00160164	0.0482105
GO0033036	0.0244292	0.0497444	0.104442	0.105731	0.111213	0.0862606	0.0337382	0.257428	0.0503261	0.0343334	0.0902504	0.112684	0.0224597	0.00205332	0.175005	0.0581035	0.101751	0.0145327	0.0631731	0.14682	0.00335612	0.0519536	0.0870432	0.0678379	0.160793	0.056343	0.0887634	0.203088	0.0768408	0.175285	0.114547	0.323311	0.0566128	0.11767	0.447271	0.102561	0.0570062	0.230213
GO0045045	0.0127194	0.125625	0.0262809	0.0104698	0.101226	0.106678	0.0132911	0.0267243	0.0452906	0.155641	0.0530092	0.0884938	0.0270294	0.247696	0.0783	0.0511757	0.00627523	0.0127983	0.0643562	0.00988008	0.119694	0.0889114	0.0107004	0.0222941	0.21876	0.12213	0.00761653	0.161516	0.0513048	0.246005	0.149231	0.0180422	0.290934	0.0425817	0.0232525	0.0529125	0.0443357	0.0219165
GO0032940	0.0369054	0.123575	0.0652995	0.0178044	0.167143	0.0896175	0.0128123	0.0373783	0.064322	0.169128	0.0324888	0.0723208	0.0226647	0.344323	0.153856	0.0815242	0.0117618	0.0154699	0.0598321	0.010414	0.0426381	0.204671	0.0113569	0.0417668	0.155301	0.0969366	0.00466576	0.201218	0.0373079	0.148907	0.122445	0.0224882	0.212083	0.0143395	0.0200245	0.022446	0.0488423	0.0131137
GO0048193	0.0328918	0.119483	0.0830661	0.2691	0.202082	0.0923951	0.0417531	0.133483	0.0165276	0.228514	0.13449	0.00406525	0.151708	0.32853	0.429737	0.095801	0.0401707	0.0313625	0.0537734	0.00629868	0.0446416	0.213182	0.111628	0.0302773	0.0944778	0.0329627	0.0596498	0.222904	0.0920452	0.0527089	0.088349	0.4319	0.0567086	0.0226607	0.0157116	0.188313	0.0148984	0.00364351
GO0044262	0.0803527	0.506565	0.0196148	0.0916372	0.0321642	0.0380304	0.0574646	0.045017	0.0436444	0.135454	0.00382883	0.0580362	0.0905867	0.203293	0.0462144	0.0780774	0.0362948	0.0167701	0.00344712	0.0117128	0.0466911	0.110592	0.0203281	0.0513858	0.00332299	0.00191254	0.0450836	0.0388833	0.0233306	0.0323662	0.033413	0.00689689	0.0332933	0.0268193	0.0292156	0.108777	0.0155476	0.000676395
GO0005975	0.181767	0.567183	0.159746	0.15096	0.0332586	0.0982095	0.168478	0.105925	0.0466882	0.141105	0.0277794	0.157422	0.247921	0.242517	0.0629841	0.248905	0.0522408	0.139306	0.0318712	0.0246907	0.152231	0.18166	0.159946	0.0757853	0.0114966	0.00646011	0.0800736	0.0506579	0.0331201	0.0468549	0.146138	0.00635111	0.039377	0.026584	0.0310766	0.195301	0.0631693	0.00141977
GO0005996	0.0719832	0.431336	0.0460845	0.155647	0.0157621	0.0835308	0.0522429	0.0810071	0.0904167	0.168603	0.0198532	0.236921	0.0589879	0.0801859	0.0368791	0.0689731	0.049217	0.00711035	0.0138688	0.00577949	0.0336561	0.0593476	0.0239288	0.0750204	0.00603557	0.00100344	0.0546	0.0819898	0.0245014	0.165763	0.121863	0.0879112	0.0956117	0.0154757	0.0777707	0.126542	0.0695077	0.00573324
GO0019318	0.0655382	0.5047	0.0410922	0.215409	0.0247033	0.0825181	0.0510692	0.0750615	0.0892269	0.233192	0.0341142	0.239258	0.0956223	0.107102	0.0539357	0.0955384	0.0803675	0.0129738	0.0246815	0.0109466	0.0565204	0.0910055	0.0410147	0.114948	0.0109603	0.00215346	0.0868373	0.125879	0.0376187	0.250764	0.182023	0.124578	0.160641	0.0272502	0.142353	0.172436	0.092457	0.0132157
GO0051716	0.0394008	0.165101	0.131528	0.0368231	0.23341	0.0474872	0.0481226	0.110516	0.0494134	0.0302259	0.364784	0.130114	0.0400832	0.0692927	0.115418	0.143491	0.00161604	0.0723951	0.0573648	0.154704	0.146444	0.0278566	0.0555577	0.018548	0.0856772	0.0409204	0.0155783	0.0592168	0.0810505	0.15741	0.136001	0.195903	0.0322455	0.16644	0.136402	0.222685	0.0795499	0.0706749
GO0007243	0.00544681	0.240975	0.19163	0.0146299	0.0901938	0.115097	0.0910846	0.102686	0.0991916	0.0597068	0.507657	0.0856886	0.0486413	0.122899	0.232723	0.188468	0.00403071	0.0651236	0.017016	0.0280554	0.00590624	0.0220097	0.0312793	0.0305722	0.0166689	0.0523892	0.404939	0.102479	0.121195	0.250745	0.317549	0.0486518	0.0493757	0.00900009	0.0483912	0.163176	0.0755409	0.00860934
GO0009966	0.00442685	0.0622963	0.166349	0.0705167	0.145762	0.0469831	0.049429	0.0327365	0.0546234	0.0241055	0.504442	0.00677858	0.0109562	0.1709	0.22468	0.0427173	0.0221851	0.068403	0.0259435	0.167489	0.00621424	0.0251304	0.0620609	0.111491	0.0730286	0.0698323	0.192174	0.314718	0.185572	0.224898	0.36627	0.0308466	0.0755532	0.376445	0.0921718	0.408503	0.266235	0.0842852
GO0009987	0.009061	0.0197921	0.000295395	0.0252373	0.077332	0.12966	0.0210465	0.00432135	0.0269932	0.0279422	0.053843	0.0191141	0.0501166	0.000429987	0.00315156	0.00191184	0.138971	0.00690751	0.186084	0.305728	0.0538576	0.00988085	0.0607356	0.107078	0.013326	0.0926563	0.0353208	0.0698249	0.127885	0.0382003	0.134523	0.202373	0.205132	0.361645	0.332317	0.492879	0.34089	0.716291
GO0051129	0.121522	0.133229	0.126116	0.0467683	0.132485	0.0810657	0.0104609	0.0402475	0.0337097	0.092669	0.0170804	0.0727343	0.0666509	0.0829184	0.0277464	0.109643	0.0798342	0.056897	0.0414051	0.193446	0.181235	0.032972	0.096955	0.0196328	0.0714427	0.149426	0.10911	0.209677	0.121362	0.243397	0.165876	0.365321	0.06887	0.0436276	0.136515	0.0495655	0.393559	0.537572
GO0051261	0.0377356	0.0887071	0.104515	0.0346981	0.099427	0.166051	0.00789457	0.0298686	0.0775787	0.0768961	0.012779	0.152711	0.0614136	0.132862	0.0145013	0.0723101	0.164102	0.117881	0.0914753	0.186338	0.175002	0.070691	0.0333131	0.115213	0.0594428	0.0628555	0.208615	0.201391	0.203323	0.261976	0.160726	0.513785	0.0283785	0.0366047	0.166084	0.0921639	0.521937	0.603459
GO0016043	0.00504489	0.0254594	0.0350408	0.0485362	0.0513189	0.0269651	0.0367232	0.0366882	0.018121	0.00902687	0.0316943	0.0747153	0.0259214	0.00745854	0.19199	0.0240678	0.11579	0.00123897	0.290398	0.144337	0.0320081	0.19716	0.260441	0.117809	0.330347	0.400357	0.0794472	0.321865	0.306579	0.057613	0.153762	0.170742	0.0691756	0.0356141	0.164904	0.501274	0.0894665	0.336306
GO0051674	0.081201	0.227158	0.192444	0.111947	0.0246876	0.0337842	0.0493429	0.250339	0.125744	0.0578462	0.0344252	0.0810094	0.0108886	0.216542	0.156115	0.376782	0.0605557	0.0973586	0.156407	0.206241	0.0218055	0.014792	0.0466841	0.0500816	0.4878	0.148062	0.193496	0.00445845	0.15168	0.0665837	0.161445	0.226463	0.0276004	0.263915	0.263818	0.593391	0.0461696	0.209381
GO0006928	0.081201	0.227158	0.192444	0.111947	0.0246876	0.0337842	0.0493429	0.250339	0.125744	0.0578462	0.0344252	0.0810094	0.0108886	0.216542	0.156115	0.376782	0.0605557	0.0973586	0.156407	0.206241	0.0218055	0.014792	0.0466841	0.0500816	0.4878	0.148062	0.193496	0.00445845	0.15168	0.0665837	0.161445	0.226463	0.0276004	0.263915	0.263818	0.593391	0.0461696	0.209381
GO0022610	0.102623	0.0436071	0.0795381	0.114737	0.30793	0.0767726	0.208221	0.0139087	0.0120816	0.00616628	0.00356722	0.0220635	0.0186012	0.487478	0.597234	0.600038	0.297425	0.0888185	0.278231	0.391355	0.208898	0.0634145	0.463339	0.631004	0.88939	0.386198	0.0163472	0.0220482	0.0112351	0.00088167	0.00257068	0.0612846	0.0455273	0.0628123	0.024403	0.555509	0.449563	0.380882
GO0007155	0.102623	0.0436071	0.0795381	0.114737	0.30793	0.0767726	0.208221	0.0139087	0.0120816	0.00616628	0.00356722	0.0220635	0.0186012	0.487478	0.597234	0.600038	0.297425	0.0888185	0.278231	0.391355	0.208898	0.0634145	0.463339	0.631004	0.88939	0.386198	0.0163472	0.0220482	0.0112351	0.00088167	0.00257068	0.0612846	0.0455273	0.0628123	0.024403	0.555509	0.449563	0.380882
GO0016339	0.0108049	0.382373	0.220872	0.362454	0.099427	0.166051	0.168015	0.184639	0.00180718	0.0014022	0.00301229	0.152711	0.275255	0.478355	0.138023	0.714742	0.919128	0.0475006	0.533994	0.337179	0.502766	0.305582	0.704615	0.400631	0.961975	0.639747	0.0383461	0.201391	0.0313149	0.000207201	0.00156878	0.327898	0.00866937	0.0111087	0.0734124	0.0921639	0.521937	0.781184
GO0005976	0.228561	0.336369	0.377187	0.11522	0.286384	0.0650603	0.241848	0.100438	0.247645	0.303143	0.0987642	0.11998	0.204649	0.44623	0.0516498	0.160944	0.131421	0.210517	0.164303	0.154259	0.25204	0.433864	0.274601	0.110384	0.0685821	0.112745	0.0413647	0.170059	0.0702461	0.0128577	0.0619079	0.0551402	0.158027	0.171225	0.0572116	0.0283061	0.0203745	0.0181848
GO0044264	0.284174	0.389163	0.446903	0.15111	0.341756	0.0923951	0.30908	0.133483	0.315481	0.369863	0.13449	0.16372	0.267391	0.50039	0.0676126	0.196815	0.17749	0.268953	0.216235	0.204521	0.320317	0.509939	0.344926	0.072573	0.0944778	0.154926	0.0596498	0.222904	0.0920452	0.0212262	0.088349	0.0736512	0.223761	0.121325	0.0930458	0.0386688	0.0148984	0.0313069
GO0006073	0.277828	0.256611	0.468411	0.130492	0.2744	0.109936	0.401797	0.243924	0.407714	0.402396	0.149033	0.21368	0.362448	0.731747	0.071586	0.222574	0.227276	0.31318	0.26448	0.253379	0.412165	0.576664	0.434565	0.0691881	0.0867064	0.204875	0.0585864	0.270749	0.12212	0.0343601	0.106046	0.225787	0.428249	0.272012	0.257336	0.045258	0.11645	0.0809354
GO0006354	0.30809	0.247829	0.100593	0.299414	0.163583	0.179366	0.180673	0.572512	0.439286	0.275347	0.481859	0.170375	0.408917	0.29834	0.195943	0.225941	0.431416	0.225817	0.462013	0.192689	0.727951	0.265921	0.0504532	0.0610952	0.247578	0.165361	0.206925	0.202348	0.155827	0.0186954	0.0433988	0.682249	0.223116	0.467961	0.033713	0.157003	0.157141	0.179936
GO0007030	0.30809	0.247829	0.312912	0.589623	0.163583	0.179366	0.0451151	0.572512	0.439286	0.0830843	0.0570949	0.170375	0.163505	0.29834	0.478934	0.225941	0.431416	0.499254	0.462013	0.453105	0.442243	0.550354	0.457062	0.0610952	0.247578	0.411839	0.206925	0.202348	0.155827	0.289132	0.1758	0.682249	0.223116	0.203048	0.141088	0.417432	0.0363612	0.179936
GO0033554	0.30809	0.551097	0.312912	0.0941393	0.428343	0.179366	0.180673	0.284518	0.183304	0.275347	0.213	0.170375	0.163505	0.29834	0.478934	0.521858	0.0441933	0.225817	0.198867	0.192689	0.185291	0.0789108	0.195421	0.0610952	0.247578	0.165361	0.206925	0.202348	0.415458	0.0958167	0.1758	0.389123	0.223116	0.203048	0.141088	0.417432	0.0363612	0.0477133
GO0006891	0.0982665	0.551097	0.312912	0.299414	0.428343	0.179366	0.180673	0.284518	0.183304	0.275347	0.213	0.170375	0.163505	0.61283	0.478934	0.521858	0.178064	0.225817	0.198867	0.192689	0.185291	0.265921	0.195421	0.22322	0.247578	0.165361	0.206925	0.202348	0.155827	0.0958167	0.0433988	0.389123	0.0652112	0.203048	0.033713	0.417432	0.00523355	0.0477133
GO0006892	0.35148	0.356406	0.146806	0.600621	0.492375	0.197327	0.427336	0.323364	0.202037	0.569353	0.237629	0.0584138	0.397747	0.423238	0.54986	0.326591	0.0624127	0.0892855	0.073694	0.0702738	0.066256	0.301114	0.216547	0.249895	0.279126	0.0558575	0.0782422	0.224851	0.477539	0.265808	0.193065	0.205654	0.425959	0.225691	0.113127	0.479817	0.275827	0.0450156
GO0046903	0.11045	0.314923	0.39937	0.274937	0.330007	0.215304	0.0951774	0.338592	0.357814	0.363486	0.158059	0.132524	0.246114	0.641184	0.462319	0.415723	0.0627702	0.390205	0.450038	0.130824	0.303662	0.529688	0.103515	0.249351	0.434834	0.317529	0.0731809	0.470624	0.34765	0.345108	0.380954	0.0780397	0.190363	0.125559	0.152068	0.0465538	0.105707	0.128363
GO0040029	0.239426	0.446938	0.246506	0.38327	0.609783	0.308289	0.173715	0.53149	0.177988	0.513389	0.115776	0.455373	0.146553	0.550057	0.182088	0.399722	0.169506	0.410498	0.351636	0.193446	0.181235	0.322119	0.198005	0.581469	0.456688	0.149426	0.217472	0.534307	0.588553	0.243397	0.469332	0.210051	0.06887	0.210866	0.136515	0.591833	0.0116986	0.0409858
GO0006066	0.362822	0.823894	0.315796	0.539749	0.440991	0.168101	0.020497	0.327289	0.139203	0.569915	0.259488	0.178422	0.197532	0.587876	0.0891958	0.522418	0.0886166	0.0396757	0.11195	0.0954193	0.146116	0.311077	0.139271	0.192289	0.136652	0.0411195	0.2322	0.333284	0.254583	0.103984	0.32019	0.710544	0.215465	0.0639256	0.378158	0.544564	0.283794	0.0550833
GO0006006	0.175573	0.818155	0.278029	0.473829	0.133549	0.342636	0.24222	0.43201	0.356041	0.646206	0.235131	0.427131	0.288967	0.253672	0.435358	0.190661	0.234736	0.177828	0.0725657	0.0653804	0.255616	0.379483	0.191433	0.261802	0.085322	0.0388212	0.436015	0.420648	0.291017	0.457161	0.447353	0.464721	0.512708	0.210021	0.350211	0.535513	0.386399	0.166921
GO0007165	0.110089	0.0763838	0.226576	0.567761	0.63023	0.015873	0.0413898	0.0674175	0.106023	0.0148837	0.0997484	0.00568174	0.00565282	0.390855	0.118009	0.576544	0.212208	0.164749	0.0295984	0.323051	0.018529	0.0497078	0.196823	0.242495	0.231111	0.102269	0.0551311	0.0206589	0.238749	0.17679	0.234219	0.00656771	0.297966	0.236601	0.0880767	0.655656	0.252933	0.310477
GO0007154	0.0670747	0.0836001	0.126365	0.394283	0.543923	0.0149474	0.0336683	0.120208	0.0899551	0.0189176	0.0684044	0.00787741	0.0046427	0.51639	0.20417	0.762848	0.288787	0.217889	0.0282483	0.351152	0.0408559	0.0112816	0.174378	0.297979	0.416036	0.133898	0.0131103	0.0332651	0.18617	0.0749368	0.16854	0.00470361	0.299343	0.113525	0.0746016	0.625606	0.510712	0.458502
GO0007179	0.0393174	0.189601	0.446609	0.0364439	0.415185	0.00177555	0.0363067	0.0318316	0.0100398	0.0291876	0.0517146	0.0319936	0.198807	0.25459	0.128952	0.337998	0.222695	0.149839	0.120825	0.246943	0.234652	0.196626	0.117272	0.146952	0.33884	0.201836	0.0486027	0.124451	0.212239	0.3892	0.218962	0.185279	0.136752	0.125185	0.312344	0.784689	0.371782	0.395687
GO0007411	0.12438	0.252935	0.226073	0.114412	0.186923	0.104945	0.106791	0.292019	0.0248025	0.089182	0.0402433	0.276816	0.0837628	0.517504	0.0335057	0.337711	0.184769	0.29039	0.133985	0.336997	0.199946	0.0152678	0.0666053	0.284389	0.218838	0.539472	0.0779933	0.0733442	0.0896191	0.0472321	0.180091	0.0696487	0.405763	0.508111	0.316681	0.710895	0.262615	0.435346
GO0010324	0.118591	0.0947917	0.185716	0.390467	0.327434	0.0688781	0.398985	0.184004	0.410843	0.109517	0.193008	0.0332812	0.0759222	0.200301	0.671329	0.0628294	0.040694	0.311841	0.296511	0.273172	0.245924	0.36677	0.145079	0.223614	0.302945	0.0792678	0.327576	0.230033	0.382525	0.112104	0.289136	0.0388554	0.653595	0.402758	0.492032	0.583782	0.158056	0.374857
GO0006897	0.118591	0.0947917	0.185716	0.390467	0.327434	0.0688781	0.398985	0.184004	0.410843	0.109517	0.193008	0.0332812	0.0759222	0.200301	0.671329	0.0628294	0.040694	0.311841	0.296511	0.273172	0.245924	0.36677	0.145079	0.223614	0.302945	0.0792678	0.327576	0.230033	0.382525	0.112104	0.289136	0.0388554	0.653595	0.402758	0.492032	0.583782	0.158056	0.374857
GO0016044	0.0840575	0.0878047	0.130557	0.557308	0.350691	0.0268622	0.305882	0.266926	0.142078	0.0917785	0.319123	0.0486015	0.0390784	0.110943	0.820103	0.222827	0.0257242	0.379305	0.399011	0.294603	0.199677	0.150839	0.307582	0.229492	0.483206	0.0626409	0.226767	0.34106	0.129957	0.0578841	0.429852	0.0838176	0.383192	0.579478	0.431514	0.826059	0.130191	0.256992
GO0048771	0.0532641	0.0516992	0.152337	0.278087	0.155626	0.128319	0.0823039	0.0634596	0.0865699	0.00750492	0.0301547	0.0667963	0.0956147	0.271501	0.674003	0.356227	0.470847	0.551376	0.555724	0.635838	0.501031	0.0797779	0.333006	0.24163	0.415935	0.628629	0.278673	0.0436467	0.135064	0.0477053	0.357136	0.535754	0.190432	0.465194	0.120102	0.399344	0.618918	0.651142
GO0046849	0.0470531	0.0525435	0.0895585	0.285171	0.124646	0.157078	0.0583229	0.0600524	0.166555	0.00593197	0.0324188	0.136349	0.0727942	0.279034	0.643529	0.195322	0.551279	0.611046	0.516361	0.606577	0.465077	0.0799789	0.286057	0.273831	0.570787	0.613395	0.323188	0.0864083	0.174726	0.0758537	0.319864	0.411065	0.305526	0.531722	0.157136	0.37105	0.5657	0.729578
GO0031214	0.0470531	0.0525435	0.0895585	0.285171	0.124646	0.157078	0.0583229	0.0600524	0.166555	0.00593197	0.0324188	0.136349	0.0727942	0.279034	0.643529	0.195322	0.551279	0.611046	0.516361	0.606577	0.465077	0.0799789	0.286057	0.273831	0.570787	0.613395	0.323188	0.0864083	0.174726	0.0758537	0.319864	0.411065	0.305526	0.531722	0.157136	0.37105	0.5657	0.729578
GO0001503	0.0470531	0.0525435	0.0895585	0.285171	0.124646	0.157078	0.0583229	0.0600524	0.166555	0.00593197	0.0324188	0.136349	0.0727942	0.279034	0.643529	0.195322	0.551279	0.611046	0.516361	0.606577	0.465077	0.0799789	0.286057	0.273831	0.570787	0.613395	0.323188	0.0864083	0.174726	0.0758537	0.319864	0.411065	0.305526	0.531722	0.157136	0.37105	0.5657	0.729578
GO0006836	0.207727	0.148321	0.111371	0.195356	0.24864	0.383148	0.130705	0.304163	0.245916	0.287409	0.090624	0.116256	0.0183814	0.378656	0.0878016	0.395482	0.234894	0.498679	0.279047	0.265835	0.563426	0.150562	0.740435	0.101081	0.548768	0.508985	0.296369	0.163122	0.548464	0.162353	0.373884	0.335446	0.640131	0.608141	0.42854	0.233368	0.525154	0.365361
GO0016042	0.6439	0.34822	0.385362	0.235195	0.0789394	0.111157	0.429362	0.207421	0.3085	0.0575491	0.269859	0.531973	0.0877315	0.208677	0.742275	0.427749	0.557499	0.566601	0.3532	0.335432	0.444161	0.539904	0.343287	0.0268954	0.0797133	0.16002	0.088629	0.243968	0.481093	0.0858153	0.413607	0.103713	0.0716044	0.499595	0.139946	0.485447	0.142086	0.349575
GO0046483	0.285157	0.345022	0.430009	0.399022	0.25878	0.0368088	0.510241	0.506119	0.150718	0.343908	0.208043	0.218896	0.202562	0.0155006	0.86171	0.174654	0.237525	0.358137	0.179956	0.546916	0.524536	0.46019	0.555018	0.229143	0.173531	0.461184	0.195807	0.186747	0.237496	0.338278	0.137337	0.196697	0.0589535	0.0536725	0.232652	0.370028	0.635521	0.341183
GO0006766	0.418956	0.506035	0.597519	0.571274	0.302293	0.176135	0.310275	0.22544	0.182941	0.211481	0.236263	0.286224	0.426173	0.26115	0.718824	0.778737	0.465564	0.141806	0.0477474	0.199435	0.0934127	0.336983	0.510395	0.255281	0.462933	0.431283	0.538783	0.3607	0.282763	0.119588	0.298895	0.127354	0.580742	0.113551	0.112556	0.285724	0.147114	0.308169
GO0006605	0.0522091	0.630264	0.394448	0.750821	0.385286	0.183024	0.187651	0.621741	0.197118	0.258441	0.0897495	0.0727203	0.0907836	0.0721736	0.166131	0.441627	0.3118	0.0796336	0.192612	0.172049	0.0284728	0.297602	0.47981	0.157274	0.552504	0.578709	0.450913	0.204654	0.426413	0.17075	0.46404	0.906239	0.0180394	0.106133	0.309091	0.433321	0.0770375	0.138585
GO0008632	0.132258	0.175849	0.139369	0.530309	0.611589	0.19354	0.293433	0.367301	0.127329	0.236979	0.639022	0.171423	0.240492	0.0527629	0.608021	0.330936	0.0351988	0.137839	0.351074	0.227942	0.208619	0.67613	0.6976	0.5515	0.625475	0.353044	0.0597821	0.605116	0.580931	0.40722	0.63382	0.835579	0.342998	0.364413	0.311522	0.460595	0.135804	0.221809
GO0006725	0.188468	0.27999	0.744071	0.260476	0.69862	0.0533167	0.158466	0.146279	0.164513	0.206899	0.0948012	0.0226666	0.393679	0.195532	0.799344	0.223082	0.334712	0.498157	0.525348	0.818432	0.594828	0.278752	0.51307	0.489559	0.233299	0.636596	0.222634	0.307134	0.553615	0.220029	0.227299	0.715786	0.25153	0.136295	0.681912	0.437293	0.733323	0.335039
GO0008206	0.432912	0.663599	0.437949	0.423789	0.552425	0.28823	0.289819	0.407944	0.0852665	0.398069	0.328225	0.277207	0.268681	0.716123	0.276797	0.310489	0.595655	0.343005	0.311644	0.615282	0.605505	0.387821	0.307553	0.340029	0.367577	0.270995	0.321136	0.315757	0.540173	0.0407301	0.283877	0.514748	0.132885	0.316582	0.276945	0.542058	0.105378	0.328247
GO0007498	0.418956	0.33041	0.270367	0.571274	0.638977	0.0870851	0.0884634	0.22544	0.0912676	0.0465592	0.0569097	0.16087	0.426173	0.613242	0.383087	0.455506	0.465564	0.414432	0.352638	0.668515	0.793465	0.502541	0.34464	0.577132	0.630362	0.753336	0.37127	0.216773	0.446208	0.119588	0.298895	0.399896	0.0624807	0.529337	0.219776	0.620567	0.690522	0.806564
GO0007167	0.00990647	0.0122294	0.0884339	0.0195651	0.472379	0.0127006	0.000893609	0.00256628	0.00560866	0.00179774	0.0862204	0.00519937	0.0792832	0.208487	0.109808	0.164355	0.0627702	0.0610892	0.058003	0.0688809	0.0249696	0.11615	0.0522264	0.376356	0.00334366	0.20148	0.137725	0.0903013	0.564278	0.761218	0.152429	0.147789	0.306853	0.474751	0.111566	0.426361	0.435915	0.224112
GO0007169	0.0388593	0.0591718	0.332461	0.21693	0.507966	0.091504	0.0154483	0.0224495	0.0279707	0.0102354	0.245852	0.0478097	0.178449	0.46188	0.269196	0.248025	0.176718	0.22848	0.14119	0.124137	0.0470942	0.308401	0.181813	0.609616	0.00809431	0.318023	0.290456	0.206081	0.834202	0.820781	0.227124	0.618662	0.580771	0.512399	0.332629	0.636696	0.63319	0.221054
GO0006508	0.369256	0.417431	0.0722942	0.0461425	0.122244	0.181714	0.126034	0.128513	0.169924	0.0768847	0.0818141	0.163647	0.191076	0.154952	0.164586	0.361775	0.174145	0.191117	0.124727	0.0258085	0.0242387	0.213977	0.488301	0.554691	0.036572	0.0675252	0.235936	0.0893571	0.44879	0.0449091	0.323676	0.212758	0.160952	0.252568	0.245761	0.092497	0.352741	0.312492
GO0018193	0.225429	0.210402	0.235611	0.419054	0.182758	0.19385	0.291501	0.10962	0.129226	0.161569	0.286047	0.258881	0.340359	0.223276	0.275914	0.256033	0.119215	0.223182	0.0979288	0.148094	0.209306	0.145065	0.455315	0.315713	0.115577	0.054276	0.178856	0.361751	0.052094	0.275139	0.11501	0.125056	0.0437311	0.0591855	0.0608933	0.255401	0.10004	0.295582
GO0009057	0.0849977	0.21921	0.0345142	0.0152803	0.0723201	0.0181085	0.0800713	0.0650264	0.0452527	0.212286	0.0848498	0.178948	0.0841514	0.0112706	0.0564194	0.0343998	0.453713	0.0897115	0.102828	0.0444674	0.16061	0.276277	0.256066	0.291883	0.117408	0.0654872	0.166311	0.239153	0.408043	0.156074	0.438045	0.0812488	0.477233	0.115508	0.417277	0.417005	0.270272	0.285641
GO0044265	0.246866	0.387631	0.0383784	0.0171986	0.0652442	0.0776275	0.200702	0.1255	0.161966	0.244522	0.0956648	0.331001	0.133562	0.0435082	0.0548251	0.0572249	0.448478	0.0934249	0.0659961	0.0372165	0.0915725	0.333353	0.210002	0.272801	0.11047	0.0729254	0.260568	0.239936	0.386858	0.182414	0.434661	0.0637377	0.653871	0.188386	0.648131	0.469817	0.358771	0.343876
GO0009056	0.46423	0.451579	0.115893	0.034292	0.105169	0.105258	0.482758	0.186751	0.261193	0.299467	0.297932	0.294082	0.0870017	0.0288281	0.147657	0.166658	0.407749	0.443549	0.204765	0.204313	0.471606	0.432374	0.354024	0.198131	0.0253768	0.0740722	0.256095	0.360084	0.617214	0.219875	0.543266	0.149076	0.35837	0.230748	0.52	0.677749	0.173551	0.437893
GO0046365	0.0382254	0.443836	0.165301	0.251197	0.126552	0.140708	0.142937	0.224467	0.24981	0.33125	0.202022	0.343557	0.114795	0.408778	0.185945	0.138397	0.138503	0.130885	0.0460929	0.0174931	0.254563	0.192633	0.0914132	0.222076	0.163132	0.0593618	0.105549	0.181771	0.0539874	0.508851	0.232025	0.0900133	0.35138	0.183081	0.271963	0.485107	0.122346	0.143592
GO0046164	0.0382254	0.443836	0.165301	0.251197	0.126552	0.140708	0.142937	0.224467	0.24981	0.33125	0.202022	0.343557	0.114795	0.408778	0.185945	0.138397	0.138503	0.130885	0.0460929	0.0174931	0.254563	0.192633	0.0914132	0.222076	0.163132	0.0593618	0.105549	0.181771	0.0539874	0.508851	0.232025	0.0900133	0.35138	0.183081	0.271963	0.485107	0.122346	0.143592
GO0019320	0.0382254	0.443836	0.165301	0.251197	0.126552	0.140708	0.142937	0.224467	0.24981	0.33125	0.202022	0.343557	0.114795	0.408778	0.185945	0.138397	0.138503	0.130885	0.0460929	0.0174931	0.254563	0.192633	0.0914132	0.222076	0.163132	0.0593618	0.105549	0.181771	0.0539874	0.508851	0.232025	0.0900133	0.35138	0.183081	0.271963	0.485107	0.122346	0.143592
GO0044275	0.120345	0.483996	0.309849	0.182028	0.138194	0.193075	0.196284	0.356251	0.42175	0.332726	0.111596	0.376798	0.243442	0.360387	0.128649	0.187649	0.189898	0.212471	0.0240977	0.0212936	0.207763	0.206569	0.0864228	0.206628	0.101666	0.0514618	0.0562168	0.0959338	0.06668	0.309481	0.280449	0.0228711	0.372507	0.163376	0.148363	0.434276	0.101371	0.0918512
GO0016052	0.120345	0.483996	0.309849	0.182028	0.138194	0.193075	0.196284	0.356251	0.42175	0.332726	0.111596	0.376798	0.243442	0.360387	0.128649	0.187649	0.189898	0.212471	0.0240977	0.0212936	0.207763	0.206569	0.0864228	0.206628	0.101666	0.0514618	0.0562168	0.0959338	0.06668	0.309481	0.280449	0.0228711	0.372507	0.163376	0.148363	0.434276	0.101371	0.0918512
GO0006007	0.0422064	0.444937	0.188015	0.288185	0.12916	0.182907	0.185411	0.260866	0.314337	0.383221	0.250061	0.42645	0.153364	0.394701	0.316809	0.1305	0.180424	0.161887	0.059473	0.0226253	0.319361	0.227847	0.117874	0.271367	0.196694	0.0804839	0.237567	0.362399	0.116749	0.635191	0.295392	0.182986	0.486042	0.229666	0.270077	0.669942	0.275131	0.234188
GO0016197	0.249685	0.376891	0.255965	0.0364439	0.226056	0.404699	0.102501	0.21959	0.105084	0.089469	0.280879	0.385318	0.370267	0.464248	0.284152	0.337998	0.099964	0.0586115	0.120825	0.114483	0.10705	0.369449	0.251493	0.0571779	0.0713462	0.087945	0.0137738	0.124451	0.396817	0.59615	0.600445	0.185279	0.282561	0.45399	0.15334	0.214329	0.177869	0.213405
GO0043122	0.00660685	0.230144	0.345474	0.124348	0.235384	0.150244	0.0458305	0.40111	0.0913636	0.164399	0.333071	0.450362	0.119865	0.129507	0.127853	0.103768	0.0437186	0.159959	0.114327	0.276398	0.0497204	0.149045	0.0589301	0.0890676	0.0663825	0.123267	0.440596	0.0657714	0.0324129	0.279953	0.230746	0.526749	0.0845484	0.428498	0.356485	0.329327	0.213636	0.0831315
GO0043123	0.0131284	0.305443	0.460045	0.192369	0.321775	0.148353	0.0849406	0.523757	0.156049	0.248004	0.330752	0.45891	0.119006	0.179006	0.184617	0.15071	0.0816029	0.247628	0.187898	0.398635	0.0910225	0.228693	0.105116	0.148873	0.113106	0.204815	0.576657	0.11534	0.0541459	0.297899	0.231331	0.637839	0.0935311	0.564922	0.404458	0.430587	0.281021	0.09516
GO0007249	0.00629488	0.396614	0.237093	0.135042	0.142891	0.234939	0.0599821	0.467179	0.106316	0.23581	0.344235	0.622543	0.187451	0.138933	0.231399	0.145393	0.0569141	0.128792	0.0483679	0.191429	0.036566	0.14029	0.0791968	0.12404	0.253691	0.278874	0.748402	0.0893233	0.0401149	0.269879	0.422259	0.545507	0.124805	0.416245	0.538565	0.289481	0.145829	0.10281
GO0051128	0.252771	0.204441	0.101601	0.045882	0.113906	0.0493116	0.0252202	0.0172604	0.0965989	0.113217	0.0464338	0.0414508	0.195818	0.122545	0.282011	0.0204271	0.341799	0.10365	0.197199	0.277209	0.0996574	0.0551801	0.189134	0.0549647	0.0200543	0.200759	0.437505	0.422487	0.265267	0.481597	0.0855048	0.789264	0.122135	0.129122	0.659446	0.101869	0.626316	0.666995
GO0031111	0.467033	0.181302	0.0618095	0.205182	0.110302	0.298573	0.108823	0.192381	0.110806	0.184595	0.03156	0.101138	0.275883	0.226538	0.136847	0.162284	0.296729	0.143861	0.122688	0.317269	0.306928	0.17667	0.321063	0.141789	0.39108	0.278564	0.336898	0.125382	0.311039	0.173037	0.105172	0.286102	0.323621	0.125925	0.477095	0.312929	0.841201	0.542637
GO0031110	0.385922	0.216049	0.0635421	0.175162	0.123892	0.209648	0.0791949	0.161731	0.0810229	0.153645	0.0287492	0.197395	0.188063	0.275272	0.158066	0.191175	0.415312	0.273389	0.236346	0.227874	0.428627	0.32848	0.446895	0.110521	0.303312	0.391328	0.247412	0.0946915	0.291305	0.0987402	0.0758494	0.493433	0.36827	0.0952086	0.715989	0.293441	0.693652	0.775515
GO0031109	0.385922	0.216049	0.0635421	0.175162	0.123892	0.209648	0.0791949	0.161731	0.0810229	0.153645	0.0287492	0.197395	0.188063	0.275272	0.158066	0.191175	0.415312	0.273389	0.236346	0.227874	0.428627	0.32848	0.446895	0.110521	0.303312	0.391328	0.247412	0.0946915	0.291305	0.0987402	0.0758494	0.493433	0.36827	0.0952086	0.715989	0.293441	0.693652	0.775515
GO0051248	0.156083	0.156779	0.58652	0.141682	0.0742558	0.285306	0.0743919	0.118727	0.20449	0.257622	0.0736555	0.170884	0.153973	0.098808	0.0735237	0.406697	0.281078	0.326837	0.163898	0.559541	0.647287	0.0932792	0.338198	0.143657	0.0388043	0.158474	0.376551	0.361275	0.622889	0.259635	0.184719	0.55633	0.196321	0.173305	0.239965	0.186788	0.477625	0.497713
GO0007229	0.00126095	0.161169	0.31349	0.0866847	0.237225	0.0450415	0.307691	0.260866	0.10202	0.0676226	0.0713504	0.42645	0.264482	0.241516	0.631778	0.0586484	0.180424	0.161887	0.50664	0.20887	0.319361	0.0609224	0.117874	0.0806822	0.323202	0.411733	0.373898	0.228245	0.116749	0.324846	0.295392	0.0148105	0.0514937	0.364161	0.270077	0.359452	0.449656	0.537443
GO0007178	0.0705675	0.131944	0.256758	0.0644041	0.474938	0.0306948	0.0313625	0.0546407	0.0733411	0.104605	0.195399	0.123115	0.329386	0.204805	0.267806	0.203432	0.135228	0.219267	0.28508	0.410642	0.253493	0.179346	0.277014	0.342621	0.261494	0.48334	0.304035	0.293253	0.300675	0.690849	0.514874	0.0718444	0.247765	0.731476	0.474139	0.453633	0.48929	0.741074
GO0043405	0.0444884	0.271307	0.0474993	0.0394115	0.166378	0.239753	0.0482499	0.0636346	0.0940961	0.0274856	0.227497	0.00808075	0.0161017	0.0439692	0.154129	0.219087	0.0866101	0.166239	0.0658745	0.0595213	0.052414	0.0236137	0.186593	0.0507059	0.017234	0.30409	0.317585	0.0696222	0.0420447	0.751557	0.230031	0.00485536	0.45289	0.0703909	0.0158376	0.357582	0.716931	0.320734
GO0045859	0.0313798	0.261437	0.0128454	0.00260464	0.0396368	0.237046	0.0950556	0.141567	0.069695	0.0364315	0.249247	0.0726001	0.125282	0.0172797	0.0418969	0.0897131	0.0151771	0.0908228	0.0467345	0.00137302	0.0115985	0.0288454	0.0096684	0.169025	0.0287343	0.131043	0.443602	0.342627	0.0741844	0.777281	0.439118	0.069397	0.593549	0.345986	0.252773	0.677978	0.741843	0.887826
GO0043549	0.0369988	0.311665	0.0159128	0.00627658	0.0326376	0.233768	0.133854	0.205067	0.07054	0.0627071	0.319123	0.0724003	0.168503	0.0287437	0.0563963	0.116946	0.0257242	0.0950923	0.0724216	0.00157254	0.0203759	0.0327378	0.0104685	0.173348	0.0738006	0.17566	0.599379	0.496375	0.129957	0.859825	0.509508	0.0838176	0.628304	0.420725	0.273979	0.826059	0.801622	0.897501
GO0051338	0.04777	0.363461	0.0214974	0.00882794	0.0438876	0.264517	0.156405	0.238003	0.085251	0.0780167	0.355715	0.0870906	0.193733	0.0414127	0.0742587	0.14761	0.020443	0.11432	0.0877589	0.00223919	0.0260954	0.0420438	0.0138445	0.201257	0.0904055	0.201572	0.636023	0.534914	0.159227	0.876378	0.54657	0.105206	0.656039	0.459235	0.297393	0.854239	0.814918	0.909025
GO0043086	0.120345	0.353108	0.206738	0.0597262	0.0770107	0.408136	0.196284	0.479972	0.303444	0.226105	0.280392	0.0284702	0.155659	0.0766447	0.128649	0.548318	0.0333318	0.212471	0.242628	0.142798	0.128857	0.0718796	0.34098	0.0376054	0.0274627	0.248964	0.501257	0.362549	0.202695	0.55873	0.844206	0.494598	0.748284	0.0969253	0.353327	0.434276	0.440108	0.626315
GO0033673	0.0328918	0.119483	0.167982	0.0297747	0.0145915	0.460395	0.30908	0.550356	0.47117	0.123163	0.243587	0.035709	0.151708	0.0301005	0.148369	0.095801	0.0909085	0.268953	0.216235	0.108241	0.190719	0.0513522	0.111628	0.072573	0.0046445	0.271886	0.688695	0.361699	0.185877	0.671583	0.756955	0.4319	0.694432	0.121325	0.484081	0.188313	0.757146	0.75204
GO0006469	0.0328918	0.119483	0.167982	0.0297747	0.0145915	0.460395	0.30908	0.550356	0.47117	0.123163	0.243587	0.035709	0.151708	0.0301005	0.148369	0.095801	0.0909085	0.268953	0.216235	0.108241	0.190719	0.0513522	0.111628	0.072573	0.0046445	0.271886	0.688695	0.361699	0.185877	0.671583	0.756955	0.4319	0.694432	0.121325	0.484081	0.188313	0.757146	0.75204
GO0051348	0.0582215	0.195347	0.236274	0.0531284	0.031686	0.53608	0.381916	0.63208	0.547046	0.178762	0.314233	0.057268	0.204649	0.0669536	0.226045	0.160944	0.0639001	0.343326	0.282331	0.154259	0.25204	0.0835437	0.158673	0.110384	0.0100871	0.340433	0.75124	0.439198	0.266153	0.72616	0.808396	0.527848	0.743188	0.171225	0.538085	0.269214	0.786029	0.792622
GO0043407	0.0876204	0.124877	0.42165	0.0825138	0.0609481	0.62862	0.220414	0.596848	0.636173	0.0691982	0.269739	0.0253572	0.077906	0.171191	0.429456	0.486502	0.21646	0.499	0.107658	0.238688	0.422734	0.064321	0.242855	0.0445759	0.0553702	0.600494	0.678468	0.455728	0.0560025	0.646455	0.621651	0.314271	0.541891	0.111398	0.1894	0.349776	0.780694	0.461589
GO0048522	0.0244126	0.06221	0.27235	0.132546	0.0813778	0.0387479	0.00705215	0.341626	0.0611208	0.088425	0.049346	0.159564	0.279435	0.156259	0.067852	0.538534	0.0552288	0.0262897	0.114057	0.0839556	0.0173748	0.298194	0.217112	0.327915	0.254384	0.33641	0.359515	0.3138	0.245373	0.2477	0.582867	0.479133	0.116552	0.189	0.144372	0.293393	0.706057	0.680029
GO0048518	0.100477	0.0861519	0.43373	0.139371	0.166577	0.0524489	0.0114237	0.403596	0.210866	0.166854	0.0941394	0.302697	0.293602	0.231606	0.0860869	0.671664	0.0716225	0.0490358	0.109841	0.112642	0.021006	0.342711	0.331543	0.524817	0.282261	0.388837	0.421454	0.447419	0.299794	0.38644	0.674878	0.353581	0.150036	0.239581	0.2336	0.469049	0.779595	0.704568
GO0008283	0.0336072	0.0876182	0.203936	0.555169	0.278095	0.0405044	0.0115877	0.346486	0.116961	0.0681943	0.220779	0.163004	0.0650992	0.26718	0.115448	0.328846	0.0744231	0.283014	0.287471	0.481619	0.12768	0.542888	0.295754	0.300379	0.0626902	0.84479	0.12643	0.242877	0.447124	0.192105	0.614535	0.199338	0.407373	0.452759	0.680949	0.289224	0.674952	0.592414
GO0008284	0.465139	0.0723794	0.638089	0.352538	0.211543	0.173481	0.0295767	0.729936	0.24532	0.198103	0.254946	0.3806	0.272933	0.725684	0.132521	0.695544	0.124466	0.103288	0.392235	0.0924332	0.107609	0.579831	0.373765	0.445283	0.213558	0.502135	0.361215	0.337934	0.232853	0.534405	0.640185	0.0557198	0.307318	0.16169	0.474396	0.304565	0.684743	0.770419
GO0050954	0.300412	0.395126	0.404787	0.0929691	0.232932	0.131647	0.26499	0.0723262	0.638346	0.80011	0.584656	0.225647	0.200603	0.588603	0.0914828	0.771467	0.128337	0.141091	0.18619	0.234291	0.147261	0.0818786	0.243983	0.0343938	0.269195	0.0631779	0.10062	0.0354636	0.202703	0.427784	0.326632	0.0984405	0.0214497	0.447155	0.48548	0.143947	0.406091	0.576173
GO0007605	0.300412	0.395126	0.404787	0.0929691	0.232932	0.131647	0.26499	0.0723262	0.638346	0.80011	0.584656	0.225647	0.200603	0.588603	0.0914828	0.771467	0.128337	0.141091	0.18619	0.234291	0.147261	0.0818786	0.243983	0.0343938	0.269195	0.0631779	0.10062	0.0354636	0.202703	0.427784	0.326632	0.0984405	0.0214497	0.447155	0.48548	0.143947	0.406091	0.576173
GO0002460	0.235219	0.0963333	0.508583	0.616157	0.216709	0.299143	0.11018	0.306265	0.71525	0.417699	0.0904303	0.543351	0.520555	0.278494	0.71859	0.670791	0.0249003	0.106112	0.0358576	0.0135608	0.117197	0.266547	0.480903	0.561539	0.486948	0.260536	0.251361	0.240714	0.452353	0.394602	0.694646	0.160458	0.146275	0.079169	0.0443121	0.728859	0.19472	0.390457
GO0002250	0.235219	0.0963333	0.508583	0.616157	0.216709	0.299143	0.11018	0.306265	0.71525	0.417699	0.0904303	0.543351	0.520555	0.278494	0.71859	0.670791	0.0249003	0.106112	0.0358576	0.0135608	0.117197	0.266547	0.480903	0.561539	0.486948	0.260536	0.251361	0.240714	0.452353	0.394602	0.694646	0.160458	0.146275	0.079169	0.0443121	0.728859	0.19472	0.390457
GO0019724	0.478927	0.167324	0.487778	0.462877	0.320061	0.574499	0.235586	0.434987	0.749656	0.417631	0.297563	0.371787	0.708517	0.417027	0.58377	0.650281	0.0483009	0.178332	0.141835	0.0578138	0.244356	0.399669	0.772022	0.317333	0.544425	0.539524	0.285836	0.0645826	0.480502	0.691501	0.734771	0.264396	0.1096	0.147313	0.102218	0.483769	0.178186	0.293166
GO0002252	0.207546	0.305443	0.32935	0.299435	0.454646	0.357261	0.0849406	0.389705	0.848252	0.366966	0.330752	0.5935	0.697726	0.432615	0.69582	0.655767	0.0187922	0.0437547	0.110144	0.024995	0.0910225	0.474931	0.180658	0.623842	0.687748	0.313553	0.442204	0.428291	0.426245	0.804903	0.477328	0.0399265	0.164407	0.196814	0.273851	0.300345	0.598325	0.396861
GO0002443	0.385892	0.244669	0.396009	0.233508	0.322946	0.373854	0.139438	0.48608	0.807272	0.465117	0.31839	0.64927	0.629578	0.509407	0.572598	0.651799	0.0114481	0.0600423	0.0898744	0.0379196	0.253493	0.298395	0.277014	0.64234	0.552756	0.48334	0.449135	0.176239	0.300675	0.690849	0.664208	0.0718444	0.141834	0.294901	0.189783	0.453633	0.310937	0.429828
GO0002449	0.43708	0.234833	0.446903	0.419339	0.341756	0.460395	0.182233	0.550356	0.877746	0.530628	0.243587	0.59735	0.728666	0.50039	0.596482	0.670029	0.0151064	0.152268	0.115965	0.0494983	0.190719	0.35047	0.503564	0.57331	0.628962	0.583308	0.533218	0.222904	0.480922	0.671583	0.756955	0.155009	0.120514	0.224252	0.183636	0.484587	0.207376	0.423463
GO0045860	0.289636	0.623241	0.141817	0.0412086	0.405336	0.277275	0.197403	0.154694	0.136198	0.207771	0.397482	0.340095	0.150587	0.149952	0.2272	0.545798	0.124722	0.245378	0.25194	0.060367	0.051976	0.47298	0.16456	0.543018	0.309615	0.320459	0.482534	0.262835	0.371123	0.717752	0.361426	0.0262019	0.511655	0.576392	0.0264138	0.698622	0.43176	0.688188
GO0051347	0.261935	0.617423	0.127142	0.0643426	0.38791	0.231774	0.236037	0.20383	0.110419	0.262459	0.449652	0.286342	0.182175	0.160646	0.314872	0.537589	0.155455	0.210505	0.297518	0.0482786	0.070715	0.428221	0.202523	0.488246	0.470552	0.36192	0.635826	0.40882	0.458678	0.813767	0.405739	0.0253015	0.521465	0.621415	0.0514054	0.838866	0.513951	0.684889
GO0033674	0.261935	0.617423	0.127142	0.0643426	0.38791	0.231774	0.236037	0.20383	0.110419	0.262459	0.449652	0.286342	0.182175	0.160646	0.314872	0.537589	0.155455	0.210505	0.297518	0.0482786	0.070715	0.428221	0.202523	0.488246	0.470552	0.36192	0.635826	0.40882	0.458678	0.813767	0.405739	0.0253015	0.521465	0.621415	0.0514054	0.838866	0.513951	0.684889
GO0043406	0.304397	0.751723	0.0986241	0.288185	0.688904	0.30439	0.185411	0.0745528	0.10202	0.244418	0.543983	0.165961	0.153364	0.241516	0.316809	0.391367	0.301104	0.27683	0.353635	0.20887	0.10455	0.227847	0.497278	0.414495	0.196694	0.411733	0.373898	0.127389	0.355899	0.878586	0.295392	0.0148105	0.6463	0.364161	0.0770896	0.669942	0.812103	0.537443
GO0000187	0.511348	0.876426	0.214728	0.331699	0.726528	0.547711	0.386532	0.174833	0.245916	0.443547	0.774811	0.359702	0.341616	0.378656	0.492266	0.568051	0.379772	0.337206	0.43292	0.265835	0.137393	0.42356	0.424245	0.492514	0.237938	0.508985	0.617435	0.286519	0.548464	0.946199	0.538064	0.0133702	0.640131	0.44337	0.14589	0.709657	0.879973	0.537427
GO0031325	0.138864	0.403174	0.300548	0.241907	0.388656	0.154795	0.0683223	0.406346	0.217007	0.194974	0.053459	0.155904	0.573446	0.477021	0.619415	0.833685	0.480809	0.0280863	0.155186	0.131927	0.338021	0.500735	0.229195	0.578871	0.527627	0.219781	0.290144	0.383169	0.273159	0.26321	0.279669	0.470531	0.483705	0.451964	0.0740536	0.603772	0.879895	0.884362
GO0045941	0.19791	0.268974	0.337665	0.348875	0.245974	0.311422	0.11221	0.497772	0.268587	0.312401	0.0969724	0.263293	0.645509	0.349275	0.508247	0.848812	0.518319	0.0307931	0.0943694	0.111404	0.219878	0.408111	0.26719	0.556841	0.463283	0.184061	0.393837	0.368886	0.20607	0.427549	0.430357	0.442232	0.481081	0.304855	0.137613	0.485002	0.917254	0.958219
GO0045935	0.168047	0.270575	0.360899	0.30275	0.289682	0.243545	0.111519	0.439994	0.207752	0.264773	0.136618	0.316691	0.691811	0.289853	0.490071	0.837353	0.645906	0.022333	0.131216	0.150982	0.337109	0.491949	0.327552	0.625094	0.469601	0.229207	0.462229	0.43567	0.244854	0.458318	0.417872	0.481216	0.495289	0.303489	0.137603	0.455404	0.950423	0.970831
GO0043170	0.0106632	0.0322504	0.00409559	0.00231666	0.0134507	0.229866	0.0121572	0.00794769	0.0290672	0.143227	0.266468	0.360122	0.365629	3.44e-07	0.0013771	9.71e-07	0.0105101	0.0012253	0.0932993	0.00977034	0.0161756	0.0664834	0.0275781	0.0212091	1.42e-05	0.0672117	0.412912	0.358642	0.67544	0.206748	0.20534	0.749724	0.296902	0.358139	0.269965	0.297433	0.539675	0.311355
GO0008152	0.0281604	0.0498675	0.0235789	0.00211116	0.0119023	0.24728	0.0159583	0.011487	0.111842	0.495644	0.511805	0.542765	0.625729	6.7e-05	0.00895409	1.87e-05	0.00415012	0.00322431	0.0400351	0.00615979	0.0205377	0.154841	0.0191488	0.0663676	4.27e-06	0.00622704	0.621459	0.572973	0.531803	0.438815	0.232006	0.597948	0.184565	0.336566	0.382344	0.0706553	0.631048	0.164303
GO0051301	0.0139354	0.231609	0.0686917	0.30081	0.0923757	0.28173	0.28757	0.49182	0.0819543	0.162383	0.107577	0.2425	0.61464	0.0820394	0.0349513	0.112083	0.152023	0.0956615	0.223275	0.200869	0.17538	0.193413	0.0729584	0.0381832	0.100235	0.453348	0.253854	0.642108	0.634179	0.433769	0.341429	0.627759	0.336056	0.390952	0.859045	0.300255	0.16422	0.394768
GO0044237	0.0536884	0.168409	0.0328029	0.0265589	0.102822	0.43505	0.0365085	0.0359962	0.0912021	0.548956	0.376475	0.438362	0.687209	0.00012121	0.0105286	0.000124053	0.0442281	0.0115482	0.13891	0.0565248	0.0602587	0.18043	0.0533813	0.132654	2.24e-05	0.0665732	0.770954	0.72518	0.619673	0.608215	0.336706	0.757791	0.47304	0.52343	0.554492	0.250976	0.715455	0.520295
GO0044238	0.079857	0.117864	0.0510954	0.0111417	0.0361289	0.55425	0.046801	0.0364657	0.0723147	0.428768	0.66878	0.671113	0.798719	0.000119783	0.0195036	0.000536901	0.0559689	0.019614	0.257968	0.0810528	0.0949871	0.26966	0.131465	0.125493	0.000239542	0.124367	0.793947	0.749501	0.758087	0.451021	0.31178	0.814215	0.420828	0.600676	0.552393	0.391252	0.806134	0.505362
GO0043283	0.0158188	0.0489323	0.0183902	0.0323784	0.105771	0.384714	0.126209	0.0296248	0.124888	0.401919	0.594053	0.405661	0.456002	3.81e-05	0.00643275	4.81e-05	0.155661	0.036691	0.533033	0.170121	0.222669	0.153366	0.101335	0.115746	0.00728838	0.435393	0.565846	0.597618	0.816753	0.506554	0.385159	0.854403	0.820989	0.662064	0.78236	0.729835	0.925622	0.796242
GO0006512	0.303937	0.293572	0.0196148	0.00805364	0.0693161	0.10646	0.30154	0.264487	0.316595	0.553948	0.355498	0.575597	0.529128	0.0135775	0.0462144	0.0233145	0.102584	0.359419	0.0988572	0.0593381	0.267214	0.192321	0.208061	0.345568	0.223288	0.335691	0.724222	0.700616	0.81727	0.47367	0.471497	0.729433	0.416703	0.191644	0.707429	0.3721	0.934774	0.453115
GO0007242	0.233424	0.268292	0.243193	0.279882	0.209517	0.179808	0.446722	0.241811	0.217469	0.196025	0.82228	0.220231	0.0322018	0.245518	0.524742	0.71113	0.21858	0.239762	0.0858031	0.258046	0.139752	0.0574793	0.257417	0.338085	0.332104	0.170514	0.461861	0.513609	0.434733	0.372263	0.700941	0.377033	0.432193	0.147351	0.160672	0.929596	0.281006	0.318992
GO0009968	0.08559	0.395646	0.156802	0.136479	0.263395	0.34974	0.47875	0.0141806	0.250604	0.271419	0.881828	0.0762177	0.120512	0.09174	0.249099	0.332809	0.236192	0.258873	0.194392	0.393161	0.164364	0.0236137	0.529108	0.490278	0.314358	0.202196	0.213059	0.780702	0.726996	0.751557	0.708276	0.193657	0.45289	0.554142	0.442426	0.614368	0.565013	0.44844
GO0012502	0.180926	0.238823	0.325973	0.348664	0.163704	0.0763786	0.211356	0.443693	0.222146	0.32767	0.43358	0.227934	0.329878	0.0436	0.234577	0.620416	0.0118132	0.268791	0.0581285	0.148518	0.0396974	0.122099	0.423347	0.565213	0.288144	0.153256	0.196344	0.820161	0.713751	0.503385	0.710253	0.69752	0.0865414	0.241355	0.352511	0.485427	0.375711	0.253059
GO0006917	0.180926	0.238823	0.325973	0.348664	0.163704	0.0763786	0.211356	0.443693	0.222146	0.32767	0.43358	0.227934	0.329878	0.0436	0.234577	0.620416	0.0118132	0.268791	0.0581285	0.148518	0.0396974	0.122099	0.423347	0.565213	0.288144	0.153256	0.196344	0.820161	0.713751	0.503385	0.710253	0.69752	0.0865414	0.241355	0.352511	0.485427	0.375711	0.253059
GO0043068	0.191197	0.188014	0.400542	0.275727	0.231737	0.195133	0.25727	0.492772	0.270347	0.376065	0.502052	0.266112	0.292054	0.0435082	0.209544	0.656536	0.00865874	0.172475	0.0936372	0.198667	0.0291185	0.118342	0.551844	0.557593	0.461105	0.370802	0.324809	0.836719	0.537808	0.593553	0.875526	0.778984	0.221003	0.243052	0.409968	0.469817	0.277887	0.41876
GO0043065	0.191197	0.188014	0.400542	0.275727	0.231737	0.195133	0.25727	0.492772	0.270347	0.376065	0.502052	0.266112	0.292054	0.0435082	0.209544	0.656536	0.00865874	0.172475	0.0936372	0.198667	0.0291185	0.118342	0.551844	0.557593	0.461105	0.370802	0.324809	0.836719	0.537808	0.593553	0.875526	0.778984	0.221003	0.243052	0.409968	0.469817	0.277887	0.41876
GO0006915	0.291303	0.527488	0.243961	0.2019	0.154658	0.187077	0.230283	0.29523	0.420141	0.313242	0.425713	0.256688	0.313681	0.124848	0.299306	0.711926	0.00719394	0.0293604	0.00823007	0.0187959	0.006244	0.180389	0.116793	0.518482	0.238822	0.127165	0.728864	0.861757	0.948527	0.708844	0.931831	0.633118	0.37326	0.295185	0.445036	0.593878	0.0913962	0.362699
GO0012501	0.277671	0.574726	0.26936	0.224248	0.180216	0.201263	0.246151	0.320776	0.439611	0.296966	0.447887	0.27252	0.330146	0.155933	0.295064	0.665456	0.00844064	0.0261542	0.00975571	0.0163359	0.00738648	0.199554	0.128305	0.541352	0.223327	0.137708	0.745656	0.872163	0.945127	0.716144	0.937007	0.665738	0.378001	0.357213	0.492039	0.584067	0.107474	0.41097
GO0016265	0.344248	0.568636	0.256907	0.245755	0.226123	0.226584	0.273929	0.383418	0.470978	0.355702	0.444255	0.338735	0.397526	0.200103	0.278682	0.735159	0.00837845	0.0282003	0.010177	0.0166145	0.010225	0.212722	0.15211	0.584799	0.198891	0.155494	0.736594	0.863558	0.944397	0.780287	0.94222	0.705551	0.351671	0.352021	0.479182	0.498624	0.0978927	0.414955
GO0008219	0.344248	0.568636	0.256907	0.245755	0.226123	0.226584	0.273929	0.383418	0.470978	0.355702	0.444255	0.338735	0.397526	0.200103	0.278682	0.735159	0.00837845	0.0282003	0.010177	0.0166145	0.010225	0.212722	0.15211	0.584799	0.198891	0.155494	0.736594	0.863558	0.944397	0.780287	0.94222	0.705551	0.351671	0.352021	0.479182	0.498624	0.0978927	0.414955
GO0043067	0.226168	0.402237	0.449356	0.267643	0.280752	0.248287	0.303011	0.275943	0.275962	0.418342	0.298279	0.189857	0.413347	0.0429362	0.242158	0.682479	0.0268006	0.050465	0.0519	0.141122	0.0280737	0.147021	0.419053	0.731885	0.494061	0.279486	0.716404	0.847125	0.925302	0.555529	0.922352	0.907422	0.377276	0.588155	0.485347	0.427448	0.223737	0.601531
GO0042981	0.244827	0.421161	0.473763	0.288251	0.299281	0.271227	0.328251	0.297208	0.300036	0.443426	0.32228	0.209785	0.44216	0.0470956	0.25851	0.700457	0.0313211	0.0575633	0.0594199	0.157065	0.0327231	0.161978	0.446685	0.754303	0.520487	0.304345	0.739922	0.86358	0.933171	0.588378	0.932819	0.916898	0.411512	0.562465	0.467127	0.449256	0.213311	0.582826
GO0007050	0.0229536	0.266038	0.101994	0.0876871	0.40199	0.295307	0.115907	0.461181	0.0655932	0.310808	0.273691	0.171182	0.156141	0.0793035	0.0837667	0.125469	0.0601407	0.119698	0.147614	0.136465	0.123628	0.108899	0.04024	0.299943	0.0871639	0.254728	0.376608	0.624766	0.640538	0.348963	0.284897	0.58242	0.309004	0.155373	0.449444	0.512726	0.778491	0.716711
GO0048523	0.0988735	0.117741	0.190395	0.241953	0.332873	0.030167	0.22613	0.0872403	0.0869328	0.117419	0.103263	0.100388	0.0952237	0.00886219	0.133417	0.0463856	0.202094	0.115242	0.162441	0.249313	0.135515	0.0771433	0.186681	0.387945	0.338894	0.436382	0.438055	0.502503	0.945635	0.457859	0.571517	0.554758	0.397709	0.62661	0.515843	0.437051	0.756735	0.561055
GO0048519	0.109532	0.132866	0.206048	0.25461	0.39048	0.0255972	0.25865	0.0932596	0.0755686	0.143202	0.113597	0.100933	0.111642	0.0173248	0.158854	0.0641345	0.203586	0.0927683	0.170905	0.197785	0.13974	0.0954237	0.168765	0.445167	0.332368	0.352772	0.487969	0.587326	0.956308	0.482001	0.565386	0.558793	0.396119	0.668442	0.470396	0.33905	0.786107	0.536321
GO0007264	0.278182	0.125792	0.299014	0.112449	0.0252398	0.180182	0.35107	0.235197	0.367649	0.117891	0.419995	0.287749	0.0865269	0.464335	0.307414	0.0217513	0.398713	0.245657	0.276513	0.300501	0.0926161	0.00954345	0.206516	0.184852	0.237796	0.161326	0.649536	0.62254	0.367129	0.225048	0.320742	0.383665	0.126847	0.360602	0.76861	0.375643	0.722155	0.689806
GO0031589	0.0758662	0.175849	0.324837	0.119987	0.611589	0.120016	0.293433	0.100506	0.3017	0.236979	0.0660127	0.492288	0.589309	0.181997	0.482116	0.0744447	0.0351988	0.319587	0.351074	0.449662	0.208619	0.0790073	0.459106	0.5515	0.382343	0.159527	0.619925	0.605116	0.697718	0.40722	0.390292	0.638238	0.342998	0.720021	0.568633	0.144576	0.655135	0.705072
GO0007160	0.0517711	0.204441	0.375677	0.148537	0.660123	0.153277	0.350499	0.126059	0.250271	0.282384	0.0863417	0.434513	0.533584	0.209423	0.53008	0.0903127	0.0481216	0.375381	0.411007	0.514119	0.255927	0.100825	0.523497	0.490032	0.440345	0.200759	0.561973	0.546868	0.630983	0.481597	0.334253	0.687512	0.299411	0.773947	0.527535	0.17327	0.626316	0.779602
GO0009892	0.210838	0.210796	0.187168	0.21917	0.514581	0.0851044	0.279099	0.200415	0.200462	0.415406	0.324315	0.430111	0.436006	0.0454599	0.0144844	0.0344752	0.489559	0.526601	0.401863	0.477542	0.211132	0.30517	0.557982	0.448665	0.486206	0.572115	0.867296	0.547065	0.631656	0.754555	0.59296	0.558835	0.434128	0.491418	0.659383	0.581951	0.848398	0.753667
GO0043285	0.273888	0.268093	0.0669535	0.0325832	0.19664	0.0442063	0.175902	0.104911	0.0727344	0.338408	0.200532	0.237498	0.204917	0.0108504	0.174859	0.0949992	0.704026	0.196514	0.460958	0.226073	0.313786	0.438747	0.590455	0.445808	0.283967	0.272262	0.431798	0.555612	0.771808	0.162077	0.622619	0.314287	0.699453	0.273378	0.624788	0.500377	0.612781	0.549476
GO0030163	0.322306	0.453741	0.0636894	0.0300933	0.240293	0.0739708	0.113002	0.127891	0.0531439	0.285029	0.105628	0.318784	0.216566	0.0227137	0.168838	0.143909	0.694475	0.253614	0.372771	0.200814	0.175616	0.497106	0.614117	0.572526	0.260816	0.374448	0.583523	0.388941	0.772398	0.0732194	0.428704	0.353772	0.534715	0.238434	0.825544	0.539034	0.592333	0.692042
GO0006511	0.50799	0.463818	0.0262809	0.0358814	0.22338	0.159084	0.230521	0.247672	0.170301	0.30254	0.190672	0.357259	0.243523	0.0365589	0.124329	0.136186	0.761738	0.228477	0.386769	0.198368	0.0773768	0.554036	0.566215	0.584716	0.298166	0.334979	0.704435	0.498347	0.655268	0.174774	0.575797	0.288264	0.767511	0.231312	0.925927	0.367924	0.749072	0.79079
GO0051603	0.50799	0.463818	0.0262809	0.0358814	0.22338	0.159084	0.230521	0.247672	0.170301	0.30254	0.190672	0.357259	0.243523	0.0365589	0.124329	0.136186	0.761738	0.228477	0.386769	0.198368	0.0773768	0.554036	0.566215	0.584716	0.298166	0.334979	0.704435	0.498347	0.655268	0.174774	0.575797	0.288264	0.767511	0.231312	0.925927	0.367924	0.749072	0.79079
GO0043632	0.50799	0.463818	0.0262809	0.0358814	0.22338	0.159084	0.230521	0.247672	0.170301	0.30254	0.190672	0.357259	0.243523	0.0365589	0.124329	0.136186	0.761738	0.228477	0.386769	0.198368	0.0773768	0.554036	0.566215	0.584716	0.298166	0.334979	0.704435	0.498347	0.655268	0.174774	0.575797	0.288264	0.767511	0.231312	0.925927	0.367924	0.749072	0.79079
GO0019941	0.50799	0.463818	0.0262809	0.0358814	0.22338	0.159084	0.230521	0.247672	0.170301	0.30254	0.190672	0.357259	0.243523	0.0365589	0.124329	0.136186	0.761738	0.228477	0.386769	0.198368	0.0773768	0.554036	0.566215	0.584716	0.298166	0.334979	0.704435	0.498347	0.655268	0.174774	0.575797	0.288264	0.767511	0.231312	0.925927	0.367924	0.749072	0.79079
GO0044257	0.56104	0.531592	0.037068	0.0493057	0.273425	0.190424	0.268639	0.292607	0.20306	0.350557	0.226974	0.401315	0.28161	0.0564275	0.162914	0.178813	0.717726	0.268853	0.433363	0.234398	0.0973644	0.603585	0.611413	0.630834	0.344417	0.37798	0.743032	0.545515	0.706988	0.203194	0.619508	0.341588	0.793735	0.270713	0.935998	0.426587	0.767724	0.813978
GO0006732	0.0234307	0.236091	0.183926	0.507079	0.600411	0.0835308	0.56636	0.266778	0.476127	0.62658	0.0996762	0.165575	0.387917	0.132506	0.642879	0.176463	0.554936	0.259649	0.179924	0.234175	0.210444	0.842835	0.528085	0.437042	0.330543	0.301965	0.575279	0.266382	0.459304	0.422624	0.544899	0.204928	0.501456	0.268764	0.581584	0.270238	0.641544	0.646712
GO0051186	0.059756	0.2515	0.205073	0.572749	0.577197	0.0363219	0.684108	0.425816	0.347738	0.655303	0.17372	0.108776	0.258707	0.0806595	0.650963	0.181659	0.40835	0.365288	0.256909	0.391243	0.533712	0.836802	0.403949	0.530992	0.287255	0.345738	0.36965	0.436118	0.442521	0.540883	0.397179	0.143646	0.368624	0.352699	0.437199	0.277445	0.592156	0.544231
GO0065002	0.347885	0.445983	0.521074	0.655936	0.402894	0.237624	0.551211	0.304163	0.393325	0.16267	0.467884	0.359702	0.204729	0.0106665	0.324858	0.238516	0.234894	0.498679	0.43292	0.148358	0.250118	0.42356	0.424245	0.654699	0.38425	0.508985	0.170285	0.606444	0.230652	0.162353	0.123788	0.335446	0.306633	0.755887	0.769152	0.552036	0.725337	0.842035
GO0006366	0.290834	0.0644641	0.0322626	0.169103	0.287463	0.381897	0.15458	0.0540586	0.240286	0.635758	0.721642	0.492025	0.905053	0.0861846	0.177811	0.0581379	0.417999	0.156696	0.235659	0.133554	0.296679	0.517209	0.0204722	0.286274	0.523346	0.767443	0.433478	0.492156	0.185477	0.792627	0.304662	0.380829	0.91489	0.89307	0.891014	0.160831	0.999647	0.979648
GO0050790	0.225445	0.438749	0.159746	0.15096	0.189808	0.355274	0.308587	0.432814	0.18124	0.0831421	0.70599	0.293019	0.29895	0.0197727	0.342632	0.550522	0.0126195	0.139306	0.107541	0.0350212	0.118935	0.225095	0.159946	0.359698	0.281653	0.311997	0.490549	0.793142	0.340463	0.927199	0.738016	0.512531	0.731612	0.524631	0.405697	0.908	0.630909	0.978298
GO0065009	0.248709	0.44934	0.117909	0.20854	0.236182	0.430861	0.385356	0.543819	0.299501	0.224661	0.777579	0.471105	0.306094	0.02543	0.484709	0.534347	0.0675069	0.191546	0.17394	0.089198	0.21964	0.369627	0.333467	0.477516	0.310588	0.373345	0.641936	0.840627	0.325779	0.989795	0.817516	0.582569	0.894824	0.501249	0.715536	0.881591	0.865036	0.995899
GO0000079	0.248369	0.552208	0.147578	0.367714	0.322946	0.525365	0.529175	0.48608	0.248914	0.317704	0.617093	0.498634	0.867231	0.346404	0.267806	0.104973	0.236918	0.348785	0.28508	0.0379196	0.390295	0.179346	0.0860664	0.64234	0.261494	0.334617	0.601507	0.841616	0.300675	0.816055	0.791927	0.818261	0.697266	0.731476	0.999458	0.965838	0.937138	0.992862
GO0008064	0.326547	0.38629	0.505212	0.082824	0.362885	0.23572	0.0558873	0.072245	0.243612	0.270314	0.170858	0.217849	0.51846	0.669814	0.44645	0.0298455	0.384873	0.190222	0.2751	0.420893	0.0592904	0.254531	0.14544	0.324949	0.0175296	0.352904	0.776769	0.880316	0.68508	0.963178	0.379219	0.892419	0.197485	0.283623	0.495285	0.345347	0.652681	0.765158
GO0032956	0.347885	0.445983	0.521074	0.0990353	0.402894	0.237624	0.0613079	0.0863558	0.245916	0.287409	0.179947	0.218869	0.503683	0.556387	0.492266	0.121054	0.379772	0.200887	0.279047	0.417329	0.0651397	0.270385	0.152483	0.331583	0.0229161	0.346517	0.763422	0.866677	0.706544	0.946199	0.373884	0.953024	0.17644	0.288024	0.606889	0.383893	0.725337	0.706064
GO0030832	0.347885	0.445983	0.521074	0.0990353	0.402894	0.237624	0.0613079	0.0863558	0.245916	0.287409	0.179947	0.218869	0.503683	0.556387	0.492266	0.121054	0.379772	0.200887	0.279047	0.417329	0.0651397	0.270385	0.152483	0.331583	0.0229161	0.346517	0.763422	0.866677	0.706544	0.946199	0.373884	0.953024	0.17644	0.288024	0.606889	0.383893	0.725337	0.706064
GO0032535	0.43708	0.559624	0.608731	0.0729978	0.341756	0.305901	0.0938993	0.133483	0.315481	0.228514	0.243587	0.284044	0.578011	0.668382	0.596482	0.196815	0.456808	0.268953	0.353278	0.496362	0.0993033	0.35047	0.209681	0.263777	0.015289	0.421148	0.688695	0.901313	0.781614	0.960201	0.450539	0.929293	0.223761	0.363392	0.657457	0.323477	0.757146	0.75204
GO0008154	0.550804	0.443836	0.561615	0.0760583	0.358135	0.369481	0.142937	0.224467	0.380774	0.474697	0.202022	0.343557	0.746434	0.829289	0.309175	0.0664397	0.511471	0.22726	0.287388	0.407487	0.0798118	0.452062	0.279001	0.347275	0.0408759	0.47189	0.83808	0.956707	0.75969	0.943266	0.504546	0.826758	0.35138	0.297603	0.574639	0.337694	0.565353	0.688831
GO0009260	0.461567	0.230144	0.232307	0.314093	0.483751	0.24023	0.357617	0.18002	0.0228525	0.507321	0.333071	0.450362	0.5573	0.625257	0.59746	0.292617	0.825766	0.498329	0.415373	0.52613	0.37235	0.827161	0.773189	0.361952	0.685997	0.563926	0.571464	0.303179	0.812271	0.965526	0.342056	0.655489	0.623838	0.559372	0.760793	0.329327	0.801278	0.753658
GO0009152	0.433978	0.15257	0.199642	0.284102	0.565488	0.240738	0.36517	0.154693	0.0424043	0.491998	0.328171	0.467942	0.583651	0.788109	0.531657	0.212928	0.850256	0.498421	0.419985	0.539554	0.379177	0.832918	0.794167	0.355285	0.800752	0.589831	0.582201	0.300082	0.874915	0.955875	0.35035	0.743385	0.703521	0.570835	0.853279	0.270752	0.837613	0.835574
GO0050678	0.0893756	0.222935	0.505212	0.311467	0.538489	0.0549433	0.12525	0.285864	0.0216581	0.0661487	0.303978	0.0486771	0.204354	0.490178	0.276836	0.188404	0.121796	0.330281	0.435825	0.750173	0.575391	0.254531	0.268092	0.186246	0.546647	0.690767	0.161919	0.282194	0.342198	0.307261	0.551252	0.892419	0.691962	0.769797	0.679309	0.823487	0.438385	0.765158
GO0050673	0.106872	0.279846	0.521074	0.331699	0.57163	0.0602455	0.130705	0.304163	0.02548	0.0323506	0.309474	0.0532004	0.204729	0.378656	0.324858	0.238516	0.126984	0.337206	0.43292	0.734693	0.563426	0.270385	0.424245	0.196587	0.548768	0.670701	0.170285	0.286519	0.380472	0.442611	0.538064	0.89563	0.789248	0.755887	0.606889	0.83427	0.525154	0.842035
GO0007517	0.0451887	0.0573123	0.234208	0.613633	0.772763	0.218566	0.112271	0.0276257	0.392019	0.0379807	0.440711	0.186224	0.225031	0.205332	0.504099	0.364005	0.545685	0.407892	0.377249	0.526929	0.745415	0.484476	0.539934	0.312605	0.817949	0.57086	0.413457	0.309009	0.570944	0.595863	0.53431	0.907723	0.776607	0.485336	0.692563	0.664911	0.951619	0.960312
GO0001501	0.0530186	0.083935	0.417787	0.725762	0.4355	0.35574	0.177636	0.0188251	0.377833	0.0362317	0.320936	0.139816	0.269358	0.522766	0.4	0.487138	0.83006	0.803438	0.616583	0.783522	0.807607	0.288431	0.79479	0.73509	0.164958	0.714457	0.510324	0.117856	0.461692	0.295381	0.209978	0.225179	0.59503	0.823921	0.525914	0.319903	0.717831	0.859873
GO0033002	0.183153	0.448327	0.187645	0.175162	0.305335	0.0782924	0.420145	0.161731	0.215028	0.0486902	0.25576	0.0721849	0.387759	0.275272	0.605933	0.412873	0.415312	0.273389	0.453008	0.675405	0.952509	0.32848	0.231619	0.494768	0.303312	0.988167	0.697762	0.459131	0.527254	0.466473	0.411093	0.721339	0.612423	0.691833	0.715989	0.529763	0.920431	0.775515
GO0030198	0.0582215	0.0955262	0.377187	0.507107	0.440194	0.238976	0.241848	0.100438	0.698461	0.0405409	0.466542	0.0235821	0.335362	0.44623	0.68987	0.447612	0.812739	0.210517	0.848485	0.720486	0.911081	0.284945	0.274601	0.782797	0.392674	0.886105	0.609093	0.439198	0.1481	0.26624	0.128011	0.527848	0.743188	0.854839	0.928	0.581551	0.605514	0.897111
GO0050793	0.70281	0.153317	0.721557	0.667361	0.254845	0.282717	0.228744	0.190896	0.444871	0.213422	0.200532	0.515579	0.397753	0.153401	0.793071	0.682206	0.704026	0.678236	0.609653	0.500265	0.313786	0.0477374	0.516129	0.594788	0.422886	0.762865	0.132974	0.555612	0.492291	0.563857	0.857497	0.535933	0.957458	0.559536	0.825722	0.717243	0.77746	0.974925
GO0030155	0.418948	0.345022	0.707096	0.16249	0.537418	0.365267	0.369132	0.141545	0.657973	0.222337	0.462799	0.218896	0.45507	0.318662	0.63973	0.582792	0.237525	0.763042	0.565111	0.799786	0.66359	0.0268717	0.412399	0.491325	0.413845	0.461184	0.720151	0.819183	0.36611	0.754441	0.859025	0.729792	0.608519	0.978423	0.893114	0.240703	0.635521	0.872687
GO0006996	0.0779756	0.201821	0.242263	0.20973	0.217302	0.33002	0.157447	0.326427	0.129997	0.10077	0.142092	0.205567	0.148458	0.0302941	0.391775	0.040921	0.469629	0.0924801	0.828646	0.604057	0.253719	0.463022	0.801986	0.312685	0.744227	0.826085	0.681757	0.8015	0.69081	0.62733	0.562224	0.833685	0.215573	0.198392	0.794592	0.951953	0.605713	0.62728
GO0030036	0.430713	0.211609	0.290302	0.396417	0.292635	0.211054	0.0512764	0.50326	0.295212	0.381791	0.111325	0.023525	0.274387	0.809878	0.780751	0.436999	0.809926	0.260497	0.617709	0.587228	0.174829	0.343912	0.679989	0.56921	0.428665	0.758664	0.729894	0.836538	0.254083	0.572355	0.414568	0.849052	0.11829	0.471491	0.866475	0.588098	0.795983	0.60453
GO0030029	0.499963	0.33687	0.28563	0.383354	0.316199	0.237046	0.0649319	0.562684	0.323917	0.441471	0.138825	0.0310481	0.229514	0.845616	0.796183	0.48319	0.757489	0.302468	0.642889	0.61184	0.201084	0.323893	0.625743	0.525247	0.478772	0.764683	0.75035	0.847601	0.34856	0.553194	0.439118	0.88911	0.108112	0.423865	0.866498	0.518669	0.741843	0.546885
GO0042063	0.100711	0.20824	0.104515	0.362454	0.577069	0.309006	0.168015	0.0081794	0.498073	0.321519	0.104963	0.466794	0.275255	0.132862	0.138023	0.0723101	0.819482	0.591786	0.533994	0.931119	0.321564	0.305582	0.342927	0.754924	0.792506	0.798289	0.726473	0.357447	0.203323	0.435533	0.48008	0.327898	0.314656	0.719277	0.860045	0.863658	0.984166	0.970228
GO0010001	0.158909	0.239545	0.332223	0.719419	0.703405	0.513147	0.311229	0.0489202	0.722218	0.479936	0.193816	0.49375	0.278821	0.310499	0.352051	0.209776	0.865847	0.603902	0.553118	0.881464	0.319875	0.670757	0.546258	0.784128	0.815075	0.85046	0.760697	0.351495	0.273765	0.51337	0.505531	0.243388	0.401638	0.561328	0.860564	0.940968	1	0.974751
GO0043284	0.277828	0.646348	0.65747	0.26523	0.653228	0.398845	0.593176	0.243924	0.407714	0.593767	0.660779	0.378343	0.552807	0.868002	0.177701	0.222574	0.0420308	0.31318	0.442077	0.253379	0.412165	0.385549	0.434565	0.161701	0.352546	0.366763	0.459425	0.639653	0.440948	0.358397	0.390757	0.765527	0.24974	0.451118	0.0501994	0.260491	0.012666	0.0809354
GO0007259	0.303307	0.693386	0.487778	0.153158	0.680587	0.574499	0.74453	0.0582739	0.240577	0.417631	0.905229	0.72348	0.53472	0.611233	0.58377	0.650281	0.230651	0.498797	0.270322	0.424631	0.244356	0.237156	0.137375	0.317333	0.364434	0.0407604	0.45717	0.894746	0.809491	0.511325	0.565805	0.619695	0.221689	0.628753	0.75326	0.160016	0.348444	0.473316
GO0046364	0.0363332	0.356406	0.146806	0.341145	0.238953	0.42513	0.427336	0.323364	0.202037	0.569353	0.237629	0.668557	0.657313	0.423238	0.284916	0.326591	0.195771	0.499161	0.457272	0.447264	0.435069	0.556621	0.451709	0.742501	0.102653	0.180604	0.0782422	0.462843	0.477539	0.265808	0.677138	0.703108	0.694382	0.716635	0.296631	0.479817	0.579896	0.633737
GO0046165	0.0363332	0.356406	0.146806	0.341145	0.238953	0.42513	0.427336	0.323364	0.202037	0.569353	0.237629	0.668557	0.657313	0.423238	0.284916	0.326591	0.195771	0.499161	0.457272	0.447264	0.435069	0.556621	0.451709	0.742501	0.102653	0.180604	0.0782422	0.462843	0.477539	0.265808	0.677138	0.703108	0.694382	0.716635	0.296631	0.479817	0.579896	0.633737
GO0019319	0.0363332	0.356406	0.146806	0.341145	0.238953	0.42513	0.427336	0.323364	0.202037	0.569353	0.237629	0.668557	0.657313	0.423238	0.284916	0.326591	0.195771	0.499161	0.457272	0.447264	0.435069	0.556621	0.451709	0.742501	0.102653	0.180604	0.0782422	0.462843	0.477539	0.265808	0.677138	0.703108	0.694382	0.716635	0.296631	0.479817	0.579896	0.633737
GO0016051	0.136123	0.622812	0.040163	0.314093	0.352223	0.353444	0.616082	0.280269	0.250808	0.750971	0.590014	0.704494	0.790857	0.911811	0.59746	0.184063	0.147643	0.62753	0.781498	0.52613	0.630933	0.481665	0.773189	0.490529	0.43073	0.563926	0.571464	0.557166	0.454288	0.279953	0.599971	0.767848	0.488651	0.791232	0.356485	0.591813	0.213636	0.491911
GO0007033	0.183153	0.689684	0.628784	0.374166	0.543563	0.209648	0.211433	0.3539	0.0212086	0.341379	0.25576	0.400883	0.387759	0.525527	0.605933	0.656545	0.207872	0.11255	0.236346	0.442012	0.428627	0.562253	0.446895	0.494768	0.303312	0.391328	0.247412	0.459131	0.749316	0.0987402	0.411093	0.493433	0.172842	0.460356	0.463839	0.751336	0.920431	0.128503
GO0007040	0.256887	0.7694	0.734956	0.481571	0.642992	0.30423	0.306302	0.460995	0.0375216	0.448127	0.356571	0.529612	0.516661	0.60924	0.698281	0.741677	0.302163	0.171037	0.334829	0.32521	0.556538	0.678502	0.573946	0.618423	0.408227	0.520197	0.347271	0.585468	0.830666	0.165517	0.539591	0.597027	0.111956	0.586616	0.380908	0.832199	0.899815	0.221983
GO0046519	0.385922	0.689684	0.628784	0.610458	0.543563	0.417727	0.655224	0.3539	0.424988	0.341379	0.25576	0.400883	0.188063	0.525527	0.36233	0.843836	0.0200042	0.273389	0.0921367	0.227874	0.217746	0.32848	0.231619	0.269816	0.534125	0.190582	0.467102	0.459131	0.527254	0.466473	0.646673	0.721339	0.612423	0.691833	0.463839	0.751336	1	0.540086
GO0006672	0.385922	0.689684	0.628784	0.610458	0.543563	0.417727	0.655224	0.3539	0.424988	0.341379	0.25576	0.400883	0.188063	0.525527	0.36233	0.843836	0.0200042	0.273389	0.0921367	0.227874	0.217746	0.32848	0.231619	0.269816	0.534125	0.190582	0.467102	0.459131	0.527254	0.466473	0.646673	0.721339	0.612423	0.691833	0.463839	0.751336	1	0.540086
GO0006665	0.576458	0.786645	0.940526	0.852015	0.767126	0.308289	0.80343	0.700392	0.488258	0.513389	0.227909	0.631604	0.437377	0.724847	0.827373	0.978465	0.0313215	0.410498	0.203792	0.337951	0.321503	0.494451	0.517889	0.404897	0.632163	0.149426	0.544947	0.703264	0.588553	0.583371	0.644738	0.712312	0.450396	0.83873	0.435834	0.870873	0.938182	0.20194
GO0051179	0.202853	0.502321	0.686364	0.696807	0.818886	0.104964	0.314708	0.833525	0.66559	0.539232	0.339109	0.20568	0.052403	0.556823	0.745988	0.973188	0.477005	0.5733	0.671364	0.442047	0.515463	0.60482	0.468591	0.414577	0.701951	0.567416	0.262361	0.330739	0.770708	0.420273	0.375067	0.129687	0.224584	0.246891	0.653321	0.342755	0.024586	0.398375
GO0000165	0.244992	0.49658	0.436671	0.390467	0.520088	0.584876	0.590825	0.340209	0.772562	0.229746	0.721874	0.0887274	0.116939	0.378923	0.577124	0.508562	0.298364	0.593549	0.385125	0.359116	0.328184	0.204014	0.561518	0.223614	0.0679147	0.61393	0.515245	0.399805	0.291888	0.896974	0.568415	0.0113549	0.456002	0.00736461	0.0960252	0.485888	0.335716	0.374857
GO0031098	0.374119	0.755288	0.521599	0.353969	0.509449	0.297247	0.565955	0.450986	0.574378	0.427725	0.777157	0.170725	0.373298	0.333886	0.742275	0.570261	0.557499	0.430241	0.743992	0.603554	0.444161	0.277981	0.735314	0.109524	0.238281	0.767264	0.763371	0.848248	0.618653	0.766838	0.182578	0.103713	0.475147	0.0188841	0.2351	0.745406	0.397255	0.632919
GO0007254	0.497127	0.831529	0.646696	0.476329	0.621707	0.431392	0.576198	0.440169	0.584331	0.558349	0.874748	0.170024	0.380855	0.421314	0.825845	0.670791	0.700988	0.428239	0.754318	0.612476	0.449884	0.394509	0.74608	0.181787	0.349342	0.782731	0.772706	0.858028	0.725312	0.795412	0.181488	0.160458	0.657868	0.0383746	0.409898	0.832871	0.494909	0.682155
GO0009888	0.184047	0.527556	0.512149	0.4449	0.490952	0.0212385	0.126787	0.249396	0.101849	0.0677704	0.0475223	0.16596	0.228355	0.825788	0.81346	0.54459	0.578928	0.901429	0.704049	0.783811	0.95643	0.344471	0.621173	0.0894748	0.650959	0.884879	0.291181	0.166912	0.190404	0.404665	0.495116	0.120418	0.275526	0.828421	0.315304	0.86091	0.39429	0.868499
GO0007398	0.412773	0.77381	0.873087	0.385698	0.45275	0.0814201	0.58085	0.740511	0.287487	0.515741	0.397569	0.639497	0.707448	0.959388	0.943363	0.792693	0.464731	0.821162	0.744684	0.724066	0.983306	0.686923	0.639835	0.0398288	0.868425	0.972102	0.478024	0.564952	0.151652	0.764103	0.82867	0.343463	0.666377	0.83278	0.84547	0.973537	0.668205	0.925173
GO0007156	0.193376	0.0909047	0.140945	0.245236	0.0244096	0.730806	0.648458	0.373956	0.0191329	0.0488953	0.0121288	0.23233	0.285763	0.978202	0.388557	0.965507	0.995669	0.547075	0.908405	0.896894	0.752506	0.502867	0.786473	0.257412	0.999943	0.829277	0.00510824	0.00902635	0.00200649	2.76e-05	4.24e-05	0.238389	0.0799747	0.054136	0.145392	0.698025	0.824771	0.839856
GO0016337	0.475198	0.0870012	0.143677	0.30079	0.158568	0.52781	0.536333	0.428081	0.0525335	0.204038	0.0457472	0.39894	0.421344	0.982116	0.536565	0.899343	0.990608	0.666558	0.946665	0.909965	0.852324	0.336426	0.940619	0.715131	0.999321	0.945342	0.0376638	0.0932972	0.0125194	0.0258046	0.0583612	0.297137	0.587574	0.398426	0.437319	0.750098	0.862872	0.896031
GO0043062	0.0283895	0.120072	0.441249	0.513042	0.31503	0.157669	0.334243	0.11176	0.0631767	0.0155931	0.16747	0.0841094	0.594795	0.559451	0.330402	0.942821	0.937008	0.197783	0.925862	0.488586	0.945399	0.409019	0.609978	0.864204	0.678405	0.954356	0.323949	0.525214	0.0735563	0.0405241	0.0295644	0.654952	0.281848	0.0283333	0.762507	0.289481	0.748116	0.959416
GO0007416	0.100711	0.753014	0.572079	0.72277	0.387011	0.309006	0.491814	0.520702	0.0082354	0.0768961	0.041168	0.289892	0.635339	0.478355	0.138023	0.976767	0.971153	0.117881	0.849424	0.51996	0.684064	0.485507	0.844834	0.878231	0.901611	0.906911	0.099067	0.541772	0.0313149	0.00562591	0.0256545	0.513785	0.0283785	4.36e-05	0.315406	0.0921639	0.910168	0.970228
GO0050808	0.385892	0.702602	0.814346	0.793736	0.629046	0.525365	0.802016	0.63699	0.0327333	0.194034	0.31839	0.780129	0.934699	0.798604	0.414814	0.999083	0.978549	0.49857	0.961348	0.563279	0.898794	0.734876	0.910819	0.937078	0.953774	0.973251	0.304035	0.841616	0.300675	0.0732913	0.231768	0.818261	0.247765	0.000432974	0.638413	0.304052	0.937138	0.975581
GO0007409	0.796219	0.433541	0.628697	0.19487	0.538559	0.371372	0.588464	0.540103	0.492794	0.509951	0.503542	0.884511	0.408385	0.708909	0.108766	0.681823	0.769213	0.747528	0.658802	0.812519	0.705886	0.0464766	0.435257	0.645709	0.415935	0.807956	0.375188	0.462462	0.50221	0.27888	0.568275	0.15624	0.78782	0.571964	0.801757	0.798502	0.740968	0.750937
GO0050772	0.947668	0.356406	0.617412	0.1372	0.238953	0.42513	0.684628	0.581474	0.879859	0.312398	0.479588	0.967643	0.178391	0.423238	0.094541	0.326591	0.680643	0.499161	0.457272	0.702283	0.435069	0.0268605	0.451709	0.742501	0.922161	0.660395	0.470094	0.715688	0.729429	0.767956	0.677138	0.446997	0.983016	0.716635	0.965309	0.899656	1	0.360437
GO0031668	0.30809	0.551097	0.604666	0.299414	0.717867	0.433381	0.435349	0.572512	0.439286	0.275347	0.932032	0.708718	0.408917	0.29834	0.478934	0.521858	0.0441933	0.499254	0.462013	0.736914	0.727951	0.265921	0.457062	0.22322	0.527575	0.411839	0.206925	0.466969	0.415458	0.841221	0.715902	0.682249	0.499425	0.748887	0.92673	0.708226	0.437933	0.744852
GO0009991	0.550804	0.59859	0.70098	0.531076	0.507289	0.369481	0.519378	0.768733	0.380774	0.474697	0.920117	0.487719	0.46596	0.144335	0.456242	0.893578	0.0330967	0.643543	0.572349	0.812057	0.797079	0.452062	0.702095	0.12725	0.554641	0.75116	0.307107	0.434614	0.481083	0.508851	0.872418	0.576866	0.50089	0.83134	0.574639	0.762844	0.565353	0.688831
GO0010033	0.678852	0.663222	0.813262	0.662106	0.601684	0.688783	0.539739	0.474918	0.698461	0.303143	0.76344	0.510381	0.49013	0.615479	0.226045	0.864894	0.0268229	0.343326	0.430137	0.720486	0.394284	0.284945	0.579674	0.205909	0.550801	0.495655	0.451021	0.741689	0.725943	0.574557	0.679793	0.682064	0.590826	0.291741	0.70388	0.419944	0.912723	0.320819
GO0007530	0.729683	0.805164	0.735548	0.50205	0.675696	0.528162	0.530726	0.699482	0.535848	0.687016	0.918937	0.727391	0.496018	0.857226	0.884915	0.910189	0.740013	0.612023	0.565137	0.762328	0.898187	0.450743	0.766268	0.607705	0.421609	0.0409204	0.354556	0.346802	0.660077	0.916557	0.967468	0.626949	0.690083	0.776912	0.773859	0.840177	1	0.619635
GO0042110	0.651461	0.266038	0.774566	0.499693	0.40199	0.551945	0.299134	0.942451	0.798405	0.935108	0.394526	0.766066	0.747101	0.784157	0.918326	0.731525	0.11165	0.0317832	0.00811674	0.0760349	0.123628	0.672491	0.342589	0.874728	0.743458	0.254728	0.638266	0.952481	0.508241	0.8382	0.963971	0.207235	0.706796	0.495703	0.449444	0.64475	0.955821	0.954732
GO0030217	0.861392	0.786645	0.978004	0.932543	0.767126	0.801149	0.65618	0.96982	0.807944	0.989195	0.852369	0.631604	0.952635	0.855329	0.967169	0.942307	0.305384	0.130388	0.0414051	0.193446	0.666728	0.908234	0.827456	0.978666	0.984487	0.619091	0.844183	0.925449	0.408468	0.874444	0.987184	0.365321	0.966376	0.704686	0.911791	0.97869	1	0.999742
GO0006816	0.915469	0.951365	0.566985	0.948023	0.888958	0.753751	0.907583	0.887	0.995804	0.585474	0.835788	0.726778	0.589309	0.957888	0.244546	0.999875	0.641633	0.918264	0.244462	0.572716	0.665782	0.67613	0.340094	0.954174	0.826282	0.473256	0.376783	0.253907	0.334117	0.40722	0.972488	0.0294023	0.71344	0.720021	0.311522	0.800182	0.655135	0.45199
GO0007218	0.941362	0.818816	0.718619	0.968055	0.988578	0.622753	0.955553	0.921636	0.915318	0.75087	0.821036	0.5935	0.570111	0.989158	0.804216	0.773069	0.837852	0.95549	0.292335	0.926438	0.917801	0.949003	0.9294	0.953687	0.425472	0.313553	0.576657	0.195311	0.426245	0.804903	0.611338	0.0399265	0.874327	0.969852	0.548942	0.430587	0.873805	0.885283
GO0007049	0.026572	0.0430092	0.355074	0.309272	0.502933	0.364771	0.783486	0.481785	0.269295	0.140875	0.29626	0.564146	0.542687	0.00459375	0.0340345	0.0146306	0.308675	0.109494	0.64138	0.393974	0.420134	0.342404	0.0281297	0.289552	0.185238	0.416486	0.426851	0.625635	0.784066	0.597799	0.784124	0.799043	0.430347	0.75859	0.980347	0.383407	0.848715	0.955278
GO0022402	0.119074	0.154037	0.657737	0.72472	0.820822	0.44877	0.839628	0.584482	0.277675	0.46884	0.452043	0.851281	0.773317	0.0515868	0.121891	0.197668	0.333654	0.203754	0.610134	0.347358	0.34049	0.177956	0.0446447	0.422285	0.201365	0.434063	0.619859	0.878847	0.873922	0.766299	0.847182	0.87893	0.391464	0.881655	0.951727	0.634791	0.696062	0.947512
GO0007005	0.374119	0.63127	0.261455	0.488352	0.509449	0.0586659	0.565955	0.713821	0.3085	0.693388	0.529492	0.271724	0.0877315	0.0216662	0.219304	0.427749	0.0574205	0.430241	0.486769	0.467553	0.708402	0.277981	0.735314	0.688915	0.625671	0.649018	0.511351	0.915857	0.741865	0.508015	0.413607	0.801336	0.338403	0.499595	0.2351	0.842727	0.564999	0.349575
GO0006399	0.525519	0.336369	0.535633	0.507107	0.601684	0.815192	0.692025	0.76953	0.547046	0.753811	0.624015	0.665684	0.335362	0.0230808	0.534224	0.447612	0.131421	0.654134	0.588645	0.572465	0.825983	0.16534	0.158673	0.648181	0.550801	0.340433	0.609093	0.741689	0.919715	0.574557	0.679793	0.527848	0.27541	0.441014	0.369321	0.729082	0.605514	0.792622
GO0008629	0.141952	0.33041	0.147321	0.727643	0.166971	0.307222	0.784764	0.916955	0.646312	0.685124	0.839041	0.613694	0.426173	0.129679	0.227252	0.286289	0.0125496	0.583041	0.210485	0.503497	0.793465	0.667232	0.811388	0.931206	0.462933	0.60039	0.225104	0.822783	0.446208	0.709804	0.88329	0.728397	0.580742	0.529337	0.726822	0.769254	0.690522	0.911421
GO0048145	0.35148	0.131272	0.617412	0.600621	0.238953	0.197327	0.684628	0.80732	0.431752	0.0288341	0.901953	0.668557	0.657313	0.170337	0.284916	0.59756	0.680643	0.499161	0.710934	0.702283	0.691548	0.556621	0.706143	0.495245	0.531022	0.401013	0.721812	0.975927	0.898632	0.767956	0.419076	0.884126	0.195698	0.895111	0.567327	0.731338	0.579896	0.863262
GO0048144	0.35148	0.131272	0.617412	0.600621	0.238953	0.197327	0.684628	0.80732	0.431752	0.0288341	0.901953	0.668557	0.657313	0.170337	0.284916	0.59756	0.680643	0.499161	0.710934	0.702283	0.691548	0.556621	0.706143	0.495245	0.531022	0.401013	0.721812	0.975927	0.898632	0.767956	0.419076	0.884126	0.195698	0.895111	0.567327	0.731338	0.579896	0.863262
GO0006261	0.363441	0.692808	0.826269	0.4629	0.660123	0.805797	0.934731	0.771686	0.719598	0.642925	0.797877	0.92199	0.533584	0.122545	0.10665	0.0903127	0.341799	0.0572791	0.121844	0.111469	0.488293	0.729654	0.523497	0.61342	0.136971	0.0374302	0.561973	0.916083	0.630983	0.724884	0.928977	0.687512	0.419289	0.424791	0.527535	0.385029	0.626316	0.407781
GO0006310	0.418948	0.215264	0.948018	0.795254	0.537418	0.929564	0.773075	0.768777	0.518413	0.751229	0.325286	0.849121	0.729425	0.0433949	0.221895	0.582792	0.141323	0.358137	0.422396	0.27377	0.66359	0.73217	0.889906	0.351474	0.413845	0.603944	0.445559	0.298146	0.92993	0.479235	0.761372	0.834732	0.46041	0.577164	0.796706	0.514518	0.635521	0.487136
GO0006457	0.840754	0.430251	0.613633	0.568847	0.887136	0.599233	0.846127	0.517316	0.32491	0.761487	0.73048	0.816378	0.715012	0.0268714	0.165185	0.34731	0.769885	0.306809	0.297011	0.46	0.332965	0.86977	0.751663	0.389317	0.581435	0.632665	0.940225	0.774491	0.341563	0.874224	0.677703	0.657092	0.408461	0.935254	0.843712	0.546723	0.469135	0.818504
GO0006259	0.318235	0.236413	0.724464	0.589257	0.591282	0.932972	0.850604	0.575614	0.729927	0.554621	0.790558	0.935921	0.641702	0.000646211	0.279239	0.118425	0.355199	0.228294	0.729748	0.190743	0.567883	0.853854	0.743666	0.784351	0.823933	0.372955	0.620365	0.855118	0.977197	0.936828	0.951213	0.90534	0.732879	0.633438	0.69294	0.988635	0.694301	0.62085
GO0006974	0.29488	0.267155	0.384666	0.758242	0.70489	0.807279	0.623006	0.558443	0.637821	0.662852	0.876217	0.933266	0.792389	0.000601873	0.041714	0.0160384	0.382686	0.28133	0.353785	0.321516	0.716744	0.810255	0.902292	0.902055	0.382267	0.310232	0.755179	0.843614	0.880744	0.933362	0.943366	0.699749	0.957836	0.737933	0.880101	0.96198	0.947454	0.940744
GO0006281	0.422244	0.511661	0.526639	0.640884	0.874335	0.871628	0.614143	0.412708	0.627369	0.881606	0.81931	0.982212	0.871588	0.0117418	0.0140011	0.0550402	0.600779	0.258271	0.53822	0.200891	0.782538	0.860592	0.869968	0.928414	0.425778	0.364017	0.799273	0.923436	0.970747	0.940517	0.958858	0.84295	0.861875	0.842854	0.927087	0.983185	0.900398	0.933424
GO0009719	0.469972	0.47644	0.426591	0.74714	0.845721	0.73153	0.791134	0.681241	0.803615	0.754657	0.952683	0.874301	0.847383	0.00304057	0.149988	0.134908	0.398713	0.429268	0.601347	0.494852	0.890613	0.712853	0.889607	0.834779	0.486877	0.512924	0.814558	0.877807	0.887643	0.837033	0.921103	0.818228	0.987784	0.797864	0.953449	0.972671	0.929001	0.889997
GO0051726	0.297854	0.170194	0.579963	0.756075	0.778145	0.594942	0.864298	0.689778	0.556133	0.321345	0.484199	0.861495	0.870969	0.028519	0.296341	0.134806	0.453713	0.562823	0.816547	0.48639	0.503283	0.103205	0.0682517	0.612257	0.426091	0.689046	0.848991	0.902056	0.82965	0.957644	0.954306	0.95029	0.838799	0.929513	0.994909	0.617955	0.99153	0.997915
GO0000074	0.324246	0.185326	0.609582	0.780165	0.798303	0.629298	0.883491	0.717322	0.59097	0.349617	0.518035	0.881236	0.889951	0.0321455	0.318565	0.148131	0.488959	0.595719	0.839408	0.521138	0.538393	0.117535	0.0797384	0.644327	0.458017	0.720945	0.829879	0.916844	0.847032	0.966725	0.962784	0.957512	0.865478	0.941041	0.996658	0.644031	0.990597	0.998653
GO0050794	0.0480625	0.45712	0.421095	0.582	0.607941	0.593203	0.394616	0.478049	0.433109	0.479852	0.791399	0.520909	0.695975	0.0989184	0.135905	0.0142227	0.611766	0.48777	0.901861	0.822318	0.634671	0.372097	0.570838	0.534182	0.208287	0.946644	0.701489	0.835735	0.93526	0.765153	0.766064	0.675847	0.684839	0.920375	0.933221	0.842634	0.994272	0.962584
GO0006396	0.465139	0.415316	0.563455	0.7222	0.49707	0.788168	0.844647	0.729936	0.680916	0.899397	0.691191	0.804854	0.828302	0.00452139	0.379675	0.0934952	0.351708	0.458687	0.859987	0.994727	0.860231	0.28372	0.848959	0.236769	0.213558	0.914218	0.840724	0.907029	0.947675	0.899741	0.936543	0.983392	0.866664	0.908624	0.88604	0.682062	0.835454	0.876477
GO0051276	0.445948	0.73989	0.726147	0.535726	0.479609	0.634005	0.703226	0.591195	0.4617	0.409145	0.813367	0.848912	0.591448	0.0266032	0.570716	0.347908	0.560154	0.397138	0.879694	0.654535	0.475061	0.793946	0.670876	0.581158	0.891776	0.900114	0.734607	0.71026	0.967501	0.797677	0.78463	0.914134	0.540318	0.714074	0.762595	0.998859	0.691989	0.84952
GO0006325	0.513799	0.786349	0.738667	0.400733	0.530938	0.851489	0.757083	0.54621	0.503004	0.501104	0.913505	0.926598	0.593278	0.0442471	0.728182	0.393536	0.681855	0.533204	0.909968	0.697245	0.656659	0.876869	0.711448	0.781125	0.991447	0.881882	0.898919	0.745502	0.984192	0.870759	0.838014	0.87133	0.751809	0.803245	0.727205	0.996721	0.664395	0.740427
GO0006323	0.553226	0.819847	0.769248	0.439642	0.575001	0.869616	0.782302	0.584148	0.537161	0.539314	0.926048	0.937031	0.624973	0.0391279	0.764671	0.441865	0.71103	0.56892	0.922698	0.726254	0.687205	0.894331	0.739827	0.806052	0.993221	0.896907	0.912988	0.772167	0.987772	0.844405	0.857206	0.891621	0.772461	0.825947	0.74664	0.997576	0.68076	0.760471
GO0032774	0.358965	0.60046	0.353798	0.721161	0.635349	0.989894	0.840114	0.725595	0.923275	0.960796	0.988122	0.938021	0.991399	0.384692	0.117463	0.0348337	0.978539	0.86706	0.957511	0.940762	0.944024	0.788669	0.519223	0.864167	0.81852	0.983699	0.903675	0.852371	0.767251	0.95514	0.849943	0.766438	0.995855	0.99553	0.994334	0.925458	0.999928	0.997824
GO0006351	0.358965	0.60046	0.353798	0.721161	0.635349	0.989894	0.840114	0.725595	0.923275	0.960796	0.988122	0.938021	0.991399	0.384692	0.117463	0.0348337	0.978539	0.86706	0.957511	0.940762	0.944024	0.788669	0.519223	0.864167	0.81852	0.983699	0.903675	0.852371	0.767251	0.95514	0.849943	0.766438	0.995855	0.99553	0.994334	0.925458	0.999928	0.997824
GO0016070	0.319747	0.454479	0.380413	0.728049	0.55809	0.989423	0.8887	0.706243	0.896574	0.975298	0.98957	0.97058	0.99473	0.0654263	0.142361	0.0258492	0.940446	0.802899	0.987783	0.988936	0.958427	0.684971	0.578429	0.724411	0.600331	0.988204	0.96025	0.920481	0.937205	0.979513	0.915926	0.908073	0.998099	0.999079	0.997063	0.900365	0.999962	0.999398
GO0010467	0.438699	0.539661	0.512571	0.900556	0.708857	0.993655	0.715467	0.817734	0.940187	0.989516	0.990938	0.969886	0.997382	0.0568877	0.196224	0.0440251	0.805337	0.774591	0.993276	0.965168	0.925651	0.69252	0.624266	0.63794	0.643065	0.985363	0.981116	0.980856	0.966611	0.979559	0.926986	0.961346	0.988376	0.998449	0.986809	0.954122	0.99876	0.99759
GO0006139	0.225949	0.464863	0.579429	0.80374	0.639898	0.989932	0.879315	0.685391	0.836031	0.982857	0.992235	0.984261	0.994861	0.0156528	0.268213	0.0257183	0.955945	0.635236	0.987133	0.979133	0.96688	0.875002	0.813589	0.84892	0.645613	0.972914	0.975703	0.983886	0.958787	0.99509	0.962571	0.939514	0.992645	0.999573	0.996034	0.990955	0.999954	0.999321
