# Supplementary material for: Comprehensive Identification and Annotation of Cell Type-Specific and Ubiquitous CTCF-Binding Sites in the Human Genome
Source: PLoS One. 2012 Jul 19;7(7):e41374. doi: 10.1371/journal.pone.0041374 (PMC3400636; doi:10.1371/journal.pone.0041374)
Supplement: Table S8 — MAST analysis of each CTCF-binding site type across 38 cell types. (XLSX) [file pone.0041374.s026.xlsx]

## Sheet: Sheet1
Table S8. MAST analysis of different kinds of CTCF binding sites across 38 cell types
	celltype	common	ubiquitous	total
AG04449	0.384186	0.640328	0.929158	0.671963
AG04450	0.138636	0.646395	0.926158	0.701234
AG09309	0.226	0.664875	0.918842	0.714311
AG09319	0.2412	0.668085	0.925947	0.705014
AG10803	0.12	0.6394	0.925632	0.687855
AoAF	0.213125	0.627237	0.925632	0.690644
BJ	0.203214	0.613596	0.918474	0.663826
CACO2	0.226667	0.689511	0.923316	0.700843
GM06990	0.218649	0.642821	0.910474	0.682726
GM12801	0.0229508	0.641412	0.872368	0.783571
GM12864	0.276667	0.644415	0.924421	0.70379
GM12865	0.296667	0.632563	0.908789	0.667018
GM12872	0.291111	0.648105	0.924737	0.707017
GM12873	0.2765	0.643279	0.926368	0.700094
GM12874	0.304839	0.660219	0.909895	0.694509
GM12875	0.295	0.652767	0.925421	0.708063
GM12878	0.189444	0.641217	0.883895	0.711205
HAsp	0.222105	0.692829	0.925789	0.745574
HBMEC	0.354909	0.642493	0.923789	0.662698
HCFaa	0.141875	0.641064	0.925421	0.692809
HCPEpiC	0.362278	0.639971	0.926474	0.655516
HEEpiC	0.253103	0.638378	0.925579	0.686746
HEK293T	0.425867	0.664294	0.926105	0.683495
Hela	0.172222	0.664769	0.902526	0.727255
HepG2	0.457917	0.661723	0.918842	0.665711
HL60	0.172222	0.708381	0.900368	0.755262
HMEC	0.400882	0.664508	0.929316	0.705951
HMF	0.174375	0.666425	0.921053	0.718984
HPAF	0.23	0.653111	0.925737	0.691158
HPF	0.1455	0.650214	0.924105	0.702873
HRE	0.28	0.645886	0.909789	0.699308
HRPEpiC	0.242692	0.700776	0.927105	0.731225
HUVEC	0.310435	0.6544	0.923842	0.710869
K562	0.353684	0.676844	0.924789	0.712059
NHEK	0.384516	0.645022	0.912895	0.691544
SAEC	0.271875	0.648425	0.918579	0.684524
SKNSH	0.4012	0.663415	0.928	0.697234
WERI	0.593176	0.720082	0.925632	0.746989
Average	0.270413	0.656296	0.919086	0.701618
