# Supplementary material for: Comprehensive Identification and Annotation of Cell Type-Specific and Ubiquitous CTCF-Binding Sites in the Human Genome
Source: PLoS One. 2012 Jul 19;7(7):e41374. doi: 10.1371/journal.pone.0041374 (PMC3400636; doi:10.1371/journal.pone.0041374)
Supplement: Table S9 — Significant GO nodes of the over-represented motifs correlated with cell type-specific and ubiquitous CTCF-binding sites across 38 cell types. (A) Significant GO nodes of the first three over-represented motifs within cell type-specific and ubiquitous CTCF-binding site combinations of 38 cell lines. (B) Significant GO nodes of the first five over-represented motifs within cell type-specific and ubiquitous CTCF-binding site combinations of 38 cell lines. (XLSX) [file pone.0041374.s027.xlsx]

## Sheet: Table S9A
Table S9A. Significant GO nodes of the first three overrepresented motifs correlated with cell type specific and ubiquitous CTCF binding sites across 38 cell types
Description	C38	C1	C33	C26	C18	C32	C29	C8	C37	C3	C31	C27	C2	C5	C30	C28	C35	C21	C23	C10	C7	C36	C13	C6	C9	C15	C25	C4	C34	C16	C14	C12	C19	C22	C20	C24	C11	C17	Ubiquitous
GO:0006412_translation	0.001414	0.001239	0.003976	0.0002984	0.004594	0.001415	0.001414	0.005309	0.0969	0.006624	0.03257	0.02219	0.003974	0.08754	0.001651	0.1311	0.001972	0.001229	0.002455	0.01316	0.001416	0.01049	0.00198	0.002467	0.003279	0.00109	0.001961	0.00124	0.001225	0.002485	0.001651	0.001651	0.001099	0.004957	0.002599	0.001409	0.003245	0.0008207	0.7248
GO:0006414_translational_elongation	0.002475	0.006308	0.04247	0.0002984	0.07391	0.1425	0.001414	0.08151	0.1929	0.06594	0.08703	0.07459	0.06954	0.006632	0.05227	0.05561	0.022	0.007148	0.04233	0.01316	0.008813	0.1176	0.02762	0.1188	0.04629	0.00109	0.0268	0.007933	0.002262	0.08853	0.01541	0.02202	0.00424	0.0301	0.002599	0.01972	0.01833	0.001989	0.7582
GO:0010467_gene_expression	0.001414	0.001239	0.00639	0.0002984	0.001969	0.001415	0.002474	0.001232	0.3279	0.009155	0.2964	0.002475	0.002484	0.08953	0.001651	0.04964	0.002465	0.001229	0.002455	0.00329	0.001416	0.003311	0.00198	0.002467	0.0118	0.00109	0.001961	0.00124	0.001225	0.05649	0.001651	0.001651	0.001099	0.003305	0.002599	0.001409	0.003245	0.0008207	0.7582
GO:0006396_RNA_processing	0.0429	0.001239	0.04247	0.0002984	0.001641	0.001415	0.3011	0.001232	0.3279	0.009155	0.313	0.002475	0.02815	0.1304	0.00619	0.08024	0.003287	0.001229	0.01964	0.004936	0.001416	0.003311	0.02773	0.04486	0.03869	0.002675	0.003268	0.0206	0.001633	0.06281	0.03797	0.03963	0.001099	0.007932	0.002599	0.003944	0.003245	0.002273	0.7582
GO:0006282_regulation_of_DNA_repair	0.171	0.07181	0.1077	0.04814	0.1116	0.1426	0.0995	0.09938	0.1436	0.1494	0.06273	0.09996	0.1145	0.06506	0.09691	0.1791	0.1072	0.1568	0.2205	0.04797	0.1595	0.1838	0.1345	0.06626	0.1211	0.188	0.1856	0.07814	0.2375	0.3522	0.229	0.3076	0.3146	0.112	0.1988	0.08236	0.07875	0.1353	0.6611
GO:0045739_positive_regulation_of_DNA_repair	0.4047	0.05797	0.1194	0.1843	0.1321	0.1251	0.1377	0.0802	0.1303	0.1179	0.03989	0.1019	0.08246	0.04794	0.08742	0.2105	0.1072	0.1515	0.2094	0.1964	0.1513	0.1842	0.1537	0.1665	0.181	0.188	0.09788	0.1351	0.1835	0.3038	0.1609	0.2831	0.2746	0.1261	0.1877	0.04163	0.1146	0.2414	0.7369
GO:0006413_translational_initiation	0.301	0.207	0.08718	0.05857	0.09043	0.2826	0.02249	0.08161	0.08552	0.1998	0.06273	0.09404	0.1113	0.4573	0.2113	0.4811	0.1934	0.1456	0.305	0.09709	0.1233	0.1637	0.06312	0.168	0.1748	0.1915	0.2251	0.1317	0.2162	0.08898	0.1274	0.2709	0.04353	0.02399	0.08497	0.03207	0.03846	0.06732	0.6237
GO:0045851_pH_reduction	0.2954	0.01052	0.2731	0.03106	0.03455	0.114	0.1853	0.04246	0.03991	0.1112	0.02153	0.0502	0.06436	0.06459	0.03789	0.3894	0.08065	0.09685	0.05662	0.07141	0.07894	0.07646	0.02762	0.04857	0.03943	0.1516	0.09652	0.2592	0.0424	0.08898	0.08264	0.1627	0.01937	0.05812	0.0586	0.05428	0.1031	0.4876	0.4869
GO:0051452_intracellular_pH_reduction	0.2367	0.01506	0.3543	0.09298	0.07265	0.3154	0.3011	0.06012	0.06422	0.1349	0.03769	0.07239	0.07485	0.1398	0.05657	0.4493	0.1072	0.1332	0.1002	0.1303	0.1233	0.1026	0.0351	0.07437	0.06977	0.188	0.09788	0.3142	0.1037	0.1656	0.1335	0.2352	0.05569	0.1114	0.1048	0.102	0.1031	0.6982	0.4818
GO:0030641_regulation_of_cellular_pH	0.4385	0.06284	0.3524	0.03133	0.07975	0.05787	0.1503	0.1941	0.1793	0.3648	0.08703	0.2045	0.1173	0.3513	0.2484	0.3648	0.1622	0.3782	0.132	0.2092	0.1554	0.1847	0.06367	0.08718	0.0819	0.3609	0.3403	0.2053	0.1361	0.2007	0.1609	0.3076	0.0678	0.1873	0.2309	0.1268	0.1241	0.5306	0.6359
GO:0016070_RNA_metabolic_process	0.171	0.03587	0.06238	0.0002984	0.002272	0.001415	0.4915	0.001232	0.3279	0.02923	0.4367	0.0033	0.07767	0.4801	0.04669	0.05794	0.06629	0.009829	0.2144	0.008884	0.001803	0.004967	0.03656	0.09129	0.2446	0.002675	0.04386	0.03393	0.0434	0.06181	0.3197	0.272	0.001099	0.0479	0.002599	0.05271	0.04595	0.003283	0.7582
GO:0006139_nucleobase,_nucleoside,_nucleotide_and_nucleic_acid_metabolic_process	0.0429	0.02661	0.01242	0.0002984	0.004632	0.01679	0.2541	0.02191	0.3279	0.01275	0.3947	0.0045	0.4724	0.304	0.09042	0.002457	0.04602	0.001229	0.1663	0.009871	0.01884	0.03057	0.03061	0.09129	0.1293	0.01349	0.02124	0.03195	0.001225	0.3309	0.2997	0.4008	0.004732	0.04363	0.01941	0.07048	0.01833	0.08526	0.7582
GO:0008152_metabolic_process	0.2935	0.05632	0.0001893	0.0002984	0.001641	0.001415	0.1503	0.007512	0.5057	0.009155	0.3947	0.005775	0.01928	0.2935	0.09691	0.02556	0.249	0.1617	0.2624	0.01426	0.005577	0.004967	0.1131	0.1924	0.2786	0.02529	0.1223	0.04264	0.1105	0.4892	0.2511	0.3042	0.001099	0.02399	0.002469	0.17	0.1638	0.0008207	0.7582
GO:0006807_nitrogen_compound_metabolic_process	0.1715	0.08187	0.1433	0.0002984	0.0053	0.02127	0.2854	0.08151	0.4245	0.01521	0.5662	0.0045	0.5548	0.2903	0.2363	0.01106	0.1152	0.01442	0.2624	0.008974	0.023	0.1318	0.2233	0.3696	0.2172	0.0331	0.03554	0.08277	0.05073	0.6451	0.4874	0.5591	0.01762	0.07977	0.0383	0.2797	0.0688	0.1709	0.7582
GO:0008380_RNA_splicing	0.2581	0.001239	0.01218	0.0002984	0.01261	0.001415	0.06184	0.006901	0.3955	0.007935	0.214	0.006187	0.2503	0.2903	0.00619	0.006553	0.05975	0.001229	0.05968	0.01247	0.005577	0.004967	0.4344	0.4618	0.03869	0.01731	0.2096	0.01983	0.07742	0.0826	0.1068	0.07348	0.003298	0.009915	0.03368	0.03759	0.01833	0.004634	0.7582
GO:0000398_nuclear_mRNA_splicing,_via_spliceosome	0.4106	0.01108	0.0004682	0.0002984	0.0053	0.001415	0.1385	0.02813	0.2785	0.007935	0.4397	0.02234	0.2934	0.5468	0.05227	0.08024	0.1549	0.05078	0.2049	0.01316	0.023	0.005349	0.3349	0.3365	0.03869	0.08538	0.3031	0.05476	0.3586	0.3038	0.2579	0.1115	0.00636	0.01145	0.01406	0.1112	0.08394	0.03081	0.7582
GO:0000377_RNA_splicing,_via_transesterification_reactions_with_bulged_adenosine_as_nucleophile	0.4106	0.01108	0.0004682	0.0002984	0.0053	0.001415	0.1385	0.02813	0.2785	0.007935	0.4397	0.02234	0.2934	0.5468	0.05227	0.08024	0.1549	0.05078	0.2049	0.01316	0.023	0.005349	0.3349	0.3365	0.03869	0.08538	0.3031	0.05476	0.3586	0.3038	0.2579	0.1115	0.00636	0.01145	0.01406	0.1112	0.08394	0.03081	0.7582
GO:0000375_RNA_splicing,_via_transesterification_reactions	0.4106	0.01108	0.0004682	0.0002984	0.0053	0.001415	0.1385	0.02813	0.2785	0.007935	0.4397	0.02234	0.2934	0.5468	0.05227	0.08024	0.1549	0.05078	0.2049	0.01316	0.023	0.005349	0.3349	0.3365	0.03869	0.08538	0.3031	0.05476	0.3586	0.3038	0.2579	0.1115	0.00636	0.01145	0.01406	0.1112	0.08394	0.03081	0.7582
GO:0016071_mRNA_metabolic_process	0.4165	0.03023	0.01551	0.0002984	0.04875	0.001415	0.3011	0.009859	0.3279	0.009155	0.3039	0.0126	0.2881	0.4483	0.09042	0.01966	0.1479	0.03194	0.1652	0.01049	0.003814	0.004967	0.3349	0.5423	0.181	0.01853	0.3978	0.02116	0.1116	0.3309	0.3792	0.3042	0.003298	0.04238	0.02847	0.05144	0.03029	0.01313	0.7582
GO:0006397_mRNA_processing	0.4047	0.006372	0.05494	0.0002984	0.09646	0.001415	0.2466	0.01025	0.5057	0.007935	0.3947	0.01866	0.4582	0.5987	0.04669	0.0486	0.1266	0.01404	0.2049	0.01316	0.005577	0.004967	0.4809	0.5671	0.06612	0.0255	0.3173	0.03195	0.1105	0.5275	0.2579	0.1595	0.01331	0.03877	0.04741	0.04203	0.01833	0.03081	0.7582
GO:0048522_positive_regulation_of_cellular_process	6.519e-05	0.0001158	0.001167	0.000197	0.0003536	0.0002025	0.01138	0.0007359	0.0007995	0.0007599	0.002292	0.01082	0.009322	0.003585	0.00934	0.2468	0.03553	0.004728	0.05662	0.009598	0.04798	0.04205	0.01151	0.0269	0.03943	0.0891	0.009588	0.3252	0.1361	0.08898	0.1123	0.229	0.2088	0.1149	0.1877	0.2112	0.3507	0.9848	3.717e-05
GO:0048518_positive_regulation_of_biological_process	6.519e-05	0.0001158	0.001856	0.000197	0.0003536	0.0002025	0.001653	0.0007359	0.0007995	0.0007599	0.002292	0.01082	0.009322	0.003107	0.003113	0.04039	0.03553	0.004728	0.05662	0.02026	0.07894	0.04205	0.02762	0.04259	0.06939	0.0891	0.009588	0.2453	0.1723	0.1412	0.1526	0.229	0.2746	0.1296	0.237	0.2744	0.4042	0.9848	3.717e-05
GO:0007420_brain_development	6.519e-05	0.0001158	0.002224	0.000197	0.0003536	0.0002025	0.01395	0.0007359	0.0007995	0.0007599	0.002619	0.01082	0.02581	0.004883	0.00934	0.02668	0.04675	0.04918	0.1002	0.02026	0.04798	0.05447	0.02762	0.04857	0.03943	0.03182	0.07511	0.3259	0.1619	0.3016	0.1526	0.197	0.442	0.2552	0.1549	0.2606	0.3507	0.9848	3.717e-05
GO:0007417_central_nervous_system_development	6.519e-05	0.0001158	0.00116	0.000197	0.0003536	0.0002025	0.007451	0.0007359	0.0007995	0.0007599	0.002619	0.01082	0.02581	0.002663	0.003113	0.01655	0.03553	0.004728	0.1002	0.007199	0.07227	0.04205	0.03004	0.04857	0.0819	0.004773	0.08218	0.2453	0.2185	0.3038	0.1718	0.1772	0.5133	0.2955	0.1819	0.5055	0.5979	0.9848	3.717e-05
GO:0032981_mitochondrial_respiratory_chain_complex_I_assembly	0.3931	0.09171	0.02784	0.09697	0.03456	0.02541	0.04558	0.05437	0.1071	0.1589	0.1239	0.1341	0.07403	0.02457	0.03176	0.04566	0.1328	0.09685	0.2677	0.1354	0.4252	0.1664	0.2195	0.08699	0.07959	0.1383	0.1568	0.2247	0.1027	0.09989	0.1184	0.1948	0.1979	0.3714	0.3057	0.6306	0.406	0.3111	0.05769
GO:0010257_NADH_dehydrogenase_complex_assembly	0.3931	0.09171	0.02784	0.09697	0.03456	0.02541	0.04558	0.05437	0.1071	0.1589	0.1239	0.1341	0.07403	0.02457	0.03176	0.04566	0.1328	0.09685	0.2677	0.1354	0.4252	0.1664	0.2195	0.08699	0.07959	0.1383	0.1568	0.2247	0.1027	0.09989	0.1184	0.1948	0.1979	0.3714	0.3057	0.6306	0.406	0.3111	0.05769
GO:0045893_positive_regulation_of_transcription,_DNA-dependent	6.519e-05	0.0001158	0.001167	0.000197	0.0003536	0.0002025	0.01159	0.0007359	0.0009257	0.0007599	0.002292	0.01082	0.01398	0.003585	0.00934	0.212	0.04675	0.09457	0.1045	0.007199	0.1233	0.05447	0.02762	0.06935	0.0819	0.188	0.09652	0.3402	0.3239	0.1151	0.2552	0.3019	0.501	0.3655	0.6573	0.3064	0.5017	0.9848	3.717e-05
GO:0051254_positive_regulation_of_RNA_metabolic_process	6.519e-05	0.0001158	0.001369	0.000197	0.0003536	0.0003713	0.01054	0.0007359	0.0009257	0.0007599	0.002619	0.02104	0.01398	0.004195	0.00934	0.2113	0.04675	0.09685	0.1138	0.009598	0.1513	0.05447	0.03375	0.07437	0.0819	0.1927	0.09788	0.3546	0.3449	0.1419	0.3135	0.3687	0.5029	0.4223	0.673	0.3582	0.5215	0.9848	3.717e-05
GO:0045935_positive_regulation_of_nucleobase,_nucleoside,_nucleotide_and_nucleic_acid_metabolic_process	6.519e-05	0.0001158	0.002224	0.000197	0.0006314	0.0004609	0.009574	0.0009813	0.0009257	0.008582	0.002619	0.02447	0.02097	0.006095	0.00934	0.1453	0.07602	0.09457	0.1372	0.02026	0.1233	0.0794	0.02762	0.06415	0.0819	0.188	0.09788	0.3355	0.3431	0.2093	0.2539	0.5267	0.442	0.4174	0.6573	0.2744	0.404	0.9848	3.717e-05
GO:0051173_positive_regulation_of_nitrogen_compound_metabolic_process	6.519e-05	0.0001158	0.002341	0.000197	0.0006314	0.0005941	0.009688	0.001472	0.0009257	0.008704	0.002619	0.02636	0.02581	0.006095	0.00934	0.1182	0.07602	0.09457	0.1372	0.02176	0.1233	0.07805	0.02762	0.06935	0.08886	0.188	0.1059	0.3362	0.3621	0.2189	0.2661	0.5267	0.501	0.4978	0.6573	0.3064	0.4273	0.9848	3.717e-05
GO:0010557_positive_regulation_of_macromolecule_biosynthetic_process	6.519e-05	0.0001158	0.0106	0.000197	0.001911	0.002391	0.02675	0.002473	0.001759	0.01115	0.002865	0.02525	0.02581	0.00956	0.00934	0.3419	0.09935	0.09457	0.2094	0.007199	0.138	0.08328	0.02762	0.099	0.1271	0.188	0.1198	0.4077	0.5109	0.2965	0.3523	0.5267	0.5133	0.4313	0.673	0.3215	0.5129	0.9848	3.717e-05
GO:0031325_positive_regulation_of_cellular_metabolic_process	6.519e-05	0.0001158	0.001369	0.000197	0.01035	0.003737	0.06172	0.003785	0.001759	0.01292	0.005979	0.02641	0.06436	0.04151	0.03183	0.4089	0.1238	0.09685	0.2094	0.02176	0.1233	0.1026	0.03004	0.099	0.1271	0.188	0.1892	0.5114	0.5109	0.2714	0.3895	0.5356	0.5029	0.5388	0.673	0.2792	0.4273	0.9848	3.717e-05
GO:0045941_positive_regulation_of_transcription	6.519e-05	0.0001158	0.001676	0.000197	0.00272	0.001828	0.02744	0.0009813	0.001759	0.01195	0.002865	0.02636	0.02581	0.009321	0.01588	0.3247	0.09863	0.1332	0.2205	0.02176	0.1554	0.1026	0.03467	0.09708	0.1206	0.2512	0.1892	0.5114	0.5109	0.3038	0.4106	0.5993	0.5363	0.5974	0.6921	0.3713	0.4634	0.9848	3.717e-05
GO:0009889_regulation_of_biosynthetic_process	6.519e-05	0.0001158	0.0001893	0.000197	0.004661	0.0004609	0.004675	0.0009813	0.001759	0.008612	0.003209	0.03194	0.06826	0.01902	0.05101	0.3578	0.2432	0.1608	0.2499	0.07359	0.1878	0.1646	0.03467	0.168	0.1899	0.3108	0.2579	0.4228	0.5769	0.3038	0.3005	0.6331	0.6352	0.6703	0.6642	0.3327	0.6335	0.9848	3.717e-05
GO:0031326_regulation_of_cellular_biosynthetic_process	6.519e-05	0.0001158	0.0001893	0.000197	0.004066	0.0004609	0.004675	0.001394	0.001759	0.008549	0.003209	0.03194	0.06826	0.01902	0.05101	0.3704	0.2408	0.1608	0.2499	0.07199	0.1878	0.1646	0.03467	0.168	0.1884	0.3108	0.2579	0.4228	0.5769	0.3038	0.299	0.6331	0.6352	0.6694	0.6591	0.3327	0.6344	0.9848	3.717e-05
GO:0051960_regulation_of_nervous_system_development	6.519e-05	0.0001158	0.002341	0.000197	0.0003536	0.0003713	0.001653	0.001472	0.001319	0.0007599	0.01025	0.02906	0.066	0.004195	0.00934	0.06769	0.06977	0.09685	0.1041	0.06927	0.244	0.1026	0.1122	0.137	0.1794	0.1915	0.09788	0.3259	0.3462	0.3038	0.5757	0.5356	0.5402	0.6041	0.673	0.4878	0.451	0.9848	3.717e-05
GO:0060284_regulation_of_cell_development	6.519e-05	0.0001158	0.0004682	0.000197	0.002326	0.0002025	0.0004274	0.003785	0.001759	0.002104	0.02012	0.02864	0.1004	0.006559	0.01588	0.03853	0.09863	0.1608	0.2205	0.2173	0.4252	0.1847	0.1879	0.1906	0.2604	0.3336	0.2251	0.3362	0.5424	0.3847	0.6572	0.6331	0.6352	0.6721	0.7074	0.5458	0.6335	0.9848	3.717e-05
GO:0009891_positive_regulation_of_biosynthetic_process	6.519e-05	0.0001158	0.03159	0.000197	0.003929	0.001828	0.01795	0.007359	0.003104	0.01844	0.01025	0.05683	0.06436	0.01758	0.01259	0.1851	0.1072	0.09685	0.2205	0.02176	0.236	0.1026	0.06519	0.168	0.2569	0.1915	0.2251	0.3546	0.5604	0.3038	0.5086	0.5837	0.6308	0.6289	0.7061	0.5458	0.6922	0.9848	3.717e-05
GO:0031328_positive_regulation_of_cellular_biosynthetic_process	6.519e-05	0.0001158	0.03159	0.000197	0.003817	0.001828	0.01785	0.00785	0.003328	0.01759	0.01025	0.05888	0.0644	0.01758	0.01362	0.1791	0.1072	0.09685	0.2205	0.02176	0.244	0.1026	0.07199	0.168	0.2604	0.1961	0.2251	0.3546	0.5617	0.3038	0.523	0.5879	0.6308	0.6492	0.7074	0.5458	0.713	0.9848	3.717e-05
GO:0010628_positive_regulation_of_gene_expression	6.519e-05	0.0001158	0.01136	0.000197	0.00442	0.002005	0.02568	0.003785	0.003328	0.01368	0.007257	0.03194	0.06059	0.01785	0.02242	0.3535	0.1176	0.1608	0.2499	0.03893	0.244	0.1584	0.06312	0.1551	0.184	0.3108	0.2374	0.6249	0.5604	0.3418	0.5403	0.6349	0.6352	0.654	0.7105	0.5914	0.6344	0.9848	3.717e-05
GO:0045944_positive_regulation_of_transcription_from_RNA_polymerase_II_promoter	6.519e-05	0.0001158	0.008943	0.000197	0.004066	0.0004609	0.01159	0.003785	0.001986	0.02615	0.01025	0.04882	0.06436	0.02065	0.02428	0.212	0.1142	0.1608	0.2679	0.05165	0.3394	0.1622	0.154	0.2825	0.3143	0.3336	0.2251	0.4913	0.583	0.4572	0.5757	0.6331	0.6816	0.6492	0.7105	0.6817	0.8103	0.9848	3.717e-05
GO:0051171_regulation_of_nitrogen_compound_metabolic_process	6.519e-05	0.0001158	0.0001893	0.000197	0.0003536	0.0002025	0.003548	0.006462	0.01438	0.01207	0.007334	0.1302	0.07857	0.009321	0.02428	0.2758	0.2062	0.2366	0.3055	0.1508	0.4427	0.1842	0.07847	0.204	0.2604	0.431	0.4503	0.3916	0.583	0.3786	0.4106	0.6349	0.6542	0.7198	0.673	0.6436	0.6482	0.9848	3.717e-05
GO:0019219_regulation_of_nucleobase,_nucleoside,_nucleotide_and_nucleic_acid_metabolic_process	6.519e-05	0.0001158	0.0001893	0.000197	0.0006314	0.0002025	0.003548	0.006462	0.01551	0.01306	0.00753	0.1407	0.08246	0.009321	0.02387	0.2785	0.2295	0.2568	0.3105	0.1575	0.4611	0.1905	0.09331	0.2256	0.2604	0.431	0.4543	0.4044	0.583	0.4241	0.4566	0.6349	0.6542	0.7198	0.6983	0.6616	0.6922	0.9848	3.717e-05
GO:0031323_regulation_of_cellular_metabolic_process	6.519e-05	0.0001158	0.0001893	0.0003699	0.0008287	0.0003713	0.02403	0.0007359	0.0009257	0.009119	0.002619	0.02636	0.06826	0.02089	0.05721	0.58	0.1782	0.1332	0.2094	0.08124	0.1554	0.1392	0.02762	0.1053	0.1092	0.2123	0.2374	0.6062	0.5277	0.2093	0.2163	0.5887	0.5402	0.6492	0.6573	0.2926	0.4385	0.9848	3.717e-05
GO:0019222_regulation_of_metabolic_process	6.519e-05	0.0001158	0.0001893	0.001318	0.003018	0.0005941	0.02967	0.001472	0.001759	0.0132	0.002619	0.0299	0.07429	0.03156	0.06527	0.5683	0.1993	0.1686	0.2205	0.1717	0.1802	0.1842	0.03375	0.1551	0.1206	0.2988	0.2788	0.7065	0.5277	0.2714	0.2539	0.6331	0.5568	0.6492	0.6696	0.3064	0.4385	0.9848	3.717e-05
GO:0010556_regulation_of_macromolecule_biosynthetic_process	0.0001812	0.0001158	0.0001893	0.0008714	0.01083	0.003487	0.01863	0.0007359	0.001759	0.01195	0.002619	0.02864	0.066	0.02742	0.06188	0.5716	0.2892	0.1704	0.2989	0.04496	0.1524	0.1637	0.02762	0.168	0.1271	0.3336	0.2733	0.54	0.5424	0.3038	0.2497	0.6331	0.6308	0.6492	0.6446	0.2744	0.451	0.9848	3.717e-05
GO:0010604_positive_regulation_of_macromolecule_metabolic_process	6.519e-05	0.0001158	0.0004682	0.000197	0.01724	0.006262	0.08145	0.003785	0.001759	0.01844	0.007404	0.02525	0.06826	0.06616	0.03418	0.5448	0.1882	0.1556	0.2205	0.02176	0.1519	0.1476	0.03467	0.1399	0.1271	0.2059	0.2374	0.6719	0.5277	0.3038	0.5086	0.6331	0.5402	0.6492	0.7061	0.3327	0.4489	0.9848	3.717e-05
GO:0080090_regulation_of_primary_metabolic_process	6.519e-05	0.0001158	0.0001893	0.0008714	0.00104	0.0007073	0.01863	0.003785	0.005412	0.01368	0.003209	0.04863	0.07975	0.02081	0.05657	0.5448	0.2188	0.221	0.2205	0.1354	0.244	0.1842	0.03467	0.1551	0.1271	0.3476	0.3825	0.6163	0.5109	0.3038	0.2661	0.6331	0.5568	0.6694	0.673	0.4593	0.4385	0.9848	3.717e-05
GO:0060255_regulation_of_macromolecule_metabolic_process	0.0001812	0.0001158	0.0001893	0.003714	0.004066	0.001609	0.03223	0.003785	0.005716	0.02445	0.003209	0.04863	0.08639	0.02728	0.06155	0.5683	0.2408	0.2342	0.2499	0.1828	0.2061	0.2278	0.03467	0.168	0.1271	0.3476	0.3825	0.7076	0.5109	0.3038	0.2661	0.6331	0.5568	0.6492	0.6696	0.4038	0.4273	0.9848	3.717e-05
GO:0010468_regulation_of_gene_expression	0.0008674	0.0001158	0.0001893	0.005679	0.01093	0.004713	0.04558	0.0009813	0.002748	0.02615	0.002619	0.03399	0.06826	0.0438	0.1285	0.6581	0.3117	0.2903	0.3105	0.1177	0.1585	0.2169	0.02762	0.168	0.1271	0.431	0.3825	0.7519	0.5409	0.3038	0.2539	0.6349	0.5955	0.6726	0.6573	0.3064	0.4385	0.9848	3.717e-05
GO:0051128_regulation_of_cellular_component_organization	0.003937	0.001823	0.07431	0.05051	0.0325	0.1445	0.5586	0.02799	0.009368	0.03982	0.03989	0.1302	0.2109	0.1398	0.1429	0.7129	0.3377	0.1704	0.2677	0.1717	0.2452	0.189	0.1436	0.2825	0.3003	0.2988	0.2532	0.8362	0.5424	0.2464	0.5086	0.6331	0.6352	0.5388	0.673	0.5055	0.6344	0.9848	3.717e-05
GO:0022008_neurogenesis	6.519e-05	0.0001158	0.0004682	0.000197	0.0003536	0.0002025	0.0004274	0.0009813	0.0009257	0.0007599	0.004802	0.03194	0.08246	0.006095	0.01231	0.06969	0.07602	0.1608	0.2094	0.1319	0.2951	0.2528	0.1122	0.168	0.2079	0.2676	0.09788	0.4859	0.5796	0.6089	0.5478	0.7114	0.6933	0.7198	0.7793	0.7084	0.7425	0.9848	3.717e-05
GO:0048468_cell_development	6.519e-05	0.0001158	0.0001893	0.000197	0.0003536	0.0002025	0.0008976	0.0007359	0.0007995	0.0007599	0.002619	0.03194	0.09077	0.004195	0.00934	0.1893	0.09863	0.09685	0.238	0.2173	0.1947	0.2612	0.1014	0.204	0.2604	0.188	0.09652	0.455	0.5783	0.6089	0.543	0.7114	0.7922	0.6726	0.673	0.6862	0.7899	0.9848	3.717e-05
GO:0048513_organ_development	6.519e-05	0.0001158	0.0007734	0.000197	0.0003536	0.0002025	0.0004274	0.0009813	0.0007995	0.0007599	0.00753	0.08901	0.06436	0.002663	0.00934	0.006487	0.0728	0.09457	0.2094	0.2173	0.2983	0.2114	0.1768	0.09708	0.2604	0.1375	0.1967	0.5305	0.583	0.6848	0.543	0.7785	0.8736	0.7146	0.7074	0.8962	0.886	0.9848	3.717e-05
GO:0021510_spinal_cord_development	6.519e-05	0.0001158	0.001211	0.0003699	0.003495	0.001018	0.007451	0.03406	0.01547	0.01844	0.0593	0.1299	0.1212	0.004195	0.02242	0.02668	0.04675	0.1295	0.2205	0.2889	0.4252	0.1842	0.4143	0.204	0.3807	0.2099	0.2483	0.2453	0.5109	0.6089	0.61	0.5332	0.6114	0.6492	0.706	0.8082	0.7899	0.9848	3.717e-05
GO:0021516_dorsal_spinal_cord_development	0.0008425	0.0003019	0.0164	0.005586	0.01179	0.005363	0.01159	0.08792	0.0565	0.02319	0.06273	0.2201	0.1574	0.0166	0.03425	0.1176	0.09717	0.1608	0.2499	0.3225	0.4602	0.2418	0.4256	0.2825	0.4671	0.2059	0.2579	0.3325	0.5424	0.6089	0.647	0.5267	0.6352	0.6492	0.673	0.8048	0.8309	0.9848	3.717e-05
GO:0050767_regulation_of_neurogenesis	6.519e-05	0.0001158	0.00232	0.0003699	0.004877	0.0002025	0.001584	0.007599	0.006435	0.008704	0.03989	0.08187	0.1524	0.009321	0.02072	0.03189	0.1072	0.1969	0.2452	0.3031	0.4693	0.307	0.3793	0.351	0.4048	0.3476	0.2579	0.3953	0.5424	0.5435	0.7304	0.7114	0.6816	0.7198	0.8089	0.6436	0.6821	0.9848	3.717e-05
GO:0045664_regulation_of_neuron_differentiation	6.519e-05	0.0001158	0.00116	0.000725	0.004877	0.0002025	0.0008976	0.04154	0.0213	0.02462	0.08961	0.2159	0.2524	0.006095	0.01588	0.008722	0.1072	0.1974	0.2499	0.3225	0.5482	0.3157	0.453	0.379	0.5277	0.3781	0.315	0.3257	0.583	0.6848	0.7932	0.7142	0.7001	0.732	0.8416	0.8444	0.8134	0.9848	3.717e-05
GO:0051674_localization_of_cell	6.519e-05	0.0001158	0.08781	0.000197	0.02423	0.00397	0.009574	0.03888	0.0213	0.01207	0.07168	0.2159	0.1163	0.1283	0.06155	0.2794	0.1591	0.1861	0.2679	0.4034	0.2564	0.3655	0.274	0.2825	0.4464	0.1915	0.2579	0.455	0.5604	0.6089	0.3151	0.6331	0.6894	0.6492	0.673	0.7208	0.8025	0.9848	3.717e-05
GO:0006928_cellular_component_movement	6.519e-05	0.0001158	0.08781	0.000197	0.02423	0.00397	0.009574	0.03888	0.0213	0.01207	0.07168	0.2159	0.1163	0.1283	0.06155	0.2794	0.1591	0.1861	0.2679	0.4034	0.2564	0.3655	0.274	0.2825	0.4464	0.1915	0.2579	0.455	0.5604	0.6089	0.3151	0.6331	0.6894	0.6492	0.673	0.7208	0.8025	0.9848	3.717e-05
GO:0001654_eye_development	0.006537	0.0003019	0.1147	0.005679	0.05087	0.0022	0.01891	0.1596	0.08043	0.1179	0.09046	0.3348	0.1656	0.0438	0.06527	0.244	0.2342	0.4498	0.4758	0.3456	0.4252	0.3157	0.4022	0.2825	0.4466	0.4427	0.2729	0.4913	0.583	0.6848	0.5403	0.669	0.6542	0.6492	0.706	0.704	0.8053	0.9848	3.717e-05
GO:0009893_positive_regulation_of_metabolic_process	6.519e-05	0.0001158	0.01966	0.002385	0.04688	0.009124	0.1088	0.02799	0.009917	0.07569	0.03769	0.1238	0.1574	0.1398	0.08138	0.4502	0.3013	0.2092	0.3106	0.1105	0.3572	0.2685	0.1222	0.2825	0.3684	0.3336	0.397	0.7503	0.583	0.5227	0.6254	0.7252	0.6542	0.6969	0.8593	0.6306	0.6991	0.9848	3.717e-05
GO:0045449_regulation_of_transcription	0.0002364	0.0001158	0.0001893	0.004599	0.01143	0.00297	0.01891	0.003785	0.01026	0.03168	0.009778	0.1428	0.1212	0.04305	0.1317	0.5988	0.3788	0.4309	0.4758	0.2173	0.4252	0.3157	0.1014	0.2825	0.3087	0.5486	0.5151	0.6745	0.6038	0.4621	0.523	0.7524	0.6897	0.7771	0.7061	0.5914	0.6924	0.9848	3.717e-05
GO:0009792_embryonic_development_ending_in_birth_or_egg_hatching	6.519e-05	0.0001158	0.02241	0.005106	0.004661	0.00297	0.03811	0.006462	0.009194	0.036	0.02012	0.1302	0.1067	0.02081	0.04141	0.508	0.1846	0.1704	0.3039	0.4035	0.3585	0.3157	0.2657	0.3177	0.3687	0.2914	0.3544	0.6996	0.5167	0.5929	0.543	0.6614	0.7001	0.6613	0.6573	0.6817	0.816	0.9848	3.717e-05
GO:0043009_chordate_embryonic_development	6.519e-05	0.0001158	0.02626	0.007626	0.006558	0.00397	0.04046	0.01042	0.01143	0.05015	0.03386	0.1428	0.1563	0.02699	0.06155	0.5374	0.2342	0.221	0.3546	0.4792	0.4252	0.3655	0.3797	0.379	0.4466	0.3336	0.4503	0.7519	0.5424	0.6089	0.5754	0.7227	0.7978	0.6969	0.673	0.7658	0.8505	0.9848	3.717e-05
GO:0030900_forebrain_development	6.519e-05	0.0001158	0.02541	0.005106	0.1013	0.03054	0.2573	0.02728	0.01143	0.01207	0.0523	0.07364	0.2629	0.2705	0.1526	0.3212	0.3395	0.4016	0.4758	0.384	0.4064	0.4422	0.3125	0.3495	0.3994	0.431	0.4543	0.7538	0.583	0.6089	0.5881	0.6735	0.7663	0.7198	0.7105	0.6562	0.7899	0.9848	3.717e-05
GO:0043010_camera-type_eye_development	0.004762	0.0003799	0.3845	0.03042	0.1476	0.01626	0.1191	0.09659	0.04526	0.1398	0.06264	0.3169	0.2188	0.1568	0.258	0.5562	0.3375	0.4518	0.501	0.4035	0.3617	0.4437	0.3462	0.379	0.4464	0.4427	0.2712	0.7519	0.583	0.7	0.5472	0.7142	0.665	0.6694	0.706	0.6817	0.7899	0.9848	3.717e-05
GO:0007015_actin_filament_organization	0.1862	0.06348	0.4611	0.02912	0.04412	0.1759	0.5046	0.1981	0.181	0.1494	0.1119	0.2578	0.1633	0.2126	0.171	0.6917	0.4277	0.3278	0.3546	0.3387	0.4611	0.3329	0.272	0.379	0.5084	0.3108	0.3825	0.7519	0.5611	0.5458	0.5059	0.6331	0.6273	0.6492	0.673	0.7228	0.6344	0.982	0.02925
GO:0042330_taxis	0.06703	0.1898	0.1472	0.004599	0.007784	0.002516	0.08863	0.4489	0.3334	0.1104	0.4397	0.5212	0.3693	0.02081	0.03183	0.3419	0.07602	0.09685	0.2205	0.3069	0.4611	0.1392	0.5471	0.413	0.6243	0.1375	0.2189	0.2453	0.5109	0.6089	0.5086	0.229	0.5653	0.3655	0.5608	0.7517	0.6406	0.9848	0.2444
GO:0006935_chemotaxis	0.06703	0.1898	0.1472	0.004599	0.007784	0.002516	0.08863	0.4489	0.3334	0.1104	0.4397	0.5212	0.3693	0.02081	0.03183	0.3419	0.07602	0.09685	0.2205	0.3069	0.4611	0.1392	0.5471	0.413	0.6243	0.1375	0.2189	0.2453	0.5109	0.6089	0.5086	0.229	0.5653	0.3655	0.5608	0.7517	0.6406	0.9848	0.2444
GO:0021533_cell_differentiation_in_hindbrain	0.04805	0.003141	0.01917	0.003625	0.01143	0.000798	0.004675	0.3373	0.2785	0.1164	0.2744	0.5456	0.2684	0.01758	0.02242	0.06969	0.07602	0.2375	0.2499	0.3345	0.5844	0.2259	0.5333	0.1986	0.4671	0.3108	0.4503	0.2453	0.5109	0.6457	0.5761	0.584	0.5402	0.6492	0.673	0.8894	0.7425	0.9848	0.0002466
GO:0008156_negative_regulation_of_DNA_replication	0.6821	0.1626	0.1003	0.09751	0.1368	0.03264	0.2285	0.3149	0.3334	0.1095	0.2468	0.2201	0.3126	0.05887	0.07868	0.1225	0.2971	0.3866	0.4758	0.2117	0.5588	0.3157	0.4179	0.4836	0.5052	0.278	0.4557	0.3362	0.444	0.3038	0.5472	0.5356	0.6308	0.5339	0.6573	0.6185	0.271	0.8477	0.3536
GO:0070584_mitochondrion_morphogenesis	0.2935	0.4462	0.406	0.05409	0.5188	0.1493	0.1377	0.4074	0.3276	0.258	0.1394	0.2445	0.545	0.08754	0.04809	0.01474	0.7194	0.1493	0.0441	0.146	0.0905	0.3786	0.502	0.6418	0.4179	0.365	0.2506	0.08401	0.3608	0.6117	0.7321	0.4221	0.3311	0.7517	0.09214	0.2982	0.07368	0.1396	0.6831
GO:0034961_cellular_macromolecule_biosynthetic_process	0.1713	0.199	0.09461	0.02019	0.3065	0.01189	0.08114	0.1164	0.478	0.2819	0.4617	0.5456	0.5405	0.6906	0.1175	0.7051	0.6943	0.3698	0.5757	0.1161	0.1069	0.5368	0.2851	0.3161	0.5238	0.09527	0.146	0.2592	0.08553	0.09989	0.342	0.2396	0.1106	0.3511	0.07174	0.2112	0.1246	0.1934	0.7582
GO:0043284_macromolecule_biosynthetic_process	0.1715	0.287	0.07177	0.02292	0.2923	0.01743	0.08114	0.136	0.5548	0.2854	0.479	0.5485	0.5548	0.7158	0.1518	0.7208	0.6949	0.4009	0.5813	0.1217	0.1197	0.5316	0.3484	0.4041	0.5238	0.145	0.1486	0.3142	0.07742	0.09989	0.4266	0.3286	0.1451	0.4092	0.07174	0.2112	0.1499	0.2194	0.7582
GO:0034645_cellular_macromolecule_biosynthetic_process	0.4065	0.3855	0.08556	0.02532	0.1819	0.01189	0.08114	0.1179	0.5621	0.1431	0.5146	0.5479	0.4042	0.8168	0.09691	0.8218	0.6943	0.5844	0.6697	0.2201	0.1433	0.4154	0.4116	0.4145	0.5474	0.2842	0.1568	0.4555	0.4424	0.09989	0.5757	0.3487	0.06947	0.5815	0.07213	0.3269	0.3758	0.03816	0.7582
GO:0009059_macromolecule_biosynthetic_process	0.5824	0.4948	0.114	0.09747	0.3001	0.02127	0.09895	0.2853	0.6236	0.2044	0.5388	0.5508	0.4582	0.8535	0.1638	0.8943	0.6949	0.6562	0.7419	0.4488	0.1507	0.5316	0.4748	0.4333	0.5839	0.4529	0.2275	0.5023	0.521	0.1265	0.647	0.4629	0.1231	0.6933	0.0828	0.3675	0.4528	0.09161	0.7582
GO:0044238_primary_metabolic_process	0.4335	0.1076	0.0001893	0.0002984	0.001641	0.01752	0.3011	0.006901	0.5752	0.009155	0.6297	0.02234	0.03765	0.5468	0.3148	0.05561	0.3538	0.3388	0.4484	0.01758	0.023	0.03193	0.1131	0.5198	0.4179	0.05819	0.2096	0.2396	0.2143	0.6418	0.3252	0.4682	0.001099	0.0301	0.002599	0.2815	0.3282	0.0008207	0.7582
GO:0044237_cellular_metabolic_process	0.2935	0.1613	0.0001893	0.0002984	0.001641	0.01621	0.2026	0.006901	0.4687	0.009155	0.6485	0.01866	0.09546	0.5468	0.3584	0.006553	0.3354	0.3131	0.4999	0.02086	0.02746	0.02732	0.3349	0.5423	0.6243	0.04225	0.2833	0.2428	0.3755	0.735	0.5895	0.6786	0.001979	0.03175	0.002599	0.2134	0.3507	0.0008207	0.7582
GO:0044260_cellular_macromolecule_metabolic_process	0.4269	0.3478	0.0001893	0.0002984	0.001969	0.02462	0.3011	0.005309	0.3097	0.02424	0.3003	0.212	0.1152	0.7808	0.359	0.1057	0.4492	0.5325	0.7419	0.02735	0.1069	0.03643	0.3988	0.6318	0.3484	0.1993	0.5958	0.5769	0.4966	0.3038	0.5478	0.8595	0.003298	0.05021	0.002599	0.03849	0.1031	0.0008207	0.7582
GO:0034960_cellular_macromolecule_metabolic_process	0.4578	0.388	0.0001893	0.0002984	0.002272	0.01743	0.4036	0.005309	0.4135	0.0624	0.3467	0.1983	0.1676	0.7298	0.3349	0.1143	0.509	0.5911	0.77	0.0181	0.1219	0.02821	0.459	0.7037	0.4466	0.1957	0.6824	0.6002	0.502	0.4307	0.6197	0.9063	0.004166	0.09757	0.002599	0.05997	0.1031	0.0008207	0.7582
GO:0043170_macromolecule_metabolic_process	0.4054	0.3434	0.0001893	0.0002984	0.0053	0.02998	0.2854	0.006901	0.3558	0.04414	0.3637	0.2709	0.1188	0.7158	0.3459	0.4164	0.4975	0.541	0.6793	0.06847	0.1219	0.05774	0.3349	0.6011	0.4645	0.3433	0.4809	0.4488	0.3697	0.389	0.5478	0.7312	0.003298	0.05821	0.01347	0.09587	0.1031	0.0008207	0.7582
GO:0043283_macromolecule_metabolic_process	0.4562	0.4533	0.0001893	0.0002984	0.0053	0.03755	0.3933	0.006901	0.4726	0.0921	0.4561	0.2834	0.143	0.7158	0.3713	0.473	0.509	0.6555	0.7419	0.03518	0.2044	0.03193	0.39	0.6641	0.5345	0.3965	0.6458	0.4955	0.4205	0.6081	0.6572	0.8233	0.003298	0.05153	0.0127	0.1365	0.1796	0.0008207	0.7582
GO:0000279_M_phase	0.8215	0.6915	0.0874	0.6218	0.02897	0.1666	0.1088	0.09925	0.709	0.2612	0.2993	0.7076	0.2701	0.928	0.6773	0.3986	0.3884	0.5844	0.3927	0.02942	0.1507	0.3025	0.4809	0.5423	0.6769	0.278	0.3681	0.4454	0.3641	0.8563	0.5757	0.5993	0.848	0.04353	0.01406	0.1112	0.271	0.2957	0.7582
GO:0000245_spliceosome_assembly	0.7798	0.5789	0.1799	0.0401	0.3631	0.04187	0.3895	0.04651	0.3428	0.009155	0.3947	0.2696	0.5449	0.6229	0.1174	0.05579	0.504	0.391	0.3428	0.1585	0.0905	0.4572	0.5388	0.5963	0.3508	0.5174	0.5421	0.1084	0.6075	0.3038	0.6472	0.2873	0.1367	0.01145	0.307	0.4045	0.4547	0.05121	0.7582
GO:0022618_ribonucleoprotein_complex_assembly	0.7515	0.4387	0.02495	0.05857	0.4377	0.6321	0.4036	0.08151	0.4135	0.04553	0.4644	0.1927	0.4568	0.7289	0.4118	0.113	0.3852	0.6101	0.5757	0.2173	0.3243	0.3812	0.5333	0.5102	0.2786	0.6072	0.7118	0.4518	0.5843	0.3038	0.5478	0.1283	0.1568	0.06772	0.673	0.5458	0.5354	0.2837	0.7582
GO:0051084_'de_novo'_posttranslational_protein_folding	0.4269	0.2822	0.2286	0.1763	0.1112	0.02127	0.2564	0.02662	0.3279	0.3817	0.4367	0.2226	0.3913	0.2935	0.3942	0.1143	0.3309	0.391	0.3109	0.2047	0.1742	0.4191	0.4297	0.6587	0.2604	0.5707	0.3031	0.5747	0.5424	0.4588	0.5895	0.7312	0.05154	0.3017	0.1979	0.3327	0.3507	0.1534	0.7582
GO:0006458_'de_novo'_protein_folding	0.6044	0.4242	0.2675	0.2595	0.09646	0.03739	0.3011	0.02813	0.608	0.6776	0.5662	0.1596	0.3336	0.6906	0.6798	0.2775	0.4096	0.5452	0.6496	0.2055	0.4778	0.3445	0.5579	0.7552	0.5345	0.6072	0.3189	0.6389	0.6591	0.6594	0.7273	0.8762	0.04262	0.5815	0.2748	0.5759	0.6313	0.15	0.7582
GO:0043543_protein_amino_acid_acylation	0.7148	0.4487	0.06386	0.4109	0.1708	0.1579	0.6588	0.176	0.3279	0.6855	0.4397	0.01866	0.2257	0.7298	0.8385	0.1057	0.7473	0.391	0.6456	0.202	0.3372	0.4572	0.502	0.5281	0.5406	0.7555	0.4805	0.2359	0.5435	0.4479	0.7922	0.5063	0.01762	0.7382	0.1028	0.2466	0.6029	0.2194	0.7386
GO:0007271_synaptic_transmission,_cholinergic	0.06632	0.008326	0.5191	0.4342	0.03881	0.3446	0.5176	0.1631	0.1342	0.3002	0.1514	0.168	0.4477	0.0495	0.4059	0.4547	0.1591	0.183	0.1095	0.4035	0.244	0.3157	0.07847	0.1551	0.1271	0.1915	0.2374	0.8343	0.1723	0.3334	0.5086	0.5267	0.3315	0.3655	0.2937	0.2744	0.3507	0.8344	0.1385
GO:0016052_carbohydrate_catabolic_process	0.1514	0.08284	0.767	0.4986	0.4989	0.6391	0.3678	0.4243	0.3038	0.2237	0.2971	0.4915	0.4787	0.5004	0.2954	0.4811	0.3876	0.04119	0.2144	0.478	0.4465	0.3655	0.4809	0.4152	0.04629	0.2988	0.0268	0.1901	0.2704	0.4892	0.2758	0.1964	0.5653	0.3054	0.655	0.1278	0.2335	0.08764	0.6521
GO:0034660_ncRNA_metabolic_process	0.1514	0.3843	0.4266	0.3362	0.0485	0.5203	0.6172	0.01858	0.4696	0.881	0.8637	0.02234	0.2717	0.824	0.3713	0.8218	0.04579	0.05818	0.2624	0.08252	0.03081	0.6166	0.03631	0.2971	0.3656	0.06897	0.01743	0.4438	0.04377	0.1788	0.3352	0.5159	0.1622	0.3947	0.02847	0.2548	0.1246	0.2218	0.7582
GO:0022613_ribonucleoprotein_complex_biogenesis	0.4529	0.3209	0.2379	0.02166	0.0646	0.2994	0.8864	0.006901	0.7433	0.3168	0.7716	0.008909	0.5103	0.6906	0.2924	0.5547	0.1439	0.2941	0.3768	0.03931	0.1961	0.6352	0.5305	0.5718	0.3518	0.4187	0.2833	0.3927	0.3026	0.3736	0.6883	0.4625	0.04464	0.6704	0.1532	0.5131	0.406	0.4162	0.7582
GO:0016072_rRNA_metabolic_process	0.5018	0.5174	0.7351	0.2636	0.07391	0.6321	0.8954	0.04651	0.608	0.7276	0.833	0.02234	0.3479	0.7454	0.3148	0.9031	0.2717	0.1617	0.4319	0.109	0.1209	0.7421	0.5807	0.5423	0.6552	0.1878	0.07236	0.6389	0.3007	0.372	0.7929	0.8604	0.1622	0.4589	0.04854	0.3786	0.406	0.6003	0.7582
GO:0070727_cellular_macromolecule_localization	0.4529	0.2526	0.1411	0.02478	0.4643	0.8235	0.1617	0.6858	0.6292	0.772	0.6947	0.6618	0.7868	0.796	0.3942	0.8411	0.3423	0.2333	0.5214	0.05588	0.4209	0.7405	0.3815	0.5392	0.2508	0.3492	0.3708	0.2304	0.2596	0.627	0.4335	0.3491	0.4334	0.4288	0.6013	0.2217	0.271	0.5152	0.705
GO:0034613_cellular_protein_localization	0.4529	0.305	0.1506	0.04313	0.4759	0.8477	0.1639	0.7063	0.6909	0.772	0.7112	0.6618	0.8056	0.802	0.4023	0.8581	0.3623	0.2362	0.5386	0.08383	0.4695	0.7622	0.4324	0.5478	0.2508	0.365	0.4245	0.2304	0.2879	0.7082	0.4934	0.376	0.449	0.4343	0.6153	0.2361	0.3054	0.52	0.6965
GO:0007606_sensory_perception_of_chemical_stimulus	0.8215	0.002482	0.4427	0.001987	0.003322	0.8911	0.7154	0.002492	0.003321	0.03378	0.00332	0.003321	0.003322	0.003321	0.908	0.06185	0.6943	0.9457	0.9181	0.9598	0.9226	0.9557	0.002479	0.003314	0.003316	0.003311	0.002488	0.911	0.003307	0.002485	0.00331	0.003311	0.003306	0.9687	0.9767	0.986	0.9736	0.9848	0.003328
GO:0007608_sensory_perception_of_smell	0.8215	0.002482	0.4308	0.001987	0.003322	0.8911	0.707	0.002492	0.003321	0.03691	0.00332	0.003321	0.003322	0.003321	0.9081	0.1176	0.7899	0.9457	0.9181	0.9598	0.9226	0.9557	0.002479	0.003314	0.003316	0.003311	0.002488	0.9156	0.003307	0.002485	0.00331	0.003311	0.003306	0.9687	0.9767	0.986	0.9736	0.9848	0.003328
GO:0007600_sensory_perception	0.8215	0.002482	0.1064	0.001987	0.07688	0.6651	0.2865	0.002492	0.04982	0.1431	0.01245	0.007472	0.0299	0.132	0.925	0.01655	0.8026	0.9457	0.9181	0.9598	0.9226	0.9557	0.1325	0.05744	0.004975	0.07379	0.1483	0.8868	0.062	0.1392	0.09931	0.2396	0.03844	0.9687	0.9767	0.986	0.9736	0.9848	0.004993
GO:0050890_cognition	0.8215	0.02708	0.08383	0.0149	0.2563	0.5245	0.1803	0.01994	0.2006	0.307	0.1594	0.1341	0.08194	0.1758	0.9159	0.008752	0.935	0.9457	0.9181	0.9598	0.9226	0.9557	0.4624	0.1879	0.1085	0.2833	0.3708	0.8755	0.2278	0.5124	0.2984	0.5762	0.2718	0.9687	0.9767	0.986	0.9736	0.9848	0.05769
GO:0048731_system_development	6.519e-05	0.0001158	0.0007734	0.000197	0.0003536	0.0002025	0.0004274	0.001472	0.0007995	0.0007599	0.01164	0.2052	0.1163	0.00233	0.00934	0.005148	0.07602	0.09685	0.2499	0.4035	0.5006	0.4468	0.4179	0.204	0.5001	0.188	0.2374	0.7076	0.7351	0.8453	0.7075	0.9375	0.9029	0.8761	0.8988	0.9457	0.9466	0.9848	3.717e-05
GO:0048699_generation_of_neurons	6.519e-05	0.0001158	0.002395	0.000197	0.004066	0.0002025	0.0004274	0.003785	0.002931	0.01207	0.03049	0.1302	0.2684	0.01785	0.03926	0.06969	0.1789	0.3857	0.3245	0.4035	0.5092	0.5079	0.4022	0.379	0.4466	0.4664	0.2733	0.7273	0.6787	0.7264	0.7273	0.8948	0.8963	0.8437	0.9015	0.8653	0.8505	0.9848	3.717e-05
GO:0007399_nervous_system_development	6.519e-05	0.0001158	0.003593	0.000197	0.001263	0.0002025	0.0008976	0.004416	0.0009257	0.01251	0.03631	0.1448	0.3964	0.007865	0.02428	0.05075	0.1307	0.1655	0.3839	0.478	0.5612	0.544	0.5068	0.4631	0.5345	0.2988	0.2978	0.6673	0.7707	0.8456	0.8509	0.937	0.9029	0.9005	0.9166	0.9457	0.9446	0.9848	3.717e-05
GO:0048856_anatomical_structure_development	6.519e-05	0.0001158	0.0007734	0.000197	0.0003536	0.0002025	0.0004274	0.003785	0.0007995	0.009879	0.03049	0.3169	0.2305	0.00233	0.01231	0.008722	0.1034	0.1667	0.3518	0.5778	0.5844	0.5639	0.5333	0.3365	0.5606	0.2059	0.3965	0.7538	0.7797	0.8611	0.8238	0.9514	0.9164	0.9062	0.9222	0.9483	0.9482	0.9848	3.717e-05
GO:0007275_multicellular_organismal_development	6.519e-05	0.0001158	0.0007734	0.000197	0.0003536	0.0002025	0.0004274	0.0007359	0.0007995	0.008549	0.01303	0.2415	0.2305	0.004195	0.01581	0.008722	0.1591	0.2366	0.4513	0.4792	0.5703	0.544	0.4758	0.379	0.5606	0.2644	0.4503	0.7519	0.8076	0.8509	0.8257	0.9514	0.9164	0.9062	0.9227	0.9457	0.9466	0.9848	3.717e-05
GO:0032502_developmental_process	6.519e-05	0.0001158	0.0007734	0.000197	0.0003536	0.0002025	0.0004274	0.0007359	0.0007995	0.01017	0.02354	0.2578	0.3386	0.003107	0.01581	0.01559	0.1972	0.3052	0.501	0.5471	0.6131	0.6307	0.5333	0.4152	0.6023	0.2988	0.4663	0.7607	0.8256	0.8611	0.8509	0.9514	0.9181	0.9062	0.9261	0.9483	0.9489	0.9848	3.717e-05
GO:0045165_cell_fate_commitment	6.519e-05	0.0001158	0.001211	0.000197	0.004035	0.0002025	0.009574	0.0574	0.01941	0.02451	0.0778	0.2673	0.2066	0.01785	0.05101	0.1851	0.1072	0.3052	0.3994	0.2843	0.5634	0.4422	0.5283	0.4618	0.5271	0.4313	0.4663	0.5601	0.6038	0.7	0.6572	0.8544	0.7933	0.7665	0.8593	0.9229	0.8594	0.9848	3.717e-05
GO:0007423_sensory_organ_development	6.519e-05	0.0001158	0.006394	0.002611	0.01025	0.0002025	0.0008976	0.09629	0.02057	0.07569	0.1343	0.3207	0.3247	0.02185	0.06103	0.06969	0.2342	0.4598	0.501	0.3099	0.5676	0.3157	0.5333	0.3802	0.5345	0.5249	0.4663	0.5114	0.6983	0.6848	0.6572	0.8344	0.8472	0.732	0.8667	0.8444	0.8863	0.9848	3.717e-05
GO:0040011_locomotion	6.519e-05	0.001068	0.08553	0.004531	0.007784	0.001018	0.01159	0.1967	0.1335	0.05015	0.3003	0.4301	0.3247	0.09494	0.07745	0.212	0.1925	0.2449	0.4181	0.3973	0.5185	0.3157	0.5333	0.4838	0.5707	0.2425	0.4663	0.5114	0.583	0.6652	0.5478	0.6349	0.8256	0.6726	0.7571	0.8738	0.9008	0.9848	3.717e-05
GO:0065007_biological_regulation	6.519e-05	0.0001158	0.0007734	0.000197	0.0003536	0.0002025	0.0004274	0.1967	0.1043	0.0374	0.2744	0.5508	0.3693	0.005932	0.01588	0.07298	0.1611	0.1932	0.4354	0.4792	0.7498	0.4287	0.6455	0.6284	0.7154	0.4347	0.5778	0.3546	0.7742	0.8279	0.7965	0.7213	0.9029	0.8862	0.9015	0.9483	0.9466	0.9848	3.717e-05
GO:0050789_regulation_of_biological_process	6.519e-05	0.0001158	0.001211	0.000197	0.0003536	0.0002025	0.0008976	0.1759	0.07945	0.05023	0.2452	0.5456	0.4422	0.01049	0.02428	0.1622	0.2342	0.2342	0.501	0.4792	0.7383	0.4437	0.6409	0.6856	0.7336	0.4826	0.5877	0.455	0.8099	0.8279	0.7965	0.7931	0.9029	0.8868	0.9052	0.9481	0.9482	0.9848	3.717e-05
GO:0021515_cell_differentiation_in_spinal_cord	0.0008674	0.002438	0.006394	0.004599	0.04555	0.002516	0.01521	0.2403	0.1342	0.1719	0.3731	0.4213	0.4684	0.02457	0.06155	0.0705	0.2342	0.3782	0.5411	0.5756	0.6941	0.5246	0.637	0.5898	0.6641	0.5065	0.5565	0.4077	0.7222	0.8279	0.8335	0.7142	0.8472	0.7973	0.8988	0.9337	0.9286	0.9848	3.717e-05
GO:0021527_spinal_cord_association_neuron_differentiation	0.01917	0.005745	0.08015	0.05412	0.03272	0.01843	0.08863	0.3013	0.2062	0.1173	0.3179	0.4572	0.4504	0.0413	0.1322	0.3578	0.1925	0.43	0.3834	0.4901	0.6131	0.4422	0.5423	0.4415	0.5606	0.4313	0.5151	0.5021	0.583	0.7283	0.7687	0.6331	0.6816	0.7198	0.8416	0.8962	0.8594	0.9848	0.0007743
GO:0045665_negative_regulation_of_neuron_differentiation	0.02004	0.003748	0.09708	0.0301	0.01999	0.01709	0.06119	0.3321	0.1517	0.2709	0.3828	0.5485	0.5347	0.0495	0.2494	0.1549	0.1528	0.4486	0.3994	0.5471	0.6131	0.5079	0.5333	0.4415	0.5606	0.4826	0.5877	0.5114	0.6152	0.7599	0.7965	0.7524	0.6816	0.8289	0.8739	0.9004	0.7899	0.9848	0.0008133
GO:0016477_cell_migration	6.519e-05	0.002923	0.02626	0.01002	0.08122	0.007863	0.002532	0.2471	0.203	0.09032	0.4397	0.4551	0.4504	0.2895	0.2114	0.1433	0.3994	0.4498	0.501	0.4792	0.6131	0.544	0.5494	0.558	0.607	0.4114	0.5877	0.5728	0.6787	0.7	0.6472	0.8097	0.8963	0.7787	0.8908	0.8962	0.9008	0.9848	3.717e-05
GO:0006357_regulation_of_transcription_from_RNA_polymerase_II_promoter	6.519e-05	0.0001158	0.002477	0.000197	0.04354	0.0003713	0.004675	0.009015	0.01851	0.1164	0.02153	0.2201	0.1212	0.09494	0.2416	0.216	0.3395	0.5106	0.5161	0.4792	0.5844	0.4923	0.3054	0.4524	0.5606	0.6912	0.5303	0.7076	0.7707	0.6848	0.6572	0.8848	0.8316	0.7789	0.8739	0.8048	0.8594	0.9848	3.717e-05
GO:0048869_cellular_developmental_process	6.519e-05	0.0001158	0.0099	0.000197	0.0008287	0.0002025	0.0008976	0.006462	0.007363	0.03168	0.04889	0.3073	0.4228	0.05116	0.08138	0.1937	0.53	0.4783	0.5775	0.5926	0.5844	0.648	0.508	0.5176	0.5345	0.4313	0.5151	0.8236	0.7969	0.8279	0.8226	0.9398	0.905	0.904	0.9052	0.9277	0.9446	0.9848	3.717e-05
GO:0030154_cell_differentiation	6.519e-05	0.0001158	0.01059	0.000197	0.00104	0.0002025	0.0008976	0.008063	0.009368	0.03168	0.06273	0.3616	0.4504	0.0551	0.1008	0.2113	0.53	0.4783	0.579	0.6131	0.6131	0.648	0.5333	0.5546	0.5707	0.4518	0.5151	0.8362	0.8118	0.8296	0.8353	0.9398	0.9162	0.9062	0.9166	0.9308	0.9466	0.9848	3.717e-05
GO:0009887_organ_morphogenesis	6.519e-05	0.0001158	0.01793	0.004599	0.007156	0.0002025	0.0004274	0.04978	0.003328	0.1164	0.1751	0.4431	0.4568	0.09494	0.173	0.2105	0.287	0.4499	0.4758	0.5944	0.6131	0.544	0.5333	0.413	0.5271	0.5249	0.7569	0.847	0.7707	0.8279	0.8095	0.9398	0.8982	0.9062	0.9261	0.9457	0.911	0.9848	3.717e-05
GO:0009653_anatomical_structure_morphogenesis	6.519e-05	0.0001158	0.004284	0.000197	0.006558	0.0002025	0.0004274	0.01042	0.0009257	0.09612	0.08703	0.3647	0.4729	0.0438	0.06188	0.1724	0.3351	0.4353	0.5372	0.6453	0.6131	0.6307	0.5471	0.5102	0.5865	0.5065	0.6822	0.8399	0.8144	0.8541	0.8509	0.9514	0.9164	0.9062	0.9261	0.9457	0.9466	0.9848	3.717e-05
GO:0030182_neuron_differentiation	6.519e-05	0.0001158	0.1376	0.000197	0.01874	0.0002025	0.02271	0.02758	0.0168	0.07067	0.103	0.2982	0.4504	0.1193	0.1322	0.5562	0.3395	0.5459	0.5125	0.492	0.5864	0.648	0.5333	0.5373	0.5405	0.5996	0.5056	0.8399	0.7808	0.8279	0.7687	0.9322	0.9029	0.9005	0.9227	0.9245	0.9286	0.9848	3.717e-05
GO:0050919_negative_chemotaxis	0.1015	0.1245	0.06686	0.07903	0.2086	0.02216	0.04113	0.4017	0.3524	0.1977	0.4083	0.5092	0.4487	0.1157	0.05657	0.1359	0.1591	0.3344	0.4758	0.5471	0.5634	0.4325	0.5338	0.5106	0.607	0.431	0.4663	0.2453	0.6201	0.6735	0.6572	0.6331	0.6754	0.6694	0.7287	0.872	0.8594	0.9848	0.0924
GO:0021680_cerebellar_Purkinje_cell_layer_development	0.1824	0.02032	0.04457	0.0252	0.04031	0.00397	0.0223	0.4926	0.3418	0.1872	0.3637	0.6346	0.4745	0.02185	0.05101	0.07298	0.1034	0.4016	0.3039	0.583	0.6131	0.4422	0.5654	0.379	0.528	0.4459	0.5494	0.3165	0.5424	0.6735	0.6913	0.6349	0.6352	0.7153	0.747	0.8962	0.7909	0.9848	0.004526
GO:0021702_cerebellar_Purkinje_cell_differentiation	0.2236	0.0607	0.05699	0.06552	0.06923	0.009124	0.02971	0.5444	0.4363	0.309	0.4747	0.6682	0.5379	0.0438	0.08742	0.1182	0.1072	0.4783	0.3518	0.5944	0.7083	0.4442	0.5831	0.379	0.5345	0.5065	0.6537	0.2453	0.5801	0.6848	0.7496	0.6614	0.6352	0.732	0.8372	0.9206	0.8035	0.9848	0.01872
GO:0021694_cerebellar_Purkinje_cell_layer_formation	0.2236	0.0607	0.05699	0.06552	0.06923	0.009124	0.02971	0.5444	0.4363	0.309	0.4747	0.6682	0.5379	0.0438	0.08742	0.1182	0.1072	0.4783	0.3518	0.5944	0.7083	0.4442	0.5831	0.379	0.5345	0.5065	0.6537	0.2453	0.5801	0.6848	0.7496	0.6614	0.6352	0.732	0.8372	0.9206	0.8035	0.9848	0.01872
GO:0021692_cerebellar_Purkinje_cell_layer_morphogenesis	0.2236	0.0607	0.05699	0.06552	0.06923	0.009124	0.02971	0.5444	0.4363	0.309	0.4747	0.6682	0.5379	0.0438	0.08742	0.1182	0.1072	0.4783	0.3518	0.5944	0.7083	0.4442	0.5831	0.379	0.5345	0.5065	0.6537	0.2453	0.5801	0.6848	0.7496	0.6614	0.6352	0.732	0.8372	0.9206	0.8035	0.9848	0.01872
GO:0021697_cerebellar_cortex_formation	0.105	0.03069	0.142	0.03315	0.08704	0.01451	0.02845	0.5326	0.4322	0.2709	0.4617	0.6525	0.5848	0.06941	0.1322	0.2377	0.2229	0.56	0.4758	0.5471	0.6982	0.544	0.6196	0.4935	0.5606	0.5491	0.7036	0.487	0.5917	0.6865	0.7965	0.8087	0.7001	0.8144	0.8908	0.9277	0.8505	0.9848	0.004061
GO:0048592_eye_morphogenesis	0.01189	0.00839	0.08015	0.04795	0.1324	0.001506	0.01395	0.4191	0.3418	0.2961	0.4974	0.5841	0.4484	0.04151	0.09551	0.158	0.3099	0.6164	0.6325	0.5566	0.6827	0.544	0.5984	0.5106	0.6763	0.6715	0.6459	0.3868	0.7707	0.8279	0.673	0.8848	0.8472	0.7789	0.8908	0.9091	0.9099	0.9848	0.0001063
GO:0032963_collagen_metabolic_process	0.01635	0.1381	0.3419	0.151	0.2581	0.09441	0.3712	0.5082	0.4	0.1626	0.4789	0.5456	0.3693	0.1761	0.1035	0.5921	0.2404	0.1961	0.4758	0.5349	0.6014	0.4442	0.6368	0.5373	0.7152	0.3336	0.5151	0.3546	0.6038	0.6848	0.6697	0.6331	0.6542	0.6492	0.7074	0.8962	0.8594	0.9848	0.04176
GO:0044259_multicellular_organismal_macromolecule_metabolic_process	0.02782	0.2067	0.4039	0.2004	0.4005	0.1604	0.3506	0.5326	0.4598	0.244	0.5314	0.5841	0.4484	0.3276	0.1395	0.6581	0.3035	0.3052	0.5161	0.6415	0.6457	0.4718	0.6925	0.5898	0.7159	0.431	0.5877	0.4155	0.6749	0.7432	0.7496	0.6331	0.6924	0.6694	0.8407	0.8962	0.9099	0.9848	0.05369
GO:0007626_locomotory_behavior	0.0063	0.1365	0.2088	0.05405	0.03953	0.006365	0.2872	0.5444	0.4409	0.3549	0.6186	0.6525	0.6477	0.1583	0.236	0.5572	0.2971	0.3684	0.4758	0.6098	0.6982	0.5117	0.71	0.6665	0.7385	0.3476	0.6456	0.585	0.6246	0.7545	0.7381	0.6614	0.8472	0.7315	0.8416	0.9277	0.9446	0.9848	0.008472
GO:0045595_regulation_of_cell_differentiation	6.519e-05	0.0001158	0.006187	0.0144	0.02747	0.0004609	0.001402	0.03105	0.04292	0.02736	0.2011	0.2814	0.4504	0.05839	0.06527	0.07298	0.5748	0.6481	0.7518	0.6382	0.7498	0.6719	0.6455	0.7037	0.628	0.7996	0.7644	0.7124	0.8144	0.8279	0.877	0.9514	0.9029	0.9005	0.9261	0.9245	0.9142	0.9848	3.717e-05
GO:0009890_negative_regulation_of_biosynthetic_process	0.00557	0.0003799	0.002341	0.0618	0.1076	0.006957	0.01159	0.03105	0.09529	0.1369	0.1514	0.2201	0.3693	0.1441	0.2416	0.3457	0.5748	0.6453	0.6706	0.5756	0.6933	0.648	0.5333	0.5976	0.5865	0.7856	0.7569	0.7519	0.7707	0.6764	0.7304	0.9063	0.8472	0.7996	0.8407	0.8444	0.8345	0.9848	3.717e-05
GO:0031327_negative_regulation_of_cellular_biosynthetic_process	0.007493	0.0008991	0.002033	0.064	0.1076	0.005363	0.007451	0.03764	0.1016	0.1349	0.1738	0.2673	0.3964	0.1398	0.2473	0.3045	0.5771	0.6481	0.6881	0.5858	0.7078	0.6719	0.5333	0.6066	0.5886	0.7968	0.7748	0.7519	0.7707	0.6835	0.7496	0.9183	0.854	0.8222	0.8586	0.8668	0.8505	0.9848	3.717e-05
GO:0010558_negative_regulation_of_macromolecule_biosynthetic_process	0.02218	0.001823	0.002557	0.1003	0.191	0.01443	0.01555	0.04158	0.1335	0.1845	0.2344	0.2909	0.4504	0.2415	0.3604	0.324	0.6423	0.7134	0.7518	0.6415	0.7218	0.739	0.5494	0.684	0.6571	0.8106	0.8018	0.7668	0.7925	0.7012	0.7784	0.9375	0.8963	0.8424	0.8666	0.872	0.8505	0.9848	3.717e-05
GO:0009790_embryonic_development	6.519e-05	0.0001158	0.1039	0.02692	0.03646	0.005092	0.09868	0.009015	0.007329	0.1349	0.05693	0.1782	0.4595	0.1614	0.4323	0.6297	0.5058	0.6029	0.6295	0.7368	0.5844	0.6699	0.5333	0.5106	0.536	0.6728	0.7261	0.8868	0.6983	0.8158	0.7922	0.9514	0.9029	0.9005	0.9052	0.8962	0.9166	0.9848	3.717e-05
GO:0010975_regulation_of_neuron_projection_development	0.001996	0.002438	0.1051	0.03456	0.05913	0.01307	0.08684	0.1313	0.1393	0.1248	0.2584	0.402	0.4504	0.05341	0.06903	0.5562	0.3983	0.4783	0.5054	0.4636	0.6457	0.5246	0.5471	0.5898	0.607	0.5376	0.5494	0.8236	0.6749	0.6764	0.8175	0.8544	0.8568	0.7667	0.8461	0.8633	0.8863	0.9848	3.717e-05
GO:0050770_regulation_of_axonogenesis	0.001361	0.004871	0.1051	0.01298	0.1076	0.0135	0.04752	0.2333	0.2076	0.1179	0.3475	0.492	0.4595	0.0712	0.09612	0.5405	0.4277	0.4783	0.5528	0.4792	0.7121	0.5246	0.6291	0.6284	0.6818	0.615	0.538	0.7668	0.6983	0.7404	0.8509	0.8583	0.8963	0.7789	0.8739	0.9277	0.9286	0.9848	3.717e-05
GO:0031344_regulation_of_cell_projection_organization	0.00366	0.003141	0.1102	0.06678	0.03501	0.01353	0.1899	0.2299	0.1636	0.157	0.3003	0.4572	0.5228	0.0495	0.05101	0.595	0.3994	0.4783	0.6397	0.5448	0.7083	0.544	0.6368	0.7036	0.7152	0.6234	0.6552	0.7538	0.7707	0.6848	0.8509	0.8848	0.8982	0.7787	0.8908	0.8962	0.9067	0.9848	0.0001063
GO:0048519_negative_regulation_of_biological_process	6.519e-05	0.0003019	0.01869	0.04356	0.00442	0.000798	0.007451	0.1757	0.1145	0.2709	0.3637	0.5092	0.5539	0.06417	0.07801	0.3704	0.3395	0.4016	0.543	0.7368	0.7378	0.544	0.5895	0.6587	0.6763	0.6234	0.7444	0.7332	0.7707	0.7626	0.8509	0.93	0.8982	0.864	0.9007	0.9277	0.9446	0.9848	3.717e-05
GO:0048523_negative_regulation_of_cellular_process	6.519e-05	0.0001158	0.05915	0.04239	0.006558	0.005363	0.02971	0.09733	0.07832	0.3039	0.2635	0.4551	0.5539	0.1134	0.2241	0.6569	0.3983	0.4742	0.5125	0.719	0.7201	0.6223	0.5338	0.6	0.607	0.699	0.7261	0.8362	0.7707	0.7432	0.8509	0.9375	0.8982	0.8862	0.9015	0.8962	0.9099	0.9848	3.717e-05
GO:0006355_regulation_of_transcription,_DNA-dependent	6.519e-05	0.0003019	0.007109	0.00939	0.02245	0.0004609	0.01024	0.1855	0.1817	0.2506	0.2452	0.5681	0.4504	0.04151	0.2704	0.5448	0.5748	0.6035	0.6791	0.5897	0.7498	0.6074	0.5634	0.5771	0.7164	0.7363	0.7615	0.6673	0.8381	0.8279	0.8257	0.9375	0.9008	0.9005	0.9019	0.9308	0.9466	0.9848	3.717e-05
GO:0051093_negative_regulation_of_developmental_process	0.0008674	0.004919	0.09281	0.05611	0.05803	0.007145	0.144	0.1971	0.1342	0.1349	0.4644	0.4551	0.6118	0.1728	0.1322	0.5201	0.4039	0.4783	0.6462	0.7759	0.7378	0.647	0.6725	0.6831	0.6571	0.6253	0.6833	0.7124	0.8144	0.8381	0.8986	0.9375	0.8982	0.9005	0.9261	0.9277	0.9446	0.9848	3.717e-05
GO:0050793_regulation_of_developmental_process	6.519e-05	0.0003019	0.02542	0.02701	0.02968	0.009124	0.07305	0.143	0.07832	0.09032	0.3563	0.4958	0.5539	0.2479	0.08742	0.5831	0.53	0.4783	0.777	0.7853	0.7498	0.6699	0.7024	0.7337	0.7154	0.7224	0.6923	0.7488	0.8381	0.8279	0.8959	0.9398	0.9029	0.9005	0.9261	0.9457	0.9446	0.9848	3.717e-05
GO:0045596_negative_regulation_of_cell_differentiation	6.519e-05	0.001823	0.1194	0.05306	0.07439	0.009824	0.1696	0.1757	0.1097	0.1589	0.3952	0.4551	0.5539	0.1583	0.2416	0.3366	0.5748	0.6481	0.777	0.7837	0.7498	0.7078	0.675	0.7037	0.6521	0.7274	0.8229	0.7519	0.8144	0.8279	0.8543	0.9398	0.9029	0.9005	0.9227	0.8962	0.884	0.9848	3.717e-05
GO:0051252_regulation_of_RNA_metabolic_process	0.0002757	0.0002254	0.001211	0.004931	0.003367	0.0002025	0.004284	0.3176	0.2993	0.1845	0.3003	0.6189	0.4504	0.02081	0.0548	0.2014	0.4332	0.4783	0.6089	0.554	0.7739	0.5208	0.6062	0.5838	0.7154	0.6728	0.7569	0.455	0.8144	0.8332	0.8257	0.8948	0.8982	0.8862	0.9166	0.9457	0.9466	0.9848	3.717e-05
GO:0050794_regulation_of_cellular_process	6.519e-05	0.0003799	0.00232	0.000197	0.0003536	0.0002025	0.001402	0.2877	0.1393	0.1101	0.4083	0.6336	0.5233	0.02089	0.041	0.212	0.3377	0.3684	0.6397	0.5495	0.7979	0.5246	0.723	0.7337	0.7837	0.615	0.7261	0.5605	0.8381	0.8456	0.8509	0.8848	0.9164	0.9062	0.9261	0.9504	0.957	0.9848	3.717e-05
GO:0001501_skeletal_system_development	6.519e-05	0.0001158	0.0007734	0.005161	0.01566	0.0002025	0.0004274	0.167	0.1348	0.02462	0.304	0.4989	0.4504	0.02225	0.03183	0.01655	0.5162	0.4783	0.7649	0.5784	0.793	0.7388	0.7624	0.7068	0.7613	0.7074	0.7118	0.5601	0.8381	0.8712	0.8543	0.9489	0.9164	0.9005	0.9052	0.9483	0.9489	0.9848	3.717e-05
GO:0048705_skeletal_system_morphogenesis	6.519e-05	0.005521	0.004152	0.03227	0.06059	0.000798	0.001653	0.2877	0.1475	0.1179	0.4083	0.5499	0.5379	0.09494	0.07801	0.2377	0.6006	0.4107	0.7745	0.5471	0.7498	0.647	0.7168	0.7068	0.745	0.5724	0.6456	0.6192	0.8381	0.8524	0.8728	0.9112	0.9029	0.9005	0.8988	0.9457	0.9466	0.9848	3.717e-05
GO:0048706_embryonic_skeletal_system_development	0.0002757	0.008389	0.007109	0.117	0.09222	0.001828	0.005862	0.3956	0.2474	0.1697	0.4644	0.5886	0.5539	0.0913	0.06231	0.1622	0.5748	0.5106	0.7854	0.5471	0.793	0.648	0.7469	0.7553	0.7606	0.6912	0.7622	0.5779	0.8314	0.8611	0.8959	0.9398	0.9164	0.9005	0.9222	0.9481	0.9482	0.9848	3.717e-05
GO:0048870_cell_motility	6.519e-05	0.005745	0.1294	0.03456	0.1379	0.02539	0.01395	0.3176	0.2785	0.1349	0.4747	0.53	0.5228	0.4265	0.3455	0.2779	0.5553	0.5739	0.6295	0.5994	0.7059	0.647	0.6368	0.6339	0.6903	0.5336	0.7444	0.7519	0.7707	0.7432	0.6913	0.8848	0.8982	0.8546	0.9015	0.9277	0.9446	0.9848	3.717e-05
GO:0030198_extracellular_matrix_organization	0.03361	0.1405	0.108	0.2622	0.1321	0.06154	0.09521	0.351	0.2762	0.2267	0.5335	0.5365	0.5973	0.2834	0.2991	0.2271	0.5656	0.4284	0.6544	0.7401	0.7064	0.648	0.6932	0.6976	0.7221	0.4313	0.662	0.6673	0.7742	0.7599	0.7965	0.8544	0.8982	0.8104	0.8447	0.9277	0.9446	0.9848	0.006499
GO:0045666_positive_regulation_of_neuron_differentiation	0.0005334	0.1789	0.009281	0.03208	0.2525	0.00397	0.01507	0.4765	0.4574	0.5636	0.5585	0.5961	0.6483	0.1728	0.1235	0.0368	0.4978	0.4955	0.6706	0.7853	0.7556	0.7152	0.723	0.7037	0.759	0.6253	0.5877	0.3257	0.8027	0.8611	0.8509	0.9063	0.8982	0.9005	0.9227	0.9457	0.9446	0.9848	0.000136
GO:0051239_regulation_of_multicellular_organismal_process	6.519e-05	0.003262	0.004013	0.02786	0.06919	0.0002025	0.0004274	0.3321	0.2029	0.1104	0.613	0.6403	0.7172	0.1848	0.1046	0.02571	0.6378	0.4797	0.7696	0.7853	0.8237	0.7721	0.8045	0.7733	0.7848	0.7224	0.7896	0.5114	0.8623	0.8611	0.9315	0.9514	0.9165	0.9062	0.9298	0.9504	0.958	0.9848	3.717e-05
GO:0021695_cerebellar_cortex_development	0.04132	0.04112	0.08142	0.0467	0.1608	0.064	0.04819	0.5326	0.4409	0.3497	0.5013	0.6193	0.6388	0.2159	0.2824	0.3366	0.4039	0.6187	0.501	0.6142	0.7208	0.648	0.6759	0.6284	0.6571	0.6243	0.7569	0.7348	0.6213	0.7545	0.8509	0.8948	0.8472	0.8528	0.9015	0.9457	0.8864	0.9848	0.0008253
GO:0021548_pons_development	0.03216	0.1332	0.3381	0.1638	0.1945	0.06457	0.298	0.5353	0.4572	0.4762	0.5178	0.6572	0.67	0.2649	0.4084	0.4032	0.53	0.5499	0.6791	0.7671	0.6845	0.6699	0.6368	0.6856	0.7152	0.5557	0.6993	0.8113	0.7707	0.8341	0.8229	0.8848	0.8851	0.845	0.8908	0.9277	0.9323	0.9848	0.03365
GO:0014050_negative_regulation_of_glutamate_secretion	0.04772	0.1244	0.307	0.2568	0.3153	0.1251	0.1961	0.5326	0.5435	0.3769	0.479	0.7178	0.6483	0.2288	0.4227	0.5405	0.4083	0.6851	0.6706	0.778	0.7603	0.6778	0.71	0.7036	0.7152	0.7166	0.7845	0.7519	0.7707	0.7599	0.8301	0.8764	0.8472	0.8546	0.8988	0.9277	0.9067	0.9848	0.007809
GO:0051100_negative_regulation_of_binding	0.0537	0.08676	0.1472	0.2032	0.1013	0.02063	0.1119	0.5347	0.484	0.4959	0.5725	0.6682	0.6612	0.08442	0.2692	0.4498	0.287	0.4783	0.579	0.7853	0.7378	0.6361	0.675	0.6988	0.7154	0.4052	0.7036	0.7538	0.7707	0.8456	0.8509	0.8544	0.854	0.8868	0.8988	0.9457	0.9466	0.9848	0.02949
GO:0043392_negative_regulation_of_DNA_binding	0.03805	0.2026	0.2006	0.2482	0.1479	0.05262	0.1249	0.6109	0.5565	0.577	0.6682	0.7178	0.7071	0.1801	0.3691	0.4719	0.3788	0.5834	0.6736	0.8211	0.793	0.6623	0.7319	0.7234	0.7508	0.4826	0.7954	0.8048	0.8144	0.8611	0.8664	0.8948	0.8982	0.9005	0.9015	0.9457	0.9466	0.9848	0.03225
GO:0021953_central_nervous_system_neuron_differentiation	0.01134	0.07586	0.09413	0.06718	0.2706	0.1251	0.1975	0.5082	0.4875	0.3549	0.6197	0.6189	0.6612	0.4135	0.381	0.4121	0.4978	0.6584	0.7334	0.7112	0.7059	0.648	0.7168	0.7037	0.7222	0.6912	0.8081	0.6143	0.7742	0.8294	0.7771	0.8368	0.8963	0.8528	0.8988	0.9245	0.9008	0.9848	0.01361
GO:0021954_central_nervous_system_neuron_development	0.01877	0.1074	0.05945	0.1625	0.2946	0.05746	0.1612	0.5212	0.5229	0.3549	0.6531	0.6189	0.6859	0.417	0.3019	0.324	0.5748	0.6481	0.7537	0.7401	0.7201	0.648	0.7319	0.7421	0.7438	0.7074	0.8317	0.54	0.7981	0.8279	0.7965	0.8097	0.8982	0.8309	0.9015	0.9277	0.9139	0.9848	0.02244
GO:0043586_tongue_development	0.03216	0.2094	0.1869	0.1944	0.2086	0.03756	0.08301	0.5082	0.4894	0.431	0.5163	0.6525	0.6483	0.2305	0.379	0.3314	0.4615	0.7423	0.7085	0.7865	0.7754	0.6866	0.7412	0.6474	0.7164	0.7903	0.7896	0.6192	0.7925	0.8279	0.8509	0.9063	0.8982	0.9005	0.9261	0.9245	0.9286	0.9848	0.005429
GO:0048536_spleen_development	0.06612	0.1656	0.1164	0.07932	0.3025	0.04838	0.1696	0.5524	0.5282	0.5485	0.6511	0.6525	0.6456	0.3592	0.2618	0.212	0.5736	0.7134	0.7155	0.7368	0.793	0.648	0.7502	0.7037	0.7673	0.7224	0.8004	0.6192	0.8144	0.8524	0.8509	0.8948	0.9019	0.8862	0.9261	0.9457	0.9466	0.9848	0.01598
GO:0001708_cell_fate_specification	0.006639	0.005291	0.07282	0.03647	0.4162	0.04491	0.2019	0.4822	0.4361	0.1901	0.5815	0.602	0.6904	0.3365	0.4132	0.3492	0.6979	0.746	0.777	0.7133	0.7979	0.8086	0.7605	0.7628	0.754	0.8106	0.8449	0.6143	0.8377	0.8611	0.908	0.9398	0.9029	0.9062	0.9286	0.9457	0.9446	0.9848	3.717e-05
GO:0048704_embryonic_skeletal_system_morphogenesis	0.003337	0.06251	0.04522	0.325	0.3304	0.02492	0.05894	0.5082	0.3349	0.3549	0.5585	0.6525	0.7013	0.3219	0.3423	0.4153	0.7196	0.6481	0.7892	0.733	0.7979	0.7779	0.7766	0.7554	0.7906	0.725	0.7744	0.763	0.8394	0.8775	0.908	0.9514	0.9164	0.9062	0.9286	0.9483	0.9482	0.9848	3.717e-05
GO:0008284_positive_regulation_of_cell_proliferation	0.0003286	0.03069	0.2195	0.1107	0.2581	0.02236	0.1592	0.5212	0.4574	0.448	0.6081	0.6189	0.7256	0.4722	0.4941	0.3314	0.6816	0.7066	0.6881	0.7227	0.793	0.7906	0.71	0.719	0.7513	0.8096	0.7954	0.7956	0.8144	0.8453	0.8959	0.9398	0.9029	0.9062	0.9261	0.9457	0.9466	0.9848	3.717e-05
GO:0048663_neuron_fate_commitment	0.003812	0.01535	0.3277	0.1944	0.4463	0.05241	0.1746	0.4593	0.4409	0.4639	0.6531	0.5456	0.7864	0.4722	0.6262	0.5408	0.6951	0.7694	0.7867	0.7853	0.7979	0.8532	0.7752	0.7554	0.75	0.8285	0.8449	0.847	0.8381	0.8611	0.908	0.9514	0.9029	0.9062	0.9298	0.9457	0.9466	0.9848	3.717e-05
GO:0021587_cerebellum_morphogenesis	0.0267	0.1887	0.106	0.2004	0.3749	0.1242	0.09868	0.6921	0.5932	0.664	0.7352	0.7178	0.7604	0.4572	0.4474	0.4223	0.5748	0.7351	0.7473	0.7263	0.8185	0.7869	0.7812	0.7553	0.7606	0.7786	0.8449	0.7065	0.8144	0.8611	0.905	0.9398	0.9029	0.9062	0.9286	0.9483	0.9466	0.9848	0.008738
GO:0014048_regulation_of_glutamate_secretion	0.05877	0.2027	0.06928	0.4067	0.4317	0.04164	0.1144	0.6639	0.6431	0.5969	0.742	0.7471	0.7869	0.455	0.6286	0.1545	0.5748	0.7659	0.7334	0.8592	0.8181	0.8224	0.8045	0.7513	0.7837	0.8096	0.8449	0.7727	0.8027	0.8611	0.908	0.9398	0.9029	0.9062	0.9285	0.9457	0.9466	0.9848	0.004518
GO:0002376_immune_system_process	0.4676	0.5393	0.2044	0.0903	0.05087	0.001018	0.05665	0.8088	0.771	0.63	0.7502	0.8374	0.7256	0.06327	0.1429	0.1066	0.2342	0.6232	0.5125	0.8002	0.8357	0.648	0.8111	0.7036	0.7765	0.6207	0.8317	0.487	0.7707	0.8772	0.8509	0.8674	0.8472	0.8352	0.9261	0.9504	0.9466	0.9848	0.02396
GO:0032501_multicellular_organismal_process	6.519e-05	0.01374	0.0007734	0.007626	0.0003536	0.0002025	0.0004274	0.7778	0.6821	0.3727	0.8494	0.8946	0.8426	0.003585	0.01778	0.002317	0.5748	0.7659	0.8147	0.8811	0.915	0.8615	0.9096	0.8332	0.91	0.8096	0.8935	0.3542	0.9296	0.9521	0.9537	0.9591	0.9686	0.941	0.9709	0.986	0.9736	0.9848	3.717e-05
GO:0022610_biological_adhesion	0.0002757	0.4093	0.01083	0.224	0.08122	0.0004609	0.009688	0.763	0.7009	0.6729	0.8324	0.824	0.8164	0.06616	0.1322	0.1852	0.4893	0.6481	0.7745	0.9004	0.8392	0.8254	0.8707	0.7807	0.8458	0.7166	0.8629	0.7339	0.8635	0.9159	0.9315	0.9514	0.9165	0.9062	0.9298	0.9793	0.9736	0.9848	0.001759
GO:0007155_cell_adhesion	0.0002757	0.4217	0.01136	0.2482	0.08433	0.0004609	0.009574	0.7702	0.7102	0.6756	0.8361	0.8314	0.8164	0.07072	0.1388	0.1791	0.5089	0.6754	0.7789	0.9004	0.8446	0.8371	0.8707	0.7895	0.8462	0.7224	0.8629	0.7439	0.8635	0.9201	0.9315	0.9514	0.9179	0.9062	0.9348	0.9845	0.9736	0.9848	0.00208
GO:0010769_regulation_of_cell_morphogenesis_involved_in_differentiation	0.002709	0.00408	0.07121	0.1629	0.1383	0.07606	0.125	0.1815	0.1929	0.1417	0.3637	0.4551	0.5347	0.2288	0.3362	0.5988	0.5981	0.7077	0.7151	0.562	0.7556	0.647	0.6058	0.6846	0.6818	0.7903	0.7748	0.847	0.7925	0.6652	0.8509	0.9233	0.8982	0.8862	0.9015	0.8633	0.9008	0.9848	0.0001063
GO:0045168_cell-cell_signaling_involved_in_cell_fate_specification	0.02783	0.01441	0.1465	0.04702	0.2433	0.1319	0.2468	0.3013	0.3041	0.09575	0.3907	0.4572	0.5043	0.4498	0.3959	0.5405	0.6169	0.6481	0.7085	0.4035	0.6492	0.6699	0.6368	0.7036	0.6763	0.7154	0.7444	0.7439	0.7797	0.6848	0.8175	0.8544	0.8736	0.8546	0.8988	0.8738	0.8594	0.9848	3.717e-05
GO:0031128_developmental_induction	0.02783	0.01441	0.1465	0.04702	0.2433	0.1319	0.2468	0.3013	0.3041	0.09575	0.3907	0.4572	0.5043	0.4498	0.3959	0.5405	0.6169	0.6481	0.7085	0.4035	0.6492	0.6699	0.6368	0.7036	0.6763	0.7154	0.7444	0.7439	0.7797	0.6848	0.8175	0.8544	0.8736	0.8546	0.8988	0.8738	0.8594	0.9848	3.717e-05
GO:0060350_endochondral_bone_morphogenesis	0.02221	0.01358	0.1906	0.2153	0.3421	0.05686	0.06391	0.1906	0.2678	0.2452	0.4083	0.4301	0.5539	0.5597	0.5188	0.5562	0.7603	0.4955	0.7816	0.645	0.6457	0.744	0.6291	0.7037	0.7056	0.6165	0.6021	0.7791	0.8144	0.7545	0.8509	0.9063	0.8982	0.8546	0.8667	0.8962	0.9446	0.9848	0.0008133
GO:0007409_axonogenesis	6.519e-05	0.0001158	0.4039	0.007023	0.2074	0.02236	0.3463	0.1257	0.08303	0.176	0.3008	0.465	0.5379	0.4009	0.2604	0.78	0.6002	0.6164	0.7473	0.5471	0.6218	0.7492	0.6117	0.7037	0.7154	0.7147	0.6034	0.8362	0.8381	0.8279	0.8353	0.9312	0.9029	0.8862	0.9015	0.9245	0.9466	0.9848	3.717e-05
GO:0032989_cellular_component_morphogenesis	6.519e-05	0.0008991	0.3168	0.01723	0.2945	0.05262	0.3811	0.09659	0.05657	0.2602	0.2323	0.451	0.4745	0.4722	0.2959	0.6739	0.6291	0.6232	0.7403	0.5471	0.5699	0.7176	0.5333	0.684	0.6763	0.6912	0.7108	0.8362	0.8027	0.8279	0.7687	0.9375	0.9029	0.8988	0.8474	0.8962	0.9352	0.9848	3.717e-05
GO:0000902_cell_morphogenesis	6.519e-05	0.001639	0.3554	0.01075	0.3197	0.06639	0.444	0.1335	0.06893	0.2452	0.2698	0.4551	0.5165	0.5097	0.3523	0.7326	0.6947	0.6481	0.7473	0.5276	0.5844	0.7388	0.5471	0.7068	0.7152	0.7166	0.7485	0.8302	0.8144	0.8279	0.7889	0.9375	0.9029	0.9005	0.8973	0.8962	0.9446	0.9848	3.717e-05
GO:0048593_camera-type_eye_morphogenesis	0.003937	0.021	0.5198	0.2073	0.4064	0.02539	0.1993	0.3335	0.2876	0.3698	0.479	0.5606	0.4876	0.2479	0.4622	0.5806	0.5259	0.6481	0.7416	0.7355	0.6131	0.739	0.5984	0.5976	0.6818	0.6715	0.6833	0.8113	0.7707	0.8453	0.7149	0.9306	0.8513	0.8528	0.8917	0.8962	0.9008	0.9848	0.002019
GO:0008045_motor_axon_guidance	0.01134	0.05546	0.3499	0.3418	0.3581	0.1835	0.3025	0.5212	0.4276	0.2919	0.5288	0.6018	0.6118	0.4498	0.2835	0.5806	0.3737	0.6481	0.6683	0.5944	0.7378	0.6778	0.7292	0.6831	0.6492	0.7224	0.8018	0.7219	0.7707	0.6848	0.8223	0.8948	0.8316	0.8546	0.9052	0.8962	0.8594	0.9848	0.01307
GO:0048168_regulation_of_neuronal_synaptic_plasticity	0.02589	0.1777	0.5988	0.4494	0.254	0.1326	0.2144	0.4715	0.2399	0.4533	0.5414	0.621	0.6208	0.4984	0.2963	0.7337	0.5692	0.4955	0.6056	0.7368	0.6827	0.648	0.6455	0.6284	0.628	0.5065	0.7936	0.8362	0.7222	0.8279	0.8292	0.8948	0.8304	0.8528	0.8988	0.9245	0.8594	0.9848	0.001759
GO:0050768_negative_regulation_of_neurogenesis	0.004621	0.1344	0.4611	0.1944	0.1802	0.1348	0.5823	0.3305	0.2785	0.3796	0.5181	0.5048	0.5845	0.4703	0.4132	0.6846	0.6378	0.6481	0.7518	0.7853	0.7116	0.775	0.675	0.719	0.6818	0.7224	0.7569	0.847	0.7925	0.7432	0.8509	0.9063	0.8982	0.8777	0.9015	0.8962	0.8594	0.9848	0.00128
GO:0010721_negative_regulation_of_cell_development	0.00366	0.1705	0.4554	0.318	0.3027	0.1774	0.5337	0.4232	0.3558	0.4032	0.6081	0.5723	0.6483	0.5372	0.4992	0.6581	0.6951	0.7285	0.777	0.7853	0.7556	0.8086	0.7168	0.7375	0.7154	0.7968	0.8081	0.847	0.8144	0.7562	0.8509	0.9398	0.8982	0.9005	0.9227	0.8962	0.8646	0.9848	0.001554
GO:0019800_peptide_cross-linking_via_chondroitin_4-sulfate_glycosaminoglycan	0.03179	0.1701	0.5177	0.2622	0.4162	0.1597	0.3381	0.4981	0.4574	0.3838	0.6214	0.6189	0.6483	0.4628	0.5881	0.5562	0.5754	0.6703	0.6881	0.772	0.7605	0.7721	0.723	0.695	0.7152	0.7363	0.7225	0.847	0.7707	0.8279	0.8509	0.9375	0.8982	0.864	0.9015	0.9308	0.8933	0.9848	0.0225
GO:0003002_regionalization	6.519e-05	0.0001158	0.01059	0.0512	0.1143	0.007052	0.03086	0.1757	0.1136	0.431	0.3907	0.4551	0.7172	0.2952	0.4474	0.5781	0.5771	0.719	0.7537	0.7916	0.7979	0.8137	0.7469	0.704	0.725	0.8285	0.7744	0.847	0.8252	0.8759	0.9152	0.9514	0.9164	0.9062	0.9286	0.9457	0.9466	0.9848	3.717e-05
GO:0007389_pattern_specification_process	6.519e-05	0.0001158	0.02825	0.03402	0.1481	0.01276	0.03366	0.199	0.1183	0.3699	0.442	0.4958	0.7497	0.3669	0.495	0.5921	0.6483	0.7659	0.787	0.7837	0.8181	0.8547	0.7976	0.7564	0.7816	0.8285	0.8341	0.8681	0.8407	0.8918	0.9292	0.9514	0.9165	0.9252	0.9298	0.9483	0.9489	0.9848	3.717e-05
GO:0030278_regulation_of_ossification	0.01877	0.003141	0.2761	0.2919	0.2946	0.08362	0.2917	0.1239	0.1793	0.1207	0.3003	0.5092	0.5539	0.2773	0.5972	0.6297	0.7181	0.7657	0.7725	0.7759	0.7498	0.8225	0.71	0.7337	0.7152	0.8192	0.7744	0.847	0.8381	0.8381	0.8509	0.9514	0.8982	0.9005	0.9286	0.9277	0.9446	0.9848	3.717e-05
GO:0009892_negative_regulation_of_metabolic_process	0.06271	0.004919	0.01493	0.454	0.2032	0.008911	0.02069	0.1862	0.2605	0.5081	0.3637	0.4665	0.6306	0.2505	0.4804	0.5117	0.6176	0.7659	0.7334	0.8002	0.7605	0.7779	0.5986	0.647	0.628	0.8289	0.8449	0.847	0.7707	0.8279	0.8509	0.9398	0.8513	0.8901	0.9072	0.9277	0.8594	0.9848	3.717e-05
GO:0031324_negative_regulation_of_cellular_metabolic_process	0.05217	0.005745	0.007252	0.3812	0.1763	0.01993	0.04364	0.167	0.207	0.4536	0.3432	0.4572	0.6279	0.2887	0.5592	0.5677	0.689	0.7659	0.7437	0.7759	0.7622	0.7869	0.57	0.6587	0.6204	0.8366	0.8449	0.847	0.7797	0.7932	0.8509	0.9459	0.8982	0.9005	0.9019	0.9277	0.8728	0.9848	3.717e-05
GO:0010605_negative_regulation_of_macromolecule_metabolic_process	0.1118	0.008325	0.009463	0.4893	0.2717	0.01414	0.02971	0.1603	0.2604	0.5118	0.3475	0.4551	0.5848	0.3365	0.5511	0.4855	0.7144	0.7694	0.7649	0.7962	0.7622	0.804	0.588	0.6831	0.6597	0.8696	0.8561	0.847	0.7742	0.8279	0.8509	0.9416	0.8851	0.8973	0.9031	0.8962	0.8521	0.9848	3.717e-05
GO:0045934_negative_regulation_of_nucleobase,_nucleoside,_nucleotide_and_nucleic_acid_metabolic_process	0.1446	0.01052	0.01802	0.2451	0.2945	0.04089	0.04558	0.1838	0.3128	0.309	0.3637	0.4958	0.5347	0.4832	0.4896	0.5201	0.7628	0.7845	0.7882	0.7671	0.7979	0.804	0.6291	0.7068	0.7154	0.872	0.8629	0.8362	0.8381	0.7881	0.8509	0.9514	0.8993	0.9005	0.9015	0.9229	0.9067	0.9848	3.717e-05
GO:0051172_negative_regulation_of_nitrogen_compound_metabolic_process	0.1402	0.01265	0.03217	0.2622	0.3007	0.04233	0.04903	0.1967	0.3418	0.3549	0.3959	0.5212	0.5452	0.4832	0.5218	0.5448	0.7573	0.7848	0.787	0.7837	0.7979	0.8086	0.6455	0.7068	0.7154	0.8756	0.8629	0.8399	0.8381	0.8279	0.8509	0.9514	0.8982	0.9062	0.9166	0.9277	0.9069	0.9848	3.717e-05
GO:0010629_negative_regulation_of_gene_expression	0.04307	0.01493	0.007215	0.2952	0.4005	0.02854	0.01335	0.1946	0.335	0.4001	0.4397	0.5456	0.6045	0.5517	0.5775	0.4542	0.78	0.8133	0.7904	0.8127	0.8181	0.8318	0.7168	0.7554	0.7513	0.8852	0.8646	0.847	0.8394	0.8383	0.8728	0.9514	0.9029	0.9062	0.9261	0.9277	0.926	0.9848	3.717e-05
GO:0000904_cell_morphogenesis_involved_in_differentiation	6.519e-05	0.0002254	0.5479	0.01298	0.2483	0.05037	0.4521	0.1838	0.0896	0.1957	0.3637	0.5456	0.5845	0.527	0.4059	0.7947	0.6951	0.6703	0.7649	0.5944	0.7083	0.7869	0.6368	0.7493	0.745	0.7269	0.7569	0.847	0.8381	0.8453	0.8509	0.9398	0.9164	0.9062	0.9031	0.9457	0.9466	0.9848	3.717e-05
GO:0048666_neuron_development	6.519e-05	0.0001158	0.3719	0.002611	0.2547	0.0119	0.4027	0.1761	0.1054	0.2709	0.3907	0.5606	0.6118	0.5895	0.4893	0.7755	0.7373	0.7373	0.7649	0.6253	0.7201	0.8052	0.6455	0.7379	0.725	0.7685	0.7447	0.8755	0.8406	0.8453	0.8377	0.9471	0.9164	0.9062	0.9261	0.9457	0.9466	0.9848	3.717e-05
GO:0032990_cell_part_morphogenesis	6.519e-05	0.0006501	0.3719	0.02692	0.4358	0.1087	0.5206	0.199	0.1636	0.3038	0.3637	0.4958	0.5845	0.6167	0.4746	0.7857	0.7389	0.719	0.7649	0.5756	0.6941	0.7994	0.6291	0.7234	0.7154	0.7903	0.7447	0.847	0.8381	0.8453	0.8509	0.9398	0.9029	0.9005	0.9031	0.9229	0.9446	0.9848	3.717e-05
GO:0048858_cell_projection_morphogenesis	6.519e-05	0.0003799	0.414	0.02692	0.4162	0.1006	0.5176	0.2063	0.1586	0.2747	0.4086	0.5417	0.6306	0.6001	0.4954	0.7989	0.7389	0.7285	0.7737	0.5756	0.7247	0.8052	0.6855	0.7493	0.7513	0.8012	0.7569	0.847	0.8407	0.8456	0.8664	0.9398	0.9164	0.9005	0.9226	0.9337	0.9466	0.9848	3.717e-05
GO:0048812_neuron_projection_morphogenesis	6.519e-05	0.0003019	0.4513	0.02154	0.3533	0.05976	0.4785	0.2333	0.1636	0.2734	0.4257	0.5488	0.6483	0.5696	0.4746	0.8042	0.7389	0.719	0.777	0.6253	0.7378	0.8086	0.6904	0.7511	0.759	0.7968	0.7569	0.847	0.8406	0.8456	0.8728	0.9398	0.9164	0.9062	0.9227	0.9457	0.9466	0.9848	3.717e-05
GO:0048667_cell_morphogenesis_involved_in_neuron_differentiation	6.519e-05	0.0003799	0.4554	0.02753	0.3871	0.07204	0.4706	0.2412	0.1792	0.3055	0.442	0.5681	0.6646	0.6001	0.513	0.8011	0.7628	0.7572	0.78	0.6142	0.7498	0.8225	0.7042	0.7554	0.7606	0.8096	0.7845	0.8681	0.8445	0.8456	0.877	0.9514	0.9164	0.9062	0.9261	0.9457	0.9466	0.9848	3.717e-05
GO:0007411_axon_guidance	6.519e-05	0.01297	0.3797	0.01002	0.4089	0.03913	0.2574	0.3004	0.2399	0.2787	0.4747	0.5606	0.6388	0.5141	0.4982	0.7354	0.6378	0.719	0.7649	0.7759	0.7162	0.8065	0.7165	0.7328	0.7333	0.7685	0.7569	0.847	0.8381	0.8491	0.8509	0.9385	0.9029	0.9005	0.9261	0.9393	0.9466	0.9848	3.717e-05
GO:0035295_tube_development	6.519e-05	0.001307	0.4122	0.1102	0.3421	0.1648	0.4027	0.1761	0.1136	0.2103	0.479	0.402	0.6569	0.6069	0.6551	0.6581	0.7237	0.7635	0.7473	0.7245	0.7378	0.8086	0.71	0.7036	0.6903	0.7968	0.8561	0.8815	0.8144	0.8279	0.8959	0.9514	0.9029	0.9062	0.9286	0.9308	0.9446	0.9848	3.717e-05
GO:0031175_neuron_projection_development	6.519e-05	0.0003019	0.4977	0.04183	0.4741	0.1097	0.6073	0.2759	0.2108	0.4033	0.4397	0.6189	0.7071	0.6995	0.6612	0.8417	0.7975	0.7815	0.787	0.7202	0.7498	0.8486	0.689	0.7733	0.7513	0.8285	0.8286	0.8927	0.844	0.8611	0.877	0.9514	0.9164	0.9062	0.9286	0.9457	0.9466	0.9848	3.717e-05
GO:0032879_regulation_of_localization	6.519e-05	0.01574	0.5198	0.1358	0.1341	0.1775	0.4798	0.4453	0.1295	0.4032	0.5523	0.6525	0.7172	0.6462	0.7065	0.7811	0.5748	0.7066	0.5703	0.7133	0.7642	0.6699	0.6875	0.5773	0.6474	0.7147	0.8449	0.8968	0.7742	0.8453	0.877	0.9398	0.8982	0.9062	0.9286	0.9457	0.9067	0.9848	3.717e-05
GO:0065008_regulation_of_biological_quality	0.0002757	0.04711	0.7517	0.3498	0.1639	0.2774	0.6274	0.4323	0.3128	0.5919	0.4972	0.6458	0.7172	0.6127	0.6332	0.7916	0.7271	0.6828	0.6544	0.7865	0.7116	0.7906	0.5831	0.5498	0.5886	0.6329	0.8317	0.9156	0.7547	0.8453	0.8509	0.9398	0.8982	0.9005	0.9166	0.9277	0.8863	0.9848	3.717e-05
GO:0051049_regulation_of_transport	6.519e-05	0.1406	0.5905	0.308	0.1341	0.2687	0.6065	0.5287	0.2815	0.577	0.6531	0.6945	0.7545	0.6069	0.7472	0.8405	0.6423	0.7134	0.5372	0.7853	0.7979	0.739	0.73	0.6066	0.7152	0.6728	0.8305	0.8977	0.7742	0.8456	0.905	0.9398	0.8982	0.9062	0.9286	0.9457	0.9286	0.9848	3.717e-05
GO:0031103_axon_regeneration	0.0153	0.05096	0.6762	0.1003	0.254	0.2189	0.5951	0.5212	0.4335	0.5868	0.4974	0.6374	0.7158	0.5752	0.5484	0.6888	0.7726	0.6703	0.7793	0.7133	0.7378	0.7631	0.675	0.7554	0.7164	0.7154	0.7569	0.8868	0.8027	0.8453	0.8509	0.9375	0.9029	0.9005	0.9009	0.9308	0.9446	0.9848	0.004857
GO:0031102_neuron_projection_regeneration	0.007313	0.0437	0.6008	0.142	0.3119	0.4006	0.6065	0.4354	0.3832	0.4564	0.4684	0.5978	0.67	0.7015	0.6512	0.7073	0.7975	0.7285	0.787	0.706	0.7378	0.7721	0.6456	0.7554	0.7154	0.7545	0.7845	0.8968	0.8144	0.8453	0.8509	0.9398	0.9029	0.9005	0.9015	0.9287	0.9446	0.9848	0.001023
GO:0021700_developmental_maturation	0.0307	0.1663	0.4402	0.2622	0.3167	0.4473	0.4908	0.4926	0.3759	0.5636	0.5418	0.6572	0.7545	0.5611	0.72	0.7129	0.7795	0.7337	0.7725	0.7888	0.7642	0.8114	0.6514	0.7493	0.7152	0.7363	0.7954	0.8681	0.8135	0.8453	0.8308	0.9398	0.9029	0.9005	0.9222	0.9457	0.9446	0.9848	0.001478
GO:0009952_anterior/posterior_pattern_formation	6.519e-05	0.0008991	0.0583	0.09838	0.2946	0.07204	0.125	0.2735	0.2604	0.5881	0.4542	0.5977	0.7509	0.4984	0.5218	0.6749	0.7271	0.7694	0.7892	0.8127	0.8246	0.8486	0.7915	0.7554	0.7606	0.878	0.8145	0.8681	0.8394	0.8786	0.9247	0.9514	0.9164	0.9163	0.9298	0.9457	0.9466	0.9848	3.717e-05
GO:0048598_embryonic_morphogenesis	6.519e-05	0.0001158	0.1325	0.2222	0.3822	0.02216	0.1282	0.167	0.07945	0.4703	0.5013	0.4572	0.7869	0.5605	0.7175	0.5921	0.78	0.7815	0.7892	0.833	0.8122	0.8548	0.7791	0.7619	0.759	0.8522	0.8617	0.9156	0.85	0.8724	0.9315	0.9591	0.9291	0.9343	0.9338	0.9481	0.9482	0.9848	3.717e-05
GO:0016481_negative_regulation_of_transcription	0.05846	0.04349	0.03045	0.407	0.4453	0.08557	0.07136	0.303	0.4574	0.5592	0.5376	0.6334	0.7172	0.6442	0.6953	0.5921	0.8207	0.848	0.8173	0.8334	0.8392	0.8615	0.7605	0.7779	0.7906	0.9046	0.8904	0.8732	0.8635	0.8611	0.9096	0.9514	0.9164	0.9141	0.9286	0.9457	0.9466	0.9848	3.717e-05
GO:0007169_transmembrane_receptor_protein_tyrosine_kinase_signaling_pathway	6.519e-05	0.01226	0.03981	0.03227	0.4566	0.05881	0.2057	0.4145	0.3459	0.431	0.5887	0.5606	0.7308	0.5661	0.6826	0.6581	0.6378	0.7815	0.674	0.7368	0.7642	0.7721	0.6964	0.7116	0.6903	0.8012	0.8449	0.8681	0.8027	0.8279	0.8509	0.9398	0.8982	0.9062	0.9286	0.9254	0.9446	0.9848	3.717e-05
GO:0007167_enzyme_linked_receptor_protein_signaling_pathway	6.519e-05	0.00826	0.007076	0.0618	0.5604	0.08063	0.144	0.4497	0.3334	0.6047	0.7212	0.6189	0.8164	0.7051	0.7322	0.6902	0.7795	0.7848	0.7807	0.8532	0.8182	0.8592	0.7906	0.7807	0.7837	0.8199	0.8704	0.8968	0.8454	0.8787	0.9172	0.9514	0.9165	0.9343	0.9382	0.9457	0.9489	0.9848	3.717e-05
GO:0021987_cerebral_cortex_development	0.09067	0.1572	0.02578	0.3583	0.4459	0.3787	0.542	0.4243	0.3975	0.1719	0.5265	0.4665	0.6816	0.6623	0.5365	0.5921	0.6827	0.7659	0.7225	0.6891	0.71	0.7492	0.6197	0.6988	0.5707	0.7465	0.8449	0.847	0.7742	0.7092	0.8294	0.937	0.8982	0.9005	0.9166	0.8444	0.8288	0.9848	0.06164
GO:0021537_telencephalon_development	0.004494	0.1174	0.1163	0.07389	0.4855	0.09763	0.4	0.4377	0.3524	0.2003	0.5259	0.5206	0.6931	0.6623	0.3714	0.4715	0.7229	0.7538	0.7807	0.788	0.7378	0.804	0.7412	0.7554	0.7361	0.7685	0.8257	0.8113	0.8381	0.8279	0.8509	0.9398	0.9029	0.9062	0.9261	0.8962	0.926	0.9848	0.002002
GO:0021543_pallium_development	0.06471	0.2242	0.031	0.3021	0.5909	0.3624	0.5176	0.5021	0.4361	0.3044	0.6297	0.5092	0.7411	0.7336	0.495	0.5562	0.7706	0.7845	0.7892	0.8127	0.7498	0.8318	0.7412	0.7703	0.725	0.8096	0.8629	0.847	0.8381	0.8279	0.8728	0.9514	0.9029	0.9062	0.9286	0.8962	0.8863	0.9848	0.03353
GO:0021761_limbic_system_development	0.02325	0.2916	0.3437	0.2265	0.5597	0.2602	0.478	0.4834	0.3406	0.4221	0.6025	0.5508	0.7256	0.6976	0.4305	0.6271	0.7322	0.7659	0.7892	0.7837	0.7201	0.8366	0.7605	0.7744	0.7836	0.7968	0.812	0.8124	0.8381	0.8453	0.877	0.9473	0.9029	0.9062	0.9261	0.9245	0.9446	0.9848	0.005928
GO:0009880_embryonic_pattern_specification	0.04398	0.1047	0.1801	0.238	0.3304	0.3992	0.3619	0.5698	0.4925	0.3819	0.5671	0.7086	0.67	0.6873	0.6441	0.5683	0.78	0.7694	0.7892	0.7865	0.8181	0.7202	0.7429	0.7604	0.7931	0.8285	0.8617	0.847	0.8381	0.8456	0.8509	0.9398	0.9029	0.9005	0.9227	0.9457	0.9466	0.9848	7.362e-05
GO:0006338_chromatin_remodeling	0.46	0.1887	0.3771	0.04867	0.3595	0.353	0.6461	0.3114	0.2785	0.1164	0.3563	0.5481	0.4226	0.1778	0.211	0.9031	0.2432	0.3247	0.501	0.4035	0.4693	0.3812	0.5333	0.5716	0.589	0.431	0.447	0.4913	0.6138	0.5205	0.543	0.5356	0.6352	0.6492	0.673	0.6185	0.7899	0.9848	0.2296
GO:0060349_bone_morphogenesis	0.003937	0.004334	0.1708	0.09918	0.1927	0.05629	0.04113	0.07286	0.1147	0.05775	0.182	0.1817	0.3844	0.4275	0.4264	0.5355	0.6006	0.3926	0.6942	0.4035	0.5092	0.544	0.5128	0.5546	0.536	0.4753	0.4979	0.7348	0.6992	0.6006	0.6751	0.7142	0.7922	0.7198	0.706	0.676	0.8505	0.9848	0.0006022
GO:0021846_cell_proliferation_in_forebrain	0.08593	0.02364	0.224	0.151	0.1608	0.1481	0.3793	0.1981	0.2308	0.07067	0.2468	0.1806	0.3126	0.2689	0.2462	0.5201	0.2971	0.4797	0.3994	0.5276	0.5634	0.4923	0.4952	0.413	0.4629	0.5252	0.5532	0.6673	0.583	0.6642	0.6646	0.7142	0.6608	0.7315	0.7793	0.7472	0.7425	0.9848	0.01285
GO:0048863_stem_cell_differentiation	6.519e-05	0.004901	0.1318	0.07389	0.1013	0.1445	0.425	0.08741	0.09589	0.1101	0.1514	0.1448	0.4054	0.3113	0.2604	0.78	0.3891	0.4162	0.501	0.7759	0.5006	0.544	0.5096	0.5102	0.4961	0.5048	0.5494	0.847	0.583	0.6089	0.6581	0.8595	0.7922	0.732	0.8853	0.6562	0.6482	0.9848	3.717e-05
GO:0021536_diencephalon_development	0.006308	0.03732	0.1147	0.1437	0.1815	0.1392	0.3488	0.2178	0.08552	0.3727	0.2364	0.2909	0.4684	0.4573	0.4804	0.5448	0.5269	0.4309	0.501	0.5926	0.4693	0.544	0.496	0.5102	0.5345	0.4826	0.4058	0.8362	0.6038	0.7025	0.6608	0.7302	0.7103	0.732	0.747	0.7208	0.8464	0.9848	0.003699
GO:0051130_positive_regulation_of_cellular_component_organization	0.007254	0.02628	0.1907	0.1318	0.1357	0.07421	0.498	0.1855	0.0681	0.367	0.3063	0.3169	0.5407	0.2264	0.3948	0.5806	0.6483	0.4598	0.501	0.4792	0.5634	0.544	0.5107	0.5214	0.5345	0.5048	0.5198	0.8113	0.6897	0.6642	0.7692	0.7785	0.8059	0.7198	0.7105	0.7208	0.8025	0.9848	0.01043
GO:0007568_aging	0.105	0.0354	0.1433	0.1999	0.0814	0.1463	0.6433	0.1887	0.1438	0.3906	0.3432	0.4344	0.5532	0.4196	0.3934	0.7765	0.5508	0.4783	0.501	0.5897	0.5299	0.6223	0.5373	0.5898	0.5345	0.5021	0.5551	0.847	0.583	0.6713	0.7687	0.8037	0.7693	0.732	0.747	0.8738	0.8345	0.9848	0.01949
GO:0021983_pituitary_gland_development	0.01635	0.07724	0.2369	0.2293	0.347	0.2587	0.4973	0.2036	0.1054	0.503	0.3126	0.3876	0.5233	0.5874	0.5913	0.6581	0.6176	0.4783	0.579	0.6131	0.5006	0.648	0.5333	0.5857	0.5844	0.5273	0.4663	0.847	0.6483	0.7025	0.6572	0.8097	0.8289	0.749	0.7465	0.8002	0.8594	0.9848	0.003309
GO:0021884_forebrain_neuron_development	0.04652	0.04172	0.1411	0.105	0.4005	0.1242	0.3165	0.303	0.3038	0.2337	0.3924	0.402	0.5353	0.3388	0.379	0.5507	0.4039	0.5106	0.579	0.6131	0.5596	0.593	0.5333	0.5899	0.5606	0.531	0.5499	0.7727	0.6125	0.6835	0.6697	0.7142	0.7663	0.7208	0.8593	0.7765	0.8025	0.9848	0.08466
GO:0002089_lens_morphogenesis_in_camera-type_eye	0.02154	0.05716	0.1757	0.1772	0.3787	0.1919	0.3488	0.2501	0.219	0.1348	0.3003	0.2952	0.4595	0.4512	0.4671	0.5921	0.4744	0.4937	0.6533	0.7368	0.5634	0.648	0.5654	0.5728	0.5707	0.5491	0.5877	0.7662	0.6188	0.6835	0.6734	0.8595	0.8397	0.7789	0.8739	0.8435	0.7899	0.9848	0.02778
GO:0007507_heart_development	0.001441	0.001145	0.08015	0.09891	0.246	0.1915	0.4997	0.05455	0.129	0.3511	0.1514	0.2853	0.3964	0.4984	0.4946	0.7354	0.4548	0.6703	0.501	0.6453	0.569	0.6307	0.4431	0.413	0.4671	0.6728	0.7261	0.847	0.583	0.6764	0.7564	0.8948	0.7546	0.7973	0.8667	0.7454	0.7776	0.9848	3.717e-05
GO:0001709_cell_fate_determination	0.03095	0.004919	0.3323	0.07389	0.2521	0.1117	0.3722	0.2604	0.181	0.2351	0.2767	0.4693	0.4504	0.2881	0.302	0.6581	0.365	0.7033	0.5797	0.478	0.6461	0.6223	0.5333	0.5898	0.5345	0.7154	0.8229	0.7538	0.6246	0.7012	0.6503	0.9063	0.8472	0.8309	0.8666	0.8894	0.8505	0.9848	0.000136
GO:0048568_embryonic_organ_development	0.01621	0.006111	0.5762	0.2354	0.133	0.1731	0.4706	0.1855	0.2785	0.4629	0.2448	0.4572	0.3658	0.3932	0.4784	0.67	0.6002	0.719	0.5773	0.5756	0.6131	0.648	0.5299	0.5106	0.5345	0.7154	0.7447	0.8753	0.6038	0.7051	0.6798	0.9383	0.8472	0.8147	0.8988	0.8406	0.8377	0.9848	3.717e-05
GO:0008283_cell_proliferation	0.148	0.1378	0.2741	0.2622	0.2068	0.03735	0.04903	0.314	0.3331	0.5868	0.3003	0.4693	0.4745	0.4729	0.3808	0.5448	0.5748	0.5404	0.7473	0.7355	0.5092	0.544	0.5089	0.6284	0.5606	0.6432	0.7261	0.7124	0.6038	0.7051	0.5757	0.7142	0.7745	0.7198	0.662	0.6602	0.7875	0.9848	0.02909
GO:0030100_regulation_of_endocytosis	0.03355	0.1939	0.6964	0.1944	0.1027	0.5884	0.8197	0.4033	0.2062	0.5919	0.3017	0.6189	0.4504	0.3116	0.6026	0.8218	0.3351	0.4797	0.2499	0.5447	0.5803	0.3157	0.272	0.2825	0.2999	0.459	0.5524	0.847	0.5109	0.6089	0.5631	0.6932	0.5402	0.7198	0.7105	0.7658	0.6344	0.6467	0.1532
GO:0042592_homeostatic_process	0.0063	0.05207	0.7626	0.2576	0.228	0.3264	0.6976	0.3685	0.3065	0.3652	0.4644	0.5488	0.5476	0.4009	0.3841	0.689	0.4079	0.497	0.3495	0.5944	0.6941	0.5815	0.5338	0.413	0.4778	0.5249	0.7118	0.847	0.575	0.7432	0.7687	0.8592	0.6542	0.8424	0.8593	0.8962	0.8345	0.9848	0.0007312
GO:0048259_regulation_of_receptor-mediated_endocytosis	0.03417	0.1975	0.379	0.4295	0.3914	0.3077	0.5064	0.3204	0.2394	0.6776	0.4994	0.472	0.5545	0.5397	0.6332	0.6034	0.5047	0.4783	0.501	0.5944	0.5769	0.6307	0.5283	0.4524	0.5606	0.5249	0.5379	0.7549	0.6038	0.7545	0.6572	0.8447	0.6816	0.7645	0.7105	0.8444	0.7354	0.956	0.1058
GO:0045807_positive_regulation_of_endocytosis	0.02873	0.3652	0.6198	0.4947	0.2268	0.387	0.6433	0.5315	0.3065	0.7354	0.4747	0.6633	0.6646	0.4148	0.6832	0.6532	0.5508	0.5626	0.3105	0.7092	0.7116	0.647	0.5333	0.4152	0.4466	0.5486	0.615	0.847	0.5783	0.7932	0.6697	0.8595	0.6542	0.8224	0.8025	0.8962	0.7354	0.8443	0.1612
GO:0021872_generation_of_neurons_in_the_forebrain	0.1446	0.07586	0.01044	0.1944	0.5604	0.4215	0.6515	0.1855	0.1517	0.1494	0.3003	0.1955	0.5973	0.6404	0.6186	0.7916	0.627	0.719	0.7473	0.7368	0.5244	0.8021	0.5421	0.688	0.5886	0.7269	0.5565	0.8755	0.7707	0.4588	0.7304	0.8948	0.8568	0.7677	0.8407	0.5914	0.7899	0.9848	0.1198
GO:0003007_heart_morphogenesis	0.002853	0.03732	0.2522	0.3752	0.4818	0.3808	0.5176	0.2348	0.1927	0.6219	0.2011	0.465	0.5379	0.6823	0.6676	0.7811	0.5771	0.6481	0.501	0.7285	0.5092	0.6565	0.4758	0.4935	0.5271	0.6243	0.6888	0.8755	0.5917	0.6735	0.6712	0.8848	0.6816	0.7973	0.8593	0.6342	0.7296	0.9848	0.0008253
GO:0060415_muscle_tissue_morphogenesis	0.003791	0.1383	0.2932	0.4154	0.4516	0.4686	0.7117	0.2957	0.266	0.6782	0.4083	0.5886	0.67	0.6648	0.6536	0.8781	0.5748	0.6164	0.501	0.7837	0.5634	0.6804	0.5333	0.5106	0.5271	0.4313	0.7444	0.8977	0.6302	0.7	0.7291	0.8948	0.7922	0.8424	0.8908	0.6562	0.7425	0.9848	0.01043
GO:0055008_cardiac_muscle_tissue_morphogenesis	0.003791	0.1383	0.2932	0.4154	0.4516	0.4686	0.7117	0.2957	0.266	0.6782	0.4083	0.5886	0.67	0.6648	0.6536	0.8781	0.5748	0.6164	0.501	0.7837	0.5634	0.6804	0.5333	0.5106	0.5271	0.4313	0.7444	0.8977	0.6302	0.7	0.7291	0.8948	0.7922	0.8424	0.8908	0.6562	0.7425	0.9848	0.01043
GO:0032535_regulation_of_cellular_component_size	0.006639	0.1365	0.1224	0.2817	0.1948	0.5998	0.7289	0.1971	0.07491	0.63	0.4065	0.4498	0.6551	0.6623	0.7214	0.8581	0.7726	0.5106	0.7518	0.7282	0.5299	0.6945	0.5333	0.6	0.606	0.6138	0.7748	0.8868	0.7707	0.7432	0.6581	0.8948	0.8851	0.8286	0.747	0.7681	0.7899	0.9848	0.009385
GO:0090066_regulation_of_anatomical_structure_size	0.006385	0.107	0.1286	0.2622	0.2565	0.5911	0.6636	0.167	0.06893	0.5919	0.37	0.4503	0.6483	0.6811	0.7472	0.8236	0.7726	0.5459	0.7537	0.7837	0.5244	0.7436	0.5421	0.6734	0.659	0.6509	0.7896	0.8755	0.7707	0.7103	0.6646	0.8948	0.8982	0.8446	0.7814	0.7208	0.8345	0.9848	0.001023
GO:0044087_regulation_of_cellular_component_biogenesis	0.07364	0.1166	0.01418	0.5915	0.2756	0.5628	0.7359	0.1971	0.1183	0.4658	0.4083	0.3348	0.7256	0.6393	0.7495	0.8605	0.7628	0.7131	0.6155	0.7189	0.5244	0.7721	0.5333	0.5898	0.5465	0.7224	0.7569	0.8755	0.7364	0.6089	0.7873	0.8948	0.8362	0.8303	0.8908	0.6339	0.7466	0.9848	0.01307
GO:0016568_chromatin_modification	0.6948	0.1572	0.01044	0.2851	0.5444	0.8233	0.8756	0.1432	0.2454	0.2267	0.1744	0.4572	0.3693	0.6648	0.6795	0.1227	0.6167	0.6703	0.6706	0.5756	0.5006	0.647	0.4523	0.5106	0.5084	0.7224	0.5565	0.847	0.6749	0.4588	0.6254	0.804	0.6517	0.7198	0.673	0.4854	0.6104	0.8851	0.4226
GO:0016569_covalent_chromatin_modification	0.7363	0.3246	0.007843	0.687	0.653	0.4708	0.8976	0.3114	0.3931	0.309	0.3637	0.5092	0.4742	0.7443	0.7692	0.3178	0.7706	0.7659	0.7737	0.6665	0.6568	0.7721	0.5333	0.6232	0.6023	0.8096	0.7261	0.8868	0.7784	0.6089	0.7687	0.8948	0.3465	0.7996	0.8141	0.7517	0.7498	0.8849	0.5994
GO:0016570_histone_modification	0.6948	0.3641	0.01218	0.6982	0.6698	0.4388	0.8976	0.3605	0.4268	0.3167	0.3907	0.5481	0.4923	0.7443	0.7775	0.2249	0.7718	0.7694	0.7731	0.706	0.6845	0.7651	0.5349	0.6284	0.628	0.8096	0.7444	0.8815	0.7797	0.6089	0.7687	0.8948	0.3465	0.8209	0.8205	0.7681	0.7899	0.8698	0.6383
GO:0044267_cellular_protein_metabolic_process	0.8209	0.3591	0.0001893	0.0401	0.07391	0.5295	0.8976	0.1194	0.3558	0.6799	0.3432	0.2909	0.5539	0.9314	0.7845	0.732	0.8245	0.821	0.777	0.6915	0.4863	0.6598	0.4256	0.6177	0.4591	0.5641	0.7954	0.9243	0.6038	0.4979	0.6197	0.9038	0.4237	0.3098	0.1538	0.1685	0.1796	0.003283	0.6835
GO:0019538_protein_metabolic_process	0.8209	0.4807	0.0001893	0.07217	0.2222	0.6572	0.8976	0.2241	0.484	0.7065	0.4811	0.4665	0.5548	0.9126	0.8269	0.9267	0.8207	0.8093	0.7789	0.7878	0.5844	0.718	0.5333	0.6284	0.5654	0.6359	0.7954	0.9156	0.6983	0.676	0.6646	0.9063	0.3465	0.3251	0.4425	0.4242	0.4042	0.0167	0.7243
GO:0034470_ncRNA_processing	0.6821	0.7567	0.6761	0.7348	0.04454	0.8754	0.8976	0.02253	0.6635	0.8677	0.8434	0.1205	0.5548	0.9317	0.8768	0.9267	0.249	0.541	0.6799	0.1558	0.1507	0.8902	0.5807	0.7019	0.8029	0.6072	0.135	0.7576	0.3641	0.7452	0.8177	0.9032	0.1622	0.7939	0.03273	0.5877	0.6179	0.6563	0.7582
GO:0031057_negative_regulation_of_histone_modification	0.7081	0.6131	0.09708	0.5305	0.4459	0.04239	0.08875	0.724	0.7336	0.6799	0.7821	0.792	0.7974	0.3365	0.4896	0.1225	0.5756	0.7659	0.7745	0.8811	0.8392	0.7631	0.8149	0.7553	0.7841	0.7968	0.8629	0.585	0.8381	0.8851	0.8629	0.9375	0.9029	0.9062	0.9286	0.9483	0.9482	0.9848	0.2654
GO:0009582_detection_of_abiotic_stimulus	0.255	0.6612	0.253	0.3654	0.0854	0.02279	0.2831	0.7638	0.6986	0.7997	0.797	0.8394	0.8174	0.2773	0.6536	0.3704	0.7552	0.7373	0.7867	0.8127	0.8228	0.8366	0.8045	0.7807	0.8029	0.7224	0.8449	0.7791	0.8381	0.8963	0.8959	0.9383	0.905	0.9062	0.9222	0.9647	0.9466	0.9848	0.3547
GO:0050906_detection_of_stimulus_involved_in_sensory_perception	0.4144	0.7175	0.1102	0.5556	0.3159	0.04838	0.255	0.7941	0.7512	0.8426	0.8264	0.839	0.8404	0.5123	0.7214	0.2559	0.766	0.7694	0.7793	0.833	0.8392	0.8486	0.8045	0.7744	0.8081	0.7968	0.8564	0.7439	0.8381	0.9072	0.9152	0.9398	0.905	0.9062	0.9286	0.962	0.9466	0.9848	0.5131
GO:0007166_cell_surface_receptor_linked_signaling_pathway	0.28	0.81	0.001547	0.2622	0.4162	0.000798	0.001584	0.8831	0.8794	0.7828	0.9167	0.9017	0.9179	0.5597	0.379	0.004634	0.8481	0.8682	0.8916	0.9268	0.9226	0.9185	0.9206	0.8967	0.91	0.9191	0.9497	0.3362	0.9423	0.9534	0.9722	0.9591	0.9686	0.9598	0.9767	0.986	0.9736	0.9848	0.08741
GO:0009605_response_to_external_stimulus	0.1221	0.6264	0.07282	0.2619	0.09043	0.00397	0.04677	0.8373	0.8021	0.7515	0.8637	0.8744	0.863	0.364	0.4746	0.06655	0.7664	0.7694	0.7892	0.8811	0.8721	0.8682	0.8707	0.8075	0.862	0.8096	0.8665	0.8399	0.8783	0.9204	0.9315	0.9514	0.9291	0.9163	0.9298	0.9849	0.9736	0.9848	0.006249
GO:0007154_cell_communication	0.001831	0.5524	0.02568	0.1772	0.1802	0.00397	0.01159	0.8831	0.8448	0.7751	0.9167	0.9017	0.9113	0.5895	0.4671	0.212	0.8207	0.8516	0.8753	0.9312	0.9226	0.9126	0.9206	0.8967	0.91	0.9191	0.9381	0.8399	0.9423	0.9534	0.9722	0.9628	0.9686	0.9618	0.9767	0.986	0.9736	0.9848	0.0002004
GO:0007165_signal_transduction	0.004494	0.6078	0.03911	0.1931	0.2724	0.004194	0.01147	0.8831	0.8613	0.7991	0.9167	0.9017	0.9146	0.5717	0.4859	0.2042	0.8207	0.8511	0.8747	0.9307	0.9226	0.9097	0.9206	0.896	0.91	0.9183	0.9369	0.8113	0.9423	0.9534	0.9722	0.9628	0.9686	0.9598	0.9767	0.986	0.9736	0.9848	0.001328
GO:0007267_cell-cell_signaling	6.519e-05	0.1939	0.1164	0.4891	0.17	0.0146	0.1428	0.763	0.7546	0.693	0.8435	0.8595	0.8725	0.6032	0.72	0.3229	0.8207	0.8648	0.8295	0.9004	0.8835	0.9089	0.8865	0.8494	0.8676	0.8851	0.9333	0.9229	0.8984	0.9256	0.9519	0.9628	0.9505	0.939	0.9605	0.986	0.9736	0.9848	3.717e-05
GO:0006955_immune_response	0.6671	0.6898	0.6116	0.3239	0.4156	0.02216	0.417	0.8831	0.8297	0.8107	0.702	0.7094	0.8435	0.3682	0.6252	0.003292	0.5756	0.8181	0.7725	0.9004	0.8873	0.8726	0.8009	0.7879	0.7226	0.8286	0.9005	0.8398	0.8235	0.9328	0.9096	0.9036	0.7518	0.9218	0.8664	0.986	0.9705	0.9848	0.3995
GO:0045087_innate_immune_response	0.6697	0.7819	0.5409	0.6868	0.5804	0.4533	0.4864	0.8667	0.8555	0.7018	0.8828	0.8526	0.8426	0.6648	0.7496	0.01235	0.7706	0.8538	0.7917	0.9004	0.8666	0.888	0.8152	0.8025	0.8458	0.8051	0.9005	0.847	0.7798	0.9062	0.845	0.9514	0.8867	0.7982	0.7448	0.9728	0.9489	0.9848	0.6833
GO:0007186_G-protein_coupled_receptor_protein_signaling_pathway	0.8215	0.8039	0.0728	0.3879	0.8384	0.2706	0.1296	0.7733	0.8794	0.9119	0.8173	0.9017	0.8435	0.802	0.8741	0.008722	0.935	0.9457	0.9181	0.9598	0.9226	0.9557	0.9206	0.8967	0.7765	0.9532	0.9588	0.847	0.9423	0.9534	0.9722	0.9886	0.9686	0.9687	0.9767	0.986	0.9736	0.9848	0.7582
GO:0050877_neurological_system_process	0.8215	0.8382	0.02241	0.5054	0.6904	0.2178	0.03811	0.7727	0.8794	0.9119	0.9167	0.9017	0.8435	0.8714	0.8804	0.0139	0.935	0.9457	0.9181	0.9598	0.9226	0.9557	0.9206	0.8967	0.91	0.9547	0.9588	0.8755	0.9423	0.9534	0.9722	0.9886	0.9686	0.9687	0.9767	0.986	0.9736	0.9848	0.7582
GO:0003008_system_process	0.8215	0.8452	0.1567	0.8948	0.7085	0.1551	0.102	0.8831	0.8794	0.9119	0.9167	0.9017	0.9322	0.9047	0.9031	0.03853	0.935	0.9457	0.9181	0.9598	0.9226	0.9557	0.9206	0.8967	0.91	0.9547	0.9588	0.9156	0.9423	0.9534	0.9722	0.9886	0.9686	0.9687	0.9767	0.986	0.9736	0.9848	0.724
GO:0070838_divalent_metal_ion_transport	0.02671	0.1545	0.5536	0.3257	0.124	0.04486	0.5296	0.4489	0.4916	0.664	0.5205	0.6189	0.7115	0.2484	0.4896	0.6581	0.5748	0.719	0.7518	0.8127	0.7293	0.8412	0.7429	0.7127	0.7154	0.7147	0.8117	0.8815	0.7797	0.8611	0.8541	0.9514	0.8982	0.9005	0.9227	0.9457	0.9364	0.9848	0.001023
GO:0006816_calcium_ion_transport	0.03449	0.2054	0.5551	0.3772	0.1815	0.04521	0.5168	0.5212	0.551	0.688	0.613	0.6525	0.7503	0.3376	0.5972	0.6733	0.6423	0.7659	0.78	0.833	0.7642	0.8621	0.7791	0.7553	0.7582	0.7485	0.8449	0.8968	0.8144	0.8759	0.8959	0.9514	0.9029	0.9062	0.9286	0.9481	0.9465	0.9848	0.0007954
GO:0060042_retina_morphogenesis_in_camera-type_eye	0.00864	0.2822	0.6645	0.5168	0.2575	0.05241	0.3806	0.6735	0.581	0.5737	0.7427	0.7589	0.7545	0.2574	0.6551	0.6581	0.5748	0.719	0.7473	0.8127	0.7979	0.8086	0.7717	0.7037	0.7648	0.7224	0.812	0.8567	0.8381	0.8786	0.8853	0.9459	0.8982	0.9062	0.9261	0.9481	0.9466	0.9848	0.03225
GO:0048857_neural_nucleus_development	0.1338	0.2822	0.253	0.3385	0.305	0.04838	0.2913	0.6184	0.5726	0.6707	0.6541	0.7622	0.7137	0.4498	0.5775	0.5294	0.6816	0.7134	0.7892	0.833	0.7979	0.8086	0.7836	0.7493	0.8021	0.7675	0.7954	0.847	0.8381	0.8636	0.877	0.9398	0.9029	0.9005	0.9015	0.9457	0.9482	0.9848	0.01877
GO:0022037_metencephalon_development	0.01783	0.1938	0.3871	0.08095	0.2946	0.1251	0.2932	0.7049	0.6018	0.6756	0.7361	0.765	0.8164	0.4572	0.5775	0.5926	0.6947	0.7659	0.7793	0.8127	0.8294	0.8412	0.8053	0.7807	0.7931	0.7713	0.8449	0.847	0.8381	0.8787	0.9247	0.9514	0.9164	0.9122	0.9298	0.962	0.9489	0.9848	0.001023
GO:0007610_behavior	0.007491	0.3263	0.3714	0.2967	0.1256	0.01494	0.3977	0.7471	0.659	0.63	0.7715	0.8325	0.8069	0.4088	0.5971	0.5921	0.5811	0.7131	0.7518	0.8254	0.828	0.7994	0.8141	0.7733	0.8081	0.6207	0.8564	0.847	0.8381	0.8786	0.877	0.9398	0.9164	0.9005	0.9286	0.9647	0.958	0.9848	0.01674
GO:0055065_metal_ion_homeostasis	0.003604	0.3708	0.5802	0.2919	0.1476	0.2233	0.5257	0.5964	0.5909	0.6756	0.6841	0.7178	0.7411	0.5171	0.5659	0.658	0.5748	0.7398	0.6397	0.8307	0.8181	0.7721	0.7791	0.7037	0.7221	0.7224	0.8564	0.847	0.7893	0.8786	0.877	0.9398	0.8982	0.9062	0.9166	0.9483	0.8852	0.9848	0.008673
GO:0006875_cellular_metal_ion_homeostasis	0.008581	0.4085	0.6092	0.327	0.1752	0.227	0.5248	0.6375	0.6431	0.6756	0.7358	0.7459	0.7769	0.5123	0.6164	0.6581	0.5811	0.7659	0.6706	0.833	0.828	0.7947	0.8045	0.7242	0.745	0.7363	0.8629	0.847	0.8135	0.8787	0.8959	0.9398	0.8993	0.9062	0.9227	0.949	0.9466	0.9848	0.01899
GO:0055074_calcium_ion_homeostasis	0.007313	0.364	0.5333	0.2622	0.1608	0.1524	0.542	0.6404	0.6448	0.6782	0.7249	0.7543	0.7869	0.5018	0.6075	0.6569	0.6176	0.7694	0.7085	0.8639	0.8392	0.8068	0.8045	0.7493	0.7606	0.7528	0.8617	0.8484	0.8314	0.896	0.908	0.9514	0.9029	0.9062	0.927	0.9618	0.9482	0.9848	0.006209
GO:0006874_cellular_calcium_ion_homeostasis	0.01189	0.3981	0.527	0.2824	0.1821	0.1464	0.5064	0.6561	0.6587	0.6799	0.7427	0.7571	0.7974	0.4945	0.6333	0.6297	0.6252	0.7694	0.7085	0.8688	0.8392	0.8086	0.8045	0.7493	0.7624	0.7794	0.8629	0.847	0.8381	0.895	0.9102	0.9514	0.9029	0.9122	0.927	0.962	0.9482	0.9848	0.01332
GO:0007398_ectoderm_development	0.007146	0.3198	0.7341	0.3101	0.2946	0.3209	0.4867	0.63	0.5527	0.7203	0.7249	0.7617	0.7869	0.5983	0.6551	0.7354	0.7628	0.7659	0.7473	0.8677	0.8182	0.8412	0.7791	0.7493	0.7836	0.7224	0.8561	0.889	0.8381	0.8918	0.9134	0.9514	0.9164	0.9175	0.9298	0.962	0.9482	0.9848	0.007792
GO:0051048_negative_regulation_of_secretion	0.04789	0.4487	0.6847	0.327	0.3895	0.2163	0.5032	0.5831	0.5945	0.6399	0.7249	0.7715	0.783	0.6426	0.7214	0.7279	0.7628	0.7659	0.7473	0.8445	0.8237	0.8412	0.7791	0.7513	0.7837	0.7224	0.8564	0.8868	0.8381	0.8546	0.905	0.9454	0.9029	0.9062	0.9286	0.9457	0.9466	0.9848	0.006158
GO:0048878_chemical_homeostasis	6.519e-05	0.1186	0.7517	0.4459	0.2401	0.324	0.7127	0.5579	0.5435	0.6827	0.6531	0.6525	0.7627	0.5784	0.6488	0.7811	0.6268	0.719	0.579	0.8694	0.7998	0.8318	0.7412	0.6	0.6681	0.7224	0.8449	0.8968	0.7636	0.8787	0.8959	0.9514	0.8982	0.9062	0.9286	0.9481	0.9446	0.9848	0.000136
GO:0050801_ion_homeostasis	0.001145	0.1777	0.7755	0.4509	0.1917	0.3693	0.709	0.5597	0.5712	0.6756	0.6541	0.7033	0.7974	0.5372	0.6263	0.7906	0.6502	0.7659	0.7334	0.8523	0.8246	0.8486	0.7717	0.7037	0.7152	0.7713	0.8617	0.8968	0.7925	0.8787	0.9096	0.9514	0.9029	0.9163	0.9286	0.9483	0.9466	0.9848	0.0002298
GO:0055080_cation_homeostasis	0.008909	0.4217	0.7517	0.566	0.1927	0.3141	0.6964	0.6612	0.6557	0.688	0.7427	0.7512	0.8085	0.5714	0.6463	0.6983	0.5811	0.7694	0.6462	0.8523	0.8357	0.8224	0.8045	0.6988	0.7221	0.7903	0.8629	0.8582	0.8027	0.8787	0.905	0.9514	0.9029	0.9163	0.9286	0.9504	0.9466	0.9848	0.01559
GO:0030003_cellular_cation_homeostasis	0.02218	0.4496	0.8079	0.5716	0.3481	0.387	0.7398	0.6584	0.6591	0.6782	0.7415	0.7328	0.7974	0.5958	0.6612	0.7906	0.6266	0.7815	0.6804	0.8445	0.828	0.8254	0.8045	0.7037	0.725	0.8096	0.8665	0.847	0.8027	0.8759	0.8959	0.9514	0.8993	0.9062	0.9261	0.9483	0.9466	0.9848	0.04538
GO:0060541_respiratory_system_development	0.0002757	0.007871	0.4662	0.2622	0.3883	0.1644	0.4556	0.396	0.4135	0.5246	0.5585	0.6223	0.7256	0.6238	0.6676	0.6581	0.7573	0.7845	0.7778	0.7853	0.7908	0.8225	0.7168	0.7493	0.745	0.8192	0.8561	0.8755	0.8144	0.8611	0.8959	0.9514	0.9029	0.9062	0.9286	0.9457	0.9466	0.9848	3.717e-05
GO:0030323_respiratory_tube_development	0.003604	0.02938	0.342	0.2605	0.4162	0.1426	0.4027	0.4545	0.4574	0.5636	0.6163	0.64	0.7305	0.6393	0.643	0.5802	0.7706	0.7845	0.7882	0.7853	0.7979	0.8225	0.7412	0.7702	0.7606	0.8192	0.8629	0.847	0.8381	0.8611	0.901	0.9514	0.9164	0.9062	0.9286	0.9457	0.9466	0.9848	3.717e-05
GO:0030324_lung_development	0.001794	0.02863	0.5212	0.2936	0.4358	0.2375	0.5199	0.4698	0.4809	0.5919	0.6206	0.6492	0.7545	0.6833	0.72	0.6581	0.7961	0.8121	0.7892	0.8083	0.802	0.8486	0.7443	0.7733	0.7673	0.8285	0.8629	0.8755	0.8381	0.8611	0.908	0.9514	0.9164	0.9122	0.9286	0.9457	0.9466	0.9848	3.717e-05
GO:0006813_potassium_ion_transport	0.0008674	0.1186	0.4434	0.1806	0.4358	0.1953	0.4798	0.4582	0.4135	0.4177	0.6197	0.6189	0.7172	0.6995	0.6332	0.7429	0.7308	0.7694	0.7892	0.7837	0.7979	0.8486	0.7984	0.7553	0.7931	0.8173	0.8449	0.8927	0.8454	0.8611	0.8959	0.9514	0.9165	0.9062	0.9298	0.9457	0.9485	0.9848	3.717e-05
GO:0046885_regulation_of_hormone_biosynthetic_process	0.04025	0.2094	0.4554	0.3973	0.4749	0.1251	0.4798	0.5212	0.5413	0.6047	0.6531	0.7167	0.7538	0.4889	0.6607	0.5921	0.7389	0.7876	0.7892	0.8127	0.8122	0.8412	0.7836	0.7554	0.7837	0.8192	0.8617	0.8755	0.8381	0.8447	0.9008	0.9514	0.9029	0.9125	0.9298	0.9457	0.9466	0.9848	0.002592
GO:0031054_pre-microRNA_processing	0.01793	0.2476	0.4876	0.4295	0.314	0.1919	0.3801	0.5698	0.5719	0.5969	0.7004	0.6624	0.7864	0.5874	0.6441	0.693	0.7654	0.7845	0.7892	0.8049	0.828	0.8412	0.8045	0.7619	0.7778	0.8256	0.8449	0.8724	0.8381	0.8611	0.9077	0.9514	0.9029	0.9062	0.9286	0.9457	0.9461	0.9848	0.07961
GO:0009888_tissue_development	6.519e-05	0.04112	0.6662	0.2622	0.4516	0.1658	0.455	0.467	0.2938	0.63	0.7223	0.6843	0.8174	0.7372	0.7807	0.7947	0.8391	0.7854	0.7892	0.9025	0.8392	0.9023	0.8274	0.8011	0.8029	0.8256	0.8809	0.949	0.8783	0.9159	0.9446	0.965	0.9455	0.9374	0.957	0.9701	0.963	0.9848	3.717e-05
GO:0030509_BMP_signaling_pathway	0.04025	0.1406	0.4039	0.3752	0.6008	0.2528	0.2932	0.5454	0.4598	0.646	0.7215	0.6682	0.7869	0.7021	0.6931	0.78	0.78	0.7659	0.7892	0.8559	0.7979	0.8682	0.8045	0.7807	0.7906	0.7968	0.8617	0.8755	0.8406	0.8787	0.9247	0.9514	0.9165	0.9062	0.9286	0.9457	0.9482	0.9848	0.002447
GO:0048864_stem_cell_development	0.0002364	0.06361	0.4554	0.4784	0.4162	0.1832	0.4731	0.5082	0.5306	0.5868	0.6053	0.5606	0.7769	0.6127	0.7214	0.8011	0.7634	0.7694	0.787	0.8983	0.7979	0.8528	0.7469	0.7702	0.7606	0.8106	0.8629	0.9156	0.8266	0.8456	0.9001	0.9514	0.9164	0.9062	0.9298	0.9457	0.9446	0.9848	0.0002004
GO:0019827_stem_cell_maintenance	0.001102	0.1287	0.5372	0.566	0.4889	0.2488	0.5046	0.5717	0.5979	0.659	0.6541	0.6332	0.8099	0.6873	0.7495	0.8253	0.8047	0.7876	0.7892	0.9015	0.8246	0.8682	0.7836	0.7824	0.7906	0.8466	0.8665	0.9221	0.8381	0.8611	0.9152	0.9514	0.9164	0.9163	0.9298	0.9457	0.9446	0.9848	0.000492
GO:0022604_regulation_of_cell_morphogenesis	0.04132	0.1118	0.2673	0.4986	0.5053	0.353	0.4963	0.5723	0.5435	0.5051	0.6255	0.7178	0.7869	0.6648	0.6449	0.8249	0.8136	0.8219	0.8157	0.8448	0.8392	0.8547	0.7943	0.8011	0.8021	0.8654	0.8629	0.8977	0.8635	0.8456	0.9292	0.9514	0.9196	0.9163	0.9298	0.9457	0.9489	0.9848	0.0001685
GO:0045667_regulation_of_osteoblast_differentiation	0.1055	0.03836	0.4561	0.5168	0.6236	0.3858	0.5064	0.3328	0.4649	0.431	0.5802	0.64	0.7869	0.6898	0.7683	0.7844	0.8238	0.8483	0.8191	0.8811	0.8181	0.9023	0.8045	0.8075	0.7931	0.8952	0.8629	0.8964	0.8657	0.8611	0.928	0.953	0.9164	0.9163	0.9298	0.9457	0.9466	0.9848	0.000136
GO:0048646_anatomical_structure_formation_involved_in_morphogenesis	0.0002757	0.07181	0.2522	0.5536	0.5889	0.324	0.5101	0.5404	0.3349	0.5592	0.7499	0.7167	0.8426	0.8141	0.8317	0.857	0.8503	0.8483	0.8157	0.9006	0.8392	0.9023	0.8045	0.798	0.7906	0.8852	0.9159	0.949	0.8783	0.879	0.9315	0.9628	0.9363	0.9374	0.9545	0.9483	0.9489	0.9848	3.717e-05
GO:0051046_regulation_of_secretion	0.006544	0.2805	0.6116	0.5637	0.4493	0.1919	0.3692	0.5944	0.5219	0.4925	0.7215	0.7033	0.7869	0.6791	0.7572	0.4555	0.7776	0.7243	0.7045	0.8127	0.7979	0.8225	0.7791	0.7493	0.7703	0.7224	0.8352	0.8868	0.8192	0.8456	0.9096	0.9398	0.9029	0.9062	0.9261	0.9457	0.9466	0.9848	0.0008253
GO:0050679_positive_regulation_of_epithelial_cell_proliferation	0.02218	0.2445	0.6095	0.5635	0.5094	0.2163	0.3463	0.6272	0.6236	0.5636	0.794	0.7178	0.8104	0.6734	0.7214	0.6581	0.8207	0.8133	0.8157	0.8326	0.8392	0.8412	0.8111	0.8011	0.8029	0.8401	0.8629	0.8724	0.875	0.8786	0.9152	0.9514	0.9164	0.9149	0.9298	0.9483	0.9482	0.9848	0.008673
GO:0030199_collagen_fibril_organization	0.01396	0.3192	0.6387	0.5556	0.4548	0.163	0.3148	0.6109	0.6333	0.7065	0.7715	0.7067	0.8174	0.7002	0.7489	0.5921	0.8136	0.7876	0.8	0.8776	0.8392	0.8757	0.8226	0.8015	0.8081	0.8161	0.8704	0.8755	0.8635	0.8787	0.9247	0.9514	0.9181	0.9163	0.9298	0.9483	0.9529	0.9848	0.02106
GO:0035108_limb_morphogenesis	0.0001245	0.03259	0.4312	0.4625	0.6236	0.1251	0.2057	0.5326	0.5413	0.688	0.6531	0.7111	0.8164	0.7006	0.6612	0.5595	0.815	0.8382	0.822	0.8785	0.8392	0.8726	0.8226	0.8015	0.7969	0.8851	0.8629	0.8875	0.8673	0.8986	0.9315	0.9591	0.9329	0.9343	0.9503	0.9607	0.9505	0.9848	3.717e-05
GO:0035107_appendage_morphogenesis	0.0001245	0.03259	0.4312	0.4625	0.6236	0.1251	0.2057	0.5326	0.5413	0.688	0.6531	0.7111	0.8164	0.7006	0.6612	0.5595	0.815	0.8382	0.822	0.8785	0.8392	0.8726	0.8226	0.8015	0.7969	0.8851	0.8629	0.8875	0.8673	0.8986	0.9315	0.9591	0.9329	0.9343	0.9503	0.9607	0.9505	0.9848	3.717e-05
GO:0060173_limb_development	0.0001245	0.05207	0.4502	0.4724	0.5694	0.1527	0.3148	0.5404	0.5058	0.6782	0.6531	0.7178	0.8085	0.7159	0.6473	0.5683	0.8207	0.8171	0.8332	0.8811	0.8392	0.8621	0.8226	0.8027	0.7969	0.8818	0.8629	0.8902	0.875	0.9062	0.9315	0.9591	0.9361	0.9337	0.9418	0.9647	0.9542	0.9848	3.717e-05
GO:0048736_appendage_development	0.0001245	0.05207	0.4502	0.4724	0.5694	0.1527	0.3148	0.5404	0.5058	0.6782	0.6531	0.7178	0.8085	0.7159	0.6473	0.5683	0.8207	0.8171	0.8332	0.8811	0.8392	0.8621	0.8226	0.8027	0.7969	0.8818	0.8629	0.8902	0.875	0.9062	0.9315	0.9591	0.9361	0.9337	0.9418	0.9647	0.9542	0.9848	3.717e-05
GO:0035113_embryonic_appendage_morphogenesis	0.00366	0.06561	0.5157	0.5637	0.6567	0.2136	0.2955	0.5444	0.5747	0.7457	0.6531	0.7167	0.8174	0.7336	0.7318	0.5921	0.8207	0.8599	0.8246	0.8694	0.8392	0.8774	0.8141	0.8015	0.7931	0.8909	0.8749	0.8968	0.8635	0.9062	0.9315	0.9591	0.93	0.9343	0.9503	0.9504	0.9489	0.9848	3.717e-05
GO:0030326_embryonic_limb_morphogenesis	0.00366	0.06561	0.5157	0.5637	0.6567	0.2136	0.2955	0.5444	0.5747	0.7457	0.6531	0.7167	0.8174	0.7336	0.7318	0.5921	0.8207	0.8599	0.8246	0.8694	0.8392	0.8774	0.8141	0.8015	0.7931	0.8909	0.8749	0.8968	0.8635	0.9062	0.9315	0.9591	0.93	0.9343	0.9503	0.9504	0.9489	0.9848	3.717e-05
GO:0009953_dorsal/ventral_pattern_formation	0.007302	0.08148	0.3274	0.5862	0.5605	0.1704	0.3912	0.6584	0.5909	0.7672	0.7788	0.7178	0.8213	0.6623	0.7677	0.6344	0.7991	0.8483	0.7892	0.8895	0.8392	0.8615	0.8065	0.7807	0.7906	0.8852	0.8844	0.8755	0.8395	0.9062	0.9331	0.9514	0.9164	0.9261	0.9298	0.9607	0.9489	0.9848	0.0001685
GO:0007492_endoderm_development	0.04801	0.2528	0.6402	0.1944	0.5743	0.1953	0.5002	0.6755	0.6431	0.4959	0.7427	0.6873	0.8069	0.6541	0.7166	0.8007	0.8207	0.7935	0.8249	0.8534	0.8392	0.8526	0.8053	0.8075	0.8029	0.8661	0.8707	0.8868	0.8623	0.8724	0.9315	0.9514	0.9165	0.9122	0.9298	0.9457	0.9489	0.9848	0.01727
GO:0030902_hindbrain_development	0.01635	0.2001	0.5198	0.2765	0.4427	0.1704	0.3977	0.724	0.6821	0.8	0.7821	0.8191	0.8655	0.6734	0.7322	0.6532	0.8136	0.8483	0.7892	0.833	0.8392	0.8726	0.8287	0.8015	0.8029	0.8615	0.8849	0.9142	0.8635	0.9083	0.9315	0.9514	0.9278	0.9343	0.9298	0.9647	0.9568	0.9848	3.717e-05
GO:0043407_negative_regulation_of_MAP_kinase_activity	0.003788	0.1724	0.4734	0.5556	0.5064	0.55	0.4798	0.4051	0.5219	0.5969	0.6078	0.4572	0.7456	0.6648	0.7322	0.6581	0.7726	0.7845	0.7571	0.7759	0.7498	0.8225	0.7319	0.7037	0.7154	0.8096	0.8317	0.847	0.8192	0.817	0.8509	0.9398	0.8982	0.9005	0.9227	0.8633	0.8594	0.9848	0.01827
GO:0010324_membrane_invagination	0.02066	0.1383	0.3362	0.5716	0.633	0.5423	0.6742	0.4354	0.4574	0.7826	0.5178	0.6189	0.7279	0.7459	0.8035	0.7906	0.7628	0.7925	0.7045	0.7853	0.7378	0.8547	0.6725	0.6665	0.7152	0.8096	0.8341	0.9008	0.7797	0.8611	0.8509	0.9514	0.8982	0.9062	0.9261	0.9229	0.8594	0.9344	0.000413
GO:0006897_endocytosis	0.02066	0.1383	0.3362	0.5716	0.633	0.5423	0.6742	0.4354	0.4574	0.7826	0.5178	0.6189	0.7279	0.7459	0.8035	0.7906	0.7628	0.7925	0.7045	0.7853	0.7378	0.8547	0.6725	0.6665	0.7152	0.8096	0.8341	0.9008	0.7797	0.8611	0.8509	0.9514	0.8982	0.9062	0.9261	0.9229	0.8594	0.9344	0.000413
GO:0055001_muscle_cell_development	0.03721	0.4123	0.4144	0.6868	0.5597	0.4752	0.4785	0.4926	0.5435	0.7493	0.6531	0.6458	0.7809	0.6523	0.7578	0.7169	0.7271	0.7659	0.7473	0.8313	0.7218	0.804	0.675	0.5898	0.7058	0.7363	0.8317	0.8755	0.7826	0.8453	0.8114	0.9398	0.8982	0.864	0.8372	0.8962	0.884	0.9848	0.08655
GO:0015674_di-,_tri-valent_inorganic_cation_transport	0.02114	0.2909	0.6718	0.599	0.4222	0.2136	0.6636	0.4583	0.5735	0.6756	0.613	0.6189	0.7565	0.5784	0.718	0.7844	0.7628	0.7694	0.7807	0.8313	0.7642	0.8757	0.7836	0.7493	0.745	0.7968	0.8341	0.9156	0.8158	0.8611	0.8959	0.9514	0.9029	0.9062	0.9286	0.9457	0.9446	0.9848	0.004746
GO:0035270_endocrine_system_development	0.002738	0.232	0.5198	0.5635	0.546	0.3419	0.6131	0.5347	0.516	0.7492	0.7051	0.6374	0.81	0.7366	0.7303	0.7544	0.8126	0.7743	0.7892	0.8326	0.7943	0.8805	0.7791	0.795	0.7931	0.8256	0.8317	0.8968	0.8407	0.8787	0.9137	0.9514	0.9165	0.9062	0.9286	0.9457	0.9482	0.9848	0.000136
GO:0001508_regulation_of_action_potential	0.0217	0.2094	0.4679	0.6937	0.5707	0.4871	0.6065	0.5698	0.6121	0.5815	0.7641	0.6857	0.7917	0.6734	0.7003	0.7468	0.815	0.8133	0.8147	0.8127	0.8386	0.8726	0.8045	0.7988	0.7848	0.8285	0.8629	0.8868	0.8517	0.8611	0.9137	0.9514	0.9164	0.9062	0.9298	0.9457	0.9466	0.9848	0.06323
GO:0030534_adult_behavior	0.04674	0.1718	0.4903	0.6714	0.5856	0.387	0.6942	0.6404	0.6284	0.6307	0.7361	0.7178	0.8174	0.7159	0.8035	0.7811	0.7795	0.7876	0.7725	0.8445	0.8181	0.8611	0.8045	0.769	0.7837	0.8192	0.8629	0.8977	0.8144	0.8456	0.9096	0.9514	0.9029	0.9062	0.9286	0.9457	0.9446	0.9848	0.002995
GO:0048701_embryonic_cranial_skeleton_morphogenesis	0.02782	0.3287	0.475	0.6915	0.5689	0.3756	0.5176	0.6735	0.5609	0.63	0.7659	0.7178	0.8164	0.6949	0.7472	0.7959	0.7741	0.7815	0.8167	0.8811	0.8392	0.8547	0.8065	0.7881	0.7969	0.8285	0.8629	0.8724	0.8635	0.8616	0.9293	0.9514	0.9164	0.9165	0.9298	0.9481	0.9482	0.9848	0.01635
GO:0006022_aminoglycan_metabolic_process	0.03914	0.3696	0.6556	0.5729	0.6309	0.5105	0.5517	0.5438	0.5087	0.6679	0.6841	0.6391	0.7456	0.7124	0.6473	0.6959	0.6803	0.719	0.7537	0.9004	0.7498	0.8086	0.7717	0.7493	0.7594	0.7269	0.8145	0.8558	0.8027	0.8611	0.8692	0.9398	0.9029	0.9005	0.9261	0.9091	0.931	0.9848	0.1208
GO:0030203_glycosaminoglycan_metabolic_process	0.03698	0.4329	0.7335	0.6117	0.6236	0.5039	0.5323	0.5967	0.5537	0.6756	0.7427	0.6805	0.7756	0.7274	0.6512	0.6949	0.7229	0.7416	0.7644	0.9004	0.7811	0.8086	0.7791	0.7493	0.7606	0.7224	0.8449	0.8755	0.8314	0.8611	0.8728	0.9407	0.9029	0.9005	0.9286	0.9277	0.9446	0.9848	0.15
GO:0051050_positive_regulation_of_transport	0.003937	0.364	0.6193	0.5174	0.3277	0.3691	0.7254	0.6417	0.4737	0.688	0.7223	0.7328	0.7917	0.6681	0.739	0.7288	0.7961	0.7659	0.7649	0.8313	0.8378	0.8086	0.7791	0.719	0.745	0.7968	0.8449	0.847	0.8381	0.8611	0.9209	0.9514	0.9029	0.9062	0.9281	0.9481	0.9446	0.9848	0.02298
GO:0046890_regulation_of_lipid_biosynthetic_process	0.04765	0.5145	0.7064	0.6335	0.4566	0.4686	0.7338	0.6921	0.5712	0.6756	0.7717	0.7459	0.8126	0.7412	0.7322	0.6606	0.7741	0.7659	0.7789	0.833	0.7979	0.8285	0.8045	0.7554	0.7606	0.7363	0.8629	0.8755	0.8144	0.8279	0.8909	0.9398	0.9029	0.9062	0.9286	0.9481	0.9446	0.9848	0.1411
GO:0019725_cellular_homeostasis	0.03183	0.2001	0.6795	0.6023	0.5215	0.7077	0.8498	0.5597	0.5435	0.6756	0.6541	0.6857	0.7974	0.6799	0.7322	0.6481	0.7552	0.7815	0.7473	0.8127	0.8181	0.8412	0.7633	0.7068	0.6818	0.8103	0.8629	0.9008	0.7893	0.8456	0.9077	0.9514	0.8982	0.9163	0.9286	0.9457	0.927	0.9848	0.01629
GO:0055082_cellular_chemical_homeostasis	0.005441	0.2507	0.8297	0.591	0.4162	0.5455	0.7956	0.6068	0.6284	0.7065	0.7223	0.7178	0.8164	0.6623	0.7214	0.7922	0.7628	0.7854	0.7789	0.8779	0.8392	0.8682	0.8045	0.7553	0.745	0.8192	0.8742	0.9018	0.8144	0.8787	0.922	0.9514	0.9029	0.9261	0.9298	0.9483	0.9466	0.9848	0.002585
GO:0006873_cellular_ion_homeostasis	0.003976	0.2531	0.8102	0.6007	0.4358	0.5827	0.8207	0.5964	0.6256	0.7211	0.7215	0.7178	0.8164	0.6832	0.7323	0.7826	0.7726	0.8028	0.7793	0.8811	0.8392	0.8733	0.8045	0.7554	0.7437	0.8256	0.8849	0.9156	0.8144	0.8787	0.9247	0.9514	0.9029	0.9261	0.9298	0.9483	0.9466	0.9848	0.002002
GO:0046883_regulation_of_hormone_secretion	0.02648	0.3545	0.8139	0.3901	0.5094	0.614	0.736	0.6402	0.5206	0.63	0.7427	0.7167	0.8099	0.811	0.7723	0.8883	0.7903	0.7285	0.7537	0.833	0.7605	0.8402	0.7429	0.7553	0.7673	0.7224	0.8449	0.8868	0.8381	0.8611	0.8509	0.9375	0.9029	0.9005	0.9166	0.9457	0.9466	0.9848	0.02677
GO:0060341_regulation_of_cellular_localization	0.03084	0.3056	0.7665	0.591	0.556	0.4314	0.6067	0.5964	0.516	0.5748	0.7442	0.6945	0.7974	0.7724	0.8035	0.8855	0.8136	0.7659	0.7537	0.833	0.8185	0.8412	0.7836	0.7554	0.7906	0.8012	0.8507	0.9008	0.8407	0.859	0.9292	0.9398	0.9164	0.9062	0.9286	0.9457	0.9466	0.9848	0.001328
GO:0035282_segmentation	0.007352	0.3056	0.5536	0.4507	0.4504	0.5663	0.5993	0.5444	0.4977	0.675	0.6476	0.7033	0.7256	0.7459	0.7322	0.7906	0.7795	0.7659	0.7789	0.8847	0.7979	0.8486	0.7791	0.7554	0.7837	0.8454	0.8229	0.8868	0.8381	0.8759	0.877	0.9514	0.9029	0.9062	0.9261	0.9457	0.9446	0.9848	0.0002466
GO:0014033_neural_crest_cell_differentiation	0.02167	0.2914	0.5569	0.3752	0.6083	0.5285	0.6976	0.5794	0.5918	0.7517	0.7185	0.7141	0.8099	0.7868	0.8523	0.8695	0.8207	0.8207	0.7892	0.9004	0.8181	0.8757	0.8045	0.7807	0.7906	0.814	0.8564	0.9156	0.8407	0.896	0.9138	0.9514	0.9164	0.9218	0.9298	0.9457	0.9482	0.9848	0.0006522
GO:0014032_neural_crest_cell_development	0.02167	0.2914	0.5569	0.3752	0.6083	0.5285	0.6976	0.5794	0.5918	0.7517	0.7185	0.7141	0.8099	0.7868	0.8523	0.8695	0.8207	0.8207	0.7892	0.9004	0.8181	0.8757	0.8045	0.7807	0.7906	0.814	0.8564	0.9156	0.8407	0.896	0.9138	0.9514	0.9164	0.9218	0.9298	0.9457	0.9482	0.9848	0.0006522
GO:0048754_branching_morphogenesis_of_a_tube	0.002487	0.2957	0.6771	0.4159	0.6008	0.5024	0.5416	0.6848	0.5431	0.7161	0.7856	0.7178	0.8174	0.7657	0.7722	0.4547	0.7975	0.8236	0.7904	0.8445	0.8392	0.8782	0.823	0.7988	0.8029	0.8714	0.8901	0.8815	0.8567	0.8877	0.9331	0.9523	0.9165	0.9374	0.9511	0.9504	0.9482	0.9848	0.0002298
GO:0001763_morphogenesis_of_a_branching_structure	0.002224	0.2909	0.7034	0.414	0.6412	0.4993	0.5823	0.6901	0.5489	0.6983	0.794	0.7167	0.8174	0.7916	0.8001	0.4547	0.815	0.8473	0.8167	0.8694	0.8392	0.8896	0.8354	0.8075	0.8081	0.8846	0.9127	0.9008	0.8635	0.885	0.9374	0.9589	0.9278	0.9374	0.9586	0.9574	0.9489	0.9848	3.717e-05
GO:0007517_muscle_organ_development	0.0009575	0.1954	0.4672	0.3381	0.3829	0.01709	0.09952	0.5212	0.484	0.5969	0.6682	0.7203	0.8099	0.4714	0.6318	0.5921	0.7685	0.719	0.777	0.8811	0.8122	0.855	0.8045	0.7592	0.7906	0.7856	0.8629	0.8868	0.8381	0.9062	0.9047	0.9514	0.9165	0.9062	0.9286	0.9614	0.9482	0.9848	3.717e-05
GO:0042127_regulation_of_cell_proliferation	6.519e-05	0.04314	0.3478	0.3012	0.4156	0.0646	0.1873	0.6435	0.581	0.5881	0.7649	0.7178	0.8174	0.6393	0.7214	0.4503	0.7986	0.7815	0.7892	0.8811	0.8526	0.8621	0.8215	0.8027	0.821	0.8852	0.8844	0.8724	0.8765	0.8787	0.9446	0.9523	0.9233	0.9343	0.9511	0.9574	0.963	0.9848	3.717e-05
GO:0048732_gland_development	0.0267	0.2816	0.09906	0.4893	0.3999	0.1311	0.3247	0.5903	0.5909	0.7314	0.7249	0.7178	0.7869	0.6623	0.6473	0.3919	0.7795	0.7815	0.7892	0.8002	0.8392	0.8547	0.8045	0.7733	0.8029	0.8285	0.8629	0.847	0.8635	0.8873	0.9209	0.9514	0.9165	0.9215	0.9298	0.9481	0.9533	0.9848	0.0002708
GO:0051216_cartilage_development	0.009384	0.2906	0.1708	0.4893	0.5325	0.08082	0.1088	0.6206	0.5671	0.5868	0.7586	0.7404	0.7869	0.6037	0.5881	0.5781	0.8385	0.7812	0.8241	0.7853	0.8392	0.8757	0.8367	0.8075	0.8439	0.8192	0.8617	0.8755	0.8976	0.9072	0.9315	0.9591	0.9367	0.9218	0.9298	0.9701	0.963	0.9848	3.717e-05
GO:0045597_positive_regulation_of_cell_differentiation	0.01635	0.09257	0.253	0.5063	0.5597	0.08557	0.1165	0.5811	0.6467	0.66	0.7586	0.7141	0.8164	0.6722	0.6842	0.5921	0.8549	0.8682	0.8415	0.8415	0.8557	0.881	0.8338	0.8393	0.8138	0.9086	0.9159	0.8755	0.8783	0.8985	0.9446	0.9591	0.9367	0.9343	0.957	0.9677	0.957	0.9848	3.717e-05
GO:0006140_regulation_of_nucleotide_metabolic_process	0.01396	0.4797	0.588	0.2153	0.455	0.1704	0.298	0.6921	0.6829	0.6213	0.7582	0.7543	0.8056	0.6623	0.7528	0.4656	0.7978	0.7848	0.7725	0.9004	0.8392	0.8532	0.8081	0.7744	0.8081	0.8285	0.8449	0.847	0.8635	0.8787	0.9209	0.9514	0.9164	0.9163	0.9298	0.9481	0.9529	0.9848	0.004518
GO:0030808_regulation_of_nucleotide_biosynthetic_process	0.02582	0.5363	0.5751	0.2246	0.4566	0.1584	0.3148	0.7276	0.7188	0.6672	0.7821	0.7743	0.8164	0.6623	0.7495	0.4715	0.8072	0.7943	0.7772	0.9025	0.8392	0.8615	0.8273	0.7839	0.834	0.8466	0.8561	0.847	0.8635	0.8918	0.9292	0.9514	0.9164	0.9252	0.9298	0.9483	0.958	0.9848	0.006209
GO:0030802_regulation_of_cyclic_nucleotide_biosynthetic_process	0.02582	0.5363	0.5751	0.2246	0.4566	0.1584	0.3148	0.7276	0.7188	0.6672	0.7821	0.7743	0.8164	0.6623	0.7495	0.4715	0.8072	0.7943	0.7772	0.9025	0.8392	0.8615	0.8273	0.7839	0.834	0.8466	0.8561	0.847	0.8635	0.8918	0.9292	0.9514	0.9164	0.9252	0.9298	0.9483	0.958	0.9848	0.006209
GO:0030799_regulation_of_cyclic_nucleotide_metabolic_process	0.01664	0.5016	0.6274	0.2622	0.4845	0.1991	0.3463	0.718	0.7151	0.659	0.7821	0.769	0.8164	0.6812	0.7764	0.5405	0.8136	0.8147	0.7807	0.9025	0.84	0.8615	0.8257	0.7921	0.8329	0.8552	0.8617	0.847	0.8635	0.8877	0.9293	0.9514	0.9164	0.927	0.9338	0.9483	0.958	0.9848	0.002706
GO:0019935_cyclic-nucleotide-mediated_signaling	0.0308	0.6605	0.4308	0.3264	0.4872	0.1359	0.1983	0.7899	0.7314	0.6756	0.8307	0.8514	0.8616	0.5905	0.7472	0.3847	0.8126	0.7746	0.7917	0.9112	0.8721	0.8733	0.8707	0.8075	0.8778	0.8285	0.8749	0.847	0.8961	0.9234	0.9446	0.9514	0.9361	0.9343	0.9511	0.9704	0.9736	0.9848	0.03844
GO:0007187_G-protein_signaling,_coupled_to_cyclic_nucleotide_second_messenger	0.0287	0.6681	0.5536	0.3218	0.5094	0.2136	0.2932	0.7842	0.7144	0.688	0.8172	0.849	0.8616	0.6648	0.7484	0.5562	0.8136	0.7659	0.7892	0.9068	0.8541	0.8683	0.8579	0.8075	0.8662	0.8165	0.8629	0.847	0.8791	0.9159	0.9446	0.9514	0.9291	0.9343	0.9445	0.9679	0.9729	0.9848	0.1058
GO:0042471_ear_morphogenesis	0.003472	0.4091	0.1708	0.6714	0.5215	0.2421	0.3352	0.734	0.6235	0.7557	0.8172	0.7656	0.8611	0.6873	0.7346	0.5781	0.7991	0.8171	0.808	0.833	0.8551	0.8547	0.8367	0.795	0.8113	0.8765	0.9159	0.8755	0.8681	0.8787	0.9315	0.9514	0.9165	0.9343	0.9382	0.9504	0.9482	0.9848	0.001023
GO:0042472_inner_ear_morphogenesis	0.01747	0.388	0.2369	0.6747	0.536	0.3059	0.385	0.7153	0.6018	0.7517	0.8068	0.7599	0.8616	0.7124	0.7495	0.5988	0.815	0.8373	0.8041	0.833	0.8508	0.8547	0.8287	0.7921	0.8029	0.8756	0.9078	0.8768	0.8635	0.8787	0.9315	0.9514	0.9165	0.9343	0.9382	0.9504	0.9482	0.9848	0.001759
GO:0043583_ear_development	0.00407	0.364	0.2462	0.6721	0.5444	0.361	0.2742	0.718	0.581	0.7453	0.8172	0.773	0.8725	0.7533	0.8016	0.5921	0.8448	0.8663	0.8432	0.8811	0.8723	0.8774	0.8532	0.8238	0.8439	0.9045	0.9333	0.8968	0.8984	0.8877	0.9446	0.9591	0.9393	0.9374	0.9605	0.9647	0.958	0.9848	0.0002466
GO:0048839_inner_ear_development	0.009499	0.3656	0.3569	0.6868	0.5643	0.4235	0.3209	0.6976	0.5565	0.7097	0.805	0.7571	0.8725	0.7518	0.8035	0.658	0.8448	0.8696	0.835	0.8665	0.8551	0.8774	0.8384	0.8075	0.8081	0.8928	0.923	0.9008	0.8856	0.8787	0.9402	0.9591	0.9386	0.9374	0.9586	0.9504	0.9489	0.9848	0.001023
GO:0019226_transmission_of_nerve_impulse	0.01638	0.2807	0.5521	0.7162	0.4587	0.2509	0.4324	0.718	0.7421	0.6672	0.8172	0.8119	0.8404	0.6963	0.7578	0.4547	0.8503	0.8516	0.8422	0.8874	0.8697	0.9023	0.8578	0.829	0.8473	0.8767	0.9181	0.9001	0.8949	0.9062	0.9452	0.9591	0.9367	0.9374	0.9503	0.9701	0.9582	0.9848	0.001023
GO:0030001_metal_ion_transport	0.007453	0.4053	0.6116	0.599	0.5094	0.1566	0.4848	0.6639	0.7185	0.675	0.797	0.7555	0.8404	0.7289	0.7578	0.6581	0.8207	0.8663	0.8522	0.9004	0.8644	0.9112	0.8716	0.8102	0.862	0.8952	0.9158	0.936	0.9069	0.9256	0.9477	0.9591	0.9449	0.9374	0.9605	0.975	0.9736	0.9848	3.717e-05
GO:0055010_ventricular_cardiac_muscle_tissue_morphogenesis	0.02671	0.1287	0.3375	0.5571	0.4859	0.5827	0.8142	0.4053	0.3931	0.7066	0.4582	0.6374	0.7256	0.7289	0.7214	0.8772	0.6947	0.719	0.6056	0.8192	0.6646	0.7779	0.6054	0.6284	0.5572	0.6114	0.8018	0.9202	0.7052	0.7599	0.7965	0.9398	0.8472	0.8969	0.9015	0.7681	0.7963	0.9848	0.02886
GO:0060627_regulation_of_vesicle-mediated_transport	0.02389	0.3696	0.5943	0.5323	0.3327	0.7282	0.8369	0.5326	0.4268	0.63	0.4747	0.6838	0.7007	0.6623	0.7591	0.9074	0.7389	0.7321	0.579	0.7759	0.7378	0.6925	0.5494	0.6284	0.5886	0.7229	0.7744	0.9156	0.6749	0.7	0.8095	0.8948	0.8316	0.8895	0.9015	0.8962	0.8505	0.9286	0.1783
GO:0006349_regulation_of_gene_expression_by_genetic_imprinting	0.007302	0.2433	0.05997	0.2936	0.6427	0.5794	0.7071	0.1887	0.3314	0.6756	0.4083	0.4551	0.6612	0.7547	0.8035	0.7896	0.7736	0.7659	0.7518	0.7865	0.5769	0.8486	0.5422	0.6589	0.5606	0.7372	0.7118	0.9156	0.7707	0.7192	0.7873	0.9398	0.8093	0.8362	0.8954	0.6339	0.7194	0.9848	0.03066
GO:0030036_actin_cytoskeleton_organization	0.01301	0.1887	0.1482	0.3912	0.4436	0.4183	0.7574	0.2581	0.3167	0.5636	0.3959	0.4903	0.7142	0.652	0.7495	0.7035	0.7628	0.7134	0.5874	0.8127	0.6014	0.7779	0.5333	0.6339	0.5865	0.7145	0.7261	0.8977	0.7356	0.7286	0.689	0.9375	0.8982	0.8777	0.8593	0.8444	0.8505	0.9848	0.0007954
GO:0030029_actin_filament-based_process	0.0116	0.2665	0.2452	0.4295	0.5217	0.5067	0.7982	0.3114	0.4	0.5727	0.4582	0.5456	0.7538	0.6995	0.7496	0.7248	0.7726	0.719	0.6397	0.8178	0.6131	0.8086	0.57	0.7037	0.6312	0.7074	0.7555	0.911	0.7707	0.7545	0.7496	0.9398	0.8982	0.8862	0.8988	0.8738	0.8975	0.9848	0.002002
GO:0016043_cellular_component_organization	0.1756	0.04065	0.02578	0.5855	0.6008	0.5669	0.8	0.3149	0.2664	0.6081	0.431	0.5681	0.6967	0.7732	0.7322	0.5238	0.7795	0.7659	0.7537	0.8445	0.6918	0.8224	0.5471	0.6988	0.6703	0.7968	0.8449	0.9008	0.8135	0.8279	0.8344	0.9514	0.8982	0.9062	0.9166	0.872	0.8464	0.9848	0.0003881
GO:0048729_tissue_morphogenesis	6.519e-05	0.003141	0.2814	0.1102	0.5694	0.4973	0.709	0.147	0.07884	0.4924	0.4789	0.3434	0.7256	0.8106	0.8016	0.9018	0.815	0.7732	0.7789	0.8211	0.7116	0.8621	0.7308	0.7493	0.7152	0.8096	0.8352	0.949	0.8381	0.8456	0.905	0.9514	0.9164	0.9122	0.9298	0.8962	0.9424	0.9848	3.717e-05
GO:0001655_urogenital_system_development	0.0001812	0.1245	0.4112	0.1772	0.6008	0.4686	0.4908	0.2626	0.2664	0.6756	0.479	0.5212	0.7256	0.8521	0.7601	0.8165	0.8245	0.7815	0.7892	0.7837	0.7498	0.8547	0.7319	0.7554	0.7336	0.8096	0.8629	0.8815	0.8394	0.8456	0.8808	0.9514	0.9164	0.9141	0.9286	0.9277	0.9265	0.9848	3.717e-05
GO:0048762_mesenchymal_cell_differentiation	0.00268	0.05029	0.4734	0.1772	0.5325	0.4038	0.5728	0.4012	0.3503	0.645	0.5306	0.6189	0.7279	0.6841	0.7472	0.7811	0.7706	0.7659	0.7518	0.8192	0.747	0.8225	0.7168	0.7553	0.7294	0.7363	0.8145	0.8582	0.8144	0.8611	0.8728	0.9398	0.9029	0.9062	0.9286	0.9091	0.9465	0.9848	0.000136
GO:0014031_mesenchymal_cell_development	0.00268	0.05029	0.4734	0.1772	0.5325	0.4038	0.5728	0.4012	0.3503	0.645	0.5306	0.6189	0.7279	0.6841	0.7472	0.7811	0.7706	0.7659	0.7518	0.8192	0.747	0.8225	0.7168	0.7553	0.7294	0.7363	0.8145	0.8582	0.8144	0.8611	0.8728	0.9398	0.9029	0.9062	0.9286	0.9091	0.9465	0.9848	0.000136
GO:0060485_mesenchyme_development	0.003875	0.09257	0.5458	0.2765	0.5909	0.4978	0.6461	0.4998	0.4122	0.688	0.6206	0.6458	0.7869	0.7366	0.7677	0.8165	0.8001	0.7808	0.78	0.813	0.7642	0.8486	0.7469	0.7704	0.7606	0.7968	0.8449	0.8755	0.8381	0.8787	0.9001	0.9514	0.9029	0.9122	0.9298	0.9308	0.9466	0.9848	0.0002466
GO:0042551_neuron_maturation	0.0267	0.2094	0.2278	0.327	0.5809	0.6652	0.6976	0.3281	0.375	0.37	0.562	0.5481	0.7411	0.7897	0.7962	0.8158	0.8207	0.7815	0.7892	0.8127	0.7556	0.8412	0.6455	0.7437	0.7154	0.8096	0.8317	0.9142	0.8381	0.8279	0.8353	0.9398	0.9029	0.9062	0.9247	0.8962	0.9008	0.9848	0.0315
GO:0016055_Wnt_receptor_signaling_pathway	0.001271	0.1171	0.2601	0.4507	0.5622	0.6206	0.7154	0.3641	0.2241	0.5969	0.482	0.5296	0.7497	0.7724	0.7707	0.8893	0.7739	0.7134	0.7793	0.7759	0.7235	0.7869	0.7168	0.7733	0.7154	0.8192	0.8229	0.8755	0.8027	0.8279	0.8959	0.9375	0.8982	0.9005	0.9015	0.8962	0.8863	0.9848	0.002995
GO:0048332_mesoderm_morphogenesis	0.002455	0.06215	0.1907	0.3314	0.5597	0.5634	0.6002	0.2647	0.09529	0.577	0.5815	0.6189	0.7769	0.8078	0.8035	0.8861	0.8002	0.7659	0.7892	0.9004	0.7378	0.8615	0.7606	0.7554	0.745	0.7897	0.8229	0.9322	0.8407	0.8456	0.8844	0.9514	0.9029	0.9062	0.9286	0.8962	0.9446	0.9848	0.001312
GO:0001704_formation_of_primary_germ_layer	0.003895	0.04172	0.3675	0.327	0.5909	0.5356	0.6206	0.2925	0.1393	0.6047	0.6081	0.6189	0.7545	0.7934	0.8001	0.901	0.7986	0.768	0.7892	0.8901	0.7406	0.8547	0.7596	0.7554	0.7513	0.7996	0.8449	0.9194	0.8381	0.8453	0.877	0.9514	0.9029	0.9062	0.9261	0.8962	0.9446	0.9848	0.003678
GO:0001707_mesoderm_formation	0.004494	0.1132	0.2238	0.4777	0.6008	0.5971	0.6461	0.3313	0.1393	0.6569	0.6531	0.64	0.8014	0.8433	0.8418	0.9007	0.8207	0.7746	0.7892	0.9025	0.7556	0.8735	0.7791	0.7702	0.7832	0.8012	0.8449	0.936	0.8454	0.8524	0.8959	0.9514	0.9164	0.9163	0.9286	0.8962	0.9466	0.9848	0.007911
GO:0040008_regulation_of_growth	0.03084	0.2833	0.3771	0.327	0.2865	0.5071	0.6071	0.3627	0.2938	0.5969	0.6025	0.6189	0.7135	0.6508	0.6325	0.7302	0.7776	0.6029	0.7793	0.7072	0.7642	0.648	0.6932	0.7493	0.7438	0.6253	0.8449	0.8755	0.8381	0.8456	0.8509	0.9063	0.9058	0.9005	0.886	0.9277	0.9465	0.9848	0.01926
GO:0008361_regulation_of_cell_size	0.01042	0.3218	0.4112	0.4475	0.3707	0.6316	0.7022	0.4765	0.2469	0.7211	0.6214	0.6189	0.7437	0.7002	0.739	0.7959	0.7978	0.6851	0.7892	0.8127	0.7201	0.7994	0.689	0.7179	0.7221	0.7224	0.8564	0.8773	0.8381	0.8456	0.8095	0.9398	0.9029	0.9005	0.8988	0.8962	0.9063	0.9848	0.05759
GO:0032012_regulation_of_ARF_protein_signal_transduction	0.002191	0.2416	0.07454	0.3752	0.5438	0.4686	0.7339	0.5029	0.3395	0.7828	0.5181	0.6525	0.7917	0.7459	0.8741	0.8075	0.7776	0.7134	0.7821	0.8834	0.6324	0.8486	0.7168	0.7628	0.7397	0.7224	0.7681	0.9202	0.8027	0.8705	0.8728	0.9514	0.9029	0.9062	0.9261	0.9457	0.8594	0.9848	0.003625
GO:0032312_regulation_of_ARF_GTPase_activity	0.007355	0.2485	0.1564	0.4301	0.4486	0.4006	0.6461	0.5998	0.484	0.7828	0.6717	0.7178	0.8099	0.7518	0.8472	0.78	0.7924	0.7694	0.7892	0.8811	0.7642	0.8547	0.804	0.795	0.7837	0.8096	0.8564	0.911	0.8381	0.8724	0.8959	0.9514	0.9162	0.9122	0.9298	0.9457	0.93	0.9848	0.004573
GO:0010646_regulation_of_cell_communication	6.519e-05	0.1086	0.03991	0.5556	0.6243	0.4686	0.706	0.5622	0.3583	0.7252	0.7223	0.7111	0.8699	0.863	0.8791	0.7614	0.8786	0.8382	0.8357	0.8948	0.8108	0.9023	0.7749	0.8015	0.7969	0.8554	0.8849	0.949	0.8791	0.885	0.9315	0.9591	0.9291	0.9374	0.9504	0.9481	0.9482	0.9848	3.717e-05
GO:0009966_regulation_of_signal_transduction	0.001271	0.2414	0.01355	0.7116	0.7454	0.655	0.7626	0.6109	0.4956	0.7889	0.7654	0.7086	0.8885	0.8965	0.9031	0.8398	0.8868	0.8663	0.8487	0.9025	0.8264	0.9035	0.7999	0.8075	0.7981	0.8852	0.9159	0.949	0.8865	0.8916	0.9339	0.9628	0.9278	0.9374	0.957	0.9457	0.9466	0.9848	3.717e-05
GO:0051056_regulation_of_small_GTPase_mediated_signal_transduction	0.0185	0.4217	0.001676	0.5171	0.6979	0.5617	0.6999	0.5831	0.5172	0.7485	0.6393	0.6845	0.8099	0.8025	0.8596	0.7544	0.8063	0.7815	0.808	0.9004	0.7642	0.8486	0.723	0.7733	0.7675	0.8466	0.8507	0.8868	0.8381	0.8611	0.8509	0.9514	0.9029	0.9062	0.9286	0.9277	0.9008	0.9848	0.01835
GO:0046578_regulation_of_Ras_protein_signal_transduction	0.03095	0.4561	0.001369	0.5652	0.7472	0.7264	0.816	0.6047	0.5359	0.7729	0.6531	0.7111	0.8164	0.8588	0.8685	0.8411	0.8136	0.7854	0.815	0.9064	0.7643	0.8615	0.7469	0.795	0.7906	0.856	0.8449	0.9018	0.8381	0.8705	0.877	0.9514	0.9029	0.9062	0.9298	0.9277	0.9166	0.9848	0.03484
GO:0031329_regulation_of_cellular_catabolic_process	0.04741	0.5004	0.1185	0.704	0.7358	0.7725	0.8976	0.6109	0.5241	0.7097	0.7361	0.6525	0.8426	0.872	0.8741	0.9267	0.825	0.7925	0.7892	0.8639	0.776	0.8733	0.7469	0.7553	0.745	0.8256	0.8629	0.9492	0.8381	0.8611	0.9138	0.9514	0.9164	0.9163	0.9286	0.8962	0.9446	0.9848	0.1481
GO:0010827_regulation_of_glucose_transport	0.02582	0.4137	0.2739	0.4891	0.6467	0.7077	0.8202	0.6871	0.5413	0.7517	0.7215	0.7571	0.8591	0.8742	0.8385	0.9014	0.8723	0.8483	0.8342	0.8876	0.807	0.885	0.7919	0.8015	0.7969	0.8554	0.8939	0.9492	0.8632	0.8787	0.9315	0.9591	0.9291	0.9343	0.9382	0.9481	0.9466	0.9848	0.002374
GO:0046324_regulation_of_glucose_import	0.03457	0.4802	0.1757	0.5733	0.7181	0.7749	0.8622	0.7009	0.5609	0.7838	0.7427	0.7656	0.87	0.9037	0.8716	0.9137	0.8917	0.8663	0.8435	0.9004	0.8191	0.9023	0.8045	0.8075	0.8029	0.8762	0.9159	0.9575	0.8635	0.885	0.9315	0.9591	0.9361	0.9374	0.9511	0.9481	0.9466	0.9848	0.005663
GO:0030111_regulation_of_Wnt_receptor_signaling_pathway	0.02218	0.06507	0.6826	0.5635	0.5689	0.5045	0.6964	0.4686	0.5399	0.6115	0.6531	0.6189	0.8174	0.765	0.7495	0.8999	0.8207	0.8161	0.7892	0.833	0.7774	0.8615	0.7429	0.795	0.7437	0.8756	0.8629	0.9117	0.8381	0.8456	0.9185	0.9514	0.9029	0.9062	0.9286	0.8962	0.9046	0.9848	0.001516
GO:0030030_cell_projection_organization	6.519e-05	0.04476	0.5053	0.2763	0.6957	0.382	0.7321	0.5509	0.5359	0.6219	0.7223	0.7141	0.8174	0.8017	0.8035	0.9014	0.8503	0.8608	0.8371	0.851	0.8386	0.9023	0.8053	0.8266	0.8081	0.8909	0.8742	0.9322	0.8949	0.885	0.9315	0.9591	0.9393	0.9374	0.9545	0.9483	0.9524	0.9848	3.717e-05
GO:0042692_muscle_cell_differentiation	0.001794	0.2466	0.3168	0.5674	0.6429	0.6403	0.6786	0.4354	0.4468	0.7453	0.633	0.6442	0.8099	0.784	0.8344	0.9074	0.8207	0.7876	0.78	0.8694	0.7556	0.855	0.7367	0.7493	0.745	0.8103	0.8629	0.9335	0.8381	0.8786	0.877	0.9514	0.9164	0.9062	0.9261	0.9308	0.9446	0.9848	3.717e-05
GO:0001822_kidney_development	0.003472	0.2724	0.3776	0.4916	0.7198	0.7205	0.6461	0.4381	0.4361	0.7588	0.6206	0.6458	0.8164	0.9125	0.8665	0.9031	0.8919	0.8538	0.8241	0.8624	0.8181	0.8967	0.7962	0.8024	0.7906	0.8852	0.9115	0.9197	0.8635	0.8611	0.9247	0.9589	0.9181	0.9343	0.9338	0.9457	0.9465	0.9848	3.717e-05
GO:0007498_mesoderm_development	0.001794	0.2001	0.384	0.5637	0.6485	0.5777	0.5624	0.303	0.2454	0.7161	0.6614	0.6374	0.8164	0.8433	0.8385	0.8596	0.8207	0.7876	0.8166	0.9106	0.7979	0.8994	0.8139	0.7806	0.7931	0.8466	0.8564	0.936	0.8682	0.8877	0.9315	0.9591	0.9291	0.9255	0.9298	0.9457	0.9489	0.9848	0.000413
GO:0007369_gastrulation	0.01134	0.0682	0.3874	0.6348	0.7181	0.6709	0.6742	0.4497	0.3524	0.7635	0.7215	0.6525	0.8426	0.8931	0.9002	0.9127	0.8549	0.8663	0.8399	0.9181	0.8181	0.9023	0.8139	0.8075	0.7906	0.8964	0.8863	0.9492	0.8651	0.8787	0.9315	0.9591	0.9181	0.9343	0.9356	0.9308	0.9466	0.9848	0.0002466
GO:0001825_blastocyst_formation	0.008937	0.364	0.6008	0.7163	0.4989	0.4235	0.7386	0.5597	0.6256	0.6756	0.7059	0.6525	0.8085	0.7459	0.812	0.867	0.8486	0.7887	0.7892	0.8313	0.793	0.8757	0.7605	0.7807	0.7848	0.8096	0.8629	0.9194	0.8381	0.8456	0.908	0.9514	0.9164	0.9122	0.9286	0.9287	0.9466	0.9848	0.06335
GO:0001829_trophectodermal_cell_differentiation	0.02337	0.3696	0.5841	0.7449	0.5094	0.4235	0.7557	0.566	0.6431	0.6756	0.7187	0.6682	0.8056	0.7469	0.8129	0.867	0.8503	0.8053	0.7904	0.8334	0.7979	0.8757	0.7606	0.7881	0.7848	0.8096	0.8742	0.9156	0.8394	0.8491	0.908	0.9514	0.9164	0.9122	0.9286	0.9277	0.9466	0.9848	0.09264
GO:0000188_inactivation_of_MAPK_activity	0.007352	0.3656	0.6465	0.6894	0.5597	0.6501	0.7321	0.5698	0.6467	0.7065	0.7249	0.6334	0.8099	0.7641	0.8365	0.8308	0.8245	0.8483	0.7892	0.833	0.8182	0.8682	0.7836	0.7744	0.7906	0.8852	0.8629	0.8977	0.8482	0.8456	0.9123	0.9514	0.9137	0.9163	0.9286	0.9206	0.9446	0.9848	0.1971
GO:0060537_muscle_tissue_development	0.03178	0.364	0.4015	0.7021	0.6531	0.5067	0.6461	0.5326	0.5797	0.7485	0.6541	0.7184	0.8174	0.7668	0.8323	0.8011	0.8491	0.8445	0.7904	0.8951	0.8076	0.8804	0.7717	0.7733	0.7513	0.8728	0.8904	0.9322	0.8394	0.8845	0.9001	0.9591	0.9164	0.9252	0.9286	0.9457	0.9465	0.9848	3.717e-05
GO:0014706_striated_muscle_tissue_development	0.02687	0.364	0.4112	0.7392	0.6926	0.5609	0.6627	0.5287	0.5752	0.7453	0.6682	0.7178	0.8174	0.7759	0.8402	0.8154	0.8503	0.8483	0.7911	0.8897	0.8122	0.885	0.7717	0.7733	0.7513	0.8756	0.8934	0.9335	0.8406	0.8787	0.9008	0.9591	0.9165	0.9218	0.9286	0.9457	0.9466	0.9848	3.717e-05
GO:0060538_skeletal_muscle_organ_development	0.02154	0.5069	0.5006	0.7131	0.7158	0.6257	0.7338	0.5543	0.5939	0.6799	0.7223	0.7171	0.8269	0.816	0.8435	0.8317	0.8798	0.848	0.8371	0.9004	0.8357	0.9023	0.823	0.8075	0.8029	0.8852	0.9005	0.9202	0.8783	0.8963	0.9209	0.9591	0.9386	0.93	0.9298	0.9483	0.9489	0.9848	0.0001063
GO:0007519_skeletal_muscle_tissue_development	0.02154	0.5069	0.5006	0.7131	0.7158	0.6257	0.7338	0.5543	0.5939	0.6799	0.7223	0.7171	0.8269	0.816	0.8435	0.8317	0.8798	0.848	0.8371	0.9004	0.8357	0.9023	0.823	0.8075	0.8029	0.8852	0.9005	0.9202	0.8783	0.8963	0.9209	0.9591	0.9386	0.93	0.9298	0.9483	0.9489	0.9848	0.0001063
GO:0032350_regulation_of_hormone_metabolic_process	0.007313	0.4996	0.4687	0.6512	0.7085	0.6025	0.6742	0.6469	0.5909	0.7457	0.797	0.792	0.8616	0.8211	0.8579	0.8154	0.8385	0.8563	0.8157	0.9004	0.8392	0.9023	0.8413	0.8075	0.834	0.8846	0.8904	0.9284	0.8662	0.8611	0.9315	0.9591	0.9291	0.9374	0.9508	0.9481	0.958	0.9848	0.01446
GO:0009649_entrainment_of_circadian_clock	0.04585	0.4932	0.5597	0.7018	0.705	0.7059	0.8072	0.5811	0.5435	0.8009	0.7368	0.7033	0.8695	0.8563	0.8988	0.9238	0.8398	0.8382	0.7892	0.8811	0.7642	0.9023	0.8053	0.7866	0.7931	0.8699	0.8629	0.949	0.8406	0.8611	0.9247	0.9591	0.9165	0.9374	0.9261	0.9457	0.9466	0.9848	0.08466
GO:0043405_regulation_of_MAP_kinase_activity	0.04765	0.4217	0.5569	0.8188	0.7013	0.6914	0.6989	0.6404	0.6821	0.6533	0.7752	0.6525	0.8446	0.8232	0.8719	0.8692	0.8503	0.8862	0.8167	0.8265	0.8392	0.8955	0.823	0.7866	0.7906	0.8909	0.9159	0.9226	0.8635	0.8457	0.9292	0.9514	0.9164	0.9343	0.9503	0.9457	0.8864	0.9848	0.02807
GO:0042391_regulation_of_membrane_potential	0.03393	0.1718	0.3524	0.8282	0.7252	0.6817	0.6681	0.6203	0.6821	0.7593	0.7919	0.7178	0.8688	0.7817	0.8579	0.7896	0.8779	0.8857	0.8357	0.9004	0.8495	0.9112	0.823	0.8075	0.7906	0.8909	0.9159	0.949	0.8635	0.8975	0.9446	0.9628	0.9165	0.9374	0.9605	0.9483	0.9466	0.9848	0.002706
GO:0035239_tube_morphogenesis	0.0009575	0.1939	0.6673	0.542	0.6967	0.6652	0.7671	0.6147	0.5241	0.6672	0.7953	0.6682	0.8434	0.8433	0.8507	0.7896	0.8448	0.8503	0.8173	0.8811	0.8392	0.9023	0.8367	0.8027	0.8029	0.8852	0.9186	0.936	0.8635	0.885	0.9446	0.9591	0.9291	0.9374	0.9586	0.9504	0.9482	0.9848	0.0002466
GO:0060429_epithelium_development	0.002424	0.2822	0.762	0.5637	0.7667	0.7336	0.8235	0.6109	0.601	0.6925	0.7919	0.64	0.8303	0.8914	0.8811	0.9005	0.8985	0.8857	0.8432	0.8829	0.8392	0.9097	0.8505	0.8244	0.8209	0.9156	0.9192	0.949	0.8882	0.8975	0.9446	0.9628	0.9367	0.9374	0.9605	0.9483	0.9489	0.9848	0.0002298
GO:0002009_morphogenesis_of_an_epithelium	0.002424	0.2822	0.762	0.5637	0.7667	0.7336	0.8235	0.6109	0.601	0.6925	0.7919	0.64	0.8303	0.8914	0.8811	0.9005	0.8985	0.8857	0.8432	0.8829	0.8392	0.9097	0.8505	0.8244	0.8209	0.9156	0.9192	0.949	0.8882	0.8975	0.9446	0.9628	0.9367	0.9374	0.9605	0.9483	0.9489	0.9848	0.0002298
GO:0006464_protein_modification_process	0.7829	0.4426	0.0001893	0.7473	0.7224	0.8911	0.8976	0.5388	0.6558	0.7457	0.7223	0.6374	0.8164	0.9321	0.925	0.9267	0.9033	0.9057	0.8449	0.8895	0.793	0.9023	0.7429	0.7988	0.7832	0.9171	0.9078	0.9498	0.848	0.8524	0.8997	0.9514	0.9029	0.9215	0.8843	0.8589	0.8103	0.4589	0.3607
GO:0043412_macromolecule_modification	0.7879	0.5123	0.0001893	0.8073	0.4992	0.8911	0.8976	0.5675	0.6824	0.791	0.7562	0.6805	0.8354	0.9321	0.9279	0.9267	0.9052	0.9097	0.8582	0.9004	0.8046	0.9126	0.7791	0.8075	0.7906	0.9191	0.9233	0.9559	0.8635	0.8611	0.9096	0.9591	0.905	0.93	0.8863	0.8894	0.8464	0.402	0.4508
GO:0043687_post-translational_protein_modification	0.6432	0.434	0.0001893	0.7183	0.8508	0.8911	0.8976	0.5404	0.6375	0.7453	0.7223	0.6525	0.8174	0.9321	0.922	0.9267	0.9037	0.9043	0.8522	0.8811	0.7979	0.9023	0.7469	0.8027	0.7848	0.9156	0.9217	0.9559	0.8635	0.8611	0.905	0.9523	0.9164	0.9261	0.9298	0.8962	0.8594	0.7832	0.2312
GO:0006909_phagocytosis	0.03639	0.4137	0.5333	0.4847	0.5918	0.4339	0.6211	0.6921	0.6821	0.7097	0.6682	0.7178	0.7343	0.7518	0.7683	0.6581	0.8001	0.848	0.787	0.8445	0.8378	0.8548	0.8065	0.7738	0.8029	0.8846	0.8646	0.847	0.846	0.8611	0.8963	0.9514	0.9164	0.9062	0.9298	0.9457	0.9466	0.9848	0.00227
GO:0021799_cerebral_cortex_radially_oriented_cell_migration	0.02635	0.4723	0.3729	0.6439	0.6037	0.4871	0.5953	0.7422	0.6822	0.7485	0.797	0.7739	0.8511	0.7169	0.7484	0.767	0.8136	0.8478	0.8144	0.8688	0.8392	0.8774	0.823	0.8075	0.8021	0.8713	0.8849	0.8959	0.8635	0.8786	0.9315	0.9514	0.9165	0.93	0.9338	0.9483	0.9482	0.9848	0.2635
GO:0042474_middle_ear_morphogenesis	0.0449	0.5768	0.5751	0.6849	0.6037	0.4235	0.5617	0.7475	0.6986	0.742	0.8147	0.7588	0.8164	0.721	0.7322	0.6865	0.7924	0.7815	0.8058	0.8583	0.8392	0.8486	0.8139	0.7943	0.8029	0.8611	0.8849	0.847	0.8563	0.8616	0.928	0.9514	0.905	0.9125	0.9286	0.9481	0.9466	0.9848	0.1366
GO:0006029_proteoglycan_metabolic_process	0.01818	0.4399	0.6274	0.7044	0.7202	0.4029	0.5663	0.7069	0.6485	0.754	0.8172	0.7812	0.8616	0.7923	0.7578	0.6581	0.8352	0.8473	0.8157	0.9004	0.8392	0.8804	0.8455	0.8096	0.8081	0.8446	0.9159	0.8868	0.8635	0.8876	0.9315	0.9589	0.9278	0.929	0.9298	0.9481	0.9485	0.9848	0.157
GO:0008544_epidermis_development	0.02782	0.5262	0.8057	0.562	0.4162	0.4533	0.5416	0.7368	0.6675	0.7876	0.797	0.8394	0.8404	0.7149	0.7484	0.7544	0.8136	0.7921	0.7807	0.9004	0.8392	0.8733	0.8135	0.7733	0.8021	0.7968	0.8844	0.9156	0.8454	0.9083	0.9315	0.9589	0.9291	0.9349	0.9382	0.9701	0.9529	0.9848	0.04046
GO:0030005_cellular_di-,_tri-valent_inorganic_cation_homeostasis	0.02113	0.5314	0.7039	0.591	0.4342	0.2687	0.6742	0.7341	0.726	0.7308	0.798	0.7898	0.8426	0.6209	0.7322	0.7544	0.7628	0.8382	0.7807	0.9004	0.8516	0.8682	0.8378	0.7733	0.7931	0.8466	0.9035	0.8755	0.8454	0.9083	0.9315	0.9514	0.9164	0.9343	0.9298	0.9701	0.9568	0.9848	0.02152
GO:0055066_di-,_tri-valent_inorganic_cation_homeostasis	0.02218	0.5317	0.7777	0.6261	0.4183	0.3264	0.7366	0.7422	0.743	0.7453	0.8172	0.8119	0.8611	0.6648	0.7322	0.7811	0.7739	0.844	0.7882	0.9025	0.8643	0.8726	0.8406	0.7771	0.8026	0.8466	0.9159	0.8902	0.8586	0.9159	0.9315	0.9589	0.9165	0.9374	0.938	0.9701	0.958	0.9848	0.01143
GO:0035272_exocrine_system_development	0.03216	0.2805	0.7517	0.7076	0.6514	0.6008	0.6461	0.6971	0.6431	0.7453	0.7946	0.7178	0.8404	0.7465	0.8583	0.78	0.8207	0.8483	0.7892	0.8694	0.8392	0.8682	0.8053	0.7866	0.7906	0.8798	0.8863	0.9156	0.8422	0.8786	0.9315	0.9514	0.9164	0.927	0.9298	0.9481	0.9466	0.9848	0.03147
GO:0031016_pancreas_development	0.03514	0.2138	0.779	0.7133	0.6658	0.5402	0.6091	0.7384	0.7435	0.7844	0.7962	0.7599	0.8655	0.7373	0.8612	0.8695	0.8207	0.8857	0.8173	0.907	0.8508	0.9023	0.8565	0.8034	0.8102	0.9156	0.8742	0.9322	0.8635	0.9083	0.9446	0.9591	0.93	0.9261	0.9468	0.9618	0.958	0.9848	0.000492
GO:0051179_localization	0.007907	0.3623	0.5827	0.7545	0.7164	0.4722	0.6902	0.6848	0.6639	0.7457	0.797	0.7505	0.8426	0.8535	0.8716	0.7354	0.8745	0.8811	0.8173	0.9106	0.8392	0.9169	0.8045	0.8034	0.8029	0.8852	0.9159	0.9492	0.8662	0.9159	0.9292	0.9628	0.9367	0.9374	0.9505	0.9632	0.9489	0.9848	3.717e-05
GO:0022603_regulation_of_anatomical_structure_morphogenesis	0.01648	0.3541	0.6596	0.7206	0.7252	0.4542	0.57	0.7258	0.7141	0.6782	0.8172	0.7622	0.8738	0.8433	0.8435	0.8714	0.9009	0.8914	0.8851	0.9025	0.8824	0.9104	0.8707	0.8707	0.862	0.9191	0.9307	0.936	0.9155	0.8877	0.9523	0.9648	0.9533	0.9374	0.9636	0.9701	0.9736	0.9848	3.717e-05
GO:0006812_cation_transport	0.02571	0.4682	0.6964	0.7053	0.5744	0.353	0.5663	0.7252	0.7546	0.6782	0.818	0.765	0.8655	0.7477	0.8082	0.7386	0.8207	0.8857	0.8488	0.9064	0.8721	0.919	0.8813	0.8075	0.8564	0.9052	0.9197	0.945	0.8984	0.9234	0.9482	0.9628	0.9421	0.9374	0.9622	0.9769	0.9736	0.9848	0.0004684
GO:0006811_ion_transport	0.0002757	0.4681	0.6662	0.6894	0.5694	0.3858	0.5764	0.749	0.7455	0.6756	0.8637	0.7889	0.8806	0.748	0.8272	0.8165	0.8245	0.8857	0.8488	0.9025	0.8825	0.919	0.8889	0.8324	0.8662	0.9052	0.9336	0.949	0.9069	0.9322	0.9482	0.9628	0.9538	0.939	0.9639	0.986	0.9736	0.9848	0.000136
GO:0048545_response_to_steroid_hormone_stimulus	0.02783	0.4976	0.7001	0.5389	0.5608	0.4871	0.5032	0.724	0.6821	0.7509	0.797	0.8402	0.8725	0.872	0.8716	0.7221	0.8893	0.8516	0.8435	0.9081	0.8392	0.9023	0.8338	0.8288	0.8512	0.8621	0.9159	0.945	0.8984	0.9106	0.9446	0.9591	0.9421	0.9374	0.9382	0.9677	0.9736	0.9848	0.0002466
GO:0031099_regeneration	0.004885	0.5024	0.6855	0.6533	0.5652	0.4235	0.5192	0.8069	0.7388	0.791	0.8684	0.8478	0.898	0.821	0.8297	0.6888	0.8793	0.8446	0.8432	0.9106	0.8824	0.9023	0.8635	0.8639	0.8686	0.8713	0.9159	0.9289	0.9126	0.9322	0.9468	0.9591	0.9492	0.939	0.9605	0.9784	0.9736	0.9848	0.004953
GO:0001568_blood_vessel_development	0.01621	0.4561	0.5717	0.6894	0.6008	0.5004	0.45	0.803	0.7042	0.7361	0.8267	0.8514	0.866	0.8941	0.8435	0.7916	0.8549	0.8894	0.8194	0.9095	0.8721	0.8955	0.8338	0.8075	0.8029	0.8914	0.9381	0.9345	0.8806	0.9062	0.9376	0.9628	0.935	0.939	0.9636	0.9728	0.9568	0.9848	3.717e-05
GO:0001944_vasculature_development	0.0267	0.4835	0.5988	0.7131	0.6329	0.528	0.5046	0.8253	0.7388	0.7612	0.844	0.8726	0.8732	0.9074	0.8649	0.8249	0.8786	0.8995	0.8401	0.9212	0.8824	0.9023	0.8455	0.8251	0.8375	0.9085	0.9464	0.945	0.8984	0.9124	0.9446	0.9648	0.9393	0.9429	0.9667	0.9785	0.9607	0.9848	3.717e-05
GO:0005976_polysaccharide_metabolic_process	0.02167	0.4496	0.7111	0.6868	0.7274	0.7264	0.6837	0.6561	0.5951	0.693	0.7702	0.7302	0.8164	0.8391	0.7318	0.6908	0.7986	0.7845	0.8098	0.9112	0.828	0.8682	0.823	0.7988	0.8081	0.8411	0.8629	0.8681	0.8635	0.8963	0.9247	0.9514	0.9164	0.7313	0.9382	0.9457	0.9466	0.9848	0.1522
GO:0019218_regulation_of_steroid_metabolic_process	0.005404	0.6265	0.5865	0.7418	0.7422	0.7843	0.7498	0.6882	0.5609	0.7358	0.8169	0.7471	0.8231	0.8991	0.8344	0.7989	0.8245	0.8229	0.7936	0.8677	0.8182	0.8757	0.823	0.7988	0.7931	0.8256	0.9013	0.8976	0.8429	0.8294	0.908	0.9514	0.9164	0.9215	0.9298	0.9457	0.9466	0.9848	0.06769
GO:0055075_potassium_ion_homeostasis	0.03	0.6425	0.7784	0.733	0.6979	0.7762	0.5626	0.6756	0.6447	0.7588	0.7962	0.7459	0.8404	0.8944	0.8739	0.7021	0.8448	0.8392	0.8157	0.8811	0.7979	0.8896	0.8065	0.8015	0.7969	0.8696	0.8807	0.8991	0.85	0.8456	0.9001	0.9514	0.9164	0.9261	0.9298	0.9429	0.9466	0.9848	0.4095
GO:0050654_chondroitin_sulfate_proteoglycan_metabolic_process	0.02067	0.3751	0.7517	0.6868	0.7482	0.5467	0.8393	0.6903	0.6978	0.7181	0.797	0.7555	0.8174	0.7897	0.7764	0.8861	0.8207	0.8382	0.8168	0.9004	0.8392	0.8733	0.8194	0.8025	0.8029	0.8447	0.8629	0.8887	0.8635	0.889	0.928	0.9514	0.9165	0.9163	0.9298	0.9481	0.9489	0.9848	0.1944
GO:0030204_chondroitin_sulfate_metabolic_process	0.02635	0.3696	0.8079	0.7603	0.7231	0.6149	0.8607	0.7029	0.7057	0.7497	0.8083	0.7743	0.8308	0.7492	0.8148	0.8803	0.815	0.8503	0.8144	0.9081	0.8392	0.8774	0.823	0.8015	0.8029	0.8756	0.8719	0.9197	0.8635	0.8933	0.9315	0.9591	0.9181	0.9252	0.9356	0.9526	0.9482	0.9848	0.1805
GO:0007512_adult_heart_development	0.01643	0.5024	0.7227	0.75	0.6957	0.6249	0.7254	0.7381	0.7336	0.7991	0.8126	0.7416	0.8725	0.8285	0.8719	0.9003	0.8207	0.8538	0.7934	0.9085	0.8515	0.8994	0.8257	0.8075	0.8154	0.8852	0.9159	0.9289	0.8635	0.8877	0.9446	0.9591	0.9165	0.9343	0.9487	0.9483	0.9489	0.9848	0.1702
GO:0001756_somitogenesis	0.04801	0.5254	0.7778	0.733	0.6401	0.746	0.7513	0.7025	0.6821	0.7997	0.7919	0.7836	0.8231	0.863	0.8523	0.8999	0.8413	0.8413	0.7892	0.9161	0.8392	0.9023	0.8384	0.8027	0.8138	0.8909	0.8629	0.9202	0.8635	0.9062	0.9315	0.9591	0.9165	0.9261	0.9298	0.9484	0.9489	0.9848	0.03365
GO:0001656_metanephros_development	0.04371	0.4338	0.7217	0.5637	0.65	0.6141	0.6574	0.7067	0.6284	0.8033	0.7856	0.7599	0.8404	0.8829	0.8646	0.8216	0.8786	0.8547	0.8371	0.8534	0.8392	0.8955	0.8378	0.8075	0.8138	0.8852	0.9159	0.9221	0.8856	0.8787	0.9421	0.9591	0.9291	0.9374	0.9568	0.9495	0.9466	0.9848	0.0005336
GO:0009719_response_to_endogenous_stimulus	0.02218	0.3541	0.8057	0.527	0.6404	0.55	0.6461	0.6882	0.6284	0.7497	0.7958	0.8299	0.8647	0.8898	0.8402	0.8398	0.9033	0.8516	0.8663	0.9064	0.8392	0.9023	0.8274	0.8494	0.8662	0.8738	0.8939	0.9409	0.9155	0.9159	0.9331	0.9591	0.9449	0.9374	0.9511	0.9647	0.9736	0.9848	0.004518
GO:0009725_response_to_hormone_stimulus	0.04649	0.4905	0.8533	0.6272	0.7181	0.6652	0.709	0.733	0.6848	0.7991	0.8267	0.8525	0.9022	0.9129	0.8804	0.8695	0.9127	0.8857	0.8846	0.9337	0.8643	0.9187	0.8669	0.8697	0.8805	0.8909	0.9307	0.949	0.927	0.9316	0.9468	0.9628	0.9616	0.939	0.9605	0.9701	0.9736	0.9848	0.005093
GO:0044057_regulation_of_system_process	6.519e-05	0.4242	0.8895	0.6587	0.6008	0.4235	0.6763	0.7166	0.6704	0.7485	0.8172	0.8314	0.8905	0.876	0.8583	0.9031	0.8786	0.8516	0.8256	0.9212	0.8592	0.9185	0.8707	0.8344	0.8515	0.8729	0.9159	0.949	0.8984	0.9159	0.9482	0.9628	0.9492	0.9374	0.9605	0.9701	0.9736	0.9848	3.717e-05
GO:0006937_regulation_of_muscle_contraction	0.00772	0.6253	0.8344	0.7131	0.5141	0.6783	0.7373	0.692	0.6821	0.7751	0.7763	0.7617	0.8341	0.7657	0.7495	0.8007	0.8207	0.7812	0.787	0.851	0.8181	0.8611	0.8081	0.7776	0.7931	0.7794	0.8617	0.8755	0.8454	0.8611	0.8959	0.9514	0.9164	0.9062	0.9261	0.9457	0.9466	0.9848	0.1081
GO:0009612_response_to_mechanical_stimulus	0.0342	0.5943	0.8304	0.6015	0.5734	0.5617	0.6961	0.7769	0.7546	0.8316	0.8634	0.8692	0.8905	0.797	0.8547	0.7789	0.8643	0.8939	0.8357	0.8785	0.8721	0.9097	0.8707	0.8388	0.8595	0.8852	0.9369	0.9376	0.8918	0.9256	0.9482	0.9628	0.9386	0.9429	0.9605	0.9785	0.9607	0.9848	0.07897
GO:0007565_female_pregnancy	0.0473	0.6414	0.7652	0.7438	0.5739	0.5948	0.6002	0.7853	0.767	0.8387	0.8698	0.8478	0.8968	0.8472	0.8804	0.7844	0.8757	0.8906	0.8371	0.9004	0.8757	0.9023	0.8716	0.8096	0.8662	0.8852	0.9301	0.9356	0.8984	0.9083	0.9457	0.9591	0.9361	0.9374	0.9605	0.9701	0.963	0.9848	0.01681
GO:0009075_histidine_family_amino_acid_metabolic_process	0.03	0.7353	0.8824	0.886	0.8531	0.7652	0.7442	0.8768	0.8357	0.8797	0.8963	0.8959	0.9098	0.903	0.9135	0.4547	0.8825	0.9077	0.8501	0.9391	0.8835	0.9308	0.8937	0.8366	0.8736	0.9191	0.9346	0.945	0.9054	0.9159	0.9482	0.9693	0.9393	0.9374	0.9636	0.9785	0.9607	0.9848	0.5201
GO:0006547_histidine_metabolic_process	0.03	0.7353	0.8824	0.886	0.8531	0.7652	0.7442	0.8768	0.8357	0.8797	0.8963	0.8959	0.9098	0.903	0.9135	0.4547	0.8825	0.9077	0.8501	0.9391	0.8835	0.9308	0.8937	0.8366	0.8736	0.9191	0.9346	0.945	0.9054	0.9159	0.9482	0.9693	0.9393	0.9374	0.9636	0.9785	0.9607	0.9848	0.5201
GO:0009077_histidine_family_amino_acid_catabolic_process	0.0364	0.6782	0.8895	0.8765	0.8605	0.8213	0.8498	0.8667	0.8357	0.8677	0.8887	0.8712	0.906	0.9116	0.91	0.7614	0.8798	0.9043	0.8432	0.9198	0.8825	0.931	0.8926	0.8494	0.8662	0.9191	0.9307	0.9492	0.8768	0.9234	0.9482	0.9692	0.9367	0.9374	0.9636	0.9729	0.9568	0.9848	0.3165
GO:0006548_histidine_catabolic_process	0.0364	0.6782	0.8895	0.8765	0.8605	0.8213	0.8498	0.8667	0.8357	0.8677	0.8887	0.8712	0.906	0.9116	0.91	0.7614	0.8798	0.9043	0.8432	0.9198	0.8825	0.931	0.8926	0.8494	0.8662	0.9191	0.9307	0.9492	0.8768	0.9234	0.9482	0.9692	0.9367	0.9374	0.9636	0.9729	0.9568	0.9848	0.3165
GO:0043536_positive_regulation_of_blood_vessel_endothelial_cell_migration	0.0421	0.5987	0.3799	0.7425	0.8094	0.8172	0.8184	0.6936	0.661	0.7364	0.7962	0.7332	0.8616	0.9148	0.9002	0.9014	0.883	0.8857	0.8399	0.8811	0.8392	0.8757	0.8139	0.8075	0.8029	0.9052	0.9285	0.945	0.8843	0.8611	0.9315	0.9514	0.9196	0.9343	0.9508	0.9457	0.9466	0.9848	0.07217
GO:0032270_positive_regulation_of_cellular_protein_metabolic_process	0.01464	0.5643	0.3734	0.7701	0.7934	0.8566	0.8976	0.7249	0.6821	0.7953	0.794	0.7268	0.8685	0.9116	0.8961	0.9018	0.8779	0.8753	0.8191	0.8833	0.8191	0.9023	0.7962	0.804	0.8021	0.8852	0.9159	0.949	0.8507	0.8724	0.9293	0.9589	0.9164	0.9261	0.9365	0.9457	0.9466	0.9848	0.163
GO:0051247_positive_regulation_of_protein_metabolic_process	0.02635	0.6493	0.3771	0.8356	0.8329	0.8772	0.8976	0.773	0.7336	0.8547	0.833	0.7809	0.9022	0.928	0.9155	0.8972	0.8989	0.8995	0.8501	0.9025	0.8392	0.9166	0.823	0.8251	0.8213	0.9156	0.9356	0.9518	0.8768	0.8985	0.9446	0.9628	0.9181	0.9374	0.9586	0.9483	0.9482	0.9848	0.2185
GO:0051174_regulation_of_phosphorus_metabolic_process	0.01227	0.4443	0.2814	0.8864	0.7541	0.8175	0.8687	0.7475	0.6963	0.8006	0.8609	0.7622	0.905	0.9168	0.9158	0.9267	0.8956	0.8857	0.8371	0.9198	0.8643	0.9185	0.8384	0.833	0.8081	0.9085	0.9369	0.9559	0.9085	0.9062	0.9482	0.9675	0.9363	0.939	0.9636	0.9618	0.958	0.9848	0.0929
GO:0019220_regulation_of_phosphate_metabolic_process	0.01227	0.4443	0.2814	0.8864	0.7541	0.8175	0.8687	0.7475	0.6963	0.8006	0.8609	0.7622	0.905	0.9168	0.9158	0.9267	0.8956	0.8857	0.8371	0.9198	0.8643	0.9185	0.8384	0.833	0.8081	0.9085	0.9369	0.9559	0.9085	0.9062	0.9482	0.9675	0.9363	0.939	0.9636	0.9618	0.958	0.9848	0.0929
GO:0042325_regulation_of_phosphorylation	0.007496	0.4637	0.2885	0.8876	0.7878	0.832	0.8871	0.7475	0.7124	0.819	0.8643	0.7695	0.905	0.9207	0.9184	0.9267	0.8985	0.8911	0.8399	0.9201	0.8647	0.919	0.8452	0.8344	0.8151	0.9152	0.9369	0.9577	0.909	0.9083	0.9482	0.9679	0.9367	0.939	0.9636	0.962	0.958	0.9848	0.09581
GO:0051270_regulation_of_cellular_component_movement	0.007254	0.2909	0.5155	0.654	0.7454	0.7779	0.8583	0.7551	0.6748	0.7244	0.8004	0.8001	0.87	0.9245	0.8892	0.9193	0.8786	0.8911	0.8603	0.9004	0.8541	0.8999	0.8384	0.8281	0.8335	0.9144	0.9369	0.949	0.8984	0.9062	0.9421	0.9591	0.9291	0.9374	0.9605	0.9647	0.9533	0.9848	3.717e-05
GO:0030334_regulation_of_cell_migration	0.03088	0.4426	0.6574	0.7888	0.8389	0.8715	0.8972	0.8158	0.7546	0.8166	0.8579	0.8489	0.9049	0.9321	0.9252	0.9267	0.9093	0.9132	0.8868	0.9268	0.8832	0.919	0.8707	0.8649	0.8564	0.926	0.9469	0.9596	0.9154	0.9234	0.9482	0.9693	0.9421	0.9429	0.9682	0.9701	0.963	0.9848	3.717e-05
GO:0007264_small_GTPase_mediated_signal_transduction	0.1118	0.4463	0.002395	0.7354	0.7892	0.8911	0.8976	0.6921	0.6431	0.8287	0.7787	0.8123	0.8743	0.9314	0.9182	0.9267	0.9033	0.8939	0.8399	0.9231	0.8392	0.9097	0.8053	0.8249	0.7931	0.8937	0.9333	0.9606	0.85	0.8787	0.9293	0.9591	0.9165	0.9374	0.9444	0.9457	0.9465	0.9848	0.001296
GO:0006468_protein_amino_acid_phosphorylation	0.275	0.5392	0.01407	0.7849	0.849	0.8392	0.8976	0.724	0.7455	0.7876	0.8264	0.7555	0.881	0.9318	0.9181	0.9267	0.9052	0.9132	0.8868	0.9064	0.8428	0.9185	0.8384	0.8494	0.8335	0.9222	0.9369	0.959	0.8976	0.8958	0.9315	0.9628	0.9291	0.9379	0.9605	0.9457	0.9466	0.9848	0.1446
GO:0046626_regulation_of_insulin_receptor_signaling_pathway	0.3133	0.5251	0.02821	0.8385	0.7869	0.8693	0.8976	0.7475	0.7331	0.8879	0.8172	0.7836	0.905	0.9192	0.9173	0.8897	0.9033	0.901	0.8753	0.9081	0.8523	0.9276	0.8428	0.8481	0.8451	0.9148	0.9159	0.9596	0.8791	0.9083	0.9482	0.965	0.9361	0.939	0.9636	0.9504	0.9466	0.9848	0.3094
GO:0006796_phosphate_metabolic_process	0.4471	0.606	0.02821	0.8332	0.8736	0.8911	0.8976	0.7477	0.7844	0.8117	0.8698	0.7543	0.9049	0.9321	0.9276	0.9267	0.9127	0.9236	0.893	0.9095	0.8551	0.9251	0.8609	0.8625	0.8512	0.9323	0.9369	0.9606	0.9069	0.9083	0.9446	0.964	0.9367	0.941	0.9636	0.9457	0.9482	0.9848	0.3022
GO:0006793_phosphorus_metabolic_process	0.4471	0.606	0.02821	0.8332	0.8736	0.8911	0.8976	0.7477	0.7844	0.8117	0.8698	0.7543	0.9049	0.9321	0.9276	0.9267	0.9127	0.9236	0.893	0.9095	0.8551	0.9251	0.8609	0.8625	0.8512	0.9323	0.9369	0.9606	0.9069	0.9083	0.9446	0.964	0.9367	0.941	0.9636	0.9457	0.9482	0.9848	0.3022

## Sheet: Table S9B
Table S9B. Significant GO nodes of the first five overrepresented motifs correlated with cell type specific and ubiquitous CTCF binding sites across 38 cell types
Description	C1	C38	C33	C18	C37	C26	C32	C29	C3	C8	C31	C27	C5	C30	C28	C6	C13	C9	C7	C2	C36	C10	C35	C23	C21	C15	C25	C34	C16	C14	C22	C24	C19	C20	C4	C12	C11	C17	Ubiquitous
GO:0007608_sensory_perception_of_smell	0.002482	0.001235	0.003312	0.003322	0.003321	0.001987	0.008504	0.2415	0.001411	0.002492	0.00332	0.003321	0.003321	0.003706	0.001995	0.003314	0.002479	0.003316	0.003315	0.003322	0.003311	0.00141	0.003306	0.003314	0.003316	0.003311	0.002488	0.003307	0.002485	0.00331	0.003323	0.00332	0.003306	0.003328	0.02549	0.003311	0.003315	0.003316	0.003328
GO:0007606_sensory_perception_of_chemical_stimulus	0.002482	0.001235	0.003312	0.003322	0.003321	0.001987	0.001654	0.2415	0.001411	0.002492	0.00332	0.003321	0.003321	0.003706	0.001995	0.003314	0.002479	0.003316	0.003315	0.003322	0.003311	0.00141	0.003306	0.003314	0.003316	0.003311	0.002488	0.003307	0.002485	0.00331	0.003323	0.00332	0.003306	0.003328	0.04473	0.003311	0.003315	0.003316	0.003328
GO:0010467_gene_expression	0.001239	0.001235	0.00639	0.001969	0.001659	0.0002984	0.001415	0.001652	0.001411	0.001232	0.001409	0.002475	0.0008254	0.001651	0.04964	0.002467	0.00198	0.005978	0.001416	0.002484	0.003311	0.00329	0.002465	0.002455	0.001229	0.00109	0.001961	0.001225	0.003697	0.001651	0.003305	0.0007047	0.001099	0.002599	0.001227	0.0006728	0.003245	0.0008207	0.001653
GO:0006412_translation	0.001239	0.001235	0.003976	0.004594	0.001659	0.0002984	0.001415	0.001414	0.001411	0.005309	0.001409	0.02219	0.0008254	0.001651	0.1311	0.002467	0.00198	0.003279	0.001416	0.003608	0.01049	0.01316	0.001972	0.002455	0.001229	0.00109	0.001961	0.001225	0.002485	0.001651	0.004957	0.001409	0.001099	0.002599	0.001227	0.0009755	0.003245	0.0008207	0.02425
GO:0006396_RNA_processing	0.001239	0.0429	0.04247	0.001641	0.0199	0.0002984	0.001415	0.06555	0.009155	0.001232	0.001409	0.002475	0.008527	0.00619	0.08024	0.04486	0.02773	0.005978	0.001416	0.002835	0.003311	0.004936	0.003287	0.01964	0.001229	0.002675	0.003268	0.001633	0.06281	0.03797	0.007932	0.0007047	0.001099	0.002599	0.0206	0.01022	0.003245	0.002273	0.002834
GO:0006414_translational_elongation	0.006308	0.002475	0.04247	0.07391	0.008846	0.0002984	0.06828	0.001414	0.009876	0.004993	0.07447	0.03687	0.006632	0.02471	0.05561	0.03886	0.02762	0.03161	0.008813	0.003608	0.1176	0.01316	0.022	0.04233	0.007148	0.00109	0.0268	0.002262	0.02196	0.01541	0.0301	0.01972	0.00424	0.002599	0.001227	0.006233	0.01833	0.001989	0.1746
GO:0008380_RNA_splicing	0.001239	0.2581	0.01218	0.01261	0.0199	0.0002984	0.001415	0.06184	0.007935	0.006901	0.001317	0.006187	0.03979	0.00619	0.006553	0.1184	0.05086	0.003321	0.005577	0.002835	0.004967	0.01247	0.05975	0.05968	0.001229	0.01731	0.2096	0.07742	0.01315	0.08184	0.009915	0.001741	0.003298	0.009217	0.01983	0.003843	0.0005159	0.004634	0.188
GO:0006139_nucleobase,_nucleoside,_nucleotide_and_nucleic_acid_metabolic_process	0.02068	0.0429	0.01242	0.004632	0.01629	0.0002984	0.01679	0.06936	0.01241	0.02191	0.01276	0.0045	0.001101	0.09042	0.002457	0.09129	0.03061	0.03155	0.00778	0.01075	0.03057	0.009871	0.04602	0.1663	0.001229	0.01349	0.02124	0.001225	0.07525	0.1148	0.04363	0.0007047	0.004732	0.01941	0.001227	0.002744	0.009505	0.08526	0.3745
GO:0016070_RNA_metabolic_process	0.03587	0.0602	0.06238	0.002272	0.03428	0.0002984	0.001415	0.1507	0.007941	0.001232	0.001852	0.0033	0.0834	0.04669	0.05794	0.09129	0.03656	0.003321	0.001803	0.005512	0.004967	0.008884	0.06629	0.2144	0.009829	0.002675	0.04386	0.0434	0.06181	0.1808	0.0479	0.0007047	0.001099	0.002599	0.008282	0.0006728	0.001225	0.003283	0.02425
GO:0000398_nuclear_mRNA_splicing,_via_spliceosome	0.01108	0.4106	0.0004682	0.0053	0.2169	0.0002984	0.001415	0.1385	0.007935	0.02813	0.01669	0.01654	0.07378	0.05227	0.08024	0.04891	0.003715	0.02839	0.006601	0.00372	0.005349	0.01316	0.1549	0.2049	0.05078	0.08538	0.3031	0.3586	0.01315	0.06748	0.01145	0.005083	0.00636	0.001229	0.05476	0.01613	0.0005159	0.007735	0.1751
GO:0000377_RNA_splicing,_via_transesterification_reactions_with_bulged_adenosine_as_nucleophile	0.01108	0.4106	0.0004682	0.0053	0.2169	0.0002984	0.001415	0.1385	0.007935	0.02813	0.01669	0.01654	0.07378	0.05227	0.08024	0.04891	0.003715	0.02839	0.006601	0.00372	0.005349	0.01316	0.1549	0.2049	0.05078	0.08538	0.3031	0.3586	0.01315	0.06748	0.01145	0.005083	0.00636	0.001229	0.05476	0.01613	0.0005159	0.007735	0.1751
GO:0000375_RNA_splicing,_via_transesterification_reactions	0.01108	0.4106	0.0004682	0.0053	0.2169	0.0002984	0.001415	0.1385	0.007935	0.02813	0.01669	0.01654	0.07378	0.05227	0.08024	0.04891	0.003715	0.02839	0.006601	0.00372	0.005349	0.01316	0.1549	0.2049	0.05078	0.08538	0.3031	0.3586	0.01315	0.06748	0.01145	0.005083	0.00636	0.001229	0.05476	0.01613	0.0005159	0.007735	0.1751
GO:0006397_mRNA_processing	0.006372	0.4047	0.05494	0.09646	0.09325	0.0002984	0.001415	0.2466	0.007935	0.01025	0.01276	0.01866	0.2206	0.04669	0.0486	0.1151	0.02394	0.02839	0.003301	0.002835	0.004967	0.01316	0.1266	0.2049	0.01404	0.0255	0.3173	0.1105	0.0311	0.1148	0.03877	0.004341	0.01331	0.01202	0.03195	0.01431	0.01833	0.01279	0.2123
GO:0016071_mRNA_metabolic_process	0.03023	0.4165	0.01551	0.04875	0.08421	0.0002984	0.001415	0.3011	0.009155	0.009859	0.001317	0.0126	0.232	0.09042	0.01966	0.06453	0.05478	0.03558	0.003814	0.003608	0.004967	0.01049	0.1479	0.1652	0.03194	0.01853	0.3978	0.1116	0.03332	0.1794	0.04238	0.00296	0.003298	0.02847	0.02116	0.0006728	0.000891	0.008137	0.1339
GO:0006807_nitrogen_compound_metabolic_process	0.06399	0.1715	0.1433	0.0053	0.115	0.0002984	0.02127	0.2606	0.01241	0.08151	0.07447	0.0045	0.002085	0.2363	0.01106	0.1853	0.2233	0.1104	0.01511	0.007087	0.1318	0.008974	0.1152	0.2624	0.01442	0.0331	0.03554	0.05073	0.1212	0.3106	0.07977	0.002192	0.01762	0.0383	0.01935	0.01756	0.0294	0.1709	0.5447
GO:0007600_sensory_perception	0.002482	0.2137	0.01821	0.07688	0.04982	0.001987	0.5421	0.2865	0.04734	0.002492	0.01245	0.007472	0.132	0.5098	0.001995	0.05744	0.1325	0.004975	0.04476	0.0299	0.02838	0.00141	0.08217	0.3552	0.03979	0.07379	0.1483	0.062	0.1392	0.09931	0.04414	0.0249	0.03844	0.1473	0.6341	0.2396	0.221	0.0829	0.004993
GO:0008152_metabolic_process	0.00213	0.2932	0.0001893	0.001641	0.5057	0.0002984	0.001415	0.06555	0.00772	0.007512	0.0007598	0.005775	0.001101	0.09691	0.02556	0.06143	0.1131	0.03161	0.005577	0.00372	0.004967	0.01426	0.249	0.2624	0.1617	0.02529	0.1223	0.1105	0.003697	0.02391	0.02399	0.0007047	0.001099	0.001229	0.0007011	0.0004645	0.005227	0.0008207	0.307
GO:0044237_cellular_metabolic_process	4.072e-05	0.2935	0.0001893	0.001208	0.4687	0.0002984	0.01621	0.1647	0.009155	0.006901	0.0007598	0.01866	0.0008254	0.1077	0.006553	0.02698	0.3349	0.03341	0.01745	0.01176	0.02732	0.02086	0.3354	0.4999	0.3131	0.04225	0.08979	0.3755	0.007171	0.02391	0.03175	0.0007047	0.001979	0.001229	0.0007011	0.0004645	0.002352	0.0008207	0.6261
GO:0044238_primary_metabolic_process	7.319e-05	0.4335	0.0001893	0.001641	0.5752	0.0002984	0.01752	0.3011	0.009155	0.006901	0.0007598	0.02234	0.001101	0.2517	0.05561	0.1545	0.1131	0.03341	0.01107	0.004085	0.03193	0.01758	0.3538	0.4484	0.3388	0.05819	0.2096	0.2143	0.003697	0.02391	0.0301	0.0007047	0.001099	0.001229	0.0007011	0.0004645	0.0028	0.0008207	0.3745
GO:0000245_spliceosome_assembly	0.5789	0.2386	0.1799	0.1202	0.07245	0.002483	0.02681	0.2415	0.009155	0.04651	0.3192	0.03226	0.2043	0.1174	0.05579	0.007693	0.02394	0.01769	0.003301	0.006266	0.04015	0.1585	0.4859	0.3428	0.391	0.02402	0.5421	0.3493	0.003697	0.0312	0.01145	0.08228	0.02166	0.002107	0.04427	0.1467	0.1427	0.05121	0.2222
GO:0006413_translational_initiation	0.207	0.301	0.08718	0.09043	0.08552	0.05857	0.2826	0.02249	0.1998	0.08161	0.06273	0.04112	0.0388	0.2113	0.4811	0.007693	0.06312	0.03161	0.1233	0.01111	0.03338	0.09709	0.1934	0.305	0.1456	0.07995	0.2251	0.2162	0.01315	0.1148	0.02399	0.03207	0.03282	0.02914	0.1279	0.02251	0.03846	0.06732	0.2123
GO:0032981_mitochondrial_respiratory_chain_complex_I_assembly	0.09171	0.3931	0.02784	0.03456	0.1071	0.09697	0.02541	0.04558	0.1562	0.05437	0.1239	0.1341	0.02457	0.03176	0.04566	0.08699	0.2195	0.07959	0.1248	0.07403	0.1664	0.01777	0.1328	0.2677	0.09685	0.1383	0.1568	0.1027	0.09989	0.1184	0.1701	0.1552	0.1979	0.1647	0.2247	0.1948	0.1845	0.1492	0.05769
GO:0010257_NADH_dehydrogenase_complex_assembly	0.09171	0.3931	0.02784	0.03456	0.1071	0.09697	0.02541	0.04558	0.1562	0.05437	0.1239	0.1341	0.02457	0.03176	0.04566	0.08699	0.2195	0.07959	0.1248	0.07403	0.1664	0.01777	0.1328	0.2677	0.09685	0.1383	0.1568	0.1027	0.09989	0.1184	0.1701	0.1552	0.1979	0.1647	0.2247	0.1948	0.1845	0.1492	0.05769
GO:0006282_regulation_of_DNA_repair	0.07181	0.171	0.1077	0.1116	0.05428	0.04814	0.1426	0.0995	0.1494	0.09938	0.06273	0.09996	0.06506	0.09691	0.1791	0.06626	0.1345	0.1211	0.1595	0.1145	0.1838	0.04797	0.1072	0.2205	0.1568	0.188	0.1856	0.2375	0.3522	0.229	0.112	0.08236	0.3146	0.1988	0.07814	0.221	0.07875	0.1353	0.5341
GO:0045739_positive_regulation_of_DNA_repair	0.05797	0.4047	0.1194	0.1321	0.1303	0.1843	0.1251	0.1377	0.1179	0.0802	0.03989	0.1019	0.04794	0.08742	0.2105	0.1665	0.1537	0.181	0.1513	0.08246	0.1842	0.1964	0.1072	0.2094	0.1515	0.1012	0.09788	0.1835	0.3038	0.1609	0.1261	0.04163	0.2746	0.1877	0.1351	0.2831	0.1146	0.2414	0.3745
GO:0045851_pH_reduction	0.01052	0.2954	0.2731	0.03455	0.03991	0.03106	0.114	0.1853	0.1112	0.04246	0.02153	0.0502	0.06459	0.03789	0.3894	0.04857	0.02762	0.03943	0.07894	0.06436	0.07646	0.07141	0.08065	0.05662	0.09685	0.1516	0.09652	0.0424	0.08898	0.08264	0.05812	0.05428	0.01937	0.0586	0.2592	0.1209	0.1031	0.2162	0.3092
GO:0051452_intracellular_pH_reduction	0.01506	0.2367	0.3543	0.07265	0.06422	0.09298	0.3154	0.3011	0.1349	0.06012	0.03769	0.07239	0.1398	0.05657	0.4493	0.07437	0.0351	0.06977	0.1233	0.07485	0.1026	0.1303	0.1072	0.1002	0.1332	0.188	0.09788	0.1037	0.1656	0.1335	0.1114	0.102	0.05569	0.1048	0.3142	0.2143	0.1031	0.4969	0.4572
GO:0030641_regulation_of_cellular_pH	0.06284	0.4075	0.3524	0.07975	0.1793	0.03133	0.05787	0.1503	0.3648	0.1941	0.08703	0.2045	0.3513	0.2484	0.3648	0.08718	0.06367	0.0819	0.1554	0.1173	0.1847	0.2092	0.1622	0.132	0.3782	0.3609	0.3403	0.1361	0.2007	0.1609	0.1873	0.1268	0.0678	0.2309	0.2053	0.1495	0.1241	0.5306	0.1751
GO:0070584_mitochondrion_morphogenesis	0.06846	0.101	0.1396	0.5188	0.3276	0.05409	0.06828	0.1377	0.03913	0.4074	0.1394	0.2445	0.08754	0.04809	0.01474	0.1145	0.06554	0.03985	0.0905	0.4353	0.2411	0.146	0.1088	0.0441	0.1493	0.02493	0.2506	0.3608	0.1582	0.1211	0.1196	0.1492	0.147	0.09214	0.08401	0.09405	0.07368	0.1396	0.2222
GO:0048522_positive_regulation_of_cellular_process	4.072e-05	6.519e-05	0.001167	0.0003536	0.0004683	0.000197	0.0002025	0.01138	0.0007599	0.0007359	0.002292	0.01082	0.003585	0.00934	0.2468	0.0269	0.01151	0.03943	0.04798	0.009322	0.04205	0.009598	0.03553	0.05662	0.004728	0.0891	0.009588	0.1361	0.08898	0.1123	0.1149	0.2112	0.2088	0.1877	0.3252	0.229	0.3507	0.9848	3.717e-05
GO:0048518_positive_regulation_of_biological_process	4.072e-05	6.519e-05	0.001856	0.0003536	0.0004683	0.000197	0.0002025	0.001653	0.0007599	0.0007359	0.002292	0.01082	0.003107	0.003113	0.04039	0.04259	0.02762	0.06939	0.07894	0.009322	0.04205	0.02026	0.03553	0.05662	0.004728	0.0891	0.009588	0.1723	0.1412	0.1526	0.1296	0.2744	0.2746	0.237	0.2453	0.229	0.4042	0.9848	3.717e-05
GO:0007420_brain_development	4.072e-05	6.519e-05	0.002224	0.0003536	0.0007995	0.000197	0.0002025	0.01395	0.0007599	0.0007359	0.002619	0.01082	0.004883	0.00934	0.02668	0.04857	0.02762	0.03943	0.04798	0.02581	0.05447	0.02026	0.04675	0.1002	0.04918	0.03182	0.07511	0.1619	0.3016	0.1526	0.2552	0.2606	0.442	0.1549	0.3259	0.197	0.3507	0.9848	3.717e-05
GO:0007417_central_nervous_system_development	4.072e-05	6.519e-05	0.00116	0.0003536	0.0007995	0.000197	0.0002025	0.007451	0.0007599	0.0007359	0.002619	0.01082	0.002663	0.003113	0.01655	0.04857	0.03004	0.0819	0.07227	0.02581	0.04205	0.007199	0.03553	0.1002	0.004728	0.004773	0.08218	0.2185	0.3038	0.1718	0.2955	0.5055	0.5133	0.1819	0.2453	0.1772	0.5979	0.9848	3.717e-05
GO:0034660_ncRNA_metabolic_process	0.3843	0.1514	0.4266	0.0485	0.4696	0.3362	0.4109	0.2606	0.04734	0.01858	0.1059	0.02234	0.1172	0.3713	0.8218	0.2971	0.03631	0.3656	0.03081	0.2717	0.6166	0.08252	0.04579	0.2624	0.05818	0.06897	0.01743	0.04377	0.1788	0.3352	0.3947	0.1066	0.1622	0.02847	0.3354	0.5159	0.1246	0.2218	0.611
GO:0007271_synaptic_transmission,_cholinergic	0.008326	0.06632	0.5191	0.03881	0.1342	0.4342	0.3446	0.5176	0.3002	0.1631	0.1514	0.168	0.0495	0.4059	0.4547	0.1551	0.07847	0.1271	0.244	0.4477	0.3157	0.4035	0.1591	0.1095	0.183	0.1915	0.2374	0.1723	0.3334	0.5086	0.3655	0.2744	0.3315	0.2937	0.8343	0.5267	0.3507	0.8344	0.1385
GO:0016052_carbohydrate_catabolic_process	0.08284	0.1514	0.767	0.4989	0.3038	0.4293	0.5151	0.3678	0.1309	0.4243	0.1516	0.3929	0.2792	0.2954	0.4811	0.1853	0.05478	0.04629	0.2348	0.4353	0.2173	0.478	0.3876	0.2144	0.04119	0.2988	0.0268	0.2704	0.09015	0.2758	0.3054	0.1278	0.1076	0.655	0.1901	0.1964	0.2335	0.08764	0.1751
GO:0050890_cognition	0.02708	0.4955	0.08383	0.2563	0.2006	0.0149	0.5245	0.1803	0.2135	0.01994	0.1594	0.1341	0.1758	0.5765	0.008752	0.1879	0.4624	0.1085	0.1248	0.08194	0.1742	0.001974	0.4291	0.636	0.2019	0.2833	0.3708	0.2278	0.5124	0.2984	0.2442	0.1552	0.2718	0.2978	0.8713	0.5762	0.6197	0.3992	0.05769
GO:0044260_cellular_macromolecule_metabolic_process	4.072e-05	0.4269	0.0001893	0.001969	0.3097	0.0002984	0.02462	0.3011	0.02424	0.005309	0.0007598	0.05435	0.0008254	0.3148	0.1057	0.07161	0.3988	0.1273	0.1069	0.08146	0.03643	0.02735	0.4492	0.7419	0.5325	0.1993	0.5082	0.4966	0.03332	0.05056	0.05021	0.0007047	0.003298	0.002599	0.0007011	0.0004645	0.0005159	0.0008207	0.7123
GO:0034960_cellular_macromolecule_metabolic_process	4.072e-05	0.4578	0.0001893	0.002272	0.4135	0.0002984	0.01743	0.4036	0.0624	0.005309	0.0007598	0.1576	0.001101	0.3244	0.1143	0.1684	0.459	0.1795	0.1219	0.1312	0.02821	0.0181	0.509	0.77	0.5911	0.1957	0.6151	0.502	0.1053	0.05182	0.09757	0.0007047	0.004166	0.002599	0.0007011	0.0004645	0.0005159	0.0008207	0.7205
GO:0043170_macromolecule_metabolic_process	0.0004891	0.4054	0.0001893	0.0053	0.3558	0.0002984	0.02998	0.2854	0.04414	0.006901	0.0007598	0.09883	0.01415	0.3459	0.4164	0.1484	0.3349	0.1339	0.1219	0.04447	0.05774	0.06847	0.4975	0.6793	0.541	0.3433	0.4809	0.3697	0.02301	0.0641	0.05821	0.0007047	0.003298	0.01347	0.0007011	0.0004645	0.000891	0.0008207	0.5593
GO:0043283_macromolecule_metabolic_process	7.319e-05	0.4562	0.0001893	0.0053	0.4726	0.0002984	0.03755	0.3933	0.06669	0.006901	0.0007598	0.1576	0.04457	0.3713	0.473	0.1853	0.39	0.1669	0.2044	0.06653	0.03193	0.03518	0.509	0.7419	0.6555	0.3965	0.6458	0.4205	0.03759	0.08699	0.05153	0.0007047	0.003298	0.0127	0.0007011	0.0004645	0.0028	0.0008207	0.6889
GO:0000279_M_phase	0.2826	0.7824	0.0874	0.02897	0.709	0.06018	0.1666	0.1088	0.2612	0.09925	0.04809	0.5065	0.5339	0.5098	0.3986	0.297	0.1375	0.008734	0.1507	0.2701	0.1954	0.02942	0.3884	0.3927	0.5844	0.264	0.3681	0.3641	0.03484	0.05056	0.04353	0.02161	0.02166	0.01406	0.1523	0.05784	0.271	0.2957	0.214
GO:0022618_ribonucleoprotein_complex_assembly	0.4387	0.5257	0.02495	0.4377	0.2435	0.05857	0.1149	0.4036	0.04553	0.08151	0.4644	0.05435	0.5536	0.4118	0.113	0.02803	0.2572	0.2786	0.2376	0.06524	0.2686	0.2173	0.3852	0.5757	0.6101	0.394	0.7118	0.5843	0.08297	0.296	0.06772	0.5354	0.1568	0.01229	0.1279	0.1283	0.05754	0.2837	0.2046
GO:0034961_cellular_macromolecule_biosynthetic_process	0.199	0.03033	0.04272	0.3065	0.03428	0.02019	0.01189	0.08114	0.009876	0.1164	0.1359	0.5456	0.0008254	0.1175	0.7051	0.2052	0.2606	0.1481	0.1069	0.4151	0.2686	0.1161	0.2248	0.3499	0.2019	0.09527	0.146	0.08553	0.09989	0.342	0.1603	0.1242	0.1106	0.07174	0.02208	0.03886	0.1246	0.1934	0.7123
GO:0043284_macromolecule_biosynthetic_process	0.1643	0.04609	0.06292	0.2923	0.03428	0.02292	0.01743	0.08114	0.01058	0.136	0.1698	0.5485	0.0008254	0.1518	0.7208	0.2269	0.2981	0.1777	0.1197	0.4295	0.371	0.1217	0.3095	0.3552	0.2975	0.145	0.1486	0.07742	0.09989	0.4034	0.2093	0.1705	0.1451	0.07174	0.02603	0.05735	0.1499	0.2194	0.7302
GO:0034645_cellular_macromolecule_biosynthetic_process	0.2991	0.05094	0.08556	0.1819	0.1164	0.02532	0.01189	0.08114	0.02469	0.1179	0.03166	0.5479	0.0008254	0.09691	0.8218	0.3225	0.4116	0.2436	0.1433	0.4042	0.409	0.2201	0.2525	0.3552	0.2975	0.2842	0.1568	0.4424	0.09989	0.5757	0.2442	0.01516	0.06947	0.07213	0.01097	0.01352	0.1021	0.03816	0.5593
GO:0009059_macromolecule_biosynthetic_process	0.3163	0.0602	0.114	0.3001	0.139	0.09747	0.02127	0.09895	0.03239	0.2853	0.06185	0.5508	0.0008254	0.1638	0.8943	0.4333	0.4748	0.3454	0.1507	0.4582	0.5316	0.4034	0.3319	0.4437	0.4116	0.4529	0.2275	0.521	0.1265	0.647	0.2884	0.06468	0.1231	0.0828	0.05	0.04103	0.1909	0.09161	0.7123
GO:0045893_positive_regulation_of_transcription,_DNA-dependent	4.072e-05	6.519e-05	0.001167	0.0003536	0.0009257	0.000197	0.0002025	0.01159	0.0007599	0.0007359	0.002292	0.01082	0.003585	0.00934	0.212	0.06935	0.02762	0.0819	0.1233	0.01398	0.05447	0.007199	0.04675	0.1045	0.09457	0.188	0.09652	0.3239	0.1151	0.2552	0.3655	0.3064	0.501	0.6573	0.3402	0.3019	0.5017	0.9848	3.717e-05
GO:0051254_positive_regulation_of_RNA_metabolic_process	4.072e-05	6.519e-05	0.001369	0.0003536	0.0009257	0.000197	0.0003713	0.01054	0.0007599	0.0007359	0.002619	0.02104	0.004195	0.00934	0.2113	0.07437	0.03375	0.0819	0.1513	0.01398	0.05447	0.009598	0.04675	0.1138	0.09685	0.1927	0.09788	0.3449	0.1419	0.3135	0.4223	0.3582	0.5029	0.673	0.3546	0.3687	0.5215	0.9848	3.717e-05
GO:0045935_positive_regulation_of_nucleobase,_nucleoside,_nucleotide_and_nucleic_acid_metabolic_process	4.072e-05	6.519e-05	0.002224	0.0006314	0.0009257	0.000197	0.0004609	0.009574	0.008582	0.0009813	0.002619	0.02447	0.006095	0.00934	0.1453	0.06415	0.02762	0.0819	0.1233	0.02097	0.0794	0.02026	0.07602	0.1372	0.09457	0.188	0.09788	0.3431	0.2093	0.2539	0.4174	0.2744	0.442	0.6573	0.3355	0.5267	0.404	0.9848	3.717e-05
GO:0051173_positive_regulation_of_nitrogen_compound_metabolic_process	4.072e-05	6.519e-05	0.002341	0.0006314	0.0009257	0.000197	0.0005941	0.009688	0.008704	0.001472	0.002619	0.02636	0.006095	0.00934	0.1182	0.06935	0.02762	0.08886	0.1233	0.02581	0.07805	0.02176	0.07602	0.1372	0.09457	0.188	0.1059	0.3621	0.2189	0.2661	0.4978	0.3064	0.501	0.6573	0.3362	0.5267	0.4273	0.9848	3.717e-05
GO:0010557_positive_regulation_of_macromolecule_biosynthetic_process	4.072e-05	6.519e-05	0.0106	0.001911	0.001759	0.000197	0.002391	0.02675	0.01115	0.002473	0.002865	0.02525	0.00956	0.00934	0.3419	0.099	0.02762	0.1271	0.138	0.02581	0.08328	0.007199	0.09935	0.2094	0.09457	0.188	0.1198	0.5109	0.2965	0.3523	0.4313	0.3215	0.5133	0.673	0.4077	0.5267	0.5129	0.9848	3.717e-05
GO:0031325_positive_regulation_of_cellular_metabolic_process	4.072e-05	6.519e-05	0.001369	0.01035	0.001759	0.000197	0.003737	0.06172	0.01292	0.003785	0.005979	0.02641	0.04151	0.03183	0.4089	0.099	0.03004	0.1271	0.1233	0.06436	0.1026	0.02176	0.1238	0.2094	0.09685	0.188	0.1892	0.5109	0.2714	0.3895	0.5388	0.2792	0.5029	0.673	0.5114	0.5356	0.4273	0.9848	3.717e-05
GO:0045941_positive_regulation_of_transcription	4.072e-05	6.519e-05	0.001676	0.00272	0.001759	0.000197	0.001828	0.02744	0.01195	0.0009813	0.002865	0.02636	0.009321	0.01588	0.3247	0.09708	0.03467	0.1206	0.1554	0.02581	0.1026	0.02176	0.09863	0.2205	0.1332	0.2512	0.1892	0.5109	0.3038	0.4106	0.5974	0.3713	0.5363	0.6921	0.5114	0.5993	0.4634	0.9848	3.717e-05
GO:0031326_regulation_of_cellular_biosynthetic_process	4.072e-05	6.519e-05	0.0001893	0.003624	0.001759	0.000197	0.0004609	0.004675	0.008549	0.001394	0.003209	0.03194	0.01902	0.05101	0.3704	0.168	0.03467	0.1884	0.1878	0.06826	0.1646	0.07199	0.2408	0.2499	0.1608	0.3108	0.2579	0.5769	0.3038	0.299	0.6694	0.3327	0.6352	0.6591	0.4228	0.6331	0.6344	0.9848	3.717e-05
GO:0009889_regulation_of_biosynthetic_process	4.072e-05	6.519e-05	0.0001893	0.004661	0.001759	0.000197	0.0004609	0.004675	0.008612	0.0009813	0.003209	0.03194	0.01902	0.05101	0.3578	0.168	0.03467	0.1899	0.1878	0.06826	0.1646	0.07359	0.2432	0.2499	0.1608	0.3108	0.2579	0.5769	0.3038	0.3005	0.6703	0.3327	0.6352	0.6642	0.4228	0.6331	0.6335	0.9848	3.717e-05
GO:0051960_regulation_of_nervous_system_development	4.072e-05	6.519e-05	0.002341	0.0003536	0.001319	0.000197	0.0003713	0.001653	0.0007599	0.001472	0.01025	0.02906	0.004195	0.00934	0.06769	0.137	0.1122	0.1794	0.244	0.066	0.1026	0.06927	0.06977	0.1041	0.09685	0.1915	0.09788	0.3462	0.3038	0.5757	0.6041	0.4878	0.5402	0.673	0.3259	0.5356	0.451	0.9848	3.717e-05
GO:0060284_regulation_of_cell_development	4.072e-05	6.519e-05	0.0004682	0.002326	0.001759	0.000197	0.0002025	0.0004274	0.002104	0.003785	0.02012	0.02864	0.006559	0.01588	0.03853	0.1906	0.1879	0.2604	0.4252	0.1004	0.1847	0.2173	0.09863	0.2205	0.1608	0.3336	0.2251	0.5424	0.3847	0.6572	0.6721	0.5458	0.6352	0.7074	0.3362	0.6331	0.6335	0.9848	3.717e-05
GO:0009891_positive_regulation_of_biosynthetic_process	4.072e-05	6.519e-05	0.03159	0.003929	0.003104	0.000197	0.001828	0.01795	0.01844	0.007359	0.01025	0.05683	0.01758	0.01259	0.1851	0.168	0.06519	0.2569	0.236	0.06436	0.1026	0.02176	0.1072	0.2205	0.09685	0.1915	0.2251	0.5604	0.3038	0.5086	0.6289	0.5458	0.6308	0.7061	0.3546	0.5837	0.6922	0.9848	3.717e-05
GO:0031328_positive_regulation_of_cellular_biosynthetic_process	4.072e-05	6.519e-05	0.03159	0.003817	0.003328	0.000197	0.001828	0.01785	0.01759	0.00785	0.01025	0.05888	0.01758	0.01362	0.1791	0.168	0.07199	0.2604	0.244	0.0644	0.1026	0.02176	0.1072	0.2205	0.09685	0.1961	0.2251	0.5617	0.3038	0.523	0.6492	0.5458	0.6308	0.7074	0.3546	0.5879	0.713	0.9848	3.717e-05
GO:0010628_positive_regulation_of_gene_expression	4.072e-05	6.519e-05	0.01136	0.00442	0.003328	0.000197	0.002005	0.02568	0.01368	0.003785	0.007257	0.03194	0.01785	0.02242	0.3535	0.1551	0.06312	0.184	0.244	0.06059	0.1584	0.03893	0.1176	0.2499	0.1608	0.3108	0.2374	0.5604	0.3418	0.5403	0.654	0.5914	0.6352	0.7105	0.6249	0.6349	0.6344	0.9848	3.717e-05
GO:0045944_positive_regulation_of_transcription_from_RNA_polymerase_II_promoter	4.072e-05	6.519e-05	0.008943	0.004066	0.001986	0.000197	0.0004609	0.01159	0.02615	0.003785	0.01025	0.04882	0.02065	0.02428	0.212	0.2825	0.154	0.3143	0.3394	0.06436	0.1622	0.05165	0.1142	0.2679	0.1608	0.3336	0.2251	0.583	0.4572	0.5757	0.6492	0.6817	0.6816	0.7105	0.4913	0.6331	0.8103	0.9848	3.717e-05
GO:0051171_regulation_of_nitrogen_compound_metabolic_process	4.072e-05	6.519e-05	0.0001893	0.0003536	0.01438	0.000197	0.0002025	0.003548	0.01207	0.006462	0.007334	0.1302	0.009321	0.02428	0.2758	0.204	0.07847	0.2604	0.4427	0.07857	0.1842	0.1508	0.2062	0.3055	0.2366	0.431	0.4503	0.583	0.3786	0.4106	0.7198	0.6436	0.6542	0.673	0.3916	0.6349	0.6482	0.9848	3.717e-05
GO:0019219_regulation_of_nucleobase,_nucleoside,_nucleotide_and_nucleic_acid_metabolic_process	4.072e-05	6.519e-05	0.0001893	0.0006314	0.01551	0.000197	0.0002025	0.003548	0.01306	0.006462	0.00753	0.1407	0.009321	0.02387	0.2785	0.2256	0.09331	0.2604	0.4611	0.08246	0.1905	0.1575	0.2295	0.3105	0.2568	0.431	0.4543	0.583	0.4241	0.4566	0.7198	0.6616	0.6542	0.6983	0.4044	0.6349	0.6922	0.9848	3.717e-05
GO:0031323_regulation_of_cellular_metabolic_process	4.072e-05	6.519e-05	0.0001893	0.0007549	0.0009257	0.0003699	0.0003713	0.02403	0.009119	0.0007359	0.002619	0.02636	0.02089	0.05721	0.58	0.1053	0.02762	0.1092	0.1554	0.06826	0.1392	0.08124	0.1782	0.2094	0.1332	0.2123	0.2374	0.5277	0.2093	0.2163	0.6492	0.2926	0.5402	0.6573	0.6062	0.5887	0.4385	0.9848	3.717e-05
GO:0019222_regulation_of_metabolic_process	4.072e-05	6.519e-05	0.0001893	0.0007549	0.001759	0.001318	0.0005941	0.02967	0.0132	0.001472	0.002619	0.0299	0.03156	0.06527	0.5683	0.1551	0.03375	0.1206	0.1802	0.07429	0.1842	0.1717	0.1993	0.2205	0.1686	0.2988	0.2788	0.5277	0.2714	0.2539	0.6492	0.3064	0.5568	0.6696	0.7065	0.6331	0.4385	0.9848	3.717e-05
GO:0010556_regulation_of_macromolecule_biosynthetic_process	4.072e-05	0.0001812	0.0001893	0.004907	0.001759	0.0008714	0.003487	0.01863	0.01195	0.0007359	0.002619	0.02864	0.02742	0.06188	0.5716	0.168	0.02762	0.1271	0.1524	0.066	0.1637	0.04496	0.2892	0.2989	0.1704	0.3336	0.2733	0.5424	0.3038	0.2497	0.6492	0.2744	0.6308	0.6446	0.54	0.6331	0.451	0.9848	3.717e-05
GO:0010604_positive_regulation_of_macromolecule_metabolic_process	4.072e-05	6.519e-05	0.0004682	0.01724	0.001759	0.000197	0.006262	0.08145	0.01844	0.003785	0.007404	0.02525	0.06616	0.03418	0.5448	0.1399	0.03467	0.1271	0.1519	0.06826	0.1476	0.02176	0.1882	0.2205	0.1556	0.2059	0.2374	0.5277	0.3038	0.5086	0.6492	0.3327	0.5402	0.7061	0.6719	0.6331	0.4489	0.9848	3.717e-05
GO:0080090_regulation_of_primary_metabolic_process	4.072e-05	6.519e-05	0.0001893	0.00104	0.005412	0.0008714	0.0007073	0.01863	0.01368	0.003785	0.003209	0.04863	0.02081	0.05657	0.5448	0.1551	0.03467	0.1271	0.244	0.07975	0.1842	0.1354	0.2188	0.2205	0.221	0.3476	0.3825	0.5109	0.3038	0.2661	0.6694	0.4593	0.5568	0.673	0.6163	0.6331	0.4385	0.9848	3.717e-05
GO:0060255_regulation_of_macromolecule_metabolic_process	4.072e-05	0.0001812	0.0001893	0.004066	0.005716	0.003714	0.001609	0.03223	0.02445	0.003785	0.003209	0.04863	0.02728	0.06155	0.5683	0.168	0.03467	0.1271	0.2061	0.08639	0.2278	0.1828	0.2408	0.2499	0.2342	0.3476	0.3825	0.5109	0.3038	0.2661	0.6492	0.4038	0.5568	0.6696	0.7076	0.6331	0.4273	0.9848	3.717e-05
GO:0010468_regulation_of_gene_expression	4.072e-05	0.0008674	0.0001893	0.00302	0.002748	0.005679	0.004713	0.04558	0.02615	0.0009813	0.002619	0.03399	0.0438	0.1285	0.6581	0.168	0.02762	0.1271	0.1585	0.06826	0.2169	0.1177	0.3117	0.3105	0.2903	0.431	0.3825	0.5409	0.3038	0.2539	0.6726	0.3064	0.5955	0.6573	0.7519	0.6349	0.4385	0.9848	3.717e-05
GO:0051128_regulation_of_cellular_component_organization	0.0008673	0.003937	0.07431	0.0325	0.009368	0.05051	0.1445	0.5586	0.03982	0.02799	0.03989	0.1302	0.1398	0.1429	0.7129	0.2825	0.1436	0.3003	0.2452	0.2109	0.189	0.1717	0.3377	0.2677	0.1704	0.2988	0.2532	0.5424	0.2464	0.5086	0.5388	0.5055	0.6352	0.673	0.8362	0.6331	0.6344	0.9848	3.717e-05
GO:0022008_neurogenesis	4.072e-05	6.519e-05	0.0004682	0.0003536	0.0009257	0.000197	0.0002025	0.0004274	0.0007599	0.0009813	0.004802	0.03194	0.006095	0.01231	0.06969	0.168	0.1122	0.2079	0.2951	0.08246	0.2528	0.1319	0.07602	0.2094	0.1608	0.2676	0.09788	0.5796	0.6089	0.5478	0.7198	0.7084	0.6933	0.7793	0.4859	0.7114	0.7425	0.9848	3.717e-05
GO:0048468_cell_development	4.072e-05	6.519e-05	0.0001893	0.0003536	0.0007995	0.000197	0.0002025	0.0008976	0.0007599	0.0007359	0.002619	0.03194	0.004195	0.00934	0.1893	0.204	0.1014	0.2604	0.1947	0.09077	0.2612	0.2173	0.09863	0.238	0.09685	0.188	0.09652	0.5783	0.6089	0.543	0.6726	0.6862	0.7922	0.673	0.455	0.7114	0.7899	0.9848	3.717e-05
GO:0048513_organ_development	4.072e-05	6.519e-05	0.0007734	0.0003536	0.0007995	0.000197	0.0002025	0.0004274	0.0007599	0.0009813	0.00753	0.08901	0.002663	0.00934	0.006487	0.09708	0.1768	0.2604	0.2983	0.06436	0.2114	0.2173	0.0728	0.2094	0.09457	0.1375	0.1967	0.583	0.6848	0.543	0.7146	0.8962	0.8736	0.7074	0.5305	0.7785	0.886	0.9848	3.717e-05
GO:0021510_spinal_cord_development	0.0001158	6.519e-05	0.001211	0.003495	0.01547	0.0003699	0.001018	0.007451	0.01844	0.03406	0.0593	0.1299	0.004195	0.02242	0.02668	0.204	0.4143	0.3807	0.4252	0.1212	0.1842	0.2889	0.04675	0.2205	0.1295	0.2099	0.2483	0.5109	0.6089	0.61	0.6492	0.8082	0.6114	0.706	0.2453	0.5332	0.7899	0.9848	3.717e-05
GO:0021516_dorsal_spinal_cord_development	0.0003019	0.0008425	0.0164	0.01179	0.0565	0.005586	0.005363	0.01159	0.02319	0.08792	0.06273	0.2201	0.0166	0.03425	0.1176	0.2825	0.4256	0.4671	0.4602	0.1574	0.2418	0.3225	0.09717	0.2499	0.1608	0.2059	0.2579	0.5424	0.6089	0.647	0.6492	0.8048	0.6352	0.673	0.3325	0.5267	0.8309	0.9848	3.717e-05
GO:0050767_regulation_of_neurogenesis	4.072e-05	6.519e-05	0.00232	0.004877	0.006435	0.0003699	0.0002025	0.001584	0.008704	0.007599	0.03989	0.08187	0.009321	0.02072	0.03189	0.351	0.3793	0.4048	0.4693	0.1524	0.307	0.3031	0.1072	0.2452	0.1969	0.3476	0.2579	0.5424	0.5435	0.7304	0.7198	0.6436	0.6816	0.8089	0.3953	0.7114	0.6821	0.9848	3.717e-05
GO:0045664_regulation_of_neuron_differentiation	4.072e-05	6.519e-05	0.00116	0.004877	0.0213	0.000725	0.0002025	0.0008976	0.02462	0.04154	0.08961	0.2159	0.006095	0.01588	0.008722	0.379	0.453	0.5277	0.5482	0.2524	0.3157	0.3225	0.1072	0.2499	0.1974	0.3781	0.315	0.583	0.6848	0.7932	0.732	0.8444	0.7001	0.8416	0.3257	0.7142	0.8134	0.9848	3.717e-05
GO:0051674_localization_of_cell	0.0001158	6.519e-05	0.08781	0.02423	0.0213	0.000197	0.00397	0.009574	0.01207	0.03888	0.07168	0.2159	0.1283	0.06155	0.2794	0.2825	0.274	0.4464	0.2564	0.1163	0.3655	0.4034	0.1591	0.2679	0.1861	0.1915	0.2579	0.5604	0.6089	0.3151	0.6492	0.7208	0.6894	0.673	0.455	0.6331	0.8025	0.9848	3.717e-05
GO:0006928_cellular_component_movement	0.0001158	6.519e-05	0.08781	0.02423	0.0213	0.000197	0.00397	0.009574	0.01207	0.03888	0.07168	0.2159	0.1283	0.06155	0.2794	0.2825	0.274	0.4464	0.2564	0.1163	0.3655	0.4034	0.1591	0.2679	0.1861	0.1915	0.2579	0.5604	0.6089	0.3151	0.6492	0.7208	0.6894	0.673	0.455	0.6331	0.8025	0.9848	3.717e-05
GO:0001654_eye_development	0.0003019	0.006537	0.1147	0.05087	0.08043	0.005679	0.0022	0.01891	0.1179	0.1596	0.09046	0.3348	0.0438	0.06527	0.244	0.2825	0.4022	0.4466	0.4252	0.1656	0.3157	0.3456	0.2342	0.4758	0.4498	0.4427	0.2729	0.583	0.6848	0.5403	0.6492	0.704	0.6542	0.706	0.4913	0.669	0.8053	0.9848	3.717e-05
GO:0008156_negative_regulation_of_DNA_replication	0.1626	0.494	0.1003	0.1368	0.3334	0.09751	0.03264	0.1647	0.1095	0.3149	0.2468	0.2201	0.05887	0.07868	0.1225	0.3411	0.4179	0.1481	0.4188	0.3126	0.3157	0.2117	0.2971	0.4758	0.3866	0.2229	0.4557	0.444	0.3038	0.1846	0.5339	0.6185	0.1816	0.6573	0.3362	0.5356	0.271	0.6229	0.3536
GO:0042330_taxis	0.1898	0.06703	0.1472	0.007784	0.3334	0.004599	0.002516	0.08863	0.1104	0.4489	0.4397	0.5212	0.02081	0.03183	0.3419	0.413	0.5471	0.6243	0.4611	0.3693	0.1392	0.3069	0.07602	0.2205	0.09685	0.1375	0.2189	0.5109	0.6089	0.5086	0.3655	0.7517	0.5653	0.5608	0.2453	0.229	0.6406	0.9848	0.2444
GO:0006935_chemotaxis	0.1898	0.06703	0.1472	0.007784	0.3334	0.004599	0.002516	0.08863	0.1104	0.4489	0.4397	0.5212	0.02081	0.03183	0.3419	0.413	0.5471	0.6243	0.4611	0.3693	0.1392	0.3069	0.07602	0.2205	0.09685	0.1375	0.2189	0.5109	0.6089	0.5086	0.3655	0.7517	0.5653	0.5608	0.2453	0.229	0.6406	0.9848	0.2444
GO:0021533_cell_differentiation_in_hindbrain	0.003141	0.04805	0.01917	0.01143	0.2785	0.003625	0.000798	0.004675	0.1164	0.3373	0.2744	0.5456	0.01758	0.02242	0.06969	0.1986	0.5333	0.4671	0.5844	0.2684	0.2259	0.3345	0.07602	0.2499	0.2375	0.3108	0.4503	0.5109	0.6457	0.5761	0.6492	0.8894	0.5402	0.673	0.2453	0.584	0.7425	0.9848	0.0002466
GO:0009893_positive_regulation_of_metabolic_process	4.072e-05	6.519e-05	0.01966	0.04688	0.005042	0.002385	0.009124	0.1088	0.07569	0.02799	0.03769	0.1238	0.1398	0.08138	0.4502	0.2825	0.1222	0.3684	0.3572	0.1574	0.2685	0.1105	0.3013	0.3106	0.2092	0.3336	0.397	0.583	0.5227	0.6254	0.6969	0.6306	0.6542	0.8593	0.7503	0.7252	0.6991	0.9848	3.717e-05
GO:0045449_regulation_of_transcription	4.072e-05	0.0002364	0.0001893	0.01143	0.01026	0.004599	0.00297	0.01891	0.03168	0.003785	0.009778	0.1428	0.04305	0.1317	0.5988	0.2825	0.1014	0.3087	0.4252	0.1212	0.3157	0.2173	0.3788	0.4758	0.4309	0.5486	0.5151	0.6038	0.4621	0.523	0.7771	0.5914	0.6897	0.7061	0.6745	0.7524	0.6924	0.9848	3.717e-05
GO:0009792_embryonic_development_ending_in_birth_or_egg_hatching	7.319e-05	6.519e-05	0.02241	0.004661	0.009194	0.005106	0.00297	0.03811	0.036	0.006462	0.02012	0.1302	0.02081	0.04141	0.508	0.3177	0.2657	0.3687	0.3585	0.1067	0.3157	0.4035	0.1846	0.3039	0.1704	0.2914	0.3544	0.5167	0.5929	0.543	0.6613	0.6817	0.7001	0.6573	0.6996	0.6614	0.816	0.9848	3.717e-05
GO:0043009_chordate_embryonic_development	4.072e-05	6.519e-05	0.02626	0.006558	0.01143	0.007626	0.00397	0.04046	0.05015	0.01042	0.03386	0.1428	0.02699	0.06155	0.5374	0.379	0.3797	0.4466	0.4252	0.1563	0.3655	0.4792	0.2342	0.3546	0.221	0.3336	0.4503	0.5424	0.6089	0.5754	0.6969	0.7658	0.7978	0.673	0.7519	0.7227	0.8505	0.9848	3.717e-05
GO:0030900_forebrain_development	4.072e-05	6.519e-05	0.02541	0.07415	0.01143	0.005106	0.03054	0.2573	0.01207	0.02728	0.0523	0.07364	0.2705	0.1526	0.3212	0.3495	0.3125	0.3994	0.4064	0.2629	0.4422	0.384	0.3395	0.4758	0.4016	0.431	0.4543	0.583	0.6089	0.5881	0.7198	0.6562	0.7663	0.7105	0.7538	0.6735	0.7899	0.9848	3.717e-05
GO:0043010_camera-type_eye_development	0.0003799	0.004762	0.3845	0.1476	0.04526	0.03042	0.01626	0.1191	0.1398	0.09659	0.06264	0.3169	0.1568	0.258	0.5562	0.379	0.3462	0.4464	0.3617	0.2188	0.4437	0.4035	0.3375	0.501	0.4518	0.4427	0.2712	0.583	0.7	0.5472	0.6694	0.6817	0.665	0.706	0.7519	0.7142	0.7899	0.9848	3.717e-05
GO:0007015_actin_filament_organization	0.06234	0.1862	0.4611	0.04412	0.181	0.02912	0.1759	0.5046	0.1494	0.1981	0.1119	0.2578	0.2126	0.171	0.6917	0.379	0.272	0.5084	0.4611	0.1633	0.3329	0.3387	0.4277	0.3546	0.3278	0.3108	0.3825	0.5611	0.5458	0.5059	0.6492	0.7228	0.6273	0.673	0.7519	0.6331	0.6344	0.982	0.02925
GO:0060349_bone_morphogenesis	0.004334	0.003937	0.1708	0.1927	0.1147	0.09918	0.05629	0.04113	0.05775	0.07286	0.182	0.1817	0.4275	0.4264	0.5355	0.5546	0.5128	0.536	0.5092	0.3844	0.544	0.4035	0.6006	0.6942	0.3926	0.4753	0.4979	0.6992	0.6006	0.6751	0.7198	0.676	0.7922	0.706	0.7348	0.7142	0.8505	0.9848	0.0006022
GO:0021846_cell_proliferation_in_forebrain	0.02364	0.08593	0.224	0.1608	0.2308	0.151	0.1481	0.3793	0.07067	0.1981	0.2468	0.1806	0.2689	0.2462	0.5201	0.413	0.4952	0.4629	0.5634	0.3126	0.4923	0.5276	0.2971	0.3994	0.4797	0.5252	0.5532	0.583	0.6642	0.6646	0.7315	0.7472	0.6608	0.7793	0.6673	0.7142	0.7425	0.9848	0.01285
GO:0048863_stem_cell_differentiation	0.004901	6.519e-05	0.1318	0.1013	0.09589	0.07389	0.1445	0.425	0.1101	0.08741	0.1514	0.1448	0.3113	0.2604	0.78	0.5102	0.5096	0.4961	0.5006	0.4054	0.544	0.7759	0.3891	0.501	0.4162	0.5048	0.5494	0.583	0.6089	0.6581	0.732	0.6562	0.7922	0.8853	0.847	0.8595	0.6482	0.9848	3.717e-05
GO:0048731_system_development	4.072e-05	6.519e-05	0.0007734	0.0003536	0.0004683	0.000197	0.0002025	0.0004274	0.0007599	0.001472	0.01164	0.2052	0.00233	0.00934	0.005148	0.204	0.4179	0.5001	0.5006	0.1163	0.4468	0.4035	0.07602	0.2499	0.09685	0.188	0.2374	0.7351	0.8453	0.7075	0.8761	0.9457	0.9029	0.8988	0.7076	0.9375	0.9466	0.9848	3.717e-05
GO:0048699_generation_of_neurons	4.072e-05	6.519e-05	0.002395	0.001599	0.0004683	0.000197	0.0002025	0.0004274	0.01207	0.003785	0.03049	0.1302	0.01785	0.03926	0.06969	0.379	0.4022	0.4466	0.5092	0.2684	0.5079	0.4035	0.1789	0.3245	0.3857	0.4664	0.2733	0.6787	0.7264	0.7273	0.8437	0.8653	0.8963	0.9015	0.7273	0.8948	0.8505	0.9848	3.717e-05
GO:0007399_nervous_system_development	4.072e-05	6.519e-05	0.003593	0.001263	0.0004683	0.000197	0.0002025	0.0008976	0.01251	0.004416	0.03631	0.1448	0.007865	0.02428	0.05075	0.4631	0.5068	0.5345	0.5612	0.3964	0.544	0.478	0.1307	0.3839	0.1655	0.2988	0.2978	0.7707	0.8456	0.8509	0.9005	0.9457	0.9029	0.9166	0.6673	0.937	0.9446	0.9848	3.717e-05
GO:0048856_anatomical_structure_development	4.072e-05	6.519e-05	0.0007734	0.0003536	0.0004683	0.000197	0.0002025	0.0004274	0.009879	0.003785	0.03049	0.3169	0.00233	0.01231	0.008722	0.3365	0.5333	0.5606	0.5844	0.2305	0.5639	0.5778	0.1034	0.3518	0.1667	0.2059	0.3965	0.7797	0.8611	0.8238	0.9062	0.9483	0.9164	0.9222	0.7538	0.9514	0.9482	0.9848	3.717e-05
GO:0007275_multicellular_organismal_development	4.072e-05	6.519e-05	0.0007734	0.0003536	0.0004683	0.000197	0.0002025	0.0004274	0.008549	0.0007359	0.01303	0.2415	0.004195	0.01581	0.008722	0.379	0.4758	0.5606	0.5703	0.2305	0.544	0.4792	0.1591	0.4513	0.2366	0.2644	0.4503	0.8076	0.8509	0.8257	0.9062	0.9457	0.9164	0.9227	0.7519	0.9514	0.9466	0.9848	3.717e-05
GO:0032502_developmental_process	4.072e-05	6.519e-05	0.0007734	0.0003536	0.0004683	0.000197	0.0002025	0.0004274	0.01017	0.0007359	0.02354	0.2578	0.003107	0.01581	0.01559	0.4152	0.5333	0.6023	0.6131	0.3386	0.6307	0.5471	0.1972	0.501	0.3052	0.2988	0.4663	0.8256	0.8611	0.8509	0.9062	0.9483	0.9181	0.9261	0.7607	0.9514	0.9489	0.9848	3.717e-05
GO:0045165_cell_fate_commitment	4.072e-05	6.519e-05	0.001211	0.004035	0.01941	0.000197	0.0002025	0.009574	0.02451	0.0574	0.0778	0.2673	0.01785	0.05101	0.1851	0.4618	0.5283	0.5271	0.5634	0.2066	0.4422	0.2843	0.1072	0.3994	0.3052	0.4313	0.4663	0.6038	0.7	0.6572	0.7665	0.9229	0.7933	0.8593	0.5601	0.8544	0.8594	0.9848	3.717e-05
GO:0007423_sensory_organ_development	0.0001158	6.519e-05	0.006394	0.01025	0.02057	0.002611	0.0002025	0.0008976	0.07569	0.09629	0.1343	0.3207	0.02185	0.06103	0.06969	0.3802	0.5333	0.5345	0.5676	0.3247	0.3157	0.3099	0.2342	0.501	0.4598	0.5249	0.4663	0.6983	0.6848	0.6572	0.732	0.8444	0.8472	0.8667	0.5114	0.8344	0.8863	0.9848	3.717e-05
GO:0040011_locomotion	0.001068	6.519e-05	0.08553	0.007784	0.1335	0.004531	0.001018	0.01159	0.05015	0.1967	0.3003	0.4301	0.09494	0.07745	0.212	0.4838	0.5333	0.5707	0.5185	0.3247	0.3157	0.3973	0.1925	0.4181	0.2449	0.2425	0.4663	0.583	0.6652	0.5478	0.6726	0.8738	0.8256	0.7571	0.5114	0.6349	0.9008	0.9848	3.717e-05
GO:0065007_biological_regulation	0.0001158	6.519e-05	0.0007734	0.0003536	0.0004683	0.000197	0.0002025	0.0004274	0.0374	0.1967	0.2744	0.5508	0.005932	0.01588	0.07298	0.6284	0.6455	0.7154	0.7498	0.3693	0.4287	0.4792	0.1611	0.4354	0.1932	0.4347	0.5778	0.7742	0.8279	0.7965	0.8862	0.9483	0.9029	0.9015	0.3546	0.7213	0.9466	0.9848	3.717e-05
GO:0050789_regulation_of_biological_process	0.0001158	6.519e-05	0.001211	0.0003536	0.0004683	0.000197	0.0002025	0.0008976	0.05023	0.1759	0.2452	0.5456	0.01049	0.02428	0.1622	0.6856	0.6409	0.7336	0.7383	0.4422	0.4437	0.4792	0.2342	0.501	0.2342	0.4826	0.5877	0.8099	0.8279	0.7965	0.8868	0.9481	0.9029	0.9052	0.455	0.7931	0.9482	0.9848	3.717e-05
GO:0021515_cell_differentiation_in_spinal_cord	0.002438	0.0008674	0.006394	0.04555	0.1342	0.004599	0.002516	0.01521	0.1719	0.2403	0.3731	0.4213	0.02457	0.06155	0.0705	0.5898	0.637	0.6641	0.6941	0.4684	0.5246	0.5756	0.2342	0.5411	0.3782	0.5065	0.5565	0.7222	0.8279	0.8335	0.7973	0.9337	0.8472	0.8988	0.4077	0.7142	0.9286	0.9848	3.717e-05
GO:0021527_spinal_cord_association_neuron_differentiation	0.005745	0.01917	0.08015	0.03272	0.2062	0.05412	0.01843	0.08863	0.1173	0.3013	0.3179	0.4572	0.0413	0.1322	0.3578	0.4415	0.5423	0.5606	0.6131	0.4504	0.4422	0.4901	0.1925	0.3834	0.43	0.4313	0.5151	0.583	0.7283	0.7687	0.7198	0.8962	0.6816	0.8416	0.5021	0.6331	0.8594	0.9848	0.0007743
GO:0045665_negative_regulation_of_neuron_differentiation	0.003748	0.02004	0.09708	0.01999	0.1517	0.0301	0.01709	0.06119	0.2709	0.3321	0.3828	0.5485	0.0495	0.2494	0.1549	0.4415	0.5333	0.5606	0.6131	0.5347	0.5079	0.5471	0.1528	0.3994	0.4486	0.4826	0.5877	0.6152	0.7599	0.7965	0.8289	0.9004	0.6816	0.8739	0.5114	0.7524	0.7899	0.9848	0.0008133
GO:0016477_cell_migration	0.002923	6.519e-05	0.02626	0.08122	0.203	0.01002	0.007863	0.002532	0.09032	0.2471	0.4397	0.4551	0.2895	0.2114	0.1433	0.558	0.5494	0.607	0.6131	0.4504	0.544	0.4792	0.3994	0.501	0.4498	0.4114	0.5877	0.6787	0.7	0.6472	0.7787	0.8962	0.8963	0.8908	0.5728	0.8097	0.9008	0.9848	3.717e-05
GO:0006357_regulation_of_transcription_from_RNA_polymerase_II_promoter	4.072e-05	6.519e-05	0.002477	0.04354	0.0145	0.000197	0.0003713	0.004675	0.1164	0.009015	0.02153	0.2201	0.09494	0.2416	0.216	0.4524	0.3054	0.5606	0.5844	0.1212	0.4923	0.4792	0.3395	0.5161	0.5106	0.6912	0.5303	0.7707	0.6848	0.6572	0.7789	0.8048	0.8316	0.8739	0.7076	0.8848	0.8594	0.9848	3.717e-05
GO:0048869_cellular_developmental_process	4.072e-05	6.519e-05	0.0099	0.0008287	0.005042	0.000197	0.0002025	0.0008976	0.03168	0.006462	0.04889	0.3073	0.05116	0.08138	0.1937	0.5176	0.508	0.5345	0.5844	0.4228	0.648	0.5926	0.53	0.5775	0.4783	0.4313	0.5151	0.7969	0.8279	0.8226	0.904	0.9277	0.905	0.9052	0.8236	0.9398	0.9446	0.9848	3.717e-05
GO:0030154_cell_differentiation	4.072e-05	6.519e-05	0.01059	0.00104	0.0004683	0.000197	0.0002025	0.0008976	0.03168	0.008063	0.06273	0.3616	0.0551	0.1008	0.2113	0.5546	0.5333	0.5707	0.6131	0.4504	0.648	0.6131	0.53	0.579	0.4783	0.4518	0.5151	0.8118	0.8296	0.8353	0.9062	0.9308	0.9162	0.9166	0.8362	0.9398	0.9466	0.9848	3.717e-05
GO:0009887_organ_morphogenesis	4.072e-05	6.519e-05	0.01793	0.007156	0.003328	0.004599	0.0002025	0.0004274	0.1164	0.04978	0.1751	0.4431	0.09494	0.173	0.2105	0.413	0.5333	0.5271	0.6131	0.4568	0.544	0.5944	0.287	0.4758	0.4499	0.5249	0.7569	0.7707	0.8279	0.8095	0.9062	0.9457	0.8982	0.9261	0.847	0.9398	0.911	0.9848	3.717e-05
GO:0009653_anatomical_structure_morphogenesis	4.072e-05	6.519e-05	0.004284	0.006558	0.0009257	0.000197	0.0002025	0.0004274	0.09612	0.01042	0.08703	0.3647	0.0438	0.06188	0.1724	0.5102	0.5471	0.5865	0.6131	0.4729	0.6307	0.6453	0.3351	0.5372	0.4353	0.5065	0.6822	0.8144	0.8541	0.8509	0.9062	0.9457	0.9164	0.9261	0.8399	0.9514	0.9466	0.9848	3.717e-05
GO:0030182_neuron_differentiation	4.072e-05	6.519e-05	0.1376	0.01874	0.005042	0.000197	0.0002025	0.02271	0.07067	0.02758	0.103	0.2982	0.1193	0.1322	0.5562	0.5373	0.5333	0.5405	0.5864	0.4504	0.648	0.492	0.3395	0.5125	0.5459	0.5996	0.5056	0.7808	0.8279	0.7687	0.9005	0.9245	0.9029	0.9227	0.8399	0.9322	0.9286	0.9848	3.717e-05
GO:0022613_ribonucleoprotein_complex_biogenesis	0.3209	0.4529	0.2379	0.0646	0.1458	0.02166	0.2994	0.3471	0.06881	0.006901	0.1231	0.008909	0.4695	0.2924	0.5547	0.1853	0.5305	0.3518	0.1961	0.06273	0.6352	0.03931	0.1439	0.3768	0.2941	0.4187	0.2833	0.3026	0.3736	0.6883	0.6704	0.1486	0.04464	0.1532	0.1254	0.1467	0.156	0.4162	0.188
GO:0051084_'de_novo'_posttranslational_protein_folding	0.2822	0.4269	0.2286	0.1112	0.3279	0.1763	0.02127	0.2564	0.09111	0.02662	0.2536	0.2226	0.2206	0.2844	0.1143	0.2655	0.4297	0.1669	0.1742	0.2688	0.4191	0.2047	0.1088	0.3109	0.391	0.4103	0.3031	0.4521	0.1549	0.4543	0.3017	0.2073	0.05154	0.1979	0.02552	0.1209	0.1609	0.1534	0.2123
GO:0006458_'de_novo'_protein_folding	0.3369	0.6044	0.2675	0.09646	0.4373	0.2595	0.03739	0.3011	0.0761	0.02813	0.4905	0.1596	0.2211	0.2844	0.2775	0.3173	0.5579	0.4183	0.4778	0.3336	0.3445	0.2055	0.1822	0.6496	0.4557	0.5991	0.3189	0.4438	0.2821	0.7273	0.5815	0.3566	0.04262	0.2214	0.08394	0.1186	0.1442	0.15	0.2046
GO:0044249_cellular_biosynthetic_process	0.1861	0.4269	0.1929	0.1607	0.7657	0.07782	0.07698	0.3011	0.1431	0.5271	0.06173	0.4187	0.08765	0.7732	0.5917	0.6029	0.6646	0.2733	0.1961	0.3913	0.7424	0.419	0.6224	0.5937	0.5452	0.1632	0.4156	0.444	0.2494	0.7929	0.5815	0.03027	0.1106	0.1566	0.04672	0.0243	0.4022	0.1324	0.7582
GO:0043543_protein_amino_acid_acylation	0.2675	0.7148	0.06386	0.1708	0.3279	0.4109	0.1579	0.6588	0.03137	0.176	0.1103	0.01866	0.5163	0.5414	0.1057	0.5281	0.502	0.5142	0.3372	0.2257	0.4572	0.202	0.2281	0.6136	0.391	0.7212	0.4805	0.5435	0.4299	0.511	0.5714	0.1537	0.01762	0.1028	0.033	0.0379	0.06362	0.2194	0.5435
GO:0006473_protein_amino_acid_acetylation	0.1527	0.7313	0.07431	0.2034	0.5057	0.4688	0.3411	0.8976	0.2243	0.127	0.07447	0.06113	0.5691	0.7079	0.05579	0.5198	0.4809	0.5546	0.5533	0.3479	0.7581	0.3202	0.2727	0.6136	0.6083	0.785	0.5127	0.5844	0.6117	0.7301	0.6199	0.2005	0.06044	0.2693	0.05675	0.02782	0.07694	0.3627	0.5903
GO:0016072_rRNA_metabolic_process	0.5174	0.5018	0.7351	0.07391	0.5883	0.2636	0.6321	0.6554	0.3793	0.04651	0.1231	0.02234	0.7454	0.3148	0.9031	0.5423	0.5807	0.6552	0.1209	0.1939	0.7421	0.109	0.2717	0.4319	0.1617	0.1878	0.07236	0.3007	0.372	0.7929	0.4589	0.2092	0.1622	0.04854	0.6237	0.53	0.406	0.6003	0.6701
GO:0034470_ncRNA_processing	0.7567	0.6821	0.6761	0.04454	0.6635	0.7348	0.6828	0.611	0.7145	0.02253	0.5454	0.1205	0.5229	0.826	0.9267	0.7019	0.5807	0.8029	0.1507	0.5548	0.8902	0.1558	0.249	0.6799	0.541	0.6072	0.135	0.3641	0.7452	0.8177	0.7939	0.4237	0.1622	0.03273	0.7576	0.9032	0.6179	0.6563	0.5593
GO:0070727_cellular_macromolecule_localization	0.02374	0.4529	0.1411	0.4643	0.2316	0.02478	0.6456	0.1617	0.6862	0.6858	0.1993	0.6618	0.796	0.3942	0.8411	0.5392	0.3815	0.2508	0.4209	0.7868	0.4476	0.05588	0.3423	0.5163	0.2333	0.3492	0.3708	0.2596	0.627	0.4335	0.4288	0.2217	0.4334	0.6013	0.2304	0.1645	0.1292	0.5152	0.5447
GO:0034613_cellular_protein_localization	0.03029	0.4529	0.1506	0.4759	0.2379	0.04313	0.6866	0.1639	0.7183	0.7063	0.2217	0.6618	0.802	0.4023	0.8581	0.5478	0.4324	0.2508	0.4695	0.8056	0.454	0.08383	0.3623	0.5386	0.2362	0.365	0.4245	0.2879	0.7011	0.4934	0.4343	0.2361	0.449	0.6153	0.2304	0.1929	0.1519	0.52	0.5593
GO:0006886_intracellular_protein_transport	0.01714	0.6452	0.2367	0.638	0.5336	0.06211	0.836	0.4616	0.808	0.7422	0.3859	0.7925	0.864	0.5006	0.8714	0.6497	0.6932	0.2535	0.6736	0.8268	0.6118	0.2107	0.4117	0.5757	0.3679	0.5641	0.4939	0.4083	0.8605	0.6895	0.5734	0.4526	0.637	0.7784	0.3636	0.4154	0.4364	0.7162	0.6823
GO:0055086_nucleobase,_nucleoside_and_nucleotide_metabolic_process	0.04972	0.4047	0.1993	0.1659	0.7336	0.5418	0.8531	0.7195	0.6919	0.7118	0.7567	0.4257	0.7135	0.3555	0.1675	0.6386	0.7417	0.2903	0.4778	0.8348	0.7245	0.5386	0.3423	0.3503	0.1809	0.4503	0.2947	0.1314	0.7284	0.6841	0.5665	0.3333	0.5984	0.2558	0.4768	0.5032	0.406	0.7816	0.6633
GO:0006338_chromatin_remodeling	0.04466	0.46	0.3771	0.3595	0.2785	0.04867	0.353	0.6461	0.1164	0.3114	0.3563	0.5481	0.1778	0.211	0.9031	0.5716	0.5333	0.589	0.4693	0.4226	0.3812	0.4035	0.2432	0.501	0.3247	0.431	0.447	0.6138	0.5205	0.543	0.6492	0.6185	0.6352	0.673	0.4913	0.5356	0.7899	0.895	0.2296
GO:0001701_in_utero_embryonic_development	0.02219	0.07553	0.1915	0.07439	0.1145	0.3101	0.1596	0.4994	0.5412	0.09659	0.1422	0.4551	0.1785	0.5218	0.7748	0.379	0.2655	0.4634	0.4252	0.4595	0.544	0.7107	0.4056	0.4181	0.4783	0.431	0.5877	0.5424	0.5289	0.543	0.7198	0.5965	0.6816	0.6573	0.847	0.7142	0.7498	0.9848	0.04258
GO:0030100_regulation_of_endocytosis	0.1939	0.03355	0.6964	0.1027	0.2062	0.1944	0.5884	0.8197	0.5919	0.4033	0.3017	0.6189	0.3116	0.6026	0.8218	0.2825	0.272	0.2999	0.5803	0.4504	0.3157	0.5447	0.3351	0.2499	0.4797	0.459	0.5524	0.5109	0.6089	0.5631	0.7198	0.7658	0.5402	0.7105	0.847	0.6932	0.6344	0.6467	0.1532
GO:0044267_cellular_protein_metabolic_process	4.072e-05	0.8209	0.0001893	0.02013	0.3558	0.0401	0.5295	0.8976	0.6799	0.1194	0.01276	0.2909	0.3083	0.5508	0.732	0.5678	0.4256	0.4591	0.4863	0.5539	0.6598	0.6915	0.8245	0.777	0.821	0.5641	0.7954	0.6038	0.4979	0.2749	0.3098	0.005083	0.4237	0.1538	0.002181	0.0004645	0.02428	0.003283	0.6835
GO:0019538_protein_metabolic_process	0.003235	0.8209	0.0001893	0.1051	0.484	0.07217	0.6572	0.8976	0.7065	0.2241	0.02275	0.4665	0.7985	0.6789	0.9267	0.6284	0.5333	0.5148	0.5844	0.5548	0.7001	0.7878	0.8207	0.7789	0.8093	0.6359	0.7954	0.6983	0.4608	0.4575	0.3251	0.01381	0.3465	0.2214	0.02208	0.0006728	0.2396	0.0167	0.7243
GO:0010608_posttranscriptional_regulation_of_gene_expression	0.005767	0.7001	0.1681	0.4377	0.3038	0.1447	0.7404	0.8382	0.6756	0.1873	0.1576	0.3311	0.5739	0.7591	0.8454	0.6587	0.4009	0.6335	0.4693	0.6208	0.6737	0.5513	0.7336	0.7155	0.6479	0.6253	0.6833	0.6201	0.7	0.5757	0.6348	0.4483	0.05717	0.3237	0.1956	0.05784	0.02415	0.2329	0.2358
GO:0040029_regulation_of_gene_expression,_epigenetic	0.0148	0.1887	0.05284	0.3909	0.2394	0.318	0.5617	0.5783	0.2598	0.2023	0.3432	0.1576	0.7459	0.7639	0.4186	0.5738	0.5333	0.2919	0.5236	0.6118	0.7721	0.645	0.7741	0.7473	0.7659	0.7342	0.7845	0.7642	0.2625	0.4985	0.3713	0.3269	0.4409	0.5665	0.3671	0.1118	0.1102	0.9795	0.3089
GO:0016568_chromatin_modification	7.319e-05	0.6948	0.01044	0.05363	0.2454	0.2851	0.8233	0.8756	0.2267	0.1432	0.1744	0.4572	0.6648	0.6795	0.1227	0.5106	0.4523	0.5084	0.5006	0.3693	0.647	0.5756	0.6167	0.6706	0.6703	0.7224	0.5565	0.6749	0.4588	0.6254	0.7198	0.4854	0.6517	0.673	0.1254	0.1338	0.4725	0.8851	0.4226
GO:0016569_covalent_chromatin_modification	0.0001357	0.7363	0.007843	0.1025	0.3931	0.687	0.4708	0.8976	0.309	0.3114	0.2243	0.4438	0.7443	0.7692	0.3178	0.6232	0.5333	0.6023	0.6568	0.4742	0.7721	0.6665	0.7706	0.7737	0.7659	0.8096	0.7261	0.7784	0.6089	0.7687	0.7996	0.5694	0.3465	0.8141	0.1936	0.006253	0.1055	0.7766	0.5994
GO:0016570_histone_modification	0.000287	0.6948	0.01218	0.1202	0.4268	0.6982	0.4388	0.8976	0.3167	0.3605	0.2713	0.3795	0.7443	0.7775	0.2249	0.6284	0.5349	0.628	0.6845	0.4923	0.7651	0.706	0.7718	0.7731	0.7694	0.8096	0.6894	0.7797	0.6089	0.7687	0.8209	0.5438	0.3465	0.8205	0.2476	0.007138	0.1325	0.8698	0.6383
GO:0044265_cellular_macromolecule_catabolic_process	0.07305	0.7233	0.302	0.7224	0.6821	0.2005	0.2129	0.6627	0.2713	0.6366	0.3334	0.6699	0.08481	0.3244	0.226	0.5457	0.1638	0.7152	0.7734	0.7869	0.1999	0.4022	0.6811	0.7637	0.8483	0.7633	0.5642	0.6397	0.4091	0.6489	0.3251	0.2548	0.7042	0.8061	0.09995	0.04382	0.3526	0.5346	0.7582
GO:0034962_cellular_macromolecule_catabolic_process	0.03215	0.7939	0.2345	0.7148	0.7314	0.2136	0.3934	0.7157	0.4646	0.6882	0.5218	0.6998	0.1981	0.3061	0.3514	0.7866	0.4179	0.745	0.8185	0.8164	0.4035	0.7341	0.7473	0.7892	0.8652	0.7824	0.7725	0.707	0.5898	0.6489	0.3558	0.451	0.7585	0.8139	0.1389	0.1153	0.4364	0.6467	0.7582
GO:0007049_cell_cycle	0.00209	0.8097	0.1969	0.2222	0.7118	0.2848	0.4444	0.8388	0.8125	0.1738	0.4101	0.6857	0.6477	0.5144	0.9267	0.5115	0.4344	0.2733	0.4303	0.6294	0.672	0.532	0.557	0.4487	0.6135	0.5707	0.4949	0.65	0.5093	0.4988	0.7118	0.1492	0.5665	0.2118	0.4255	0.437	0.388	0.3927	0.5593
GO:0022402_cell_cycle_process	0.03454	0.8215	0.4127	0.2222	0.6821	0.6435	0.08419	0.8786	0.7697	0.08544	0.3768	0.6857	0.543	0.6689	0.8218	0.442	0.5414	0.3191	0.5902	0.4609	0.5368	0.2348	0.4978	0.4319	0.8174	0.6251	0.5715	0.707	0.6188	0.5895	0.7028	0.06468	0.7442	0.2693	0.5472	0.4368	0.5588	0.427	0.7047
GO:0022403_cell_cycle_phase	0.0272	0.8215	0.3524	0.3796	0.7057	0.4825	0.4481	0.685	0.6838	0.3433	0.3778	0.7141	0.5163	0.7079	0.7208	0.7866	0.6845	0.08942	0.3794	0.7862	0.6466	0.4659	0.8442	0.6697	0.8511	0.6251	0.7543	0.6147	0.503	0.7301	0.5665	0.3063	0.4491	0.2932	0.5011	0.4069	0.6406	0.442	0.7582
GO:0048285_organelle_fission	0.5075	0.6689	0.5195	0.09637	0.6901	0.9038	0.5866	0.4036	0.5798	0.5704	0.2971	0.7639	0.9074	0.5414	0.473	0.6413	0.4474	0.03603	0.4743	0.5749	0.3412	0.1136	0.8442	0.6496	0.7685	0.5889	0.8108	0.707	0.5109	0.3054	0.2455	0.1674	0.3483	0.1446	0.5947	0.2983	0.4601	0.5271	0.4527
GO:0000087_M_phase_of_mitotic_cell_cycle	0.4567	0.8215	0.58	0.126	0.7972	0.8905	0.6321	0.4036	0.6551	0.539	0.3947	0.8068	0.9144	0.7079	0.738	0.8002	0.4787	0.03161	0.4767	0.5609	0.3647	0.1488	0.8442	0.7634	0.8726	0.5889	0.817	0.7682	0.503	0.2277	0.2306	0.1425	0.3483	0.1225	0.6198	0.2724	0.544	0.5679	0.5435
GO:0007067_mitosis	0.4765	0.8215	0.6746	0.1222	0.8008	0.9062	0.7203	0.4915	0.7331	0.6198	0.3947	0.8314	0.9116	0.7249	0.702	0.8002	0.6442	0.04698	0.5359	0.6076	0.454	0.1807	0.8831	0.7989	0.901	0.6251	0.8487	0.8077	0.5655	0.3106	0.3017	0.1674	0.4491	0.1589	0.7058	0.3151	0.5957	0.658	0.5593
GO:0000280_nuclear_division	0.4765	0.8215	0.6746	0.1222	0.8008	0.9062	0.7203	0.4915	0.7331	0.6198	0.3947	0.8314	0.9116	0.7249	0.702	0.8002	0.6442	0.04698	0.5359	0.6076	0.454	0.1807	0.8831	0.7989	0.901	0.6251	0.8487	0.8077	0.5655	0.3106	0.3017	0.1674	0.4491	0.1589	0.7058	0.3151	0.5957	0.658	0.5593
GO:0050919_negative_chemotaxis	0.1245	0.1015	0.06686	0.2086	0.3524	0.07903	0.02216	0.04113	0.1977	0.4017	0.4083	0.5092	0.1157	0.05657	0.1359	0.5106	0.5338	0.607	0.5634	0.4487	0.4325	0.5471	0.1591	0.4758	0.3344	0.431	0.4663	0.6201	0.6735	0.6572	0.6694	0.872	0.6754	0.7287	0.2453	0.6331	0.8594	0.9848	0.0924
GO:0021680_cerebellar_Purkinje_cell_layer_development	0.02032	0.1824	0.04457	0.04031	0.3418	0.0252	0.00397	0.0223	0.1872	0.4926	0.3637	0.6346	0.02185	0.05101	0.07298	0.379	0.5654	0.528	0.6131	0.4745	0.4422	0.583	0.1034	0.3039	0.4016	0.4459	0.5494	0.5424	0.6735	0.6913	0.7153	0.8962	0.6352	0.747	0.3165	0.6349	0.7909	0.9848	0.004526
GO:0021702_cerebellar_Purkinje_cell_differentiation	0.0607	0.2236	0.05699	0.06923	0.3516	0.06552	0.009124	0.02971	0.309	0.5444	0.4747	0.6682	0.0438	0.08742	0.1182	0.379	0.5831	0.5345	0.7083	0.5379	0.4442	0.4907	0.1072	0.3518	0.4783	0.5065	0.6537	0.5801	0.6848	0.7496	0.732	0.9206	0.6352	0.8372	0.2453	0.6614	0.8035	0.9848	0.01872
GO:0021694_cerebellar_Purkinje_cell_layer_formation	0.0607	0.2236	0.05699	0.06923	0.3516	0.06552	0.009124	0.02971	0.309	0.5444	0.4747	0.6682	0.0438	0.08742	0.1182	0.379	0.5831	0.5345	0.7083	0.5379	0.4442	0.4907	0.1072	0.3518	0.4783	0.5065	0.6537	0.5801	0.6848	0.7496	0.732	0.9206	0.6352	0.8372	0.2453	0.6614	0.8035	0.9848	0.01872
GO:0021692_cerebellar_Purkinje_cell_layer_morphogenesis	0.0607	0.2236	0.05699	0.06923	0.3516	0.06552	0.009124	0.02971	0.309	0.5444	0.4747	0.6682	0.0438	0.08742	0.1182	0.379	0.5831	0.5345	0.7083	0.5379	0.4442	0.4907	0.1072	0.3518	0.4783	0.5065	0.6537	0.5801	0.6848	0.7496	0.732	0.9206	0.6352	0.8372	0.2453	0.6614	0.8035	0.9848	0.01872
GO:0021697_cerebellar_cortex_formation	0.03069	0.105	0.142	0.08704	0.4322	0.03315	0.01451	0.02845	0.2709	0.5326	0.4617	0.6525	0.06941	0.1322	0.2377	0.4935	0.6196	0.5606	0.6982	0.5848	0.544	0.5471	0.2229	0.4758	0.56	0.5491	0.7036	0.5917	0.6865	0.7965	0.8144	0.9277	0.7001	0.8908	0.487	0.8087	0.8505	0.9848	0.004061
GO:0048592_eye_morphogenesis	0.00839	0.01189	0.08015	0.1324	0.3418	0.04795	0.001506	0.01395	0.2961	0.4191	0.4974	0.5841	0.04151	0.09551	0.158	0.5106	0.5984	0.6763	0.6827	0.4484	0.544	0.5566	0.3099	0.6325	0.6164	0.6715	0.6459	0.7707	0.8279	0.673	0.7789	0.9091	0.8472	0.8908	0.3868	0.8848	0.9099	0.9848	0.0001063
GO:0032963_collagen_metabolic_process	0.1381	0.01635	0.3419	0.2581	0.4	0.151	0.09441	0.3712	0.1626	0.5082	0.4789	0.5456	0.1761	0.1035	0.5921	0.5373	0.6368	0.7152	0.6014	0.3693	0.4442	0.5349	0.2404	0.4758	0.1961	0.3336	0.5151	0.6038	0.6848	0.6697	0.6492	0.8962	0.6542	0.7074	0.3546	0.6331	0.8594	0.9848	0.04176
GO:0044259_multicellular_organismal_macromolecule_metabolic_process	0.2067	0.02782	0.4039	0.4005	0.4598	0.2004	0.1604	0.3506	0.244	0.5326	0.5314	0.5841	0.3276	0.1395	0.6581	0.5898	0.6925	0.7159	0.6457	0.4484	0.4718	0.6415	0.3035	0.5161	0.3052	0.431	0.5877	0.6749	0.7432	0.7496	0.6694	0.8962	0.6924	0.8407	0.4155	0.6331	0.9099	0.9848	0.05369
GO:0007626_locomotory_behavior	0.1365	0.0063	0.2088	0.03953	0.4409	0.05405	0.006365	0.2872	0.3549	0.5444	0.6186	0.6525	0.1583	0.236	0.5572	0.6665	0.71	0.7385	0.6982	0.6477	0.5117	0.6098	0.2971	0.4758	0.3684	0.3476	0.6456	0.6246	0.7545	0.7381	0.7315	0.9277	0.8472	0.8416	0.585	0.6614	0.9446	0.9848	0.008472
GO:0045595_regulation_of_cell_differentiation	4.072e-05	6.519e-05	0.006187	0.02747	0.0145	0.0144	0.0004609	0.001402	0.02736	0.03105	0.2011	0.2814	0.05839	0.06527	0.07298	0.7037	0.6455	0.628	0.7498	0.4504	0.6719	0.6382	0.5748	0.7518	0.6481	0.7996	0.7644	0.8144	0.8279	0.877	0.9005	0.9245	0.9029	0.9261	0.7124	0.9514	0.9142	0.9848	3.717e-05
GO:0001501_skeletal_system_development	4.072e-05	6.519e-05	0.0007734	0.01566	0.0266	0.005161	0.0002025	0.0004274	0.02462	0.167	0.304	0.4989	0.02225	0.03183	0.01655	0.7068	0.7624	0.7613	0.793	0.4504	0.7388	0.5784	0.5162	0.7649	0.4783	0.7074	0.7118	0.8381	0.8712	0.8543	0.9005	0.9483	0.9164	0.9052	0.5601	0.9489	0.9489	0.9848	3.717e-05
GO:0051252_regulation_of_RNA_metabolic_process	4.072e-05	0.0002757	0.001211	0.003367	0.005561	0.004931	0.0002025	0.004284	0.1845	0.3176	0.3003	0.6189	0.02081	0.0548	0.2014	0.5838	0.6062	0.7154	0.7739	0.4504	0.5208	0.554	0.4332	0.6089	0.4783	0.6728	0.7569	0.8144	0.8332	0.8257	0.8862	0.9457	0.8982	0.9166	0.455	0.8948	0.9466	0.9848	3.717e-05
GO:0050794_regulation_of_cellular_process	0.0003799	6.519e-05	0.00232	0.0003536	0.0004683	0.000197	0.0002025	0.001402	0.1101	0.2877	0.4083	0.6336	0.02089	0.041	0.212	0.7337	0.723	0.7837	0.7979	0.5233	0.5246	0.5495	0.3377	0.6397	0.3684	0.615	0.7261	0.8381	0.8456	0.8509	0.9062	0.9504	0.9164	0.9261	0.5605	0.8848	0.957	0.9848	3.717e-05
GO:0048705_skeletal_system_morphogenesis	4.072e-05	6.519e-05	0.004152	0.06059	0.1475	0.03227	0.000798	0.001653	0.1179	0.2877	0.4083	0.5499	0.09494	0.07801	0.2377	0.7068	0.7168	0.745	0.7498	0.5379	0.647	0.5471	0.6006	0.7745	0.4107	0.5724	0.6456	0.8381	0.8524	0.8728	0.9005	0.9457	0.9029	0.8988	0.6192	0.9112	0.9466	0.9848	3.717e-05
GO:0048706_embryonic_skeletal_system_development	0.008389	0.0002757	0.007109	0.09222	0.2474	0.117	0.001828	0.005862	0.1697	0.3956	0.4644	0.5886	0.0913	0.06231	0.1622	0.7553	0.7469	0.7606	0.793	0.5539	0.648	0.5471	0.5748	0.7854	0.5106	0.6912	0.7622	0.8314	0.8611	0.8959	0.9005	0.9481	0.9164	0.9222	0.5779	0.9398	0.9482	0.9848	3.717e-05
GO:0009890_negative_regulation_of_biosynthetic_process	4.072e-05	0.00557	0.002341	0.1076	0.09529	0.0618	0.006957	0.01159	0.1369	0.03105	0.1514	0.2201	0.1441	0.2416	0.3457	0.5976	0.5333	0.5865	0.6933	0.3693	0.648	0.5756	0.5748	0.6706	0.6453	0.7856	0.7569	0.7707	0.6764	0.7304	0.7996	0.8444	0.8472	0.8407	0.7519	0.9063	0.8345	0.9848	3.717e-05
GO:0031327_negative_regulation_of_cellular_biosynthetic_process	4.072e-05	0.007493	0.002033	0.1076	0.1016	0.064	0.005363	0.007451	0.1349	0.03764	0.1738	0.2673	0.1398	0.2473	0.3045	0.6066	0.5333	0.5886	0.7078	0.3964	0.6719	0.5858	0.5771	0.6881	0.6481	0.7968	0.7748	0.7707	0.6835	0.7496	0.8222	0.8668	0.854	0.8586	0.7519	0.9183	0.8505	0.9848	3.717e-05
GO:0010558_negative_regulation_of_macromolecule_biosynthetic_process	4.072e-05	0.02218	0.002557	0.1361	0.1335	0.1003	0.01443	0.01555	0.1845	0.04158	0.2344	0.2909	0.2415	0.3604	0.324	0.684	0.5494	0.6571	0.7218	0.4504	0.739	0.6415	0.6423	0.7518	0.7134	0.8106	0.8018	0.7925	0.7012	0.7784	0.8424	0.872	0.8963	0.8666	0.7668	0.9375	0.8505	0.9848	3.717e-05
GO:0009790_embryonic_development	4.072e-05	6.519e-05	0.1039	0.03646	0.007329	0.02692	0.005092	0.09868	0.1349	0.009015	0.05693	0.1782	0.1614	0.4323	0.6297	0.5106	0.5333	0.536	0.5844	0.4595	0.6699	0.7368	0.5058	0.6295	0.6029	0.6728	0.7261	0.6983	0.8158	0.7922	0.9005	0.8962	0.9029	0.9052	0.8868	0.9514	0.9166	0.9848	3.717e-05
GO:0010975_regulation_of_neuron_projection_development	4.072e-05	0.001996	0.1051	0.05913	0.1393	0.03456	0.01307	0.08684	0.1248	0.1313	0.2584	0.402	0.05341	0.06903	0.5562	0.5898	0.5471	0.607	0.6457	0.4504	0.5246	0.4636	0.3983	0.5054	0.4783	0.5376	0.5494	0.6749	0.6764	0.8175	0.7667	0.8633	0.8568	0.8461	0.8236	0.8544	0.8863	0.9848	3.717e-05
GO:0050770_regulation_of_axonogenesis	7.319e-05	0.001361	0.1051	0.1076	0.2076	0.01298	0.0135	0.04752	0.1179	0.2333	0.3475	0.492	0.0712	0.09612	0.5405	0.6284	0.6291	0.6818	0.7121	0.4595	0.5246	0.4792	0.4277	0.5528	0.4783	0.615	0.538	0.6983	0.7404	0.8509	0.7789	0.9277	0.8963	0.8739	0.7668	0.8583	0.9286	0.9848	3.717e-05
GO:0031344_regulation_of_cell_projection_organization	7.319e-05	0.00366	0.1102	0.03501	0.1636	0.06678	0.01353	0.1899	0.157	0.2299	0.3003	0.4572	0.0495	0.05101	0.595	0.7036	0.6368	0.7152	0.7083	0.5228	0.544	0.5448	0.3994	0.6397	0.4783	0.6234	0.6552	0.7707	0.6848	0.8509	0.7787	0.8962	0.8982	0.8908	0.7538	0.8848	0.9067	0.9848	0.0001063
GO:0048519_negative_regulation_of_biological_process	4.072e-05	6.519e-05	0.01869	0.00442	0.0087	0.04356	0.000798	0.007451	0.2709	0.1757	0.3637	0.5092	0.06417	0.07801	0.3704	0.6587	0.5895	0.6763	0.7378	0.5539	0.544	0.7368	0.3395	0.543	0.4016	0.6234	0.7444	0.7707	0.7626	0.8509	0.864	0.9277	0.8982	0.9007	0.7332	0.93	0.9446	0.9848	3.717e-05
GO:0048523_negative_regulation_of_cellular_process	4.072e-05	6.519e-05	0.05915	0.006558	0.0145	0.04239	0.005363	0.02971	0.3039	0.09733	0.2635	0.4551	0.1134	0.2241	0.6569	0.6	0.5338	0.607	0.7201	0.5539	0.6223	0.719	0.3983	0.5125	0.4742	0.699	0.7261	0.7707	0.7432	0.8509	0.8862	0.8962	0.8982	0.9015	0.8362	0.9375	0.9099	0.9848	3.717e-05
GO:0006355_regulation_of_transcription,_DNA-dependent	4.072e-05	6.519e-05	0.007109	0.02245	0.0004683	0.00939	0.0004609	0.01024	0.2506	0.1855	0.2452	0.5681	0.04151	0.2704	0.5448	0.5771	0.5634	0.7164	0.7498	0.4504	0.6074	0.5897	0.5748	0.6791	0.6035	0.7363	0.7615	0.8381	0.8279	0.8257	0.9005	0.9308	0.9008	0.9019	0.6673	0.9375	0.9466	0.9848	3.717e-05
GO:0051093_negative_regulation_of_developmental_process	0.001224	0.0008674	0.09281	0.05803	0.1342	0.05611	0.007145	0.144	0.1349	0.1971	0.4644	0.4551	0.1728	0.1322	0.5201	0.6831	0.6725	0.6571	0.7378	0.6118	0.647	0.7759	0.4039	0.6462	0.4783	0.6253	0.6833	0.8144	0.8381	0.8986	0.9005	0.9277	0.8982	0.9261	0.7124	0.9375	0.9446	0.9848	3.717e-05
GO:0050793_regulation_of_developmental_process	4.072e-05	6.519e-05	0.02542	0.02968	0.06441	0.02701	0.009124	0.07305	0.09032	0.143	0.3563	0.4958	0.2479	0.08742	0.5831	0.7337	0.7024	0.7154	0.7498	0.5539	0.6699	0.7853	0.53	0.777	0.4783	0.7224	0.6923	0.8381	0.8279	0.8959	0.9005	0.9457	0.9029	0.9261	0.7488	0.9398	0.9446	0.9848	3.717e-05
GO:0045596_negative_regulation_of_cell_differentiation	0.0006734	6.519e-05	0.1194	0.07439	0.1097	0.05306	0.009824	0.1696	0.1589	0.1757	0.3952	0.4551	0.1583	0.2416	0.3366	0.7037	0.675	0.6521	0.7498	0.5539	0.7078	0.7837	0.5748	0.777	0.6481	0.7274	0.8229	0.8144	0.8279	0.8543	0.9005	0.8962	0.9029	0.9227	0.7519	0.9398	0.884	0.9848	3.717e-05
GO:0045666_positive_regulation_of_neuron_differentiation	0.1291	0.0005334	0.009281	0.2525	0.2114	0.03208	0.00397	0.01507	0.5636	0.4765	0.5585	0.5961	0.1728	0.1235	0.0368	0.7037	0.723	0.759	0.7556	0.6483	0.7152	0.7853	0.4978	0.6706	0.4955	0.6253	0.5877	0.8027	0.8611	0.8509	0.9005	0.9457	0.8982	0.9227	0.3257	0.9063	0.9446	0.9848	0.000136
GO:0051239_regulation_of_multicellular_organismal_process	0.0003766	6.519e-05	0.004013	0.06919	0.0004683	0.02786	0.0002025	0.0004274	0.1104	0.3321	0.613	0.6403	0.1848	0.1046	0.02571	0.7733	0.8045	0.7848	0.8237	0.7172	0.7721	0.7853	0.6378	0.7696	0.4797	0.7224	0.7896	0.8623	0.8611	0.9315	0.9062	0.9504	0.9165	0.9298	0.5114	0.9514	0.958	0.9848	3.717e-05
GO:0048870_cell_motility	0.005745	6.519e-05	0.1294	0.1379	0.2785	0.03456	0.02539	0.01395	0.1349	0.3176	0.4747	0.53	0.4265	0.3455	0.2779	0.6339	0.6368	0.6903	0.7059	0.5228	0.647	0.5994	0.5553	0.6295	0.5739	0.5336	0.7444	0.7707	0.7432	0.6913	0.8546	0.9277	0.8982	0.9015	0.7519	0.8848	0.9446	0.9848	3.717e-05
GO:0030198_extracellular_matrix_organization	0.1405	0.03361	0.108	0.1321	0.2733	0.2622	0.06154	0.09521	0.2267	0.351	0.5335	0.5365	0.2834	0.2991	0.2271	0.6976	0.6932	0.7221	0.7064	0.5973	0.648	0.7401	0.5656	0.6544	0.4284	0.4313	0.662	0.7742	0.7599	0.7965	0.8104	0.9277	0.8982	0.8447	0.6673	0.8544	0.9446	0.9848	0.006499
GO:0021695_cerebellar_cortex_development	0.04112	0.04132	0.08142	0.1608	0.4409	0.0467	0.064	0.04819	0.3497	0.5326	0.5013	0.6193	0.2159	0.2824	0.3366	0.6284	0.6759	0.6571	0.7208	0.6388	0.648	0.6142	0.4039	0.501	0.6187	0.6243	0.7569	0.6213	0.7545	0.8509	0.8528	0.9457	0.8472	0.9015	0.7348	0.8948	0.8864	0.9848	0.0008253
GO:0021953_central_nervous_system_neuron_differentiation	0.0001357	0.01134	0.09413	0.2706	0.4875	0.06718	0.1251	0.1975	0.3549	0.5082	0.6197	0.6189	0.4135	0.381	0.4121	0.7037	0.7168	0.7222	0.7059	0.6612	0.648	0.7112	0.4978	0.7334	0.6584	0.6912	0.8081	0.7742	0.8294	0.7771	0.8528	0.9245	0.8963	0.8988	0.6143	0.8368	0.9008	0.9848	0.01361
GO:0021954_central_nervous_system_neuron_development	0.002486	0.01877	0.05945	0.2946	0.5229	0.1625	0.05746	0.1612	0.3549	0.5212	0.6531	0.6189	0.417	0.3019	0.324	0.7421	0.7319	0.7438	0.7201	0.6859	0.648	0.7401	0.5748	0.7537	0.6481	0.7074	0.8317	0.7981	0.8279	0.7965	0.8309	0.9277	0.8982	0.9015	0.54	0.8097	0.9139	0.9848	0.02244
GO:0043586_tongue_development	0.2094	0.03216	0.1869	0.2086	0.4894	0.1944	0.03756	0.08301	0.431	0.5082	0.5163	0.6525	0.2305	0.379	0.3314	0.6474	0.7412	0.7164	0.7754	0.6483	0.6866	0.7865	0.4615	0.7085	0.7423	0.7903	0.7896	0.7925	0.8279	0.8509	0.9005	0.9245	0.8982	0.9261	0.6192	0.9063	0.9286	0.9848	0.005429
GO:0048536_spleen_development	0.08214	0.06612	0.1164	0.3025	0.06441	0.07932	0.04838	0.1696	0.5485	0.5524	0.6511	0.6525	0.3592	0.2618	0.212	0.7037	0.7502	0.7673	0.793	0.6456	0.648	0.7368	0.5736	0.7155	0.7134	0.7224	0.8004	0.8144	0.8524	0.8509	0.8862	0.9457	0.9019	0.9261	0.6192	0.8948	0.9466	0.9848	0.01598
GO:0008284_positive_regulation_of_cell_proliferation	0.03069	0.0003286	0.2195	0.2581	0.05838	0.1107	0.02236	0.1592	0.448	0.5212	0.6081	0.6189	0.4722	0.4941	0.3314	0.719	0.71	0.7513	0.793	0.7256	0.7906	0.7227	0.6816	0.6881	0.7066	0.8096	0.7954	0.8144	0.8453	0.8959	0.9062	0.9457	0.9029	0.9261	0.7956	0.9398	0.9466	0.9848	3.717e-05
GO:0001708_cell_fate_specification	0.005291	0.006639	0.07282	0.4162	0.2619	0.03647	0.04491	0.2019	0.1901	0.4822	0.5815	0.602	0.3365	0.4132	0.3492	0.7628	0.7605	0.754	0.7979	0.6904	0.8086	0.7133	0.6979	0.777	0.746	0.8106	0.8449	0.8377	0.8611	0.908	0.9062	0.9457	0.9029	0.9286	0.6143	0.9398	0.9446	0.9848	3.717e-05
GO:0048704_embryonic_skeletal_system_morphogenesis	0.06251	0.003337	0.04522	0.3304	0.3349	0.325	0.02492	0.05894	0.3549	0.5082	0.5585	0.6525	0.3219	0.3423	0.4153	0.7554	0.7766	0.7906	0.7979	0.7013	0.7779	0.733	0.7196	0.7892	0.6481	0.725	0.7744	0.8394	0.8775	0.908	0.9062	0.9483	0.9164	0.9286	0.763	0.9514	0.9482	0.9848	3.717e-05
GO:0032501_multicellular_organismal_process	0.01374	6.519e-05	0.0007734	0.0003536	0.0004683	0.007626	0.0002025	0.0004274	0.3727	0.7778	0.8494	0.8946	0.003585	0.01778	0.002317	0.8332	0.9096	0.91	0.915	0.8426	0.8615	0.7176	0.5748	0.8147	0.7659	0.8096	0.8935	0.9296	0.9521	0.9537	0.941	0.986	0.9686	0.9709	0.3542	0.9591	0.9736	0.9848	3.717e-05
GO:0002376_immune_system_process	0.5393	0.4676	0.2044	0.05087	0.4088	0.0903	0.001018	0.05665	0.63	0.8088	0.7502	0.8374	0.06327	0.1429	0.1066	0.7036	0.8111	0.7765	0.8357	0.7256	0.648	0.03801	0.2342	0.5125	0.6232	0.6207	0.8317	0.7707	0.8772	0.8509	0.8352	0.842	0.8472	0.9261	0.487	0.8674	0.9466	0.9848	0.02396
GO:0051100_negative_regulation_of_binding	0.08676	0.0537	0.1472	0.1013	0.484	0.2032	0.02063	0.1119	0.4959	0.5347	0.5725	0.6682	0.08442	0.2692	0.4498	0.6988	0.675	0.7154	0.7378	0.6612	0.6361	0.7853	0.287	0.579	0.4783	0.4052	0.7036	0.7707	0.8456	0.8509	0.8868	0.9457	0.854	0.8988	0.7538	0.5564	0.9466	0.9848	0.02949
GO:0043392_negative_regulation_of_DNA_binding	0.2026	0.03805	0.2006	0.1479	0.5565	0.2482	0.05262	0.1249	0.577	0.6109	0.6682	0.7178	0.1801	0.3691	0.4719	0.7234	0.7319	0.7508	0.793	0.7071	0.6623	0.8211	0.3788	0.6736	0.5834	0.4826	0.7954	0.8144	0.8611	0.8664	0.9005	0.9457	0.8982	0.9015	0.8048	0.5032	0.9466	0.9848	0.03225
GO:0022610_biological_adhesion	0.4093	0.0002757	0.01083	0.08122	0.7009	0.224	0.0004609	0.009688	0.6729	0.763	0.8324	0.824	0.06616	0.1322	0.1852	0.7807	0.8707	0.8458	0.8392	0.8164	0.8254	0.9003	0.4893	0.7745	0.6481	0.7166	0.8629	0.8635	0.9159	0.9315	0.9062	0.9793	0.9165	0.9298	0.7339	0.9514	0.9736	0.9848	0.001759
GO:0007155_cell_adhesion	0.4217	0.0002757	0.01136	0.08433	0.7102	0.2482	0.0004609	0.009574	0.6756	0.7702	0.8361	0.8314	0.07072	0.1388	0.1791	0.7895	0.8707	0.8462	0.8446	0.8164	0.8371	0.8906	0.5089	0.7789	0.6754	0.7224	0.8629	0.8635	0.9201	0.9315	0.9062	0.9845	0.9179	0.9348	0.7439	0.9514	0.9736	0.9848	0.00208
GO:0021536_diencephalon_development	0.03732	0.006308	0.1147	0.1815	0.08552	0.1437	0.1392	0.3488	0.3727	0.2178	0.2364	0.2909	0.4573	0.4804	0.5448	0.5102	0.496	0.5345	0.4693	0.4684	0.544	0.5926	0.5269	0.501	0.4309	0.4826	0.4058	0.6038	0.7025	0.6608	0.732	0.7208	0.7103	0.747	0.8362	0.7302	0.8464	0.9848	0.003699
GO:0051130_positive_regulation_of_cellular_component_organization	0.02628	0.007254	0.1907	0.1357	0.0681	0.1318	0.07421	0.498	0.367	0.1855	0.3063	0.3169	0.2264	0.3948	0.5806	0.5214	0.5107	0.5345	0.5634	0.5407	0.544	0.4792	0.6483	0.501	0.4598	0.5048	0.5198	0.6897	0.6642	0.7692	0.7198	0.7208	0.8059	0.7105	0.8113	0.7785	0.8025	0.9848	0.01043
GO:0007568_aging	0.002256	0.105	0.1433	0.0814	0.1438	0.1999	0.1463	0.6433	0.3906	0.1887	0.3432	0.4344	0.4196	0.3934	0.7765	0.5898	0.5373	0.5345	0.5299	0.5532	0.6223	0.5897	0.5508	0.501	0.4783	0.5021	0.5551	0.583	0.6713	0.7687	0.732	0.8738	0.7693	0.747	0.847	0.8037	0.8345	0.9848	0.01949
GO:0021983_pituitary_gland_development	0.07724	0.01635	0.2369	0.347	0.1054	0.2293	0.2587	0.4973	0.503	0.2036	0.3126	0.3876	0.5874	0.5913	0.6581	0.5857	0.5333	0.5844	0.5006	0.5233	0.648	0.6131	0.6176	0.579	0.4783	0.5273	0.4663	0.6483	0.7025	0.6572	0.749	0.8002	0.8289	0.7465	0.847	0.8097	0.8594	0.9848	0.003309
GO:0021884_forebrain_neuron_development	0.007563	0.04652	0.1411	0.4005	0.3038	0.105	0.1242	0.3165	0.2337	0.303	0.3924	0.402	0.3388	0.379	0.5507	0.5899	0.5333	0.5606	0.5596	0.5353	0.593	0.6131	0.4039	0.5755	0.5106	0.531	0.5499	0.6125	0.6835	0.6697	0.7208	0.7765	0.7663	0.8593	0.7727	0.7142	0.6636	0.9848	0.08466
GO:0002089_lens_morphogenesis_in_camera-type_eye	0.05716	0.02154	0.1757	0.3336	0.219	0.1772	0.1919	0.3488	0.1348	0.2501	0.3003	0.2952	0.4512	0.4671	0.5921	0.5728	0.5654	0.5707	0.5634	0.4595	0.648	0.7368	0.4744	0.6533	0.4937	0.5491	0.5877	0.6188	0.6835	0.6734	0.7789	0.8435	0.8397	0.8739	0.7662	0.8595	0.7899	0.9848	0.02778
GO:0007507_heart_development	0.001145	0.001441	0.08015	0.246	0.129	0.09891	0.1915	0.4997	0.3511	0.05455	0.1514	0.2853	0.4984	0.4946	0.7354	0.413	0.4431	0.4671	0.569	0.3964	0.6307	0.6453	0.4548	0.501	0.6703	0.6728	0.7261	0.583	0.6764	0.7564	0.7973	0.7454	0.7546	0.8667	0.847	0.8948	0.7776	0.9848	3.717e-05
GO:0001709_cell_fate_determination	0.001637	0.03095	0.3323	0.2521	0.181	0.07389	0.1117	0.3722	0.2351	0.2604	0.2767	0.4693	0.2881	0.302	0.6581	0.5898	0.5333	0.5345	0.6461	0.4504	0.6223	0.478	0.365	0.5797	0.7033	0.7154	0.8229	0.6246	0.7012	0.6503	0.8309	0.8894	0.8472	0.8666	0.7538	0.9063	0.8505	0.9848	0.000136
GO:0048568_embryonic_organ_development	0.006111	0.01621	0.5762	0.133	0.2785	0.2354	0.1731	0.4706	0.4629	0.1855	0.2448	0.4572	0.3932	0.4784	0.67	0.5106	0.5299	0.5345	0.6131	0.3658	0.648	0.5756	0.6002	0.5773	0.719	0.7154	0.7447	0.6038	0.7051	0.6798	0.8147	0.8406	0.8472	0.8988	0.8753	0.9383	0.8377	0.9848	3.717e-05
GO:0010769_regulation_of_cell_morphogenesis_involved_in_differentiation	4.072e-05	0.002709	0.07121	0.1383	0.1929	0.1629	0.07606	0.125	0.1417	0.1815	0.3637	0.4551	0.2288	0.3362	0.5988	0.6846	0.6058	0.6818	0.7556	0.5347	0.647	0.562	0.5981	0.7151	0.7077	0.7903	0.7748	0.7925	0.6652	0.8509	0.8862	0.8633	0.8982	0.9015	0.847	0.9233	0.9008	0.9848	0.0001063
GO:0045168_cell-cell_signaling_involved_in_cell_fate_specification	0.01441	0.02783	0.1465	0.2433	0.3041	0.04702	0.1319	0.2468	0.09575	0.3013	0.3907	0.4572	0.4498	0.3959	0.5405	0.7036	0.6368	0.6763	0.6492	0.5043	0.6699	0.4035	0.6169	0.7085	0.6481	0.7154	0.7444	0.7797	0.6848	0.8175	0.8546	0.8738	0.8736	0.8988	0.7439	0.8544	0.8594	0.9848	3.717e-05
GO:0031128_developmental_induction	0.01441	0.02783	0.1465	0.2433	0.3041	0.04702	0.1319	0.2468	0.09575	0.3013	0.3907	0.4572	0.4498	0.3959	0.5405	0.7036	0.6368	0.6763	0.6492	0.5043	0.6699	0.4035	0.6169	0.7085	0.6481	0.7154	0.7444	0.7797	0.6848	0.8175	0.8546	0.8738	0.8736	0.8988	0.7439	0.8544	0.8594	0.9848	3.717e-05
GO:0060350_endochondral_bone_morphogenesis	0.01358	0.02221	0.1906	0.3421	0.2678	0.2153	0.05686	0.06391	0.2452	0.1906	0.4083	0.4301	0.5597	0.5188	0.5562	0.7037	0.6291	0.7056	0.6457	0.5539	0.744	0.645	0.7603	0.7816	0.4955	0.6165	0.6021	0.8144	0.7545	0.8509	0.8546	0.8962	0.8982	0.8667	0.7791	0.9063	0.9446	0.9848	0.0008133
GO:0007409_axonogenesis	4.072e-05	6.519e-05	0.4039	0.1485	0.005932	0.007023	0.02236	0.3463	0.176	0.1257	0.3008	0.465	0.4009	0.2604	0.78	0.7037	0.6117	0.7154	0.6218	0.5379	0.7492	0.5471	0.6002	0.7473	0.6164	0.7147	0.6034	0.8381	0.8279	0.8353	0.8862	0.9245	0.9029	0.9015	0.8362	0.9312	0.9466	0.9848	3.717e-05
GO:0032989_cellular_component_morphogenesis	4.072e-05	6.519e-05	0.3168	0.2945	0.05657	0.01723	0.05262	0.3811	0.2602	0.09659	0.2323	0.451	0.4722	0.2959	0.6739	0.684	0.5333	0.6763	0.5699	0.4745	0.7176	0.5471	0.6291	0.7403	0.6232	0.6912	0.7108	0.8027	0.8279	0.7687	0.8988	0.8962	0.9029	0.8474	0.8362	0.9375	0.9352	0.9848	3.717e-05
GO:0000902_cell_morphogenesis	4.072e-05	6.519e-05	0.3554	0.2739	0.06893	0.01075	0.06639	0.444	0.2452	0.1335	0.2698	0.4551	0.5097	0.3523	0.7326	0.7068	0.5471	0.7152	0.5844	0.5165	0.7388	0.5276	0.6947	0.7473	0.6481	0.7166	0.7485	0.8144	0.8279	0.7889	0.9005	0.8962	0.9029	0.8973	0.8302	0.9375	0.9446	0.9848	3.717e-05
GO:0021872_generation_of_neurons_in_the_forebrain	0.006596	0.1446	0.01044	0.5604	0.1517	0.1944	0.4215	0.6515	0.1494	0.1855	0.3003	0.1955	0.6404	0.6186	0.7916	0.688	0.5421	0.5886	0.5244	0.5973	0.8021	0.7368	0.627	0.7473	0.719	0.7269	0.5565	0.7707	0.4588	0.7304	0.7677	0.5914	0.8568	0.8407	0.8755	0.8948	0.7899	0.9848	0.1198
GO:0021879_forebrain_neuron_differentiation	0.008958	0.1023	0.08158	0.5141	0.3014	0.2482	0.2298	0.4872	0.1237	0.2877	0.4083	0.2856	0.5955	0.5456	0.6888	0.7037	0.6062	0.5886	0.6131	0.6497	0.7959	0.7837	0.6715	0.7537	0.7635	0.7269	0.7569	0.7784	0.5301	0.806	0.8528	0.712	0.8982	0.8988	0.8755	0.9063	0.8424	0.9848	0.01349
GO:0008283_cell_proliferation	0.09028	0.148	0.2741	0.2068	0.2857	0.2622	0.03735	0.04903	0.5868	0.314	0.3003	0.4693	0.4729	0.3808	0.5448	0.6284	0.5089	0.5606	0.5092	0.4745	0.544	0.7355	0.5748	0.7473	0.5404	0.6432	0.7261	0.6038	0.7051	0.5757	0.7198	0.6602	0.7745	0.662	0.7124	0.7142	0.7875	0.9848	0.02909
GO:0048593_camera-type_eye_morphogenesis	0.021	0.003937	0.5198	0.4064	0.2876	0.2073	0.02539	0.1993	0.3698	0.3335	0.479	0.5606	0.2479	0.4622	0.5806	0.5976	0.5984	0.6818	0.6131	0.4876	0.739	0.7355	0.5259	0.7416	0.6481	0.6715	0.6833	0.7707	0.8453	0.7149	0.8528	0.8962	0.8513	0.8917	0.8113	0.9306	0.9008	0.9848	0.002019
GO:0021548_pons_development	0.1196	0.03216	0.3381	0.1945	0.3367	0.1638	0.06457	0.298	0.4762	0.5353	0.5178	0.6572	0.2649	0.4084	0.4032	0.6856	0.6368	0.7152	0.6845	0.67	0.6699	0.7671	0.53	0.6791	0.5499	0.5557	0.6993	0.7707	0.8341	0.8229	0.845	0.9277	0.8851	0.8908	0.8113	0.8848	0.9323	0.9848	0.03365
GO:0014050_negative_regulation_of_glutamate_secretion	0.1244	0.04772	0.307	0.3153	0.3125	0.2568	0.1251	0.1961	0.3769	0.5326	0.479	0.7178	0.2288	0.4227	0.5405	0.7036	0.71	0.7152	0.7603	0.6483	0.6778	0.7119	0.4083	0.6706	0.6851	0.7166	0.7845	0.7707	0.7599	0.8301	0.8546	0.9277	0.8472	0.8988	0.7519	0.8764	0.9067	0.9848	0.007809
GO:0008045_motor_axon_guidance	0.05546	0.01134	0.3499	0.3581	0.4276	0.3418	0.1835	0.3025	0.2919	0.5212	0.5288	0.6018	0.4498	0.2835	0.5806	0.6831	0.7292	0.6492	0.7378	0.6118	0.6778	0.5944	0.3737	0.6683	0.6481	0.7224	0.8018	0.7707	0.6848	0.8223	0.8546	0.8962	0.8316	0.9052	0.7219	0.8948	0.8594	0.9848	0.01307
GO:0048168_regulation_of_neuronal_synaptic_plasticity	0.09231	0.02589	0.5988	0.254	0.2399	0.4494	0.1326	0.2144	0.4533	0.4715	0.5414	0.621	0.4984	0.2963	0.7337	0.6284	0.6455	0.628	0.6827	0.6208	0.648	0.7368	0.5692	0.6056	0.4955	0.5065	0.7936	0.7222	0.8279	0.8292	0.8528	0.9245	0.8304	0.8988	0.8362	0.8948	0.8594	0.9848	0.001759
GO:0003002_regionalization	4.072e-05	6.519e-05	0.01059	0.1143	0.009432	0.0512	0.007052	0.03086	0.431	0.1757	0.3907	0.4551	0.2952	0.4474	0.5781	0.704	0.7469	0.725	0.7979	0.7172	0.8137	0.7916	0.5771	0.7537	0.719	0.8285	0.7744	0.8252	0.8759	0.9152	0.9062	0.9457	0.9164	0.9286	0.847	0.9514	0.9466	0.9848	3.717e-05
GO:0007389_pattern_specification_process	4.072e-05	6.519e-05	0.02825	0.1481	0.003559	0.03402	0.01276	0.03366	0.3699	0.199	0.442	0.4958	0.3669	0.495	0.5921	0.7564	0.7976	0.7816	0.8181	0.7497	0.8547	0.7837	0.6483	0.787	0.7659	0.8285	0.8341	0.8407	0.8918	0.9292	0.9252	0.9483	0.9165	0.9298	0.8681	0.9514	0.9489	0.9848	3.717e-05
GO:0009892_negative_regulation_of_metabolic_process	4.072e-05	0.06271	0.01493	0.1202	0.1814	0.454	0.008911	0.02069	0.5081	0.1862	0.3637	0.4665	0.2505	0.4804	0.5117	0.647	0.5986	0.628	0.7605	0.6306	0.7779	0.8002	0.6176	0.7334	0.7659	0.8289	0.8449	0.7707	0.8279	0.8509	0.8901	0.9277	0.8513	0.9072	0.847	0.9398	0.8594	0.9848	3.717e-05
GO:0031324_negative_regulation_of_cellular_metabolic_process	4.072e-05	0.05217	0.007252	0.1025	0.207	0.3812	0.01993	0.04364	0.4536	0.167	0.3432	0.4572	0.2887	0.5592	0.5677	0.6587	0.57	0.6204	0.7622	0.6279	0.7869	0.7759	0.689	0.7437	0.7659	0.8366	0.8449	0.7797	0.7932	0.8509	0.9005	0.9277	0.8982	0.9019	0.847	0.9459	0.8728	0.9848	3.717e-05
GO:0010605_negative_regulation_of_macromolecule_metabolic_process	4.072e-05	0.1118	0.009463	0.1041	0.1349	0.4893	0.01414	0.02971	0.5118	0.1603	0.3475	0.4551	0.3365	0.5511	0.4855	0.6831	0.588	0.6597	0.7622	0.5848	0.804	0.7962	0.7144	0.7649	0.7694	0.8696	0.8561	0.7742	0.8279	0.8509	0.8973	0.8962	0.8851	0.9031	0.847	0.9416	0.8521	0.9848	3.717e-05
GO:0045934_negative_regulation_of_nucleobase,_nucleoside,_nucleotide_and_nucleic_acid_metabolic_process	4.072e-05	0.1446	0.01802	0.2945	0.3128	0.2451	0.04089	0.04558	0.309	0.1838	0.3637	0.4958	0.4832	0.4896	0.5201	0.7068	0.6291	0.7154	0.7979	0.5347	0.804	0.7671	0.7628	0.7882	0.7845	0.872	0.8629	0.8381	0.7881	0.8509	0.9005	0.9229	0.8993	0.9015	0.8362	0.9514	0.9067	0.9848	3.717e-05
GO:0051172_negative_regulation_of_nitrogen_compound_metabolic_process	4.072e-05	0.1402	0.03217	0.3007	0.3418	0.2622	0.04233	0.04903	0.3549	0.1967	0.3959	0.5212	0.4832	0.5218	0.5448	0.7068	0.6455	0.7154	0.7979	0.5452	0.8086	0.7837	0.7573	0.787	0.7848	0.8756	0.8629	0.8381	0.8279	0.8509	0.9062	0.9277	0.8982	0.9166	0.8399	0.9514	0.9069	0.9848	3.717e-05
GO:0010629_negative_regulation_of_gene_expression	4.072e-05	0.04307	0.007215	0.3268	0.3125	0.2952	0.02854	0.01335	0.4001	0.1946	0.4397	0.5456	0.5517	0.5775	0.4542	0.7554	0.7168	0.7513	0.8181	0.6045	0.8318	0.8127	0.78	0.7904	0.8133	0.8852	0.8646	0.8394	0.8383	0.8728	0.9062	0.9277	0.9029	0.9261	0.847	0.9514	0.926	0.9848	3.717e-05
GO:0043487_regulation_of_RNA_stability	0.03939	0.6224	0.2147	0.1479	0.3677	0.6122	0.4519	0.5663	0.7089	0.3773	0.4312	0.4693	0.4722	0.4132	0.6581	0.5373	0.5333	0.5788	0.6126	0.5496	0.647	0.7551	0.4344	0.5405	0.4955	0.5486	0.6833	0.6038	0.7932	0.6646	0.732	0.7517	0.6352	0.7876	0.7519	0.4848	0.6978	0.7182	0.3935
GO:0042592_homeostatic_process	0.05207	0.0063	0.7626	0.228	0.2872	0.2576	0.3264	0.6976	0.3652	0.3685	0.4644	0.5488	0.4009	0.3841	0.689	0.413	0.5338	0.4778	0.6941	0.5476	0.5815	0.5944	0.4079	0.3495	0.497	0.5249	0.7118	0.575	0.7432	0.7687	0.8424	0.8962	0.6542	0.8593	0.847	0.8592	0.8345	0.9848	0.0007312
GO:0048259_regulation_of_receptor-mediated_endocytosis	0.1975	0.03417	0.379	0.3914	0.2394	0.4295	0.3077	0.5064	0.6776	0.3204	0.4994	0.472	0.5397	0.6332	0.6034	0.4524	0.5283	0.5606	0.5769	0.5545	0.6307	0.5944	0.5047	0.501	0.4783	0.5249	0.5379	0.6038	0.7545	0.6572	0.7645	0.8444	0.6816	0.6938	0.7549	0.738	0.7354	0.956	0.1058
GO:0045807_positive_regulation_of_endocytosis	0.3652	0.02873	0.6198	0.2268	0.3065	0.4947	0.387	0.6433	0.7354	0.5315	0.4747	0.6633	0.4148	0.6832	0.6532	0.4152	0.5333	0.4466	0.7116	0.6646	0.647	0.7092	0.5508	0.3105	0.5626	0.5486	0.615	0.5783	0.7932	0.6697	0.8224	0.8962	0.6542	0.8025	0.847	0.8595	0.7354	0.8443	0.1612
GO:0003007_heart_morphogenesis	0.03732	0.002853	0.2522	0.4818	0.1844	0.3752	0.3808	0.5176	0.6219	0.2348	0.2011	0.465	0.6823	0.6676	0.7811	0.4935	0.4758	0.5271	0.5092	0.5379	0.6565	0.7285	0.5771	0.501	0.6481	0.6243	0.6888	0.5917	0.6735	0.6712	0.7973	0.6342	0.6816	0.8593	0.8755	0.8848	0.7296	0.9848	0.0008253
GO:0044087_regulation_of_cellular_component_biogenesis	0.05476	0.07364	0.01418	0.2756	0.1183	0.5915	0.5628	0.7359	0.4658	0.1971	0.4083	0.3348	0.6393	0.7495	0.8605	0.5898	0.5333	0.5465	0.5244	0.7256	0.7721	0.7189	0.7628	0.6155	0.7131	0.7224	0.7569	0.7364	0.6089	0.7873	0.8303	0.6339	0.8362	0.8908	0.8755	0.8948	0.6709	0.9848	0.01307
GO:0032535_regulation_of_cellular_component_size	0.1365	0.006639	0.1224	0.1948	0.07491	0.2817	0.5998	0.7289	0.63	0.1971	0.4065	0.4498	0.6623	0.7214	0.8581	0.6	0.5333	0.606	0.5299	0.6551	0.6945	0.7282	0.7726	0.7518	0.5106	0.6138	0.7748	0.7707	0.7432	0.6581	0.8286	0.7681	0.8851	0.747	0.8868	0.8948	0.7899	0.9848	0.009385
GO:0090066_regulation_of_anatomical_structure_size	0.107	0.006385	0.1286	0.2565	0.06893	0.2622	0.5911	0.6636	0.5919	0.167	0.37	0.4503	0.6811	0.7472	0.8236	0.6734	0.5421	0.659	0.5244	0.6483	0.7436	0.7837	0.7726	0.7537	0.5459	0.6509	0.7896	0.7707	0.7103	0.6646	0.8446	0.7208	0.8982	0.7814	0.8755	0.8948	0.8345	0.9848	0.001023
GO:0006349_regulation_of_gene_expression_by_genetic_imprinting	0.1083	0.007302	0.05997	0.2054	0.3314	0.2936	0.5794	0.7071	0.6756	0.1887	0.4083	0.4551	0.7547	0.8035	0.7896	0.6589	0.5422	0.5606	0.5769	0.6612	0.8486	0.7865	0.7736	0.7518	0.7659	0.7372	0.7118	0.7707	0.7192	0.7873	0.8362	0.6339	0.8093	0.8954	0.9156	0.8991	0.7194	0.9848	0.03066
GO:0060415_muscle_tissue_morphogenesis	0.1383	0.003791	0.2932	0.4516	0.0145	0.4154	0.4686	0.7117	0.6782	0.2957	0.4083	0.5886	0.6648	0.6536	0.8781	0.5106	0.5333	0.5271	0.5634	0.67	0.6804	0.7837	0.5748	0.501	0.6164	0.4313	0.7444	0.6302	0.7	0.7291	0.8424	0.6562	0.7922	0.8908	0.8977	0.8948	0.7425	0.9848	0.01043
GO:0055008_cardiac_muscle_tissue_morphogenesis	0.1383	0.003791	0.2932	0.4516	0.0145	0.4154	0.4686	0.7117	0.6782	0.2957	0.4083	0.5886	0.6648	0.6536	0.8781	0.5106	0.5333	0.5271	0.5634	0.67	0.6804	0.7837	0.5748	0.501	0.6164	0.4313	0.7444	0.6302	0.7	0.7291	0.8424	0.6562	0.7922	0.8908	0.8977	0.8948	0.7425	0.9848	0.01043
GO:0055010_ventricular_cardiac_muscle_tissue_morphogenesis	0.1287	0.02671	0.3375	0.4859	0.02418	0.5571	0.5827	0.8142	0.7066	0.4053	0.4582	0.6374	0.7289	0.7214	0.8772	0.6284	0.6054	0.5572	0.6646	0.7256	0.7779	0.8192	0.6947	0.6056	0.719	0.6114	0.8018	0.7052	0.7599	0.7965	0.8969	0.7681	0.8472	0.9015	0.9202	0.9398	0.7963	0.9848	0.02886
GO:0030036_actin_cytoskeleton_organization	0.001895	0.01301	0.1482	0.1562	0.3167	0.3912	0.4183	0.7574	0.5636	0.2581	0.3959	0.4903	0.652	0.7495	0.7035	0.6339	0.5333	0.5865	0.6014	0.7142	0.7779	0.8127	0.7628	0.5874	0.7134	0.7145	0.7261	0.7356	0.7286	0.689	0.8777	0.8444	0.8982	0.8593	0.8977	0.9375	0.4063	0.9848	0.0007954
GO:0030029_actin_filament-based_process	0.01714	0.0116	0.2452	0.2529	0.4	0.4295	0.5067	0.7982	0.5727	0.3114	0.4582	0.5456	0.6995	0.7496	0.7248	0.7037	0.57	0.6312	0.6131	0.7538	0.8086	0.8178	0.7726	0.6397	0.719	0.7074	0.7555	0.7707	0.7545	0.7496	0.8862	0.8738	0.8982	0.8988	0.911	0.9398	0.5841	0.9848	0.002002
GO:0016043_cellular_component_organization	4.072e-05	0.1756	0.02578	0.3749	0.2664	0.5855	0.5669	0.8	0.6081	0.3149	0.431	0.5681	0.7732	0.7322	0.5238	0.6988	0.5471	0.6703	0.6918	0.6967	0.8224	0.8445	0.7795	0.7537	0.7659	0.7968	0.8449	0.8135	0.8279	0.8344	0.9062	0.872	0.8982	0.9166	0.9008	0.7033	0.4814	0.9848	0.0003881
GO:0010324_membrane_invagination	0.001345	0.02066	0.3362	0.5413	0.4574	0.5716	0.5423	0.6742	0.7826	0.4354	0.5178	0.6189	0.7459	0.8035	0.7906	0.6665	0.6725	0.7152	0.7378	0.7279	0.8547	0.7853	0.7628	0.5755	0.7925	0.8096	0.8341	0.7797	0.8611	0.8509	0.9062	0.9229	0.8982	0.9261	0.9008	0.6732	0.3526	0.9344	0.000413
GO:0006897_endocytosis	0.001345	0.02066	0.3362	0.5413	0.4574	0.5716	0.5423	0.6742	0.7826	0.4354	0.5178	0.6189	0.7459	0.8035	0.7906	0.6665	0.6725	0.7152	0.7378	0.7279	0.8547	0.7853	0.7628	0.5755	0.7925	0.8096	0.8341	0.7797	0.8611	0.8509	0.9062	0.9229	0.8982	0.9261	0.9008	0.6732	0.3526	0.9344	0.000413
GO:0030278_regulation_of_ossification	0.0007968	0.01877	0.2761	0.2946	0.1793	0.2919	0.08362	0.2917	0.1207	0.1239	0.3003	0.5092	0.2773	0.5972	0.6297	0.7337	0.71	0.7152	0.7498	0.5539	0.8225	0.7759	0.7181	0.7725	0.7657	0.8192	0.7744	0.8381	0.8381	0.8509	0.9005	0.9277	0.8982	0.9286	0.847	0.9514	0.9446	0.9848	3.717e-05
GO:0007411_axon_guidance	7.319e-05	6.519e-05	0.3797	0.4089	0.2399	0.01002	0.03913	0.2574	0.2787	0.3004	0.4747	0.5606	0.5141	0.4982	0.7354	0.7328	0.7165	0.7333	0.7162	0.6388	0.8065	0.7759	0.6378	0.7649	0.719	0.7685	0.7569	0.8381	0.8491	0.8509	0.9005	0.9393	0.9029	0.9261	0.847	0.9385	0.9466	0.9848	3.717e-05
GO:0035295_tube_development	4.072e-05	6.519e-05	0.4122	0.3421	0.1136	0.1102	0.1648	0.4027	0.2103	0.1761	0.479	0.402	0.6069	0.6551	0.6581	0.7036	0.71	0.6903	0.7378	0.6569	0.8086	0.7245	0.7237	0.7473	0.7635	0.7968	0.8561	0.8144	0.8279	0.8959	0.9062	0.9308	0.9029	0.9286	0.8815	0.9514	0.9446	0.9848	3.717e-05
GO:0000904_cell_morphogenesis_involved_in_differentiation	4.072e-05	6.519e-05	0.5479	0.2033	0.02487	0.01298	0.05037	0.4521	0.1957	0.1838	0.3637	0.5456	0.527	0.4059	0.7947	0.7493	0.6368	0.745	0.7083	0.5845	0.7869	0.5944	0.6951	0.7649	0.6703	0.7269	0.7569	0.8381	0.8453	0.8509	0.9062	0.9457	0.9164	0.9031	0.847	0.9398	0.9466	0.9848	3.717e-05
GO:0048666_neuron_development	4.072e-05	6.519e-05	0.3719	0.1311	0.0145	0.002611	0.0119	0.4027	0.2709	0.1761	0.3907	0.5606	0.5895	0.4893	0.7755	0.7379	0.6455	0.725	0.7201	0.6118	0.8052	0.6253	0.7373	0.7649	0.7373	0.7685	0.7447	0.8406	0.8453	0.8377	0.9062	0.9457	0.9164	0.9261	0.8755	0.9471	0.9466	0.9848	3.717e-05
GO:0032990_cell_part_morphogenesis	4.072e-05	6.519e-05	0.3719	0.1534	0.05953	0.02692	0.1087	0.5206	0.3038	0.199	0.3637	0.4958	0.6167	0.4746	0.7857	0.7234	0.6291	0.7154	0.6941	0.5845	0.7994	0.5756	0.7389	0.7649	0.719	0.7903	0.7447	0.8381	0.8453	0.8509	0.9005	0.9229	0.9029	0.9031	0.847	0.9398	0.9446	0.9848	3.717e-05
GO:0048858_cell_projection_morphogenesis	4.072e-05	6.519e-05	0.414	0.1479	0.04345	0.02692	0.1006	0.5176	0.2747	0.2063	0.4086	0.5417	0.6001	0.4954	0.7989	0.7493	0.6855	0.7513	0.7247	0.6306	0.8052	0.5756	0.7389	0.7737	0.7285	0.8012	0.7569	0.8407	0.8456	0.8664	0.9005	0.9337	0.9164	0.9226	0.847	0.9398	0.9466	0.9848	3.717e-05
GO:0048812_neuron_projection_morphogenesis	4.072e-05	6.519e-05	0.4513	0.1485	0.01124	0.02154	0.05976	0.4785	0.2734	0.2333	0.4257	0.5488	0.5696	0.4746	0.8042	0.7511	0.6904	0.759	0.7378	0.6483	0.8086	0.6253	0.7389	0.777	0.719	0.7968	0.7569	0.8406	0.8456	0.8728	0.9062	0.9457	0.9164	0.9227	0.847	0.9398	0.9466	0.9848	3.717e-05
GO:0048667_cell_morphogenesis_involved_in_neuron_differentiation	4.072e-05	6.519e-05	0.4554	0.1858	0.01683	0.02753	0.07204	0.4706	0.3055	0.2412	0.442	0.5681	0.6001	0.513	0.8011	0.7554	0.7042	0.7606	0.7498	0.6646	0.8225	0.6142	0.7628	0.78	0.7572	0.8096	0.7845	0.8445	0.8456	0.877	0.9062	0.9457	0.9164	0.9261	0.8681	0.9514	0.9466	0.9848	3.717e-05
GO:0031175_neuron_projection_development	4.072e-05	6.519e-05	0.4977	0.1959	0.0145	0.04183	0.1097	0.6073	0.4033	0.2759	0.4397	0.6189	0.6995	0.6612	0.8417	0.7733	0.689	0.7513	0.7498	0.7071	0.8486	0.7202	0.7975	0.787	0.7815	0.8285	0.8286	0.844	0.8611	0.877	0.9062	0.9457	0.9164	0.9286	0.8927	0.9514	0.9466	0.9848	3.717e-05
GO:0035195_gene_silencing_by_miRNA	0.02057	0.1996	0.1521	0.3709	0.3742	0.4068	0.1617	0.1803	0.2267	0.3136	0.4853	0.4572	0.6462	0.5577	0.4959	0.7493	0.6904	0.7205	0.7498	0.5449	0.7385	0.6441	0.7634	0.7892	0.7812	0.8285	0.8341	0.8255	0.7002	0.7932	0.7449	0.8633	0.8851	0.8988	0.7519	0.9063	0.8345	0.9848	0.04245
GO:0035194_posttranscriptional_gene_silencing_by_RNA	0.03421	0.2405	0.2286	0.4704	0.4409	0.5012	0.3904	0.4259	0.3497	0.3956	0.5054	0.4989	0.7289	0.6998	0.6532	0.7511	0.689	0.7222	0.7605	0.5539	0.7731	0.7202	0.7978	0.7892	0.8052	0.8696	0.8449	0.8192	0.6927	0.7873	0.6338	0.7983	0.8472	0.8988	0.8399	0.9063	0.7308	0.9848	0.1775
GO:0016441_posttranscriptional_gene_silencing	0.03421	0.2405	0.2286	0.4704	0.4409	0.5012	0.3904	0.4259	0.3497	0.3956	0.5054	0.4989	0.7289	0.6998	0.6532	0.7511	0.689	0.7222	0.7605	0.5539	0.7731	0.7202	0.7978	0.7892	0.8052	0.8696	0.8449	0.8192	0.6927	0.7873	0.6338	0.7983	0.8472	0.8988	0.8399	0.9063	0.7308	0.9848	0.1775
GO:0021987_cerebral_cortex_development	0.04267	0.09067	0.02578	0.1479	0.3975	0.3583	0.3787	0.542	0.1719	0.4243	0.5265	0.4665	0.6623	0.5365	0.5921	0.6988	0.6197	0.5707	0.71	0.6816	0.7492	0.6891	0.6827	0.7225	0.7659	0.7465	0.8449	0.7742	0.7092	0.8294	0.9005	0.8444	0.8982	0.9166	0.847	0.937	0.8288	0.9848	0.06164
GO:0021543_pallium_development	0.002546	0.06471	0.031	0.2034	0.4361	0.3021	0.3624	0.5176	0.3044	0.5021	0.6297	0.5092	0.7336	0.495	0.5562	0.7703	0.7412	0.725	0.7498	0.7411	0.8318	0.8127	0.7706	0.7892	0.7845	0.8096	0.8629	0.8381	0.8279	0.8728	0.9062	0.8962	0.9029	0.9286	0.847	0.9514	0.8863	0.9848	0.03353
GO:0009952_anterior/posterior_pattern_formation	4.072e-05	6.519e-05	0.0583	0.2946	0.0145	0.09838	0.07204	0.125	0.5881	0.2735	0.4542	0.5977	0.4984	0.5218	0.6749	0.7554	0.7915	0.7606	0.8246	0.7509	0.8486	0.8127	0.7271	0.7892	0.7694	0.878	0.8145	0.8394	0.8786	0.9247	0.9163	0.9457	0.9164	0.9298	0.8681	0.9514	0.9466	0.9848	3.717e-05
GO:0048598_embryonic_morphogenesis	4.072e-05	6.519e-05	0.1325	0.3822	0.07945	0.2222	0.02216	0.1282	0.4703	0.167	0.5013	0.4572	0.5605	0.7175	0.5921	0.7619	0.7791	0.759	0.8122	0.7869	0.8548	0.833	0.78	0.7892	0.7815	0.8522	0.8617	0.85	0.8724	0.9315	0.9343	0.9481	0.9291	0.9338	0.9156	0.9591	0.9482	0.9848	3.717e-05
GO:0007169_transmembrane_receptor_protein_tyrosine_kinase_signaling_pathway	4.072e-05	6.519e-05	0.03981	0.3379	0.3459	0.03227	0.05881	0.2057	0.431	0.4145	0.5887	0.5606	0.5661	0.6826	0.6581	0.7116	0.6964	0.6903	0.7642	0.7308	0.7721	0.7368	0.6378	0.674	0.7815	0.8012	0.8449	0.8027	0.8279	0.8509	0.9062	0.9254	0.8982	0.9286	0.8681	0.9398	0.9446	0.9848	3.717e-05
GO:0007167_enzyme_linked_receptor_protein_signaling_pathway	4.072e-05	6.519e-05	0.007076	0.3149	0.3334	0.0618	0.08063	0.144	0.6047	0.4497	0.7212	0.6189	0.7051	0.7322	0.6902	0.7807	0.7906	0.7837	0.8182	0.8164	0.8592	0.8532	0.7795	0.7807	0.7848	0.8199	0.8704	0.8454	0.8787	0.9172	0.9343	0.9457	0.9165	0.9382	0.8968	0.9514	0.9489	0.9848	3.717e-05
GO:0021537_telencephalon_development	0.004324	0.004494	0.1163	0.3649	0.3524	0.07389	0.09763	0.4	0.2003	0.4377	0.5259	0.5206	0.6623	0.3714	0.4715	0.7554	0.7412	0.7361	0.7378	0.6931	0.804	0.788	0.7229	0.7807	0.7538	0.7685	0.8257	0.8381	0.8279	0.8509	0.9062	0.8962	0.9029	0.9261	0.8113	0.9398	0.926	0.9848	0.002002
GO:0021761_limbic_system_development	0.0076	0.02325	0.3437	0.5597	0.3406	0.2265	0.2602	0.478	0.4221	0.4834	0.6025	0.5508	0.6976	0.4305	0.6271	0.7744	0.7605	0.7836	0.7201	0.7256	0.8366	0.7837	0.7322	0.7892	0.7659	0.7968	0.812	0.8381	0.8453	0.877	0.9062	0.9245	0.9029	0.9261	0.8124	0.9473	0.9446	0.9848	0.005928
GO:0048729_tissue_morphogenesis	4.072e-05	6.519e-05	0.2814	0.4369	0.006974	0.1102	0.4973	0.709	0.4924	0.147	0.4789	0.3434	0.8106	0.8016	0.9018	0.7493	0.7308	0.7152	0.7116	0.7256	0.8621	0.8211	0.815	0.7789	0.7732	0.8096	0.8352	0.8381	0.8456	0.905	0.9122	0.8962	0.9164	0.9298	0.949	0.9514	0.9424	0.9848	3.717e-05
GO:0042551_neuron_maturation	0.02984	0.0267	0.2278	0.2994	0.375	0.327	0.6652	0.6976	0.37	0.3281	0.562	0.5481	0.7897	0.7962	0.8158	0.7437	0.6455	0.7154	0.7556	0.7411	0.8412	0.8127	0.8207	0.7892	0.7815	0.8096	0.8317	0.8381	0.8279	0.8353	0.9062	0.8962	0.9029	0.9247	0.9142	0.9398	0.9008	0.9848	0.0315
GO:0016055_Wnt_receptor_signaling_pathway	4.072e-05	0.001271	0.2601	0.4536	0.2241	0.4507	0.6206	0.7154	0.5969	0.3641	0.482	0.5296	0.7724	0.7707	0.8893	0.7733	0.7168	0.7154	0.7235	0.7497	0.7869	0.7759	0.7739	0.7793	0.7134	0.8192	0.8229	0.8027	0.8279	0.8959	0.9005	0.8962	0.8982	0.9015	0.8755	0.9375	0.8863	0.9848	0.002995
GO:0048332_mesoderm_morphogenesis	7.319e-05	0.002455	0.1907	0.5269	0.09529	0.3314	0.5634	0.6002	0.577	0.2647	0.5815	0.6189	0.8078	0.8035	0.8861	0.7554	0.7606	0.745	0.7378	0.7769	0.8615	0.9004	0.8002	0.7892	0.7659	0.7897	0.8229	0.8407	0.8456	0.8844	0.9062	0.8962	0.9029	0.9286	0.9322	0.9514	0.9446	0.9848	0.001312
GO:0001704_formation_of_primary_germ_layer	0.0003151	0.003895	0.3675	0.5909	0.1393	0.327	0.5356	0.6206	0.6047	0.2925	0.6081	0.6189	0.7934	0.8001	0.901	0.7554	0.7596	0.7513	0.7406	0.7545	0.8547	0.8901	0.7986	0.7892	0.768	0.7996	0.8449	0.8381	0.8453	0.877	0.9062	0.8962	0.9029	0.9261	0.9194	0.9514	0.9446	0.9848	0.003678
GO:0001707_mesoderm_formation	0.0003151	0.004494	0.2238	0.5189	0.1393	0.4777	0.5971	0.6461	0.6569	0.3313	0.6531	0.64	0.8433	0.8418	0.9007	0.7702	0.7791	0.7832	0.7556	0.8014	0.8735	0.9025	0.8207	0.7892	0.7746	0.8012	0.8449	0.8454	0.8524	0.8959	0.9163	0.8962	0.9164	0.9286	0.936	0.9514	0.9466	0.9848	0.007911
GO:0001655_urogenital_system_development	4.072e-05	0.0001812	0.4112	0.6008	0.2664	0.1772	0.4686	0.4908	0.6756	0.2626	0.479	0.5212	0.8521	0.7601	0.8165	0.7554	0.7319	0.7336	0.7498	0.7256	0.8547	0.7837	0.8245	0.7892	0.7815	0.8096	0.8629	0.8394	0.8456	0.8808	0.9141	0.9277	0.9164	0.9286	0.8815	0.9514	0.9265	0.9848	3.717e-05
GO:0048762_mesenchymal_cell_differentiation	0.007081	0.00268	0.4734	0.3293	0.3503	0.1772	0.4038	0.5728	0.645	0.4012	0.5306	0.6189	0.6841	0.7472	0.7811	0.7553	0.7168	0.7294	0.747	0.7279	0.8225	0.8192	0.7706	0.7518	0.7659	0.7363	0.8145	0.8144	0.8611	0.8728	0.9062	0.9091	0.9029	0.9286	0.8582	0.9398	0.9465	0.9848	0.000136
GO:0014031_mesenchymal_cell_development	0.007081	0.00268	0.4734	0.3293	0.3503	0.1772	0.4038	0.5728	0.645	0.4012	0.5306	0.6189	0.6841	0.7472	0.7811	0.7553	0.7168	0.7294	0.747	0.7279	0.8225	0.8192	0.7706	0.7518	0.7659	0.7363	0.8145	0.8144	0.8611	0.8728	0.9062	0.9091	0.9029	0.9286	0.8582	0.9398	0.9465	0.9848	0.000136
GO:0060485_mesenchyme_development	0.007075	0.003875	0.5458	0.3795	0.4122	0.2765	0.4978	0.6461	0.688	0.4998	0.6206	0.6458	0.7366	0.7677	0.8165	0.7704	0.7469	0.7606	0.7642	0.7869	0.8486	0.813	0.8001	0.78	0.7808	0.7968	0.8449	0.8381	0.8787	0.9001	0.9122	0.9308	0.9029	0.9298	0.8755	0.9514	0.9466	0.9848	0.0002466
GO:0009888_tissue_development	4.072e-05	6.519e-05	0.6662	0.4516	0.06441	0.2622	0.1658	0.455	0.63	0.467	0.7223	0.6843	0.7372	0.7807	0.7947	0.8011	0.8274	0.8029	0.8392	0.8174	0.9023	0.9025	0.8391	0.7892	0.7854	0.8256	0.8809	0.8783	0.9159	0.9446	0.9374	0.9701	0.9455	0.957	0.949	0.965	0.963	0.9848	3.717e-05
GO:0030030_cell_projection_organization	4.072e-05	6.519e-05	0.5053	0.3268	0.02421	0.2763	0.382	0.7321	0.6219	0.5509	0.7223	0.7141	0.8017	0.8035	0.9014	0.8266	0.8053	0.8081	0.8386	0.8174	0.9023	0.851	0.8503	0.8371	0.8608	0.8909	0.8742	0.8949	0.885	0.9315	0.9374	0.9483	0.9393	0.9545	0.9322	0.9591	0.9524	0.9848	3.717e-05
GO:0050768_negative_regulation_of_neurogenesis	0.007075	0.004621	0.4611	0.1802	0.2785	0.1944	0.1348	0.5823	0.3796	0.3305	0.5181	0.5048	0.4703	0.4132	0.6846	0.719	0.675	0.6818	0.7116	0.5845	0.775	0.7853	0.6378	0.7518	0.6481	0.7224	0.7569	0.7925	0.7432	0.8509	0.8777	0.8962	0.8982	0.9015	0.847	0.9063	0.8594	0.9848	0.00128
GO:0010721_negative_regulation_of_cell_development	0.001932	0.00366	0.4554	0.3027	0.3558	0.318	0.1774	0.5337	0.4032	0.4232	0.6081	0.5723	0.5372	0.4992	0.6581	0.7375	0.7168	0.7154	0.7556	0.6483	0.8086	0.7853	0.6951	0.777	0.7285	0.7968	0.8081	0.8144	0.7562	0.8509	0.9005	0.8962	0.8982	0.9227	0.847	0.9398	0.8646	0.9848	0.001554
GO:0019800_peptide_cross-linking_via_chondroitin_4-sulfate_glycosaminoglycan	0.1701	0.03179	0.5177	0.4162	0.4574	0.2622	0.1597	0.3381	0.3838	0.4981	0.6214	0.6189	0.4628	0.5881	0.5562	0.695	0.723	0.7152	0.7605	0.6483	0.7721	0.772	0.5754	0.6881	0.6703	0.7363	0.7225	0.7707	0.8279	0.8509	0.864	0.9308	0.8982	0.9015	0.847	0.9375	0.8933	0.9848	0.0225
GO:0031290_retinal_ganglion_cell_axon_guidance	0.01699	0.06322	0.4427	0.327	0.2857	0.2227	0.2399	0.386	0.5363	0.6109	0.6682	0.7141	0.4843	0.5156	0.5683	0.7493	0.7383	0.7764	0.7556	0.7172	0.7388	0.7837	0.6252	0.7473	0.6828	0.7016	0.7622	0.8347	0.8611	0.8509	0.8862	0.9457	0.8993	0.9015	0.8362	0.9063	0.9466	0.9848	0.06904
GO:0045686_negative_regulation_of_glial_cell_differentiation	0.04708	0.05191	0.6116	0.4504	0.4574	0.4459	0.2697	0.5002	0.3553	0.4822	0.6304	0.5456	0.5895	0.5433	0.6532	0.7337	0.7412	0.7152	0.7378	0.6931	0.7869	0.7962	0.5811	0.7518	0.719	0.7685	0.8317	0.7925	0.7432	0.8406	0.8868	0.8962	0.8982	0.9166	0.8461	0.9063	0.8594	0.9848	0.00373
GO:0014014_negative_regulation_of_gliogenesis	0.04708	0.05191	0.6116	0.4504	0.4574	0.4459	0.2697	0.5002	0.3553	0.4822	0.6304	0.5456	0.5895	0.5433	0.6532	0.7337	0.7412	0.7152	0.7378	0.6931	0.7869	0.7962	0.5811	0.7518	0.719	0.7685	0.8317	0.7925	0.7432	0.8406	0.8868	0.8962	0.8982	0.9166	0.8461	0.9063	0.8594	0.9848	0.00373
GO:0032879_regulation_of_localization	0.001816	6.519e-05	0.5198	0.1341	0.0837	0.1358	0.1775	0.4798	0.4032	0.4453	0.5523	0.6525	0.6462	0.7065	0.7811	0.5773	0.6875	0.6474	0.7642	0.7172	0.6699	0.7133	0.5748	0.5703	0.7066	0.7147	0.8449	0.7742	0.8453	0.877	0.9062	0.9457	0.8982	0.9286	0.8968	0.9398	0.9067	0.9848	3.717e-05
GO:0051049_regulation_of_transport	0.05416	6.519e-05	0.5905	0.1341	0.12	0.308	0.2687	0.6065	0.577	0.5287	0.6531	0.6945	0.6069	0.7472	0.8405	0.6066	0.73	0.7152	0.7979	0.7545	0.739	0.7853	0.6423	0.5372	0.7134	0.6728	0.8305	0.7742	0.8456	0.905	0.9062	0.9457	0.8982	0.9286	0.8977	0.9398	0.9286	0.9848	3.717e-05
GO:0065008_regulation_of_biological_quality	0.04711	0.0002757	0.7517	0.1639	0.2373	0.3498	0.2774	0.6274	0.5919	0.4323	0.4972	0.6458	0.6127	0.6332	0.7916	0.5498	0.5831	0.5886	0.7116	0.7172	0.7906	0.7865	0.7271	0.6242	0.6828	0.6329	0.8317	0.7547	0.8453	0.8509	0.9005	0.9277	0.8982	0.9166	0.9156	0.9398	0.8863	0.9848	3.717e-05
GO:0031103_axon_regeneration	0.05096	0.0153	0.6762	0.254	0.3985	0.1003	0.2189	0.5951	0.5868	0.5212	0.4974	0.6374	0.5752	0.5484	0.6888	0.7554	0.675	0.7164	0.7378	0.7158	0.7631	0.7133	0.7726	0.7793	0.6703	0.7154	0.7569	0.8027	0.8453	0.8509	0.9005	0.9308	0.9029	0.9009	0.8868	0.9375	0.9446	0.9848	0.004857
GO:0031102_neuron_projection_regeneration	0.02098	0.007313	0.6008	0.3119	0.3832	0.142	0.4006	0.6065	0.4564	0.4354	0.4684	0.5978	0.7015	0.6512	0.7073	0.7554	0.6456	0.7154	0.7378	0.67	0.7721	0.706	0.7975	0.787	0.7285	0.7545	0.7845	0.8144	0.8453	0.8509	0.9005	0.9287	0.9029	0.9015	0.8968	0.9398	0.9446	0.9848	0.001023
GO:0040008_regulation_of_growth	0.06851	0.03084	0.3771	0.2865	0.2938	0.327	0.5071	0.6071	0.5969	0.3627	0.6025	0.6189	0.6508	0.6325	0.7302	0.7493	0.6932	0.7438	0.7642	0.7135	0.648	0.7072	0.7776	0.7793	0.6029	0.6253	0.8449	0.8381	0.8456	0.8509	0.9005	0.9277	0.9058	0.886	0.8755	0.9063	0.9465	0.9848	0.01926
GO:0021700_developmental_maturation	0.001484	0.0307	0.4402	0.1922	0.3759	0.2622	0.4473	0.4908	0.5636	0.4926	0.5418	0.6572	0.5611	0.72	0.7129	0.7493	0.6514	0.7152	0.7642	0.7545	0.8114	0.7888	0.7795	0.7725	0.7337	0.7363	0.7954	0.8135	0.8453	0.8308	0.9005	0.9457	0.9029	0.9222	0.8681	0.9398	0.9446	0.9848	0.001478
GO:0070838_divalent_metal_ion_transport	0.1545	0.02671	0.5536	0.124	0.4341	0.3257	0.04486	0.5296	0.664	0.4489	0.5205	0.6189	0.2484	0.4896	0.6581	0.7127	0.7429	0.7154	0.7293	0.7115	0.8412	0.8127	0.5748	0.7518	0.719	0.7147	0.8117	0.7797	0.8611	0.8541	0.9005	0.9457	0.8982	0.9227	0.8815	0.9514	0.9364	0.9848	0.001023
GO:0006816_calcium_ion_transport	0.2054	0.03449	0.5551	0.1815	0.5082	0.3772	0.04521	0.5168	0.688	0.5212	0.613	0.6525	0.3376	0.5972	0.6733	0.7553	0.7791	0.7582	0.7642	0.7503	0.8621	0.833	0.6423	0.78	0.7659	0.7485	0.8449	0.8144	0.8759	0.8959	0.9062	0.9481	0.9029	0.9286	0.8968	0.9514	0.9465	0.9848	0.0007954
GO:0007610_behavior	0.3263	0.007491	0.3714	0.1256	0.5899	0.2967	0.01494	0.3977	0.63	0.7471	0.7715	0.8325	0.4088	0.5971	0.5921	0.7733	0.8141	0.8081	0.828	0.8069	0.7994	0.8254	0.5811	0.7518	0.7131	0.6207	0.8564	0.8381	0.8786	0.877	0.9005	0.9647	0.9164	0.9286	0.847	0.9398	0.958	0.9848	0.01674
GO:0060042_retina_morphogenesis_in_camera-type_eye	0.2822	0.00864	0.6645	0.2575	0.581	0.5168	0.05241	0.3806	0.5737	0.6735	0.7427	0.7589	0.2574	0.6551	0.6581	0.7037	0.7717	0.7648	0.7979	0.7545	0.8086	0.8127	0.5748	0.7473	0.719	0.7224	0.812	0.8381	0.8786	0.8853	0.9062	0.9481	0.8982	0.9261	0.8567	0.9459	0.9466	0.9848	0.03225
GO:0055065_metal_ion_homeostasis	0.3708	0.003604	0.5802	0.1476	0.353	0.2919	0.2233	0.5257	0.6756	0.5964	0.6841	0.7178	0.5171	0.5659	0.658	0.7037	0.7791	0.7221	0.8181	0.7411	0.7721	0.8307	0.5748	0.6397	0.7398	0.7224	0.8564	0.7893	0.8786	0.877	0.9062	0.9483	0.8982	0.9166	0.847	0.9398	0.8852	0.9848	0.008673
GO:0006875_cellular_metal_ion_homeostasis	0.4085	0.008581	0.6092	0.1752	0.3262	0.327	0.227	0.5248	0.6756	0.6375	0.7358	0.7459	0.5123	0.6164	0.6581	0.7242	0.8045	0.745	0.828	0.7769	0.7947	0.833	0.5811	0.6706	0.7659	0.7363	0.8629	0.8135	0.8787	0.8959	0.9062	0.949	0.8993	0.9227	0.847	0.9398	0.9466	0.9848	0.01899
GO:0055074_calcium_ion_homeostasis	0.364	0.007313	0.5333	0.1608	0.4078	0.2622	0.1524	0.542	0.6782	0.6404	0.7249	0.7543	0.5018	0.6075	0.6569	0.7493	0.8045	0.7606	0.8392	0.7869	0.8068	0.8639	0.6176	0.7085	0.7694	0.7528	0.8617	0.8314	0.896	0.908	0.9062	0.9618	0.9029	0.927	0.8484	0.9514	0.9482	0.9848	0.006209
GO:0006874_cellular_calcium_ion_homeostasis	0.3981	0.01189	0.527	0.1821	0.38	0.2824	0.1464	0.5064	0.6799	0.6561	0.7427	0.7571	0.4945	0.6333	0.6297	0.7493	0.8045	0.7624	0.8392	0.7974	0.8086	0.8688	0.6252	0.7085	0.7694	0.7794	0.8629	0.8381	0.895	0.9102	0.9122	0.962	0.9029	0.927	0.847	0.9514	0.9482	0.9848	0.01332
GO:0007398_ectoderm_development	0.3198	0.007146	0.7341	0.2946	0.5527	0.3101	0.3209	0.4867	0.7203	0.63	0.7249	0.7617	0.5983	0.6551	0.7354	0.7493	0.7791	0.7836	0.8182	0.7869	0.8412	0.8677	0.7628	0.7473	0.7659	0.7224	0.8561	0.8381	0.8918	0.9134	0.9175	0.962	0.9164	0.9298	0.889	0.9514	0.9482	0.9848	0.007792
GO:0051048_negative_regulation_of_secretion	0.4487	0.04789	0.6847	0.3895	0.04409	0.327	0.2163	0.5032	0.6399	0.5831	0.7249	0.7715	0.6426	0.7214	0.7279	0.7513	0.7791	0.7837	0.8237	0.783	0.8412	0.8445	0.7628	0.7473	0.7659	0.7224	0.8564	0.8381	0.8546	0.905	0.9062	0.9457	0.9029	0.9286	0.8868	0.9454	0.9466	0.9848	0.003795
GO:0048878_chemical_homeostasis	0.1186	6.519e-05	0.7517	0.2401	0.1974	0.4459	0.324	0.7127	0.6827	0.5579	0.6531	0.6525	0.5784	0.6488	0.7811	0.6	0.7412	0.6681	0.7998	0.7627	0.8318	0.8694	0.6268	0.579	0.719	0.7224	0.8449	0.7636	0.8787	0.8959	0.9062	0.9481	0.8982	0.9286	0.8968	0.9514	0.9446	0.9848	0.000136
GO:0050801_ion_homeostasis	0.1777	0.001145	0.7755	0.1917	0.3544	0.4509	0.3693	0.709	0.6756	0.5597	0.6541	0.7033	0.5372	0.6263	0.7906	0.7037	0.7717	0.7152	0.8246	0.7974	0.8486	0.8523	0.6502	0.7334	0.7659	0.7713	0.8617	0.7925	0.8787	0.9096	0.9163	0.9483	0.9029	0.9286	0.8968	0.9514	0.9466	0.9848	0.0002298
GO:0055080_cation_homeostasis	0.4217	0.008909	0.7517	0.1927	0.3357	0.566	0.3141	0.6964	0.688	0.6612	0.7427	0.7512	0.5714	0.6463	0.6983	0.6988	0.8045	0.7221	0.8357	0.8085	0.8224	0.8523	0.5811	0.6462	0.7694	0.7903	0.8629	0.8027	0.8787	0.905	0.9163	0.9504	0.9029	0.9286	0.8582	0.9514	0.9466	0.9848	0.01559
GO:0030003_cellular_cation_homeostasis	0.4496	0.02218	0.8079	0.3481	0.362	0.5716	0.387	0.7398	0.6782	0.6584	0.7415	0.7328	0.5958	0.6612	0.7906	0.7037	0.8045	0.725	0.828	0.7974	0.8254	0.8445	0.6266	0.6804	0.7815	0.8096	0.8665	0.8027	0.8759	0.8959	0.9062	0.9483	0.8993	0.9261	0.847	0.9514	0.9466	0.9848	0.04538
GO:0030516_regulation_of_axon_extension	0.0004891	0.08632	0.2433	0.5213	0.5403	0.2919	0.1842	0.298	0.4475	0.5404	0.6541	0.6332	0.4722	0.5188	0.5416	0.7554	0.7429	0.7648	0.793	0.7308	0.744	0.645	0.7237	0.7649	0.719	0.8096	0.7954	0.8381	0.8279	0.8959	0.9005	0.8454	0.9029	0.9222	0.8113	0.9063	0.9174	0.9814	0.03321
GO:0048663_neuron_fate_commitment	0.0001357	0.003812	0.3277	0.4463	0.3985	0.1944	0.05241	0.1746	0.4639	0.4593	0.6531	0.5456	0.4722	0.6262	0.5408	0.7554	0.7752	0.75	0.7979	0.7864	0.8532	0.7853	0.6951	0.7867	0.7694	0.8285	0.8449	0.8381	0.8611	0.908	0.9062	0.9457	0.9029	0.9298	0.847	0.9514	0.9466	0.9848	3.717e-05
GO:0045669_positive_regulation_of_osteoblast_differentiation	0.000287	0.06128	0.4039	0.6099	0.5435	0.3747	0.08982	0.3022	0.4234	0.4078	0.6163	0.6525	0.417	0.6574	0.595	0.7863	0.8024	0.7931	0.7979	0.7295	0.8682	0.833	0.7603	0.7892	0.7845	0.8706	0.8352	0.8428	0.8611	0.908	0.9062	0.9457	0.905	0.9286	0.847	0.9514	0.9466	0.9848	0.0002708
GO:0016481_negative_regulation_of_transcription	4.072e-05	0.05846	0.03045	0.4309	0.4181	0.407	0.08557	0.07136	0.5592	0.303	0.5376	0.6334	0.6442	0.6953	0.5921	0.7779	0.7605	0.7906	0.8392	0.7172	0.8615	0.8334	0.8207	0.8173	0.848	0.9046	0.8904	0.8635	0.8611	0.9096	0.9141	0.9457	0.9164	0.9286	0.8732	0.9514	0.9466	0.9848	3.717e-05
GO:0001764_neuron_migration	0.0092	0.06154	0.2301	0.536	0.38	0.5039	0.1251	0.1296	0.5636	0.5683	0.6531	0.6857	0.5983	0.5972	0.2559	0.7553	0.7319	0.745	0.7979	0.7256	0.8086	0.8127	0.7975	0.7892	0.7694	0.7996	0.8449	0.8394	0.8611	0.8728	0.9062	0.9457	0.9164	0.9227	0.7727	0.9514	0.9466	0.9848	0.004947
GO:0051216_cartilage_development	0.07757	0.009384	0.1708	0.5325	0.3183	0.4893	0.08082	0.1088	0.5868	0.6206	0.7586	0.7404	0.6037	0.5881	0.5781	0.8075	0.8367	0.8439	0.8392	0.7869	0.8757	0.7853	0.8385	0.5755	0.7812	0.8192	0.8617	0.8976	0.9072	0.9315	0.9218	0.9701	0.9367	0.9298	0.8755	0.9591	0.963	0.9848	3.717e-05
GO:0048857_neural_nucleus_development	0.2822	0.1338	0.253	0.305	0.2474	0.3385	0.04838	0.2913	0.6707	0.6184	0.6541	0.7622	0.4498	0.5775	0.5294	0.7493	0.7836	0.8021	0.7979	0.7137	0.8086	0.833	0.6816	0.7892	0.7134	0.7675	0.7954	0.8381	0.8636	0.877	0.9005	0.9457	0.9029	0.9015	0.847	0.9398	0.9482	0.9848	0.01877
GO:0007517_muscle_organ_development	0.007359	0.0009575	0.4672	0.3829	0.2618	0.3381	0.01709	0.09952	0.5969	0.5212	0.6682	0.7203	0.4714	0.6318	0.5921	0.7592	0.8045	0.7906	0.8122	0.8099	0.855	0.8811	0.7685	0.777	0.719	0.7856	0.8629	0.8381	0.9062	0.9047	0.9062	0.9614	0.9165	0.9286	0.8868	0.9514	0.9482	0.9848	3.717e-05
GO:0021587_cerebellum_morphogenesis	0.0517	0.0267	0.106	0.3749	0.5932	0.2004	0.1242	0.09868	0.664	0.6921	0.7352	0.7178	0.4572	0.4474	0.4223	0.7553	0.7812	0.7606	0.8185	0.7604	0.7869	0.7263	0.5748	0.7473	0.7351	0.7786	0.8449	0.8144	0.8611	0.905	0.9062	0.9483	0.9029	0.9286	0.7065	0.9398	0.9466	0.9848	0.008738
GO:0022037_metencephalon_development	0.02581	0.01783	0.3871	0.2946	0.6018	0.08095	0.1251	0.2932	0.6756	0.7049	0.7361	0.765	0.4572	0.5775	0.5926	0.7807	0.8053	0.7931	0.8294	0.8164	0.8412	0.8127	0.6947	0.7793	0.7659	0.7713	0.8449	0.8381	0.8787	0.9247	0.9122	0.962	0.9164	0.9298	0.847	0.9514	0.9489	0.9848	0.001023
GO:0021575_hindbrain_morphogenesis	0.02754	0.0743	0.2132	0.4714	0.6055	0.3245	0.2043	0.2077	0.6799	0.6921	0.7427	0.7353	0.5895	0.6676	0.5562	0.7702	0.8045	0.7837	0.8392	0.8099	0.8402	0.7853	0.7237	0.7789	0.7854	0.8466	0.8629	0.8381	0.8611	0.9247	0.9062	0.9483	0.9029	0.9298	0.8362	0.9514	0.9466	0.9848	0.00373
GO:0006813_potassium_ion_transport	0.0004741	0.0008674	0.4434	0.3603	0.4135	0.1806	0.1953	0.4798	0.4177	0.4582	0.6197	0.6189	0.6995	0.6332	0.7429	0.7553	0.7984	0.7931	0.7979	0.7172	0.8486	0.7837	0.7308	0.7892	0.7694	0.8173	0.8449	0.8454	0.8611	0.8959	0.9062	0.9457	0.9165	0.9298	0.8927	0.9514	0.9485	0.9848	3.717e-05
GO:0060541_respiratory_system_development	0.004215	0.0002757	0.4662	0.3883	0.4135	0.2622	0.1644	0.4556	0.5246	0.396	0.5585	0.6223	0.6238	0.6676	0.6581	0.7493	0.7168	0.745	0.7908	0.7256	0.8225	0.7853	0.7573	0.7778	0.7845	0.8192	0.8561	0.8144	0.8611	0.8959	0.9062	0.9457	0.9029	0.9286	0.8755	0.9514	0.9466	0.9848	3.717e-05
GO:0030323_respiratory_tube_development	0.0148	0.003604	0.342	0.4162	0.4574	0.2605	0.1426	0.4027	0.5636	0.4545	0.6163	0.64	0.6393	0.643	0.5802	0.7702	0.7412	0.7606	0.7979	0.7305	0.8225	0.7853	0.7706	0.7882	0.7845	0.8192	0.8629	0.8381	0.8611	0.901	0.9062	0.9457	0.9164	0.9286	0.847	0.9514	0.9466	0.9848	3.717e-05
GO:0030324_lung_development	0.01929	0.001794	0.5212	0.4358	0.4809	0.2936	0.2375	0.5199	0.5919	0.4698	0.6206	0.6492	0.6833	0.72	0.6581	0.7733	0.7443	0.7673	0.802	0.7545	0.8486	0.8083	0.7961	0.7892	0.8121	0.8285	0.8629	0.8381	0.8611	0.908	0.9122	0.9457	0.9164	0.9286	0.8755	0.9514	0.9466	0.9848	3.717e-05
GO:0046885_regulation_of_hormone_biosynthetic_process	0.0504	0.04025	0.4554	0.4749	0.5413	0.3973	0.1251	0.4798	0.6047	0.5212	0.6531	0.7167	0.4889	0.6607	0.5921	0.7554	0.7836	0.7837	0.8122	0.7538	0.8412	0.8127	0.7389	0.7892	0.7876	0.8192	0.8617	0.8381	0.8447	0.9008	0.9125	0.9457	0.9029	0.9298	0.8755	0.9514	0.9466	0.9848	0.002592
GO:0031054_pre-microRNA_processing	0.07649	0.01793	0.4876	0.314	0.5719	0.4295	0.1919	0.3801	0.5969	0.5698	0.7004	0.6624	0.5874	0.6441	0.693	0.7619	0.8045	0.7778	0.828	0.7864	0.8412	0.8049	0.7654	0.7892	0.7845	0.8256	0.8449	0.8381	0.8611	0.9077	0.9062	0.9457	0.9029	0.9286	0.8724	0.9514	0.9461	0.9848	0.07961
GO:0009880_embryonic_pattern_specification	0.1047	0.04398	0.1801	0.3304	0.4925	0.238	0.3992	0.3619	0.3819	0.5698	0.5671	0.7086	0.6873	0.6441	0.5683	0.7604	0.7429	0.7931	0.8181	0.67	0.7202	0.7865	0.78	0.7892	0.7694	0.8285	0.8617	0.8381	0.8456	0.8509	0.9005	0.9457	0.9029	0.9227	0.847	0.9398	0.9466	0.9848	7.362e-05
GO:0022604_regulation_of_cell_morphogenesis	4.072e-05	0.04132	0.2673	0.1847	0.4914	0.4986	0.353	0.4963	0.5051	0.5723	0.6255	0.7178	0.6648	0.6449	0.8249	0.8011	0.7943	0.8021	0.8392	0.7869	0.8547	0.8448	0.8136	0.8157	0.8219	0.8654	0.8629	0.8635	0.8456	0.9292	0.9163	0.9457	0.9196	0.9298	0.8977	0.9514	0.9489	0.9848	0.0001685
GO:0031346_positive_regulation_of_cell_projection_organization	0.0004741	0.1287	0.3543	0.2994	0.1919	0.4295	0.2292	0.6206	0.6219	0.5964	0.6252	0.6805	0.4935	0.4066	0.8367	0.8025	0.8045	0.8029	0.8251	0.7869	0.8086	0.7853	0.7869	0.7892	0.7694	0.8466	0.8617	0.8422	0.8456	0.9292	0.9062	0.9457	0.9164	0.9286	0.847	0.9514	0.9466	0.9848	0.01262
GO:0030500_regulation_of_bone_mineralization	0.0135	0.2941	0.1347	0.4124	0.4821	0.527	0.1251	0.3463	0.4293	0.4162	0.6177	0.6458	0.2897	0.5737	0.5683	0.7554	0.7766	0.7675	0.8182	0.7256	0.8225	0.8139	0.7634	0.7892	0.7659	0.8096	0.8449	0.8394	0.8724	0.8853	0.9062	0.9457	0.9029	0.9286	0.8113	0.9514	0.9466	0.9848	0.002179
GO:0070167_regulation_of_biomineral_formation	0.02962	0.3482	0.2006	0.4459	0.4909	0.6023	0.1401	0.3948	0.5636	0.514	0.6711	0.6857	0.3431	0.6607	0.5944	0.7807	0.8045	0.7906	0.8392	0.7824	0.8526	0.851	0.7948	0.7892	0.7815	0.8256	0.8564	0.848	0.8845	0.9096	0.9163	0.9481	0.9164	0.9298	0.8048	0.9514	0.9466	0.9848	0.001535
GO:0045778_positive_regulation_of_ossification	0.02113	0.393	0.3789	0.3749	0.4924	0.5729	0.1953	0.4872	0.4139	0.4582	0.6163	0.6458	0.3063	0.739	0.7105	0.7553	0.7691	0.7606	0.8105	0.7172	0.8224	0.8313	0.7573	0.7793	0.7815	0.8285	0.8317	0.8394	0.8471	0.9001	0.9062	0.9457	0.9029	0.927	0.847	0.9514	0.9465	0.9848	0.008442
GO:0070169_positive_regulation_of_biomineral_formation	0.002494	0.4772	0.3543	0.4908	0.5413	0.6348	0.2774	0.4785	0.5433	0.4998	0.6541	0.64	0.4722	0.7288	0.6581	0.7702	0.7836	0.7832	0.8182	0.7545	0.8486	0.8415	0.7795	0.7892	0.7876	0.8514	0.8564	0.8413	0.8611	0.9096	0.9062	0.9457	0.9029	0.9286	0.847	0.9514	0.9465	0.9848	0.01361
GO:0030501_positive_regulation_of_bone_mineralization	0.002494	0.4772	0.3543	0.4908	0.5413	0.6348	0.2774	0.4785	0.5433	0.4998	0.6541	0.64	0.4722	0.7288	0.6581	0.7702	0.7836	0.7832	0.8182	0.7545	0.8486	0.8415	0.7795	0.7892	0.7876	0.8514	0.8564	0.8413	0.8611	0.9096	0.9062	0.9457	0.9029	0.9286	0.847	0.9514	0.9465	0.9848	0.01361
GO:0048732_gland_development	0.04564	0.0267	0.09906	0.3999	0.1265	0.4893	0.1311	0.3247	0.7314	0.5903	0.7249	0.7178	0.6623	0.6473	0.3919	0.7733	0.8045	0.8029	0.8392	0.7869	0.8547	0.8002	0.7795	0.7892	0.7815	0.8285	0.8629	0.8635	0.8873	0.9209	0.9215	0.9481	0.9165	0.9298	0.847	0.9514	0.9533	0.9848	0.0002708
GO:0042127_regulation_of_cell_proliferation	0.006825	6.519e-05	0.3478	0.4156	0.004284	0.3012	0.0646	0.1873	0.5881	0.6435	0.7649	0.7178	0.6393	0.7214	0.4503	0.8027	0.8215	0.821	0.8526	0.8174	0.8621	0.8811	0.7986	0.7892	0.7815	0.8852	0.8844	0.8765	0.8787	0.9446	0.9343	0.9574	0.9233	0.9511	0.8724	0.9523	0.963	0.9848	3.717e-05
GO:0045597_positive_regulation_of_cell_differentiation	0.000287	0.01635	0.253	0.5597	0.02519	0.5063	0.08557	0.1165	0.66	0.5811	0.7586	0.7141	0.6722	0.6842	0.5921	0.8393	0.8338	0.8138	0.8557	0.8164	0.881	0.8415	0.8549	0.8415	0.8682	0.9086	0.9159	0.8783	0.8985	0.9446	0.9343	0.9677	0.9367	0.957	0.8755	0.9591	0.957	0.9848	3.717e-05
GO:0035108_limb_morphogenesis	4.072e-05	0.0001245	0.4312	0.4769	0.2881	0.4625	0.1251	0.2057	0.688	0.5326	0.6531	0.7111	0.7006	0.6612	0.5595	0.8015	0.8226	0.7969	0.8392	0.8164	0.8726	0.8785	0.815	0.822	0.8382	0.8851	0.8629	0.8673	0.8986	0.9315	0.9343	0.9607	0.9329	0.9503	0.8875	0.9591	0.9505	0.9848	3.717e-05
GO:0035107_appendage_morphogenesis	4.072e-05	0.0001245	0.4312	0.4769	0.2881	0.4625	0.1251	0.2057	0.688	0.5326	0.6531	0.7111	0.7006	0.6612	0.5595	0.8015	0.8226	0.7969	0.8392	0.8164	0.8726	0.8785	0.815	0.822	0.8382	0.8851	0.8629	0.8673	0.8986	0.9315	0.9343	0.9607	0.9329	0.9503	0.8875	0.9591	0.9505	0.9848	3.717e-05
GO:0060173_limb_development	4.072e-05	0.0001245	0.4502	0.5044	0.1549	0.4724	0.1527	0.3148	0.6782	0.5404	0.6531	0.7178	0.7159	0.6473	0.5683	0.8027	0.8226	0.7969	0.8392	0.8085	0.8621	0.8811	0.8207	0.8332	0.8171	0.8818	0.8629	0.875	0.9062	0.9315	0.9337	0.9647	0.9361	0.9418	0.8902	0.9591	0.9542	0.9848	3.717e-05
GO:0048736_appendage_development	4.072e-05	0.0001245	0.4502	0.5044	0.1549	0.4724	0.1527	0.3148	0.6782	0.5404	0.6531	0.7178	0.7159	0.6473	0.5683	0.8027	0.8226	0.7969	0.8392	0.8085	0.8621	0.8811	0.8207	0.8332	0.8171	0.8818	0.8629	0.875	0.9062	0.9315	0.9337	0.9647	0.9361	0.9418	0.8902	0.9591	0.9542	0.9848	3.717e-05
GO:0035113_embryonic_appendage_morphogenesis	4.072e-05	0.00366	0.5157	0.4426	0.05953	0.5637	0.2136	0.2955	0.7457	0.5444	0.6531	0.7167	0.7336	0.7318	0.5921	0.8015	0.8141	0.7931	0.8392	0.8174	0.8774	0.8694	0.8207	0.8246	0.8599	0.8909	0.8749	0.8635	0.9062	0.9315	0.9343	0.9504	0.93	0.9503	0.8968	0.9591	0.9489	0.9848	3.717e-05
GO:0030326_embryonic_limb_morphogenesis	4.072e-05	0.00366	0.5157	0.4426	0.05953	0.5637	0.2136	0.2955	0.7457	0.5444	0.6531	0.7167	0.7336	0.7318	0.5921	0.8015	0.8141	0.7931	0.8392	0.8174	0.8774	0.8694	0.8207	0.8246	0.8599	0.8909	0.8749	0.8635	0.9062	0.9315	0.9343	0.9504	0.93	0.9503	0.8968	0.9591	0.9489	0.9848	3.717e-05
GO:0051046_regulation_of_secretion	0.2805	0.006544	0.6116	0.4493	0.2749	0.5637	0.1919	0.3692	0.4925	0.5944	0.7215	0.7033	0.6791	0.7572	0.4555	0.7493	0.7791	0.7703	0.7979	0.7869	0.8225	0.8127	0.7776	0.7045	0.7243	0.7224	0.8352	0.8192	0.8456	0.9096	0.9062	0.9457	0.9029	0.9261	0.8868	0.9398	0.9466	0.9848	0.0008253
GO:0030199_collagen_fibril_organization	0.1766	0.01396	0.6387	0.4548	0.2197	0.5556	0.163	0.3148	0.7065	0.6109	0.7715	0.7067	0.7002	0.7489	0.5921	0.8015	0.8226	0.8081	0.8392	0.8174	0.8757	0.8776	0.8136	0.8	0.7876	0.8161	0.8704	0.8635	0.8787	0.9247	0.9163	0.9483	0.9181	0.9298	0.8755	0.9514	0.9529	0.9848	0.02106
GO:0019226_transmission_of_nerve_impulse	0.2807	0.01638	0.5521	0.4587	0.2207	0.7162	0.2509	0.4324	0.6672	0.718	0.8172	0.8119	0.6963	0.7578	0.4547	0.829	0.8578	0.8473	0.8697	0.8404	0.9023	0.8874	0.8503	0.6242	0.8516	0.8767	0.9181	0.8949	0.9062	0.9452	0.9374	0.9701	0.9367	0.9503	0.9001	0.9591	0.9582	0.9848	0.001023
GO:0042471_ear_morphogenesis	0.001412	0.003472	0.1708	0.5215	0.2102	0.6714	0.2421	0.3352	0.7557	0.734	0.8172	0.7656	0.6873	0.7346	0.5781	0.795	0.8367	0.8113	0.8551	0.8611	0.8547	0.833	0.7991	0.808	0.8171	0.8765	0.9159	0.8681	0.8787	0.9315	0.9343	0.9504	0.9165	0.9382	0.8755	0.9514	0.9482	0.9848	0.001023
GO:0042472_inner_ear_morphogenesis	0.004489	0.01747	0.2369	0.536	0.38	0.6747	0.3059	0.385	0.7517	0.7153	0.8068	0.7599	0.7124	0.7495	0.5988	0.7921	0.8287	0.8029	0.8508	0.8616	0.8547	0.833	0.815	0.8041	0.8373	0.8756	0.9078	0.8635	0.8787	0.9315	0.9343	0.9504	0.9165	0.9382	0.8768	0.9514	0.9482	0.9848	0.001759
GO:0043583_ear_development	0.0001357	0.00407	0.2462	0.5444	0.06111	0.6721	0.361	0.2742	0.7453	0.718	0.8172	0.773	0.7533	0.8016	0.5921	0.8238	0.8532	0.8439	0.8723	0.8725	0.8774	0.8811	0.8448	0.8432	0.8663	0.9045	0.9333	0.8984	0.8877	0.9446	0.9374	0.9647	0.9393	0.9605	0.8968	0.9591	0.958	0.9848	0.0002466
GO:0048839_inner_ear_development	0.001444	0.009499	0.3569	0.5643	0.2346	0.6868	0.4235	0.3209	0.7097	0.6976	0.805	0.7571	0.7518	0.8035	0.658	0.8075	0.8384	0.8081	0.8551	0.8725	0.8774	0.8665	0.8448	0.835	0.8696	0.8928	0.923	0.8856	0.8787	0.9402	0.9374	0.9504	0.9386	0.9586	0.9008	0.9591	0.9489	0.9848	0.001023
GO:0009953_dorsal/ventral_pattern_formation	0.01117	0.007302	0.3274	0.5605	0.5436	0.5862	0.1704	0.3912	0.7672	0.6584	0.7788	0.7178	0.6623	0.7677	0.6344	0.7807	0.8065	0.7906	0.8392	0.8213	0.8615	0.8895	0.7991	0.7892	0.8483	0.8852	0.8844	0.8395	0.9062	0.9331	0.9261	0.9607	0.9164	0.9298	0.8755	0.9514	0.9489	0.9848	0.0001685
GO:0000122_negative_regulation_of_transcription_from_RNA_polymerase_II_promoter	4.072e-05	0.123	0.2522	0.6821	0.4924	0.6175	0.1903	0.3463	0.7182	0.5509	0.7223	0.7033	0.7518	0.782	0.6581	0.8011	0.8053	0.8103	0.8557	0.8099	0.8774	0.8979	0.8413	0.8399	0.8911	0.9191	0.9226	0.8867	0.8786	0.9345	0.9261	0.9483	0.9165	0.9419	0.8755	0.9589	0.9482	0.9848	3.717e-05
GO:0045892_negative_regulation_of_transcription,_DNA-dependent	4.072e-05	0.08749	0.2814	0.6179	0.3991	0.6023	0.1895	0.1961	0.7453	0.5444	0.7361	0.7543	0.7641	0.792	0.6914	0.8075	0.8324	0.845	0.8721	0.8174	0.9023	0.9004	0.8741	0.8613	0.8906	0.9191	0.9361	0.9079	0.9062	0.9446	0.9374	0.9607	0.9367	0.9508	0.8968	0.9591	0.958	0.9848	3.717e-05
GO:0051253_negative_regulation_of_RNA_metabolic_process	4.072e-05	0.1344	0.2866	0.6381	0.4413	0.6416	0.2424	0.2742	0.7485	0.567	0.7427	0.7543	0.7923	0.8001	0.7354	0.8075	0.8327	0.8446	0.8721	0.8254	0.9023	0.9004	0.8786	0.8634	0.8939	0.9197	0.9369	0.9079	0.9062	0.9446	0.9374	0.9607	0.9367	0.9511	0.8968	0.9591	0.958	0.9848	3.717e-05
GO:0006140_regulation_of_nucleotide_metabolic_process	0.4797	0.01396	0.588	0.455	0.6829	0.2153	0.1704	0.298	0.6213	0.6921	0.7582	0.7543	0.6623	0.7528	0.4656	0.7744	0.8081	0.8081	0.8392	0.8056	0.8532	0.9004	0.7978	0.4911	0.7848	0.8285	0.8449	0.8635	0.8787	0.9209	0.9163	0.9481	0.9164	0.9298	0.847	0.9514	0.9529	0.9848	0.004518
GO:0030808_regulation_of_nucleotide_biosynthetic_process	0.5363	0.02582	0.5751	0.4566	0.6909	0.2246	0.1584	0.3148	0.6672	0.7276	0.7821	0.7743	0.6623	0.7495	0.4715	0.7839	0.8273	0.834	0.8392	0.8164	0.8615	0.9025	0.8072	0.4307	0.7943	0.8466	0.8561	0.8635	0.8918	0.9292	0.9252	0.9483	0.9164	0.9298	0.847	0.9514	0.958	0.9848	0.006209
GO:0030802_regulation_of_cyclic_nucleotide_biosynthetic_process	0.5363	0.02582	0.5751	0.4566	0.6909	0.2246	0.1584	0.3148	0.6672	0.7276	0.7821	0.7743	0.6623	0.7495	0.4715	0.7839	0.8273	0.834	0.8392	0.8164	0.8615	0.9025	0.8072	0.4307	0.7943	0.8466	0.8561	0.8635	0.8918	0.9292	0.9252	0.9483	0.9164	0.9298	0.847	0.9514	0.958	0.9848	0.006209
GO:0030799_regulation_of_cyclic_nucleotide_metabolic_process	0.5016	0.01664	0.6274	0.4845	0.7151	0.2622	0.1991	0.3463	0.659	0.718	0.7821	0.769	0.6812	0.7764	0.5405	0.7921	0.8257	0.8329	0.84	0.8164	0.8615	0.9025	0.8136	0.4307	0.8147	0.8552	0.8617	0.8635	0.8877	0.9293	0.927	0.9483	0.9164	0.9338	0.847	0.9514	0.958	0.9848	0.002706
GO:0019935_cyclic-nucleotide-mediated_signaling	0.6605	0.0308	0.4308	0.4872	0.7314	0.3264	0.1359	0.1983	0.6756	0.7899	0.8307	0.8514	0.5905	0.7472	0.3847	0.8075	0.8707	0.8778	0.8721	0.8616	0.8733	0.9112	0.8126	0.6242	0.7746	0.8285	0.8749	0.8961	0.9234	0.9446	0.9343	0.9704	0.9361	0.9511	0.847	0.9514	0.9736	0.9848	0.03844
GO:0007187_G-protein_signaling,_coupled_to_cyclic_nucleotide_second_messenger	0.6681	0.0287	0.5536	0.5094	0.7144	0.3218	0.2136	0.2932	0.688	0.7842	0.8172	0.849	0.6648	0.7484	0.5562	0.8075	0.8579	0.8662	0.8541	0.8616	0.8683	0.9068	0.8136	0.5342	0.7659	0.8165	0.8629	0.8791	0.9159	0.9446	0.9343	0.9679	0.9291	0.9445	0.847	0.9514	0.9729	0.9848	0.1058
GO:0014048_regulation_of_glutamate_secretion	0.2027	0.05877	0.06928	0.4317	0.02049	0.4067	0.04164	0.1144	0.5969	0.6639	0.742	0.7471	0.455	0.6286	0.1545	0.7513	0.8045	0.7837	0.8181	0.7869	0.8224	0.8093	0.5748	0.7334	0.7659	0.8096	0.8449	0.8027	0.8611	0.908	0.9062	0.9457	0.9029	0.9285	0.7727	0.9398	0.9466	0.9848	0.004518
GO:0007267_cell-cell_signaling	0.1939	6.519e-05	0.1164	0.17	0.0145	0.4891	0.0146	0.1428	0.693	0.763	0.8435	0.8595	0.6032	0.72	0.3229	0.8494	0.8865	0.8676	0.8835	0.8725	0.9089	0.9004	0.8207	0.5527	0.8648	0.8851	0.9333	0.8984	0.9256	0.9519	0.939	0.986	0.9505	0.9605	0.9229	0.9628	0.9736	0.9848	3.717e-05
GO:0009605_response_to_external_stimulus	0.6264	0.1221	0.07282	0.09043	0.3937	0.2619	0.00397	0.04677	0.7515	0.8373	0.8637	0.8744	0.364	0.4746	0.06655	0.8075	0.8707	0.862	0.8721	0.863	0.8682	0.5704	0.7664	0.7892	0.7694	0.8096	0.8665	0.8783	0.9204	0.9315	0.9163	0.9849	0.9291	0.9298	0.8399	0.9514	0.9736	0.9848	0.006249
GO:0007154_cell_communication	0.5524	0.001831	0.02568	0.1802	0.03942	0.1772	0.00397	0.01159	0.7751	0.8831	0.9167	0.9017	0.5895	0.4671	0.212	0.8967	0.9206	0.91	0.9226	0.9113	0.9126	0.9312	0.8207	0.8753	0.8516	0.9191	0.9381	0.9423	0.9534	0.9722	0.9618	0.986	0.9686	0.9767	0.8399	0.9628	0.9736	0.9848	0.0002004
GO:0007165_signal_transduction	0.6078	0.004494	0.03911	0.2724	0.2278	0.1931	0.004194	0.01147	0.7991	0.8831	0.9167	0.9017	0.5717	0.4859	0.2042	0.896	0.9206	0.91	0.9226	0.9146	0.9097	0.9307	0.8207	0.8747	0.8511	0.9183	0.9369	0.9423	0.9534	0.9722	0.9598	0.986	0.9686	0.9767	0.8113	0.9628	0.9736	0.9848	0.001328
GO:0007166_cell_surface_receptor_linked_signaling_pathway	0.7941	0.28	0.001547	0.4162	0.1216	0.2622	0.000798	0.001584	0.7828	0.8831	0.9167	0.9017	0.5597	0.379	0.004634	0.8967	0.9206	0.91	0.9226	0.9179	0.9185	0.303	0.8481	0.8916	0.8682	0.9191	0.9497	0.9423	0.9534	0.9722	0.9598	0.986	0.9686	0.9767	0.3362	0.9591	0.9736	0.9848	0.0003643
GO:0031057_negative_regulation_of_histone_modification	0.6131	0.7081	0.09708	0.4459	0.5869	0.5305	0.04239	0.08875	0.6799	0.724	0.7821	0.792	0.3365	0.4896	0.1225	0.7553	0.8149	0.7841	0.8392	0.7974	0.7631	0.5185	0.5756	0.7745	0.7659	0.7968	0.8629	0.8381	0.8851	0.8629	0.9062	0.9027	0.9029	0.9286	0.585	0.9375	0.9482	0.9763	0.2654
GO:0009582_detection_of_abiotic_stimulus	0.6612	0.255	0.253	0.0854	0.6986	0.3654	0.02279	0.2831	0.7997	0.7638	0.797	0.8394	0.2773	0.6536	0.3704	0.7807	0.8045	0.8029	0.8228	0.8174	0.8366	0.8127	0.7552	0.7867	0.7373	0.7224	0.8449	0.8381	0.8963	0.8959	0.9062	0.9647	0.905	0.9222	0.7791	0.9383	0.9466	0.9848	0.3547
GO:0050906_detection_of_stimulus_involved_in_sensory_perception	0.7175	0.4144	0.1102	0.3159	0.7512	0.5556	0.04838	0.255	0.8426	0.7941	0.8264	0.839	0.5123	0.7214	0.2559	0.7744	0.8045	0.8081	0.8392	0.8404	0.8486	0.6724	0.766	0.7793	0.7694	0.7968	0.8564	0.8381	0.9072	0.9152	0.9062	0.962	0.905	0.9286	0.7439	0.9398	0.9466	0.9848	0.5131
GO:0006955_immune_response	0.6898	0.6446	0.6116	0.4156	0.6693	0.3239	0.02216	0.417	0.6675	0.8831	0.702	0.7094	0.3682	0.6252	0.003292	0.7879	0.8009	0.7226	0.6409	0.8435	0.4601	0.02323	0.5756	0.7725	0.8172	0.8286	0.9005	0.8235	0.9328	0.9096	0.8676	0.771	0.7518	0.8664	0.8398	0.9036	0.8593	0.7489	0.3486
GO:0050776_regulation_of_immune_response	0.71	0.6943	0.4232	0.5325	0.6199	0.591	0.1991	0.3977	0.7751	0.7814	0.6955	0.7088	0.6549	0.4596	0.1236	0.6993	0.8707	0.5072	0.6168	0.6581	0.7514	0.01443	0.7975	0.7904	0.821	0.7488	0.9228	0.5882	0.8985	0.7672	0.8861	0.836	0.8332	0.9076	0.7439	0.8116	0.8239	0.8021	0.00592
GO:0045087_innate_immune_response	0.7819	0.6697	0.5409	0.5804	0.6843	0.6868	0.4533	0.4864	0.7018	0.8667	0.8828	0.8526	0.6648	0.7496	0.01235	0.6528	0.8152	0.5142	0.8666	0.8381	0.8414	0.575	0.7706	0.7917	0.8538	0.8051	0.9005	0.7798	0.9062	0.845	0.7982	0.9027	0.8789	0.7448	0.847	0.9514	0.9489	0.9708	0.6833
GO:0050877_neurological_system_process	0.7941	0.8215	0.02241	0.6904	0.4403	0.5054	0.2178	0.03811	0.9119	0.7727	0.9167	0.9017	0.8714	0.8804	0.0139	0.8967	0.9206	0.91	0.8514	0.8435	0.92	0.02098	0.935	0.9181	0.9457	0.9547	0.9588	0.9423	0.9534	0.9722	0.9687	0.938	0.9686	0.9767	0.8755	0.9755	0.9736	0.9848	0.007286
GO:0007186_G-protein_coupled_receptor_protein_signaling_pathway	0.7941	0.8215	0.0728	0.8384	0.6517	0.3879	0.2706	0.1296	0.9119	0.7733	0.8173	0.9017	0.802	0.8741	0.008722	0.8967	0.9206	0.7765	0.8364	0.8435	0.894	0.02358	0.935	0.9181	0.9457	0.9532	0.9588	0.9423	0.9534	0.9722	0.9687	0.8861	0.9686	0.9767	0.847	0.9755	0.9736	0.9848	0.003795
GO:0050896_response_to_stimulus	0.7941	0.8215	0.3642	0.5856	0.6713	0.3239	0.1739	0.3013	0.901	0.7963	0.9006	0.8145	0.7535	0.7577	0.212	0.8967	0.9206	0.91	0.6834	0.8435	0.9392	0.03481	0.9033	0.9014	0.9093	0.9255	0.956	0.9423	0.9534	0.9722	0.9598	0.986	0.9686	0.9767	0.8755	0.9751	0.9736	0.9848	0.1828
GO:0003008_system_process	0.7941	0.8215	0.1567	0.7085	0.2749	0.8948	0.1551	0.102	0.9119	0.8831	0.9167	0.9017	0.9047	0.9031	0.03853	0.8967	0.9206	0.91	0.9226	0.9322	0.9557	0.3835	0.935	0.9181	0.9457	0.9547	0.9588	0.9423	0.9534	0.9722	0.9687	0.986	0.9686	0.9767	0.9156	0.9755	0.9736	0.9848	0.003526
GO:0006417_regulation_of_translation	0.04032	0.6673	0.3729	0.5297	0.4811	0.2411	0.8036	0.8558	0.7453	0.5404	0.5821	0.5481	0.7934	0.8309	0.8999	0.7493	0.5712	0.7221	0.6131	0.7815	0.7565	0.7368	0.8072	0.7793	0.719	0.7452	0.8145	0.7797	0.8447	0.8095	0.8309	0.6618	0.4104	0.8604	0.4674	0.4848	0.1442	0.4876	0.5497
GO:0015031_protein_transport	0.03599	0.4165	0.4122	0.6168	0.7778	0.1658	0.5421	0.7059	0.772	0.7939	0.3778	0.8145	0.8507	0.4769	0.9203	0.7609	0.5344	0.6206	0.8255	0.8767	0.7514	0.7806	0.6946	0.6719	0.5844	0.6338	0.7128	0.4506	0.8716	0.7186	0.7897	0.4647	0.6161	0.8844	0.5358	0.1367	0.2839	0.737	0.5723
GO:0045184_establishment_of_protein_localization	0.04538	0.4376	0.451	0.6381	0.8076	0.1538	0.5935	0.7059	0.772	0.8033	0.4632	0.8306	0.8453	0.4808	0.9161	0.7654	0.5486	0.6385	0.8392	0.8857	0.7514	0.8038	0.7416	0.765	0.6135	0.6854	0.7146	0.4768	0.9113	0.7294	0.7967	0.5232	0.6392	0.9133	0.5506	0.1615	0.3033	0.769	0.5826
GO:0033036_macromolecule_localization	0.009515	0.4955	0.2292	0.3924	0.7889	0.2583	0.5051	0.7059	0.7899	0.7702	0.4626	0.8267	0.9314	0.5309	0.9161	0.8075	0.6195	0.6552	0.8499	0.8707	0.7514	0.9146	0.8662	0.765	0.5911	0.6564	0.7146	0.5418	0.8982	0.7696	0.7405	0.5232	0.6392	0.8807	0.53	0.1524	0.1568	0.7639	0.6277
GO:0008104_protein_localization	0.0248	0.5546	0.2852	0.4338	0.797	0.3822	0.6317	0.7182	0.8347	0.7759	0.6603	0.842	0.9314	0.6837	0.9236	0.8034	0.7313	0.7019	0.8552	0.8725	0.7826	0.9507	0.8662	0.8072	0.6682	0.7488	0.7656	0.5844	0.9083	0.7887	0.9079	0.5741	0.7146	0.8467	0.6225	0.2521	0.2735	0.8849	0.6047
GO:0043412_macromolecule_modification	4.072e-05	0.7879	0.0001893	0.2221	0.6824	0.8073	0.8911	0.8976	0.791	0.5675	0.2134	0.6805	0.9321	0.9279	0.9267	0.8075	0.7791	0.7906	0.8046	0.8354	0.9126	0.9004	0.9052	0.8582	0.9097	0.9191	0.9233	0.8635	0.8611	0.9096	0.93	0.5232	0.905	0.8863	0.6237	0.01613	0.07694	0.402	0.4508
GO:0006464_protein_modification_process	4.072e-05	0.7829	0.0001893	0.2299	0.6558	0.7473	0.8911	0.8976	0.7457	0.5388	0.3504	0.6374	0.9321	0.925	0.9267	0.7988	0.7429	0.7832	0.793	0.8164	0.9023	0.8895	0.9033	0.8449	0.9057	0.9171	0.9078	0.848	0.8524	0.8997	0.9215	0.6327	0.9029	0.8843	0.699	0.03246	0.1568	0.4589	0.3607
GO:0006996_organelle_organization	0.0001357	0.6948	0.1987	0.4258	0.6848	0.8549	0.8604	0.8976	0.8033	0.6887	0.6346	0.7577	0.8829	0.8617	0.08024	0.8025	0.7836	0.7931	0.8246	0.8269	0.8885	0.9081	0.8786	0.8371	0.8753	0.8968	0.9092	0.8635	0.8611	0.9096	0.9261	0.4045	0.7237	0.9298	0.7315	0.221	0.3168	0.419	0.4644
GO:0043632_modification-dependent_macromolecule_catabolic_process	0.002187	0.8215	0.1907	0.6168	0.7354	0.7136	0.6317	0.8976	0.7847	0.7067	0.7919	0.7178	0.5339	0.5414	0.8454	0.6818	0.8065	0.7837	0.8392	0.8462	0.6118	0.9025	0.8786	0.7936	0.8937	0.847	0.9078	0.8381	0.8605	0.8447	0.6358	0.6327	0.9029	0.9298	0.303	0.3475	0.7734	0.8443	0.7582
GO:0019941_modification-dependent_protein_catabolic_process	0.002187	0.8215	0.1907	0.6168	0.7354	0.7136	0.6317	0.8976	0.7847	0.7067	0.7919	0.7178	0.5339	0.5414	0.8454	0.6818	0.8065	0.7837	0.8392	0.8462	0.6118	0.9025	0.8786	0.7936	0.8937	0.847	0.9078	0.8381	0.8605	0.8447	0.6358	0.6327	0.9029	0.9298	0.303	0.3475	0.7734	0.8443	0.7582
GO:0051603_proteolysis_involved_in_cellular_protein_catabolic_process	0.002486	0.8215	0.2452	0.6389	0.7455	0.6896	0.6317	0.8976	0.7899	0.7276	0.797	0.7416	0.5339	0.5508	0.8299	0.7768	0.8226	0.7906	0.8392	0.864	0.6428	0.907	0.8865	0.8098	0.8939	0.8697	0.9159	0.8422	0.8605	0.8457	0.6348	0.6327	0.9029	0.919	0.2913	0.3319	0.7447	0.8269	0.7582
GO:0044257_cellular_protein_catabolic_process	0.002477	0.8215	0.258	0.6397	0.7546	0.742	0.6558	0.8976	0.7995	0.7427	0.8169	0.7543	0.6118	0.6109	0.8557	0.7364	0.8287	0.7931	0.8392	0.87	0.6697	0.9106	0.8957	0.8173	0.9043	0.8711	0.9226	0.85	0.8605	0.8457	0.6338	0.6618	0.9164	0.919	0.2988	0.361	0.7533	0.8443	0.7582
GO:0045454_cell_redox_homeostasis	0.01117	0.6791	0.4679	0.3369	0.6821	0.4293	0.8729	0.7776	0.7161	0.7249	0.7658	0.7373	0.747	0.6082	0.9031	0.756	0.7791	0.745	0.828	0.8099	0.8225	0.7853	0.8195	0.6502	0.844	0.8828	0.8704	0.8381	0.8279	0.803	0.7462	0.5713	0.8982	0.4852	0.7308	0.5032	0.7118	0.8812	0.5485
GO:0046907_intracellular_transport	0.0002614	0.7943	0.449	0.6727	0.7555	0.4024	0.8774	0.8388	0.8538	0.763	0.781	0.8314	0.9314	0.7592	0.9091	0.7167	0.8194	0.6381	0.8392	0.8793	0.7421	0.7102	0.8442	0.8404	0.541	0.9045	0.8593	0.7568	0.9083	0.8283	0.7517	0.7471	0.8088	0.7717	0.782	0.2788	0.156	0.769	0.6047
GO:0044419_interspecies_interaction_between_organisms	0.004196	0.8215	0.4558	0.7148	0.8218	0.7916	0.8911	0.8976	0.8596	0.3467	0.5845	0.839	0.9321	0.9279	0.9095	0.7214	0.8707	0.5973	0.7673	0.9022	0.9249	0.8037	0.8831	0.8056	0.8321	0.8539	0.9367	0.5725	0.9159	0.7618	0.9374	0.6198	0.9291	0.6013	0.6933	0.4848	0.5492	0.9793	0.6656
GO:0016192_vesicle-mediated_transport	4.072e-05	0.2941	0.3168	0.6396	0.5991	0.7916	0.823	0.8641	0.836	0.548	0.7008	0.7033	0.872	0.9002	0.9074	0.7553	0.7727	0.7164	0.8182	0.8174	0.9023	0.9004	0.8448	0.5397	0.8682	0.8852	0.8629	0.8314	0.8851	0.9096	0.9122	0.8919	0.9029	0.9286	0.8231	0.3949	0.07694	0.6982	0.02471
GO:0016044_cellular_membrane_organization	0.003562	0.1902	0.4778	0.6834	0.6821	0.7363	0.7301	0.8731	0.8852	0.6921	0.7574	0.7167	0.903	0.8894	0.8158	0.7702	0.7792	0.7906	0.828	0.8511	0.9023	0.9025	0.8134	0.7892	0.8857	0.8901	0.8878	0.8422	0.9062	0.9292	0.9261	0.9457	0.9029	0.9391	0.5358	0.3151	0.1192	0.5812	0.09264
GO:0043687_post-translational_protein_modification	4.072e-05	0.6432	0.0001893	0.3358	0.6375	0.7183	0.8911	0.8976	0.7453	0.5404	0.7223	0.6525	0.9321	0.922	0.9267	0.8027	0.7469	0.7848	0.7979	0.8174	0.9023	0.8811	0.9037	0.8522	0.9043	0.9156	0.9217	0.8635	0.8611	0.905	0.9261	0.8962	0.9164	0.9298	0.9317	0.1467	0.7353	0.7832	0.2312
GO:0007264_small_GTPase_mediated_signal_transduction	4.072e-05	0.1118	0.002395	0.02013	0.6431	0.7354	0.8911	0.8976	0.8287	0.6921	0.7787	0.8123	0.9314	0.9182	0.9267	0.8249	0.8053	0.7931	0.8392	0.8743	0.9097	0.9231	0.9033	0.6578	0.8939	0.8937	0.9333	0.85	0.8787	0.9293	0.9374	0.9457	0.9165	0.9444	0.7638	0.7271	0.3033	0.9848	0.001296
GO:0008219_cell_death	0.000426	0.1786	0.1603	0.2033	0.767	0.6453	0.8715	0.8976	0.8866	0.7475	0.8637	0.8048	0.9314	0.9279	0.867	0.8649	0.8667	0.8656	0.8647	0.914	0.9483	0.9429	0.8734	0.893	0.9097	0.7281	0.9369	0.9126	0.9159	0.946	0.948	0.9483	0.9397	0.919	0.9587	0.738	0.4725	0.9814	0.1145
GO:0016265_death	0.000287	0.1591	0.1719	0.193	0.771	0.672	0.8636	0.8976	0.8903	0.7475	0.8637	0.8123	0.9314	0.9279	0.867	0.8649	0.8707	0.8662	0.8697	0.914	0.9484	0.9467	0.8979	0.8944	0.9097	0.7483	0.9369	0.9152	0.9159	0.9482	0.9508	0.9504	0.9412	0.9499	0.9587	0.7662	0.4725	0.9848	0.1494
GO:0060627_regulation_of_vesicle-mediated_transport	0.3046	0.02389	0.5943	0.3327	0.093	0.5323	0.7282	0.8369	0.63	0.5326	0.4747	0.6838	0.6623	0.2844	0.9074	0.6284	0.5494	0.5886	0.7378	0.7007	0.6925	0.7759	0.7389	0.579	0.7321	0.7229	0.7744	0.6749	0.4949	0.8095	0.8895	0.8962	0.8316	0.826	0.9156	0.7074	0.8505	0.9286	0.1783
GO:0050766_positive_regulation_of_phagocytosis	0.65	0.08741	0.6662	0.4889	0.04894	0.6282	0.4686	0.6065	0.7729	0.7407	0.6951	0.8191	0.5895	0.7065	0.6581	0.7068	0.7168	0.7222	0.793	0.7974	0.7721	0.8192	0.7473	0.6872	0.7081	0.6563	0.806	0.7919	0.8598	0.7965	0.8969	0.9457	0.8982	0.8988	0.8732	0.9063	0.913	0.9848	0.3253
GO:0008361_regulation_of_cell_size	0.2864	0.01042	0.4112	0.3707	0.2469	0.4475	0.6316	0.7022	0.7211	0.4765	0.6214	0.6189	0.7002	0.739	0.7959	0.7179	0.689	0.7221	0.7201	0.7437	0.7994	0.8127	0.7978	0.7892	0.6851	0.7224	0.8564	0.8381	0.8456	0.8095	0.9005	0.8962	0.9029	0.8988	0.8773	0.9398	0.9063	0.9848	0.05759
GO:0035282_segmentation	0.02522	0.007352	0.5536	0.4504	0.02061	0.4507	0.5663	0.5993	0.675	0.5444	0.6476	0.7033	0.7459	0.7322	0.7906	0.7554	0.7791	0.7837	0.7979	0.7256	0.8486	0.8847	0.7795	0.7789	0.7659	0.8454	0.8229	0.8381	0.8759	0.877	0.9062	0.9457	0.9029	0.9261	0.8868	0.9514	0.9446	0.9848	0.0002466
GO:0048730_epidermis_morphogenesis	0.2068	0.07248	0.5478	0.5766	0.02344	0.4986	0.5164	0.6509	0.8031	0.5964	0.7223	0.7111	0.8535	0.8237	0.8692	0.7687	0.7412	0.7606	0.8182	0.8174	0.8748	0.8313	0.8245	0.7892	0.8382	0.8654	0.8629	0.8395	0.885	0.9152	0.9215	0.9457	0.9164	0.9298	0.9206	0.9523	0.9466	0.9848	0.01518
GO:0043488_regulation_of_mRNA_stability	0.04122	0.7051	0.3261	0.2613	0.5306	0.6849	0.5187	0.5663	0.7619	0.5444	0.6187	0.6332	0.6127	0.6225	0.6606	0.7036	0.6618	0.7154	0.7498	0.7221	0.7779	0.8326	0.6002	0.7334	0.7131	0.7269	0.8317	0.7707	0.8456	0.8301	0.8895	0.8962	0.8108	0.9052	0.8399	0.7289	0.8505	0.9339	0.2853
GO:0048634_regulation_of_muscle_organ_development	0.0299	0.4152	0.3827	0.5325	0.484	0.3973	0.4938	0.5728	0.2863	0.4024	0.6081	0.5456	0.6734	0.7281	0.7537	0.7068	0.6875	0.745	0.7745	0.67	0.7492	0.7837	0.7723	0.78	0.7694	0.8096	0.8507	0.8381	0.8279	0.8509	0.9005	0.8962	0.8982	0.9052	0.8399	0.8948	0.9067	0.9848	0.03954
GO:0016202_regulation_of_striated_muscle_tissue_development	0.04122	0.4402	0.3943	0.5769	0.5306	0.505	0.55	0.5823	0.3315	0.4342	0.6297	0.5499	0.7081	0.75	0.7354	0.7337	0.71	0.759	0.7979	0.7137	0.7869	0.8118	0.7912	0.7889	0.7845	0.8285	0.8617	0.8407	0.8294	0.8697	0.9062	0.8962	0.8982	0.9227	0.847	0.9063	0.9286	0.9848	0.05744
GO:0048641_regulation_of_skeletal_muscle_tissue_development	0.02493	0.5689	0.2312	0.6554	0.4652	0.4032	0.5756	0.6433	0.4554	0.4736	0.613	0.5488	0.7443	0.7214	0.7916	0.7379	0.6807	0.745	0.7754	0.702	0.7721	0.7837	0.7628	0.7867	0.7641	0.8096	0.8145	0.8381	0.8279	0.8521	0.9005	0.8962	0.8982	0.9222	0.847	0.7074	0.911	0.9848	0.2137
GO:0032012_regulation_of_ARF_protein_signal_transduction	4.072e-05	0.002191	0.07454	0.2221	0.3395	0.3752	0.4686	0.7339	0.7828	0.5029	0.5181	0.6525	0.7459	0.8741	0.8075	0.7628	0.7168	0.7397	0.6324	0.7917	0.8486	0.8834	0.7776	0.7821	0.7134	0.7224	0.7681	0.8027	0.8705	0.8728	0.9062	0.9457	0.9029	0.9261	0.9202	0.738	0.8594	0.9848	0.003625
GO:0035265_organ_growth	0.004975	0.05326	0.1463	0.1202	0.4954	0.327	0.6173	0.7546	0.7361	0.5029	0.6163	0.6189	0.7975	0.7495	0.8783	0.7068	0.675	0.7154	0.7378	0.6879	0.8203	0.8207	0.7706	0.7725	0.7416	0.7968	0.8053	0.7893	0.8456	0.8509	0.9005	0.8962	0.8982	0.9166	0.8755	0.9375	0.9067	0.9848	0.02867
GO:0043524_negative_regulation_of_neuron_apoptosis	0.002604	0.1064	0.2302	0.1202	0.4785	0.5637	0.6528	0.6065	0.7314	0.4856	0.613	0.621	0.8793	0.7717	0.8374	0.7733	0.7483	0.759	0.8182	0.775	0.8547	0.8445	0.8397	0.7892	0.8473	0.878	0.8849	0.8381	0.8456	0.928	0.9163	0.8962	0.905	0.9298	0.9142	0.9314	0.9446	0.9848	0.001554
GO:0010720_positive_regulation_of_cell_development	4.072e-05	0.0674	0.0698	0.1246	0.09489	0.5248	0.5356	0.5951	0.6345	0.4713	0.6163	0.6472	0.7443	0.7601	0.8581	0.8015	0.7812	0.7906	0.8386	0.7869	0.8547	0.8313	0.8448	0.8098	0.8516	0.8852	0.8849	0.8454	0.8453	0.9315	0.9163	0.9287	0.9164	0.9298	0.9221	0.9514	0.9446	0.9848	0.006686
GO:0050769_positive_regulation_of_neurogenesis	4.072e-05	0.1195	0.1278	0.1485	0.1779	0.591	0.5572	0.6478	0.6933	0.5454	0.6682	0.7111	0.7465	0.7511	0.8714	0.8027	0.8045	0.7931	0.8392	0.8164	0.8615	0.833	0.8413	0.7936	0.8516	0.8852	0.8849	0.8406	0.8611	0.9327	0.9163	0.9457	0.9165	0.9348	0.9258	0.9514	0.9466	0.9848	0.02844
GO:0051056_regulation_of_small_GTPase_mediated_signal_transduction	4.072e-05	0.0185	0.001676	0.04718	0.5172	0.5171	0.5617	0.6999	0.7485	0.5831	0.6393	0.6845	0.8025	0.8596	0.7544	0.7733	0.723	0.7675	0.7642	0.8099	0.8486	0.9004	0.8063	0.808	0.7815	0.8466	0.8507	0.8381	0.8611	0.8509	0.9062	0.9277	0.9029	0.9286	0.8868	0.9514	0.733	0.9848	0.01835
GO:0046578_regulation_of_Ras_protein_signal_transduction	4.072e-05	0.03095	0.001369	0.1246	0.4088	0.5652	0.7264	0.816	0.7729	0.6047	0.6531	0.7111	0.8588	0.8685	0.8411	0.795	0.7469	0.7906	0.7643	0.8164	0.8615	0.9064	0.8136	0.815	0.7854	0.856	0.8449	0.8381	0.8705	0.877	0.9062	0.9277	0.9029	0.9298	0.9018	0.9514	0.7459	0.9848	0.03484
GO:0010646_regulation_of_cell_communication	4.072e-05	6.519e-05	0.03991	0.03343	0.215	0.5556	0.4686	0.706	0.7252	0.5622	0.7223	0.7111	0.863	0.8791	0.7614	0.8015	0.7749	0.7969	0.8108	0.8699	0.9023	0.8948	0.8786	0.8357	0.8382	0.8554	0.8849	0.8791	0.885	0.9315	0.9374	0.9481	0.9291	0.9504	0.949	0.9591	0.9482	0.9848	3.717e-05
GO:0009966_regulation_of_signal_transduction	4.072e-05	0.001271	0.01355	0.02013	0.4181	0.7116	0.655	0.7626	0.7889	0.6109	0.7654	0.7086	0.8965	0.9031	0.8398	0.8075	0.7999	0.7981	0.8264	0.8885	0.9035	0.9025	0.8868	0.8487	0.8663	0.8852	0.9159	0.8865	0.8916	0.9339	0.9374	0.9457	0.9278	0.957	0.949	0.9628	0.9466	0.9848	3.717e-05
GO:0014070_response_to_organic_cyclic_substance	0.001997	0.2134	0.1011	0.2942	0.5435	0.6697	0.5045	0.5659	0.6756	0.4765	0.5585	0.6873	0.7469	0.7537	0.7995	0.7699	0.6409	0.725	0.7378	0.7311	0.8378	0.7853	0.8245	0.7882	0.7921	0.7426	0.8629	0.8027	0.8447	0.8509	0.9005	0.8894	0.9029	0.9227	0.9197	0.8718	0.911	0.9848	0.1146
GO:0051348_negative_regulation_of_transferase_activity	0.03195	0.3582	0.1482	0.3885	0.5413	0.7595	0.6149	0.6218	0.7665	0.5212	0.6531	0.5886	0.7443	0.7472	0.8025	0.7281	0.6455	0.7152	0.7556	0.7919	0.7932	0.8445	0.7961	0.777	0.7694	0.8103	0.8742	0.8381	0.8279	0.8509	0.9005	0.8737	0.8982	0.9166	0.8681	0.9398	0.8594	0.9848	0.08466
GO:0048742_regulation_of_skeletal_muscle_fiber_development	0.002371	0.2524	0.1892	0.3718	0.484	0.4459	0.5628	0.6461	0.5531	0.5029	0.6531	0.5855	0.7345	0.7472	0.8422	0.7554	0.7168	0.7675	0.8105	0.7322	0.8203	0.8127	0.7975	0.7892	0.7815	0.8454	0.8449	0.85	0.8453	0.8959	0.9062	0.9245	0.9029	0.9286	0.8629	0.738	0.8751	0.9848	0.04046
GO:0042981_regulation_of_apoptosis	0.00121	0.2294	0.2522	0.3379	0.4088	0.5637	0.6257	0.6911	0.646	0.5326	0.7251	0.6525	0.7641	0.6706	0.9031	0.7609	0.7739	0.7837	0.7979	0.7974	0.8251	0.8811	0.7573	0.7892	0.7418	0.8096	0.8449	0.8422	0.8724	0.9172	0.9062	0.9457	0.9029	0.9286	0.8755	0.7074	0.8424	0.9848	0.008429
GO:0043067_regulation_of_programmed_cell_death	0.0009422	0.2372	0.2522	0.3268	0.4581	0.566	0.634	0.7115	0.6648	0.5404	0.7427	0.659	0.7736	0.6953	0.9074	0.7704	0.7791	0.7906	0.8122	0.8069	0.8379	0.8915	0.7726	0.7917	0.7659	0.8192	0.8564	0.8454	0.8786	0.9247	0.9163	0.9457	0.905	0.9298	0.8868	0.7033	0.8859	0.9848	0.006209
GO:0010941_regulation_of_cell_death	0.0007968	0.2372	0.2731	0.3312	0.4884	0.5729	0.645	0.709	0.675	0.5444	0.7562	0.6799	0.7876	0.7003	0.9074	0.7733	0.7915	0.7906	0.8182	0.8099	0.8412	0.8997	0.7795	0.8041	0.7659	0.8261	0.8617	0.85	0.8787	0.9292	0.9163	0.9457	0.9164	0.9298	0.8868	0.738	0.9165	0.9848	0.00753
GO:0008366_axon_ensheathment	0.009625	0.06471	0.1774	0.1037	0.5712	0.6272	0.7541	0.8184	0.4533	0.5404	0.7249	0.6354	0.7546	0.7495	0.8894	0.7866	0.7791	0.7513	0.8185	0.7545	0.8615	0.8127	0.8398	0.8098	0.821	0.8466	0.8629	0.8422	0.8379	0.905	0.9062	0.9233	0.9029	0.9286	0.9156	0.9514	0.9008	0.9848	0.1145
GO:0007272_ensheathment_of_neurons	0.009625	0.06471	0.1774	0.1037	0.5712	0.6272	0.7541	0.8184	0.4533	0.5404	0.7249	0.6354	0.7546	0.7495	0.8894	0.7866	0.7791	0.7513	0.8185	0.7545	0.8615	0.8127	0.8398	0.8098	0.821	0.8466	0.8629	0.8422	0.8379	0.905	0.9062	0.9233	0.9029	0.9286	0.9156	0.9514	0.9008	0.9848	0.1145
GO:0042552_myelination	0.009302	0.06511	0.2814	0.1827	0.601	0.6313	0.7942	0.8567	0.5737	0.6003	0.7586	0.6682	0.8106	0.7764	0.9014	0.8015	0.8045	0.7848	0.8392	0.7974	0.8757	0.8448	0.8549	0.8257	0.848	0.8713	0.8849	0.8635	0.8611	0.922	0.9143	0.9457	0.9164	0.9298	0.9355	0.9514	0.9446	0.9848	0.115
GO:0031329_regulation_of_cellular_catabolic_process	0.01057	0.04741	0.1185	0.3268	0.5241	0.704	0.7725	0.8976	0.7097	0.6109	0.7361	0.6525	0.8706	0.8741	0.9267	0.7553	0.7469	0.745	0.776	0.8426	0.8733	0.8639	0.825	0.7892	0.7925	0.8256	0.8629	0.8381	0.8611	0.9138	0.9163	0.8962	0.9164	0.9286	0.9492	0.9514	0.9446	0.9848	0.1481
GO:0045661_regulation_of_myoblast_differentiation	0.02528	0.296	0.4651	0.2568	0.5546	0.566	0.7508	0.8492	0.5734	0.566	0.6766	0.6189	0.797	0.8035	0.8781	0.795	0.7429	0.7606	0.8181	0.8099	0.8547	0.8192	0.8207	0.7892	0.794	0.8575	0.8617	0.8433	0.8453	0.9152	0.9062	0.9277	0.905	0.9286	0.8968	0.9514	0.9352	0.9848	0.1686
GO:0001889_liver_development	0.00209	0.3716	0.3117	0.2033	0.5609	0.8263	0.7103	0.8	0.7549	0.4582	0.6206	0.7178	0.7868	0.8507	0.8571	0.7771	0.723	0.7513	0.7979	0.8174	0.8757	0.8445	0.8423	0.8	0.8483	0.8738	0.8629	0.8381	0.8611	0.9096	0.9062	0.8962	0.9164	0.9247	0.9156	0.9514	0.9165	0.9848	0.06624
GO:0007010_cytoskeleton_organization	0.00121	0.2895	0.3734	0.3684	0.5735	0.7438	0.6571	0.8572	0.7715	0.6047	0.7361	0.6789	0.8232	0.8317	0.7896	0.795	0.7812	0.7931	0.793	0.832	0.8774	0.9004	0.8416	0.6242	0.8171	0.8435	0.8629	0.8406	0.8611	0.9063	0.9163	0.9457	0.9165	0.9286	0.9345	0.9514	0.814	0.9848	0.03222
GO:0045773_positive_regulation_of_axon_extension	0.001255	0.2226	0.3286	0.3603	0.5319	0.5915	0.65	0.7771	0.7161	0.628	0.7821	0.7141	0.7759	0.7677	0.8391	0.8075	0.8065	0.8029	0.8392	0.8174	0.8726	0.8246	0.8649	0.8038	0.8473	0.8852	0.8849	0.8635	0.8611	0.9315	0.9163	0.9457	0.9165	0.9298	0.9194	0.9514	0.9471	0.9848	0.1304
GO:0032870_cellular_response_to_hormone_stimulus	0.0001357	0.2761	0.2914	0.4268	0.5909	0.6348	0.6738	0.7847	0.7751	0.6431	0.7537	0.7898	0.8349	0.8323	0.9055	0.8075	0.8053	0.8081	0.8392	0.8265	0.894	0.9085	0.8779	0.8288	0.8663	0.8852	0.8742	0.8813	0.8914	0.9152	0.9343	0.9457	0.9193	0.9298	0.911	0.9589	0.9482	0.9848	0.1287
GO:0010001_glial_cell_differentiation	0.04122	0.1781	0.2617	0.2837	0.5609	0.1316	0.6932	0.8641	0.5969	0.6745	0.6682	0.7459	0.8209	0.7677	0.9261	0.8015	0.7976	0.8029	0.8185	0.7869	0.8615	0.8083	0.8238	0.8256	0.8382	0.8552	0.8629	0.8635	0.8611	0.9138	0.9165	0.9457	0.9164	0.9298	0.8968	0.9514	0.9466	0.9848	0.04312
GO:0042063_gliogenesis	0.02816	0.2318	0.3286	0.3103	0.659	0.2437	0.6846	0.8482	0.6756	0.7325	0.7427	0.7658	0.8535	0.8082	0.9238	0.8266	0.8188	0.8439	0.8392	0.8174	0.881	0.8313	0.8549	0.8522	0.8663	0.8851	0.8989	0.8903	0.8831	0.9315	0.9343	0.9483	0.9278	0.9511	0.9142	0.9514	0.9489	0.9848	0.03102
GO:0030509_BMP_signaling_pathway	0.0006734	0.04025	0.4039	0.6008	0.4598	0.3752	0.2528	0.2932	0.646	0.5454	0.7215	0.6682	0.7021	0.6931	0.78	0.7807	0.8045	0.7906	0.7979	0.7869	0.8682	0.8559	0.78	0.7892	0.7659	0.7968	0.8617	0.8406	0.8787	0.9247	0.9062	0.9457	0.9165	0.9286	0.8755	0.9514	0.9482	0.9848	0.002447
GO:0035313_wound_healing,_spreading_of_epidermal_cells	0.04453	0.1602	0.4362	0.6075	0.5435	0.4724	0.4686	0.486	0.6756	0.5915	0.7589	0.6805	0.7373	0.739	0.7326	0.7733	0.8025	0.7906	0.8181	0.8085	0.8548	0.8334	0.8072	0.7892	0.7815	0.8324	0.8629	0.8454	0.8611	0.8274	0.9062	0.9457	0.9029	0.9286	0.8582	0.9019	0.8499	0.9848	0.0369
GO:0045667_regulation_of_osteoblast_differentiation	0.0002614	0.1055	0.4561	0.6236	0.4649	0.5168	0.3858	0.5064	0.431	0.3328	0.5802	0.64	0.6898	0.7683	0.7844	0.8075	0.8045	0.7931	0.8181	0.7869	0.9023	0.8811	0.8238	0.8191	0.8483	0.8952	0.8629	0.8657	0.8611	0.928	0.9163	0.9457	0.9164	0.9298	0.8964	0.953	0.9466	0.9848	0.000136
GO:0043066_negative_regulation_of_apoptosis	0.0248	0.1632	0.6011	0.5444	0.1458	0.566	0.3406	0.5392	0.659	0.5404	0.7223	0.6458	0.7016	0.6463	0.8154	0.7554	0.7596	0.7684	0.7979	0.8056	0.8225	0.8688	0.7229	0.7789	0.746	0.8103	0.8341	0.8407	0.8611	0.9315	0.9062	0.9457	0.9029	0.9298	0.847	0.9514	0.9466	0.9848	0.006367
GO:0043069_negative_regulation_of_programmed_cell_death	0.02057	0.1795	0.5908	0.5528	0.1915	0.566	0.361	0.5663	0.6679	0.5444	0.7249	0.6525	0.7159	0.6536	0.8308	0.7592	0.7605	0.7742	0.8148	0.8099	0.8283	0.8785	0.7391	0.7793	0.7659	0.8199	0.8449	0.8422	0.8611	0.9315	0.9062	0.9457	0.9029	0.9298	0.8681	0.9514	0.9466	0.9848	0.004746
GO:0060548_negative_regulation_of_cell_death	0.0189	0.1994	0.6038	0.5707	0.215	0.5855	0.387	0.5663	0.6756	0.5683	0.7427	0.659	0.7345	0.6607	0.8405	0.7704	0.7791	0.7848	0.8198	0.8164	0.8412	0.8811	0.7628	0.7867	0.7659	0.8285	0.8449	0.8469	0.8724	0.9315	0.9163	0.9457	0.9164	0.9298	0.8724	0.9514	0.9466	0.9848	0.006007
GO:0035270_endocrine_system_development	0.1377	0.002738	0.5198	0.546	0.2619	0.5635	0.3419	0.6131	0.7492	0.5347	0.7051	0.6374	0.7366	0.7303	0.7544	0.795	0.7791	0.7931	0.7943	0.81	0.8805	0.8326	0.8126	0.7892	0.7743	0.8256	0.8317	0.8407	0.8787	0.9137	0.9062	0.9457	0.9165	0.9286	0.8968	0.9514	0.9482	0.9848	0.000136
GO:0051094_positive_regulation_of_developmental_process	0.001412	0.1337	0.374	0.4427	0.215	0.527	0.3167	0.498	0.5919	0.5404	0.7215	0.7178	0.7197	0.6512	0.7857	0.8015	0.8081	0.7969	0.8392	0.7856	0.8547	0.8853	0.8163	0.8378	0.8161	0.8852	0.8629	0.8635	0.8786	0.9315	0.9163	0.9483	0.9164	0.9298	0.8773	0.953	0.9466	0.9848	3.717e-05
GO:0050772_positive_regulation_of_axonogenesis	0.0004017	0.1041	0.4876	0.4054	0.3367	0.3385	0.4111	0.5867	0.6756	0.6442	0.7257	0.7543	0.6873	0.6998	0.8164	0.8034	0.8211	0.8149	0.8392	0.8073	0.8486	0.8254	0.8391	0.7917	0.8382	0.8846	0.8629	0.8522	0.8787	0.9345	0.9122	0.9483	0.9165	0.9298	0.9156	0.9514	0.9489	0.9848	0.003761
GO:0007492_endoderm_development	0.001859	0.04801	0.6402	0.5743	0.614	0.1944	0.1953	0.5002	0.4959	0.6755	0.7427	0.6873	0.6541	0.7166	0.8007	0.8075	0.8053	0.8029	0.8392	0.8069	0.8526	0.8534	0.8207	0.8249	0.7935	0.8661	0.8707	0.8623	0.8724	0.9315	0.9122	0.9457	0.9165	0.9298	0.8868	0.9514	0.9489	0.9848	0.01727
GO:0030902_hindbrain_development	0.04514	0.01635	0.5198	0.4427	0.5099	0.2765	0.1704	0.3977	0.8	0.724	0.7821	0.8191	0.6734	0.7322	0.6532	0.8015	0.8287	0.8029	0.8392	0.8655	0.8726	0.833	0.8136	0.7892	0.8483	0.8615	0.8849	0.8635	0.9083	0.9315	0.9343	0.9647	0.9278	0.9298	0.9142	0.9514	0.9568	0.9848	3.717e-05
GO:0050679_positive_regulation_of_epithelial_cell_proliferation	0.01117	0.02218	0.6095	0.5094	0.6236	0.5635	0.2163	0.3463	0.5636	0.6272	0.794	0.7178	0.6734	0.7214	0.6581	0.8011	0.8111	0.8029	0.8392	0.8104	0.8412	0.8326	0.8207	0.8157	0.8133	0.8401	0.8629	0.875	0.8786	0.9152	0.9149	0.9483	0.9164	0.9298	0.8724	0.9514	0.9482	0.9848	0.008673
GO:0030001_metal_ion_transport	0.146	0.007453	0.6116	0.5094	0.4924	0.599	0.1566	0.4848	0.675	0.6639	0.797	0.7555	0.7289	0.7578	0.6581	0.8102	0.8716	0.862	0.8644	0.8404	0.9112	0.9004	0.8207	0.5755	0.8663	0.8952	0.9158	0.9069	0.9256	0.9477	0.9374	0.975	0.9449	0.9605	0.936	0.9591	0.9736	0.9848	3.717e-05
GO:0048664_neuron_fate_determination	0.04297	0.3145	0.5333	0.6967	0.6312	0.5637	0.5227	0.2665	0.66	0.6568	0.7358	0.7178	0.7459	0.7495	0.5562	0.7972	0.8045	0.8021	0.8392	0.8164	0.8615	0.8093	0.7978	0.808	0.8399	0.881	0.8849	0.8635	0.8746	0.9138	0.9202	0.9457	0.9164	0.9298	0.847	0.9514	0.9482	0.9848	0.008442
GO:0048754_branching_morphogenesis_of_a_tube	0.0004741	0.002487	0.6771	0.6008	0.4701	0.4159	0.5024	0.5416	0.7161	0.6848	0.7856	0.7178	0.7657	0.7722	0.4547	0.7988	0.823	0.8029	0.8392	0.8174	0.8782	0.8445	0.7975	0.7904	0.8236	0.8714	0.8901	0.8567	0.8877	0.9331	0.9374	0.9504	0.9165	0.9511	0.8815	0.9523	0.9482	0.9848	0.0002298
GO:0001763_morphogenesis_of_a_branching_structure	4.072e-05	0.002224	0.7034	0.6412	0.5489	0.414	0.4993	0.5823	0.6983	0.6901	0.794	0.7167	0.7916	0.8001	0.4547	0.8075	0.8354	0.8081	0.8392	0.8174	0.8896	0.8694	0.815	0.8167	0.8473	0.8846	0.9127	0.8635	0.885	0.9374	0.9374	0.9574	0.9278	0.9586	0.9008	0.9589	0.9489	0.9848	3.717e-05
GO:0046668_regulation_of_retinal_cell_programmed_cell_death	0.02084	0.2357	0.5461	0.3268	0.5435	0.4893	0.382	0.509	0.7358	0.5404	0.5695	0.621	0.7412	0.7484	0.6581	0.7702	0.7153	0.745	0.7498	0.7381	0.8412	0.833	0.8238	0.787	0.7732	0.7968	0.7984	0.8381	0.8611	0.8808	0.9005	0.9393	0.9029	0.9261	0.8868	0.9398	0.9446	0.9848	0.02201
GO:0045930_negative_regulation_of_mitotic_cell_cycle	0.007637	0.3401	0.3832	0.2412	0.5413	0.7018	0.4533	0.6304	0.6533	0.5664	0.6906	0.6844	0.5895	0.6536	0.7412	0.7702	0.7469	0.7915	0.8181	0.7172	0.7691	0.8326	0.7718	0.7904	0.7694	0.8466	0.8629	0.85	0.8453	0.8808	0.9062	0.9457	0.9029	0.9261	0.7519	0.9375	0.9165	0.9848	0.1844
GO:0001508_regulation_of_action_potential	0.04325	0.0217	0.4679	0.1798	0.6121	0.6937	0.4871	0.6065	0.5815	0.5698	0.7641	0.6857	0.6734	0.7003	0.7468	0.7988	0.8045	0.7848	0.8386	0.7917	0.8726	0.8127	0.815	0.7679	0.8133	0.8285	0.8629	0.8517	0.8611	0.9137	0.9062	0.9457	0.9164	0.9298	0.8868	0.9514	0.9466	0.9848	0.06323
GO:0030534_adult_behavior	0.1718	0.04674	0.4903	0.1203	0.6284	0.6714	0.387	0.6942	0.6307	0.6404	0.7361	0.7178	0.7159	0.8035	0.7811	0.769	0.8045	0.7837	0.8181	0.8174	0.8611	0.8445	0.7795	0.7725	0.7876	0.8192	0.8629	0.8144	0.8456	0.9096	0.9062	0.9457	0.9029	0.9286	0.8977	0.9514	0.9446	0.9848	0.002995
GO:0048678_response_to_axon_injury	0.02952	0.1988	0.5659	0.2368	0.6517	0.5174	0.4468	0.6538	0.7078	0.6725	0.7249	0.7543	0.7289	0.7578	0.6589	0.795	0.8053	0.7906	0.8392	0.8164	0.8441	0.8127	0.8207	0.8041	0.8382	0.8618	0.8629	0.8422	0.8611	0.928	0.9163	0.9481	0.9164	0.9298	0.9156	0.9514	0.9482	0.9848	0.01199
GO:0048864_stem_cell_development	0.06361	0.0002364	0.4554	0.4162	0.5306	0.4784	0.1832	0.4731	0.5868	0.5082	0.6053	0.5606	0.6127	0.7214	0.8011	0.7702	0.7469	0.7606	0.7979	0.7769	0.8528	0.8983	0.7634	0.787	0.7694	0.8106	0.8629	0.8266	0.8456	0.9001	0.9062	0.9457	0.9164	0.9298	0.9156	0.9514	0.9446	0.9848	0.0002004
GO:0019827_stem_cell_maintenance	0.1287	0.001102	0.5372	0.4889	0.5979	0.566	0.2488	0.5046	0.659	0.5717	0.6541	0.6332	0.6873	0.7495	0.8253	0.7824	0.7836	0.7906	0.8246	0.8099	0.8682	0.9015	0.8047	0.7892	0.7876	0.8466	0.8665	0.8381	0.8611	0.9152	0.9163	0.9457	0.9164	0.9298	0.9221	0.9514	0.9446	0.9848	0.000492
GO:0015674_di-,_tri-valent_inorganic_cation_transport	0.2909	0.02114	0.6718	0.4222	0.5295	0.599	0.2136	0.6636	0.6756	0.4583	0.613	0.6189	0.5784	0.718	0.7844	0.7493	0.7836	0.745	0.7642	0.7565	0.8757	0.8313	0.7628	0.7807	0.7694	0.7968	0.8341	0.8158	0.8611	0.8959	0.9062	0.9457	0.9029	0.9286	0.9156	0.9514	0.9446	0.9848	0.004746
GO:0001702_gastrulation_with_mouth_forming_second	0.002853	0.05312	0.5515	0.6406	0.5306	0.566	0.502	0.4975	0.688	0.4765	0.6163	0.5681	0.7641	0.8035	0.8749	0.7781	0.7717	0.7589	0.793	0.7848	0.8547	0.8445	0.8207	0.8133	0.825	0.8852	0.8849	0.8381	0.8611	0.8993	0.9062	0.8962	0.9162	0.9286	0.8968	0.9514	0.9446	0.9848	0.0007555
GO:0030111_regulation_of_Wnt_receptor_signaling_pathway	0.06507	0.02218	0.6826	0.5689	0.5399	0.5635	0.5045	0.6964	0.6115	0.4686	0.6531	0.6189	0.765	0.7495	0.8999	0.795	0.7429	0.7437	0.7774	0.8174	0.8615	0.833	0.8207	0.7892	0.8161	0.8756	0.8629	0.8381	0.8456	0.9185	0.9062	0.8962	0.9029	0.9286	0.9117	0.9514	0.9046	0.9848	0.001516
GO:0051385_response_to_mineralocorticoid_stimulus	0.02374	0.06382	0.5717	0.4768	0.5548	0.4756	0.3898	0.6492	0.6756	0.5723	0.6682	0.8038	0.7345	0.7528	0.6888	0.7771	0.7727	0.7931	0.793	0.7864	0.8547	0.9004	0.8207	0.8	0.7694	0.7968	0.8629	0.8406	0.8456	0.9047	0.9062	0.9457	0.9164	0.9261	0.9253	0.9514	0.9466	0.9848	0.1253
GO:0014033_neural_crest_cell_differentiation	0.09231	0.02167	0.5569	0.4214	0.5918	0.3752	0.5285	0.6976	0.7517	0.5794	0.7185	0.7141	0.7868	0.8523	0.8695	0.7807	0.8045	0.7906	0.8181	0.8099	0.8757	0.9004	0.8207	0.7892	0.8207	0.814	0.8564	0.8407	0.896	0.9138	0.9218	0.9457	0.9164	0.9298	0.9156	0.9514	0.9482	0.9848	0.0006522
GO:0014032_neural_crest_cell_development	0.09231	0.02167	0.5569	0.4214	0.5918	0.3752	0.5285	0.6976	0.7517	0.5794	0.7185	0.7141	0.7868	0.8523	0.8695	0.7807	0.8045	0.7906	0.8181	0.8099	0.8757	0.9004	0.8207	0.7892	0.8207	0.814	0.8564	0.8407	0.896	0.9138	0.9218	0.9457	0.9164	0.9298	0.9156	0.9514	0.9482	0.9848	0.0006522
GO:0048167_regulation_of_synaptic_plasticity	0.02684	0.06154	0.6332	0.4317	0.5435	0.6933	0.4235	0.5144	0.7065	0.6147	0.6928	0.7566	0.7289	0.6953	0.8641	0.7681	0.7502	0.754	0.7979	0.7864	0.8412	0.881	0.7903	0.7807	0.7694	0.7269	0.8629	0.8381	0.8611	0.9096	0.9062	0.9457	0.905	0.9286	0.9243	0.9514	0.9465	0.9848	0.001023
GO:0048701_embryonic_cranial_skeleton_morphogenesis	0.0456	0.02782	0.475	0.5689	0.5609	0.6915	0.3756	0.5176	0.63	0.6735	0.7659	0.7178	0.6949	0.7472	0.7959	0.7881	0.8065	0.7969	0.8392	0.8164	0.8547	0.8811	0.7741	0.8167	0.7815	0.8285	0.8629	0.8635	0.8616	0.9293	0.9165	0.9481	0.9164	0.9298	0.8724	0.9514	0.9482	0.9848	0.01635
GO:0001825_blastocyst_formation	0.1643	0.008937	0.6008	0.4989	0.5482	0.7163	0.4235	0.7386	0.6756	0.5597	0.7059	0.6525	0.7459	0.812	0.867	0.7807	0.7605	0.7848	0.793	0.8085	0.8757	0.8313	0.8486	0.7892	0.7887	0.8096	0.8629	0.8381	0.8456	0.908	0.9122	0.9287	0.9164	0.9286	0.9194	0.9514	0.9466	0.9848	0.06335
GO:0001829_trophectodermal_cell_differentiation	0.1228	0.02337	0.5841	0.5094	0.6356	0.7449	0.4235	0.7557	0.6756	0.566	0.7187	0.6682	0.7469	0.8129	0.867	0.7881	0.7606	0.7848	0.7979	0.8056	0.8757	0.8334	0.8503	0.7904	0.8053	0.8096	0.8742	0.8394	0.8491	0.908	0.9122	0.9277	0.9164	0.9286	0.9156	0.9514	0.9466	0.9848	0.09264
GO:0043407_negative_regulation_of_MAP_kinase_activity	0.1724	0.003788	0.4734	0.5064	0.5219	0.5556	0.55	0.4798	0.5969	0.4051	0.6078	0.4572	0.6648	0.7322	0.6581	0.7037	0.7319	0.7154	0.7498	0.7456	0.8225	0.7759	0.7726	0.7571	0.7845	0.8096	0.8317	0.8192	0.817	0.8509	0.9005	0.8633	0.8982	0.9227	0.847	0.9398	0.8594	0.9848	0.01827
GO:0055001_muscle_cell_development	0.4123	0.03721	0.4144	0.5597	0.5435	0.6868	0.4752	0.4785	0.7493	0.4926	0.6531	0.6458	0.6523	0.7578	0.7169	0.5898	0.675	0.7058	0.7218	0.7809	0.804	0.8313	0.7271	0.7473	0.7659	0.7363	0.8317	0.7826	0.8453	0.8114	0.864	0.8962	0.8982	0.8372	0.8755	0.9083	0.884	0.9848	0.08655
GO:0006022_aminoglycan_metabolic_process	0.3696	0.03914	0.6556	0.6309	0.3972	0.5729	0.5105	0.5517	0.6679	0.5438	0.6841	0.6391	0.7124	0.6473	0.6959	0.7493	0.7717	0.7594	0.7498	0.7456	0.8086	0.9004	0.6803	0.7537	0.719	0.7269	0.8145	0.8027	0.8611	0.8692	0.9005	0.9091	0.9029	0.9261	0.8558	0.9398	0.931	0.9848	0.1208
GO:0030203_glycosaminoglycan_metabolic_process	0.4329	0.03698	0.7335	0.6236	0.5537	0.6117	0.5039	0.5323	0.6756	0.5967	0.7427	0.6805	0.7274	0.6512	0.6949	0.7493	0.7791	0.7606	0.7811	0.7756	0.8086	0.9004	0.7229	0.7644	0.7416	0.7224	0.8449	0.8314	0.8611	0.8728	0.9005	0.9277	0.9029	0.9286	0.8755	0.9407	0.9446	0.9848	0.15
GO:0046883_regulation_of_hormone_secretion	0.3545	0.02648	0.8139	0.5094	0.3706	0.3901	0.614	0.736	0.63	0.6402	0.7427	0.7167	0.811	0.7723	0.8883	0.7553	0.7429	0.7673	0.7605	0.8099	0.8402	0.833	0.7903	0.7537	0.7285	0.7224	0.8449	0.8381	0.8611	0.8509	0.9005	0.9457	0.9029	0.9166	0.8868	0.9375	0.9466	0.9848	0.02677
GO:0060341_regulation_of_cellular_localization	0.3056	0.03084	0.7665	0.556	0.3772	0.591	0.4314	0.6067	0.5748	0.5964	0.7442	0.6945	0.7724	0.8035	0.8855	0.7554	0.7836	0.7906	0.8185	0.7974	0.8412	0.833	0.8136	0.7537	0.7659	0.8012	0.8507	0.8407	0.859	0.9292	0.9062	0.9457	0.9164	0.9286	0.9008	0.9398	0.9466	0.9848	0.001328
GO:0019725_cellular_homeostasis	0.1311	0.03183	0.6795	0.3445	0.5099	0.554	0.7077	0.8498	0.6756	0.5597	0.6541	0.6857	0.6799	0.7322	0.6481	0.7068	0.7633	0.6818	0.8181	0.7974	0.8412	0.8127	0.7552	0.7319	0.7815	0.8103	0.8629	0.7893	0.8456	0.9077	0.9163	0.9457	0.8982	0.9286	0.9008	0.9514	0.927	0.9848	0.01629
GO:0055082_cellular_chemical_homeostasis	0.2507	0.005441	0.8297	0.4162	0.3727	0.591	0.5455	0.7956	0.7065	0.6068	0.7223	0.7178	0.6623	0.7214	0.7922	0.7553	0.8045	0.745	0.8392	0.8164	0.8682	0.8779	0.7628	0.7789	0.7854	0.8192	0.8742	0.8144	0.8787	0.922	0.9261	0.9483	0.9029	0.9298	0.9018	0.9514	0.9466	0.9848	0.002585
GO:0006873_cellular_ion_homeostasis	0.2531	0.003976	0.8102	0.4358	0.3985	0.6007	0.5827	0.8207	0.7211	0.5964	0.7215	0.7178	0.6832	0.7323	0.7826	0.7554	0.8045	0.7437	0.8392	0.8164	0.8733	0.8811	0.7726	0.7793	0.8028	0.8256	0.8849	0.8144	0.8787	0.9247	0.9261	0.9483	0.9029	0.9298	0.9156	0.9514	0.9466	0.9848	0.002002
GO:0043193_positive_regulation_of_gene-specific_transcription	0.02555	0.227	0.3242	0.5604	0.4956	0.5768	0.6913	0.6945	0.5969	0.478	0.5738	0.6391	0.6623	0.7484	0.8431	0.7242	0.71	0.7154	0.8122	0.6306	0.7869	0.8127	0.7391	0.7892	0.7845	0.8611	0.8564	0.8381	0.8279	0.8978	0.903	0.9277	0.8982	0.9261	0.8724	0.9398	0.9446	0.9848	0.01984
GO:0042692_muscle_cell_differentiation	0.006536	0.001794	0.3168	0.514	0.4468	0.5674	0.6403	0.6786	0.7453	0.4354	0.633	0.6442	0.784	0.8344	0.9074	0.7493	0.7367	0.745	0.7556	0.8099	0.855	0.8694	0.8207	0.78	0.7876	0.8103	0.8629	0.8381	0.8786	0.877	0.9062	0.9308	0.9164	0.9261	0.9335	0.9514	0.9446	0.9848	3.717e-05
GO:0032583_regulation_of_gene-specific_transcription	0.0002345	0.0574	0.2814	0.6627	0.5359	0.6242	0.7409	0.6742	0.7065	0.5544	0.6541	0.6832	0.8292	0.8148	0.8806	0.7781	0.7624	0.7837	0.8392	0.7411	0.8726	0.9004	0.8136	0.8098	0.8456	0.8852	0.8844	0.8691	0.8705	0.9247	0.9122	0.9457	0.9164	0.9298	0.9142	0.9514	0.9466	0.9848	0.0002466
GO:0007498_mesoderm_development	7.319e-05	0.001794	0.384	0.6167	0.2454	0.5637	0.5777	0.5624	0.7161	0.303	0.6614	0.6374	0.8433	0.8385	0.8596	0.7806	0.8139	0.7931	0.7979	0.8164	0.8994	0.9106	0.8207	0.8166	0.7876	0.8466	0.8564	0.8682	0.8877	0.9315	0.9255	0.9457	0.9291	0.9298	0.936	0.9591	0.9489	0.9848	0.000413
GO:0001822_kidney_development	0.0002614	0.003472	0.3776	0.6765	0.3866	0.4916	0.7205	0.6461	0.7588	0.4381	0.6206	0.6458	0.9125	0.8665	0.9031	0.8024	0.7962	0.7906	0.8181	0.8164	0.8967	0.8624	0.8919	0.8241	0.8538	0.8852	0.9115	0.8635	0.8611	0.9247	0.9343	0.9457	0.9181	0.9338	0.9197	0.9589	0.9465	0.9848	3.717e-05
GO:0007369_gastrulation	4.072e-05	0.01134	0.3874	0.7148	0.3524	0.6348	0.6709	0.6742	0.7635	0.4497	0.7215	0.6525	0.8931	0.9002	0.9127	0.8075	0.8139	0.7906	0.8181	0.8426	0.9023	0.9181	0.8549	0.8399	0.8663	0.8964	0.8863	0.8651	0.8787	0.9315	0.9343	0.9308	0.9181	0.9356	0.9492	0.9591	0.9466	0.9848	0.0002466
GO:0060537_muscle_tissue_development	0.01405	0.03178	0.4015	0.6531	0.3712	0.7021	0.5067	0.6461	0.7485	0.5326	0.6541	0.7184	0.7668	0.8323	0.8011	0.7733	0.7717	0.7513	0.8076	0.8174	0.8804	0.8951	0.8491	0.7904	0.8445	0.8728	0.8904	0.8394	0.8845	0.9001	0.9252	0.9457	0.9164	0.9286	0.9322	0.9591	0.9465	0.9848	3.717e-05
GO:0014706_striated_muscle_tissue_development	0.01706	0.02687	0.4112	0.6926	0.3535	0.7392	0.5609	0.6627	0.7453	0.5287	0.6682	0.7178	0.7759	0.8402	0.8154	0.7733	0.7717	0.7513	0.8122	0.8174	0.885	0.8897	0.8503	0.7911	0.8483	0.8756	0.8934	0.8406	0.8787	0.9008	0.9218	0.9457	0.9165	0.9286	0.9335	0.9591	0.9466	0.9848	3.717e-05
GO:0060538_skeletal_muscle_organ_development	0.004324	0.02154	0.5006	0.71	0.2946	0.7131	0.6257	0.7338	0.6799	0.5543	0.7223	0.7171	0.816	0.8435	0.8317	0.8075	0.823	0.8029	0.8357	0.8269	0.9023	0.9004	0.8798	0.8371	0.848	0.8852	0.9005	0.8783	0.8963	0.9209	0.93	0.9483	0.9386	0.9298	0.9202	0.9591	0.9489	0.9848	0.0001063
GO:0007519_skeletal_muscle_tissue_development	0.004324	0.02154	0.5006	0.71	0.2946	0.7131	0.6257	0.7338	0.6799	0.5543	0.7223	0.7171	0.816	0.8435	0.8317	0.8075	0.823	0.8029	0.8357	0.8269	0.9023	0.9004	0.8798	0.8371	0.848	0.8852	0.9005	0.8783	0.8963	0.9209	0.93	0.9483	0.9386	0.9298	0.9202	0.9591	0.9489	0.9848	0.0001063
GO:0032312_regulation_of_ARF_GTPase_activity	7.319e-05	0.007355	0.1564	0.4486	0.484	0.4301	0.4006	0.6461	0.7828	0.5998	0.6717	0.7178	0.7518	0.8472	0.78	0.795	0.804	0.7837	0.7642	0.8099	0.8547	0.8811	0.7924	0.7892	0.7694	0.8096	0.8564	0.8381	0.8724	0.8959	0.9122	0.9457	0.9162	0.9298	0.911	0.8837	0.93	0.9848	0.004573
GO:0048646_anatomical_structure_formation_involved_in_morphogenesis	4.072e-05	0.0002757	0.2522	0.5889	0.3349	0.5536	0.324	0.5101	0.5592	0.5404	0.7499	0.7167	0.8141	0.8317	0.857	0.798	0.8045	0.7906	0.8392	0.8426	0.9023	0.9006	0.8503	0.8157	0.8483	0.8852	0.9159	0.8783	0.879	0.9315	0.9374	0.9483	0.9363	0.9545	0.949	0.9628	0.9489	0.9848	3.717e-05
GO:0021766_hippocampus_development	0.007544	0.2512	0.2202	0.4395	0.5791	0.5651	0.6442	0.6433	0.63	0.6432	0.7586	0.6699	0.8597	0.7303	0.6581	0.8075	0.8053	0.8029	0.8042	0.8174	0.8757	0.8523	0.8245	0.8298	0.8483	0.8756	0.8849	0.8635	0.8456	0.9152	0.9163	0.9337	0.9164	0.9298	0.847	0.9514	0.9465	0.9848	0.1481
GO:0043087_regulation_of_GTPase_activity	0.005139	0.07501	0.2373	0.6295	0.4578	0.6868	0.6336	0.5617	0.7517	0.7009	0.794	0.7571	0.8651	0.853	0.7008	0.8075	0.8226	0.8029	0.8392	0.8335	0.9023	0.9004	0.8327	0.8371	0.8516	0.8909	0.9159	0.8635	0.8877	0.9247	0.9323	0.9483	0.9164	0.9508	0.8968	0.9591	0.9115	0.8955	0.08862
GO:0021799_cerebral_cortex_radially_oriented_cell_migration	0.04519	0.02635	0.3729	0.6037	0.6822	0.6439	0.4871	0.5953	0.7485	0.7422	0.797	0.7739	0.7169	0.7484	0.767	0.8075	0.823	0.8021	0.8392	0.8511	0.8774	0.8688	0.8136	0.8144	0.8478	0.8713	0.8849	0.8635	0.8786	0.9315	0.93	0.9483	0.9165	0.9338	0.8959	0.9514	0.9482	0.9848	0.2635
GO:0021795_cerebral_cortex_cell_migration	0.0248	0.06778	0.2592	0.5214	0.6793	0.6166	0.5045	0.6215	0.6898	0.7134	0.7883	0.7543	0.7886	0.7892	0.7412	0.8043	0.8053	0.7931	0.8392	0.8404	0.8804	0.9004	0.8503	0.8371	0.8663	0.8846	0.9173	0.875	0.8787	0.9315	0.9374	0.9481	0.9291	0.9382	0.9284	0.953	0.9482	0.9848	0.1135
GO:0021885_forebrain_cell_migration	0.01705	0.07877	0.3729	0.5563	0.7057	0.6023	0.4686	0.6461	0.6756	0.7402	0.797	0.7599	0.7923	0.7637	0.7354	0.8075	0.8215	0.8029	0.8433	0.8404	0.8774	0.9004	0.8503	0.8422	0.8739	0.8852	0.9269	0.8806	0.8845	0.9315	0.9374	0.9483	0.9291	0.9508	0.9142	0.9589	0.9487	0.9848	0.1325
GO:0014037_Schwann_cell_differentiation	0.03069	0.218	0.4203	0.4544	0.6937	0.6012	0.4661	0.6461	0.7751	0.7249	0.7743	0.8123	0.7159	0.8042	0.7947	0.7988	0.8349	0.8029	0.8392	0.8511	0.9023	0.8811	0.8207	0.8206	0.8538	0.8756	0.8629	0.8635	0.8611	0.9315	0.9343	0.9483	0.9165	0.9338	0.9156	0.9589	0.9489	0.9848	0.2332
GO:0035136_forelimb_morphogenesis	0.02797	0.1778	0.6574	0.7322	0.5735	0.5776	0.6254	0.7321	0.7065	0.396	0.4811	0.6189	0.8563	0.782	0.689	0.7866	0.7533	0.745	0.793	0.7545	0.8615	0.8127	0.8549	0.6252	0.8516	0.8852	0.8352	0.8422	0.8688	0.885	0.9062	0.9308	0.9164	0.9286	0.9464	0.9514	0.9465	0.9848	0.001822
GO:0035115_embryonic_forelimb_morphogenesis	0.03645	0.1824	0.6791	0.6953	0.6284	0.6416	0.7537	0.7574	0.7517	0.5114	0.4922	0.6336	0.8857	0.8144	0.7803	0.7924	0.7717	0.725	0.7979	0.7869	0.8774	0.8313	0.8675	0.6242	0.8857	0.8882	0.8564	0.8394	0.8785	0.9081	0.9163	0.9457	0.9164	0.9298	0.9492	0.9589	0.9455	0.9848	0.002592
GO:0032147_activation_of_protein_kinase_activity	0.04928	0.074	0.4642	0.591	0.451	0.6403	0.871	0.8884	0.5969	0.5964	0.7427	0.6838	0.9116	0.8385	0.9238	0.7866	0.8045	0.7837	0.807	0.8174	0.8682	0.9004	0.8448	0.8041	0.7709	0.8096	0.8629	0.875	0.8611	0.8993	0.9163	0.9287	0.9164	0.9286	0.8999	0.9514	0.9466	0.9848	0.2435
GO:0009649_entrainment_of_circadian_clock	0.1643	0.04585	0.5597	0.4828	0.5435	0.7018	0.7059	0.8072	0.8009	0.5811	0.7368	0.7033	0.8563	0.8988	0.9238	0.7866	0.8053	0.7931	0.7642	0.8695	0.9023	0.8811	0.8398	0.7892	0.8382	0.8699	0.8629	0.8406	0.8611	0.9247	0.9374	0.9457	0.9165	0.9261	0.949	0.9591	0.9466	0.9848	0.08466
GO:0010559_regulation_of_glycoprotein_biosynthetic_process	0.04708	0.1118	0.5969	0.7085	0.5454	0.3979	0.7653	0.8307	0.7307	0.5717	0.7223	0.6525	0.7897	0.7692	0.8781	0.8027	0.8045	0.7931	0.7979	0.8069	0.8757	0.8127	0.8448	0.8174	0.7861	0.8838	0.8564	0.844	0.8611	0.9173	0.9062	0.9457	0.9164	0.9286	0.8977	0.9514	0.8754	0.9848	0.1589
GO:0035239_tube_morphogenesis	4.072e-05	0.0009575	0.6673	0.6967	0.5241	0.542	0.6652	0.7671	0.6672	0.6147	0.7953	0.6682	0.8433	0.8507	0.7896	0.8027	0.8367	0.8029	0.8392	0.8434	0.9023	0.8811	0.8448	0.8173	0.8503	0.8852	0.9186	0.8635	0.885	0.9446	0.9374	0.9504	0.9291	0.9586	0.936	0.9591	0.9482	0.9848	0.0002466
GO:0060429_epithelium_development	7.319e-05	0.002424	0.762	0.7322	0.3193	0.5637	0.7336	0.8235	0.6925	0.6109	0.7919	0.64	0.8914	0.8811	0.9005	0.8244	0.8505	0.8209	0.8392	0.8303	0.9097	0.8829	0.8985	0.8432	0.8857	0.9156	0.9192	0.8882	0.8975	0.9446	0.9374	0.9483	0.9367	0.9605	0.949	0.9628	0.9489	0.9848	0.0002298
GO:0002009_morphogenesis_of_an_epithelium	7.319e-05	0.002424	0.762	0.7322	0.3193	0.5637	0.7336	0.8235	0.6925	0.6109	0.7919	0.64	0.8914	0.8811	0.9005	0.8244	0.8505	0.8209	0.8392	0.8303	0.9097	0.8829	0.8985	0.8432	0.8857	0.9156	0.9192	0.8882	0.8975	0.9446	0.9374	0.9483	0.9367	0.9605	0.949	0.9628	0.9489	0.9848	0.0002298
GO:0042474_middle_ear_morphogenesis	0.2096	0.0449	0.5751	0.6037	0.2141	0.6849	0.4235	0.5617	0.742	0.7475	0.8147	0.7588	0.721	0.7322	0.6865	0.7943	0.8139	0.8029	0.8392	0.8164	0.8486	0.8583	0.7924	0.8058	0.7815	0.8611	0.8849	0.8563	0.8616	0.928	0.9125	0.9481	0.905	0.9286	0.847	0.9514	0.9466	0.9848	0.1337
GO:0048538_thymus_development	0.01929	0.08789	0.6116	0.5958	0.2233	0.7108	0.4162	0.5199	0.7803	0.6962	0.7821	0.7471	0.6609	0.7645	0.713	0.795	0.8139	0.7931	0.8535	0.8655	0.8827	0.7003	0.8195	0.801	0.8857	0.8914	0.9226	0.8422	0.8802	0.936	0.9343	0.9504	0.9164	0.9511	0.8755	0.9523	0.9482	0.9848	0.03321
GO:0051179_localization	4.072e-05	0.007907	0.5827	0.6926	0.1972	0.7545	0.4722	0.6902	0.7457	0.6848	0.797	0.7505	0.8535	0.8716	0.7354	0.8034	0.8045	0.8029	0.8392	0.8426	0.9169	0.9106	0.8745	0.8173	0.8811	0.8852	0.9159	0.8662	0.9159	0.9292	0.9374	0.9632	0.9367	0.9505	0.9492	0.9628	0.9165	0.9848	3.717e-05
GO:0022603_regulation_of_anatomical_structure_morphogenesis	0.004414	0.01648	0.6596	0.6028	0.1696	0.7206	0.4542	0.57	0.6782	0.7258	0.8172	0.7622	0.8433	0.8435	0.8714	0.8707	0.8707	0.862	0.8824	0.8738	0.9104	0.9025	0.9009	0.8851	0.8914	0.9191	0.9307	0.9155	0.8877	0.9523	0.9374	0.9701	0.9533	0.9636	0.936	0.9648	0.9736	0.9848	3.717e-05
GO:0006811_ion_transport	0.3005	0.0002757	0.6662	0.5694	0.1547	0.6894	0.3858	0.5764	0.6756	0.749	0.8637	0.7889	0.748	0.8272	0.8165	0.8324	0.8889	0.8662	0.8825	0.8806	0.919	0.9025	0.8245	0.4307	0.8857	0.9052	0.9336	0.9069	0.9322	0.9482	0.939	0.986	0.9538	0.9639	0.949	0.9628	0.9736	0.9848	0.000136
GO:0006812_cation_transport	0.237	0.02571	0.6964	0.5744	0.3703	0.7053	0.353	0.5663	0.6782	0.7252	0.818	0.765	0.7477	0.8082	0.7386	0.8075	0.8813	0.8564	0.8721	0.8655	0.919	0.9064	0.8207	0.6183	0.8857	0.9052	0.9197	0.8984	0.9234	0.9482	0.9374	0.9769	0.9421	0.9622	0.945	0.9628	0.9736	0.9848	0.0004684
GO:0044057_regulation_of_system_process	0.09637	6.519e-05	0.8895	0.6008	0.02344	0.6587	0.4235	0.6763	0.7485	0.7166	0.8172	0.8314	0.876	0.8583	0.9031	0.8344	0.8707	0.8515	0.8592	0.8905	0.9185	0.9212	0.8786	0.4307	0.8516	0.8729	0.9159	0.8984	0.9159	0.9482	0.9374	0.9701	0.9492	0.9605	0.949	0.9628	0.9736	0.9848	3.717e-05
GO:0005976_polysaccharide_metabolic_process	0.4496	0.02167	0.7111	0.7274	0.272	0.6868	0.7264	0.6837	0.693	0.6561	0.7702	0.7302	0.8391	0.7318	0.6908	0.7988	0.823	0.8081	0.828	0.8164	0.8682	0.9112	0.7986	0.8098	0.7845	0.8411	0.8629	0.8635	0.8605	0.9247	0.7313	0.9457	0.8507	0.9382	0.8681	0.9514	0.9466	0.9848	0.1522
GO:0046888_negative_regulation_of_hormone_secretion	0.4797	0.1307	0.8262	0.5787	0.0145	0.6023	0.5609	0.6864	0.7755	0.5969	0.7654	0.7425	0.7908	0.8035	0.8405	0.7744	0.7836	0.7906	0.8294	0.8269	0.8774	0.8694	0.8207	0.787	0.8093	0.8103	0.8629	0.85	0.8787	0.9127	0.9062	0.9457	0.9164	0.9298	0.9018	0.9514	0.9466	0.9848	0.03176
GO:0007269_neurotransmitter_secretion	0.1987	0.2139	0.6038	0.6579	0.005932	0.8146	0.6405	0.709	0.7181	0.6404	0.7962	0.7599	0.8689	0.8559	0.7354	0.7988	0.82	0.7906	0.8386	0.8515	0.9023	0.9025	0.8414	0.8098	0.8516	0.8552	0.8904	0.8635	0.885	0.9315	0.9343	0.9483	0.9185	0.9298	0.9194	0.9514	0.9489	0.9848	0.196
GO:0001505_regulation_of_neurotransmitter_levels	0.3054	0.1923	0.6964	0.6812	0.005932	0.8406	0.6565	0.6546	0.7876	0.7422	0.8301	0.83	0.8918	0.858	0.7429	0.8239	0.8509	0.8471	0.8448	0.8725	0.9132	0.903	0.8786	0.8522	0.8682	0.8848	0.9307	0.8944	0.9153	0.9446	0.9374	0.9701	0.9412	0.9391	0.9221	0.9591	0.958	0.9848	0.02362
GO:0046326_positive_regulation_of_glucose_import	0.04456	0.06767	0.4234	0.6353	0.1306	0.5554	0.7264	0.8781	0.816	0.724	0.7249	0.8123	0.8826	0.8507	0.9099	0.8034	0.7794	0.8029	0.8219	0.8426	0.8967	0.9025	0.8868	0.8432	0.8648	0.8628	0.9092	0.8635	0.8877	0.9292	0.9343	0.9483	0.9329	0.9382	0.9518	0.9591	0.9482	0.9848	0.02262
GO:0010828_positive_regulation_of_glucose_transport	0.04456	0.06767	0.4234	0.6353	0.1306	0.5554	0.7264	0.8781	0.816	0.724	0.7249	0.8123	0.8826	0.8507	0.9099	0.8034	0.7794	0.8029	0.8219	0.8426	0.8967	0.9025	0.8868	0.8432	0.8648	0.8628	0.9092	0.8635	0.8877	0.9292	0.9343	0.9483	0.9329	0.9382	0.9518	0.9591	0.9482	0.9848	0.02262
GO:0001656_metanephros_development	0.05321	0.04371	0.7217	0.65	0.1883	0.5637	0.6141	0.6574	0.8033	0.7067	0.7856	0.7599	0.8829	0.8646	0.8216	0.8075	0.8378	0.8138	0.8392	0.8404	0.8955	0.8534	0.8786	0.8371	0.8547	0.8852	0.9159	0.8856	0.8787	0.9421	0.9374	0.9495	0.9291	0.9568	0.9221	0.9591	0.9466	0.9848	0.0005336
GO:0001756_somitogenesis	0.113	0.04801	0.7778	0.6401	0.1093	0.733	0.746	0.7513	0.7997	0.7025	0.7919	0.7836	0.863	0.8523	0.8999	0.8027	0.8384	0.8138	0.8392	0.8231	0.9023	0.9161	0.8413	0.7892	0.8413	0.8909	0.8629	0.8635	0.9062	0.9315	0.9261	0.9484	0.9165	0.9298	0.9202	0.9591	0.9489	0.9848	0.03365
GO:0014911_positive_regulation_of_smooth_muscle_cell_migration	0.1541	0.4494	0.5831	0.7603	0.03706	0.6797	0.7067	0.6761	0.7828	0.7719	0.7427	0.8317	0.9084	0.8716	0.6949	0.8015	0.8044	0.8103	0.8293	0.8404	0.8762	0.8662	0.8503	0.8041	0.8516	0.8852	0.8849	0.8635	0.8735	0.9173	0.9163	0.9457	0.905	0.9298	0.9156	0.9514	0.8543	0.9848	0.1168
GO:0000082_G1/S_transition_of_mitotic_cell_cycle	0.002256	0.3949	0.5098	0.5641	0.1051	0.8043	0.786	0.8635	0.7751	0.7387	0.8304	0.7543	0.867	0.8791	0.7777	0.7972	0.8133	0.8021	0.8346	0.8707	0.8785	0.9081	0.8448	0.7904	0.7845	0.8479	0.8849	0.8635	0.8933	0.9315	0.9343	0.9504	0.9165	0.9298	0.9369	0.9516	0.9544	0.9848	0.3022
GO:0006909_phagocytosis	0.4137	0.03639	0.5333	0.5918	0.6821	0.4847	0.4339	0.6211	0.7097	0.6921	0.6682	0.7178	0.7518	0.7683	0.6581	0.7738	0.8065	0.8029	0.8378	0.7343	0.8548	0.8445	0.8001	0.6697	0.848	0.8846	0.8646	0.846	0.8611	0.8963	0.9062	0.9457	0.9164	0.9298	0.847	0.9514	0.9466	0.9848	0.00227
GO:0051050_positive_regulation_of_transport	0.364	0.003937	0.6193	0.3277	0.434	0.5174	0.3691	0.7254	0.688	0.6417	0.7223	0.7328	0.6681	0.739	0.7288	0.719	0.7791	0.745	0.8378	0.7917	0.8086	0.8313	0.7961	0.7649	0.7659	0.7968	0.8449	0.8381	0.8611	0.9209	0.9062	0.9481	0.9029	0.9281	0.847	0.9514	0.9446	0.9848	0.02298
GO:0046890_regulation_of_lipid_biosynthetic_process	0.5145	0.04765	0.7064	0.4566	0.5712	0.6335	0.4686	0.7338	0.6756	0.6921	0.7717	0.7459	0.7412	0.7322	0.6606	0.7554	0.8045	0.7606	0.7979	0.8126	0.8285	0.833	0.7741	0.7771	0.7659	0.7363	0.8629	0.8144	0.8279	0.8909	0.9062	0.9481	0.9029	0.9286	0.8755	0.9398	0.9446	0.9848	0.1411
GO:0030005_cellular_di-,_tri-valent_inorganic_cation_homeostasis	0.5314	0.02113	0.7039	0.4342	0.4701	0.591	0.2687	0.6742	0.7308	0.7341	0.798	0.7898	0.6209	0.7322	0.7544	0.7733	0.8378	0.7931	0.8516	0.8426	0.8682	0.9004	0.7628	0.7807	0.8382	0.8466	0.9035	0.8454	0.9083	0.9315	0.9343	0.9701	0.9164	0.9298	0.8755	0.9514	0.9568	0.9848	0.02152
GO:0055066_di-,_tri-valent_inorganic_cation_homeostasis	0.5317	0.02218	0.7777	0.4183	0.4623	0.6261	0.3264	0.7366	0.7453	0.7422	0.8172	0.8119	0.6648	0.7322	0.7811	0.7771	0.8406	0.8026	0.8643	0.8611	0.8726	0.9025	0.7739	0.7882	0.844	0.8466	0.9159	0.8586	0.9159	0.9315	0.9374	0.9701	0.9165	0.938	0.8902	0.9589	0.958	0.9848	0.01143
GO:0008544_epidermis_development	0.5262	0.02782	0.8057	0.4162	0.573	0.562	0.4533	0.5416	0.7876	0.7368	0.797	0.8394	0.7149	0.7484	0.7544	0.7733	0.8135	0.8021	0.8392	0.8404	0.8733	0.9004	0.8136	0.7807	0.7921	0.7968	0.8844	0.8454	0.9083	0.9315	0.9349	0.9701	0.9291	0.9382	0.9156	0.9589	0.9529	0.9848	0.04046
GO:0048545_response_to_steroid_hormone_stimulus	0.4976	0.02783	0.7001	0.5608	0.38	0.5389	0.4871	0.5032	0.7509	0.724	0.797	0.8402	0.872	0.8716	0.7221	0.8288	0.8338	0.8512	0.8392	0.8725	0.9023	0.9081	0.8893	0.8435	0.8516	0.8621	0.9159	0.8984	0.9106	0.9446	0.9374	0.9677	0.9421	0.9382	0.945	0.9591	0.9736	0.9848	0.0002466
GO:0031099_regeneration	0.3255	0.004885	0.6855	0.5652	0.3381	0.6533	0.4235	0.5192	0.791	0.8069	0.8684	0.8478	0.821	0.8297	0.6888	0.8639	0.8635	0.8686	0.8824	0.898	0.9023	0.9106	0.8793	0.8432	0.8446	0.8713	0.9159	0.9126	0.9322	0.9468	0.939	0.9784	0.9492	0.9605	0.9289	0.9591	0.9736	0.9848	0.004953
GO:0000188_inactivation_of_MAPK_activity	0.3653	0.007352	0.6465	0.5597	0.6127	0.6894	0.6501	0.7321	0.7065	0.5698	0.7249	0.6334	0.7641	0.8365	0.8308	0.7744	0.7836	0.7906	0.8182	0.8099	0.8682	0.833	0.8245	0.7892	0.8483	0.8852	0.8629	0.8482	0.8456	0.9123	0.9163	0.9206	0.9137	0.9286	0.8977	0.9514	0.9446	0.9848	0.1971
GO:0043405_regulation_of_MAP_kinase_activity	0.4217	0.04765	0.5569	0.7013	0.6821	0.8188	0.6914	0.6989	0.6533	0.6404	0.7752	0.6525	0.8232	0.8719	0.8692	0.7866	0.823	0.7906	0.8392	0.8446	0.8955	0.8265	0.8503	0.8167	0.8862	0.8909	0.9159	0.8635	0.8457	0.9292	0.9343	0.9457	0.9164	0.9503	0.9226	0.9514	0.8864	0.9848	0.02807
GO:0050654_chondroitin_sulfate_proteoglycan_metabolic_process	0.269	0.02067	0.7517	0.7482	0.6859	0.6868	0.5467	0.8393	0.7181	0.6903	0.797	0.7555	0.7897	0.7764	0.8861	0.8025	0.8194	0.8029	0.8392	0.8174	0.8733	0.9004	0.8207	0.8168	0.8382	0.8447	0.8629	0.8635	0.889	0.928	0.9163	0.9481	0.9165	0.9298	0.8887	0.9514	0.9489	0.9848	0.1944
GO:0030204_chondroitin_sulfate_metabolic_process	0.3696	0.02635	0.8079	0.7231	0.66	0.7603	0.6149	0.8607	0.7497	0.7029	0.8083	0.7743	0.7492	0.8148	0.8803	0.8015	0.823	0.8029	0.8392	0.8308	0.8774	0.9081	0.815	0.8144	0.8503	0.8756	0.8719	0.8635	0.8933	0.9315	0.9252	0.9526	0.9181	0.9356	0.9197	0.9591	0.9482	0.9848	0.1805
GO:0007512_adult_heart_development	0.4432	0.01643	0.7227	0.6957	0.7336	0.75	0.6249	0.7254	0.7991	0.7381	0.8126	0.7416	0.8285	0.8719	0.9003	0.8075	0.8257	0.8154	0.8515	0.8725	0.8994	0.9085	0.8207	0.7934	0.8538	0.8852	0.9159	0.8635	0.8877	0.9446	0.9343	0.9483	0.9165	0.9487	0.9289	0.9591	0.9489	0.9848	0.1702
GO:0006937_regulation_of_muscle_contraction	0.574	0.00772	0.8344	0.5141	0.5725	0.7131	0.6783	0.7373	0.7751	0.692	0.7763	0.7617	0.7657	0.7495	0.8007	0.7776	0.8081	0.7931	0.8181	0.8341	0.8611	0.851	0.8207	0.5397	0.7812	0.7794	0.8617	0.8454	0.8611	0.8959	0.9062	0.9457	0.9164	0.9261	0.8755	0.9514	0.9466	0.9848	0.1081
GO:0055075_potassium_ion_homeostasis	0.4086	0.03	0.7784	0.6979	0.6447	0.733	0.7762	0.5626	0.7588	0.6756	0.7962	0.7459	0.8944	0.8739	0.7021	0.8015	0.8065	0.7969	0.7979	0.8404	0.8896	0.8811	0.8448	0.6183	0.8392	0.8696	0.8807	0.85	0.8456	0.9001	0.9261	0.9429	0.9164	0.8607	0.8991	0.9514	0.9466	0.9848	0.4095
GO:0007565_female_pregnancy	0.6414	0.0473	0.7652	0.5739	0.7599	0.7438	0.5948	0.6002	0.8387	0.7853	0.8698	0.8478	0.8472	0.8804	0.7844	0.8096	0.8716	0.8662	0.8757	0.8968	0.9023	0.9004	0.8757	0.8371	0.8906	0.8852	0.9301	0.8984	0.9083	0.9457	0.9374	0.9701	0.9361	0.9605	0.9356	0.9591	0.963	0.9848	0.01681
GO:0048747_muscle_fiber_development	0.005582	0.05582	0.2814	0.5236	0.5119	0.6816	0.7077	0.8235	0.6782	0.5212	0.6541	0.6374	0.8488	0.8507	0.9063	0.8015	0.7725	0.7906	0.7979	0.8174	0.8994	0.8874	0.8917	0.8194	0.8423	0.8842	0.8629	0.8657	0.8787	0.9047	0.9163	0.9393	0.9278	0.9286	0.9238	0.953	0.9466	0.9848	0.001554
GO:0048741_skeletal_muscle_fiber_development	0.007071	0.1053	0.2963	0.5976	0.5644	0.704	0.7427	0.8	0.688	0.5444	0.7021	0.6647	0.8651	0.8521	0.8861	0.8075	0.8045	0.8029	0.8249	0.8174	0.9023	0.9004	0.8985	0.8432	0.8516	0.8909	0.8849	0.8882	0.8851	0.9152	0.9261	0.9457	0.9361	0.9298	0.9156	0.9591	0.9482	0.9848	0.002389
GO:0008105_asymmetric_protein_localization	0.01928	0.1021	0.2592	0.6133	0.611	0.7131	0.6435	0.8607	0.7515	0.5969	0.7427	0.6857	0.8157	0.8183	0.7989	0.8075	0.8045	0.7906	0.8122	0.8453	0.885	0.8811	0.8414	0.8399	0.8516	0.8738	0.8863	0.8395	0.8787	0.9209	0.9163	0.9457	0.9165	0.9286	0.9322	0.9514	0.9465	0.9848	0.1737
GO:0010827_regulation_of_glucose_transport	0.0007968	0.02582	0.2739	0.6467	0.4437	0.4891	0.7077	0.8202	0.7517	0.6871	0.7215	0.7571	0.8742	0.8385	0.9014	0.8015	0.7919	0.7969	0.807	0.8591	0.885	0.8876	0.8723	0.8342	0.8483	0.8554	0.8939	0.8632	0.8787	0.9315	0.9343	0.9481	0.9291	0.9382	0.9492	0.9591	0.9466	0.9848	0.002374
GO:0046324_regulation_of_glucose_import	0.0001357	0.03457	0.1757	0.7181	0.5244	0.5733	0.7749	0.8622	0.7838	0.7009	0.7427	0.7656	0.9037	0.8716	0.9137	0.8075	0.8045	0.8029	0.8191	0.87	0.9023	0.9004	0.8917	0.8435	0.8663	0.8762	0.9159	0.8635	0.885	0.9315	0.9374	0.9481	0.9361	0.9511	0.9575	0.9591	0.9466	0.9848	0.005663
GO:0010552_positive_regulation_of_gene-specific_transcription_from_RNA_polymerase_II_promoter	0.001637	0.2764	0.1497	0.6002	0.5521	0.6334	0.8325	0.8184	0.6985	0.5621	0.6531	0.6838	0.8144	0.8035	0.9161	0.7988	0.7766	0.7893	0.8328	0.7411	0.8547	0.8127	0.8388	0.8371	0.8516	0.8909	0.8629	0.8635	0.8456	0.9292	0.9062	0.9308	0.9137	0.9286	0.8868	0.9031	0.7734	0.9848	0.0835
GO:0031334_positive_regulation_of_protein_complex_assembly	0.03684	0.36	0.3331	0.4544	0.5918	0.6849	0.8529	0.844	0.7288	0.5723	0.7185	0.6374	0.8535	0.8385	0.9074	0.795	0.7962	0.759	0.7642	0.8462	0.9023	0.8776	0.866	0.8166	0.8382	0.8762	0.8849	0.8381	0.8611	0.9152	0.9062	0.9091	0.9164	0.9286	0.9206	0.9514	0.926	0.9848	0.2923
GO:0014047_glutamate_secretion	0.02613	0.2325	0.3669	0.5481	0.6029	0.7104	0.8462	0.8976	0.7963	0.5964	0.742	0.6813	0.905	0.8654	0.9267	0.8015	0.7727	0.7848	0.7745	0.8164	0.8959	0.8811	0.8786	0.796	0.8382	0.8285	0.8617	0.8381	0.8786	0.9137	0.9163	0.9457	0.9164	0.9286	0.949	0.9514	0.9465	0.9848	0.149
GO:0035137_hindlimb_morphogenesis	0.002546	0.08603	0.1751	0.5607	0.5816	0.6868	0.8213	0.7557	0.7065	0.5678	0.6973	0.6682	0.8927	0.858	0.9018	0.8075	0.8045	0.7906	0.8246	0.8174	0.8757	0.9004	0.8786	0.8399	0.8483	0.8852	0.8617	0.8635	0.8877	0.9292	0.9163	0.9457	0.9165	0.9298	0.945	0.9591	0.9466	0.9848	0.04312
GO:0007223_Wnt_receptor_signaling_pathway,_calcium_modulating_pathway	0.01057	0.08119	0.2472	0.5066	0.499	0.7401	0.8239	0.7591	0.8	0.5964	0.7709	0.6843	0.9221	0.8739	0.8842	0.8332	0.8105	0.8081	0.8392	0.8269	0.8959	0.8722	0.9052	0.8601	0.8663	0.9007	0.8849	0.8954	0.8787	0.9345	0.9343	0.9457	0.9361	0.9298	0.9374	0.9591	0.9466	0.9848	0.06175
GO:0048340_paraxial_mesoderm_morphogenesis	0.02025	0.2372	0.1433	0.4942	0.5712	0.7206	0.8686	0.8184	0.8596	0.5723	0.7641	0.7501	0.9314	0.9182	0.9161	0.8324	0.8109	0.8138	0.8392	0.8695	0.9132	0.9217	0.8975	0.8655	0.9046	0.9191	0.9159	0.8984	0.8786	0.9315	0.9374	0.9308	0.9178	0.9298	0.9513	0.9591	0.9466	0.9848	0.149
GO:0010551_regulation_of_gene-specific_transcription_from_RNA_polymerase_II_promoter	4.072e-05	0.08478	0.1914	0.7083	0.6216	0.6747	0.8288	0.709	0.7505	0.6584	0.7499	0.7403	0.9067	0.858	0.9031	0.8252	0.8053	0.8029	0.8474	0.8099	0.8994	0.9004	0.8723	0.8584	0.8857	0.9169	0.913	0.9032	0.8786	0.9331	0.9261	0.9457	0.9165	0.9503	0.9194	0.9589	0.8762	0.9848	0.001165
GO:0035116_embryonic_hindlimb_morphogenesis	0.0248	0.2267	0.2877	0.6381	0.6821	0.7131	0.8813	0.709	0.737	0.6921	0.7249	0.7033	0.9101	0.8497	0.9161	0.8251	0.8053	0.7931	0.8392	0.8426	0.885	0.851	0.8876	0.8467	0.8829	0.9052	0.8901	0.8662	0.8871	0.9315	0.9261	0.9457	0.9165	0.9448	0.9322	0.9589	0.9466	0.9848	0.2323
GO:0007440_foregut_morphogenesis	0.02581	0.2159	0.4734	0.3945	0.6675	0.7907	0.6749	0.7679	0.747	0.639	0.7427	0.6945	0.8213	0.8716	0.8819	0.795	0.8053	0.7931	0.8392	0.8404	0.9023	0.8811	0.8503	0.8344	0.8857	0.902	0.9158	0.8635	0.896	0.9315	0.9343	0.9481	0.9165	0.9365	0.9194	0.9591	0.9466	0.9848	0.09584
GO:0022029_telencephalon_cell_migration	0.03257	0.1633	0.3437	0.4426	0.6488	0.7086	0.6081	0.7254	0.747	0.7759	0.833	0.8191	0.872	0.8385	0.7916	0.8369	0.8406	0.8365	0.8644	0.8707	0.9023	0.9106	0.8896	0.8663	0.8939	0.9052	0.9369	0.9054	0.9062	0.9446	0.9374	0.9526	0.9386	0.9605	0.9322	0.9591	0.9529	0.9848	0.2351
GO:0007265_Ras_protein_signal_transduction	0.01355	0.2184	0.3576	0.4369	0.722	0.6123	0.7958	0.7557	0.7751	0.7367	0.7427	0.8394	0.905	0.8716	0.9161	0.7988	0.8024	0.792	0.8392	0.8174	0.885	0.907	0.8798	0.808	0.8857	0.8852	0.9217	0.8422	0.8787	0.9096	0.9343	0.9483	0.9164	0.9298	0.9366	0.9514	0.9317	0.9848	0.005293
GO:0032350_regulation_of_hormone_metabolic_process	0.009625	0.007313	0.4687	0.6395	0.5909	0.6512	0.6025	0.6742	0.7457	0.6469	0.797	0.792	0.8211	0.8579	0.8154	0.8075	0.8413	0.834	0.8392	0.8616	0.9023	0.9004	0.8385	0.8157	0.8563	0.8846	0.8904	0.8662	0.8611	0.9315	0.9374	0.9481	0.9291	0.9508	0.9284	0.9591	0.958	0.9848	0.01446
GO:0043471_regulation_of_cellular_carbohydrate_catabolic_process	0.04773	0.1077	0.3728	0.6167	0.6898	0.8041	0.6495	0.8686	0.7826	0.6921	0.7821	0.7178	0.8433	0.8873	0.9074	0.795	0.8053	0.7848	0.8392	0.8695	0.9023	0.8895	0.8503	0.7936	0.8857	0.8852	0.9269	0.8422	0.885	0.9331	0.9374	0.9457	0.9165	0.9568	0.9492	0.9591	0.9466	0.9848	0.07756
GO:0043470_regulation_of_carbohydrate_catabolic_process	0.04773	0.1077	0.3728	0.6167	0.6898	0.8041	0.6495	0.8686	0.7826	0.6921	0.7821	0.7178	0.8433	0.8873	0.9074	0.795	0.8053	0.7848	0.8392	0.8695	0.9023	0.8895	0.8503	0.7936	0.8857	0.8852	0.9269	0.8422	0.885	0.9331	0.9374	0.9457	0.9165	0.9568	0.9492	0.9591	0.9466	0.9848	0.07756
GO:0065009_regulation_of_molecular_function	0.002546	0.06154	0.3168	0.5397	0.6088	0.7099	0.7472	0.7914	0.7859	0.7352	0.844	0.7403	0.8721	0.8811	0.9099	0.8075	0.8367	0.8021	0.866	0.8688	0.8994	0.9229	0.8468	0.8173	0.8511	0.8852	0.9307	0.8984	0.9072	0.9446	0.9374	0.9504	0.9165	0.9586	0.9156	0.9591	0.9489	0.9848	0.1202
GO:0050790_regulation_of_catalytic_activity	0.03123	0.06778	0.4734	0.5641	0.7042	0.7421	0.75	0.7626	0.7876	0.7475	0.8363	0.7167	0.8779	0.8812	0.9014	0.8075	0.8287	0.7931	0.8551	0.8673	0.8994	0.9254	0.8536	0.8157	0.848	0.8852	0.9227	0.8976	0.9062	0.9421	0.9343	0.9483	0.9165	0.9556	0.9008	0.9589	0.9489	0.9848	0.1304
GO:0043536_positive_regulation_of_blood_vessel_endothelial_cell_migration	0.04387	0.0421	0.3799	0.6834	0.661	0.7425	0.8172	0.8184	0.7364	0.6936	0.7962	0.7332	0.9148	0.9002	0.9014	0.8075	0.8139	0.8029	0.8392	0.8616	0.8757	0.8811	0.883	0.8399	0.8857	0.9052	0.9285	0.8843	0.8611	0.9315	0.9343	0.9457	0.9196	0.9508	0.945	0.9514	0.9466	0.9848	0.07217
GO:0043535_regulation_of_blood_vessel_endothelial_cell_migration	0.02785	0.09982	0.3331	0.7231	0.676	0.8282	0.871	0.8607	0.7446	0.718	0.797	0.7353	0.9314	0.9148	0.9061	0.8075	0.8101	0.8029	0.8392	0.8623	0.8774	0.8811	0.8957	0.8488	0.8911	0.9191	0.9317	0.8903	0.8611	0.9315	0.9343	0.9457	0.9165	0.9511	0.9488	0.9589	0.9466	0.9848	0.1086
GO:0032270_positive_regulation_of_cellular_protein_metabolic_process	0.1238	0.01464	0.3734	0.7733	0.6821	0.7701	0.8566	0.8976	0.7953	0.7249	0.794	0.7268	0.9116	0.8961	0.9018	0.804	0.7962	0.8021	0.8191	0.8685	0.9023	0.8833	0.8779	0.8191	0.8753	0.8852	0.9159	0.8507	0.8724	0.9293	0.9261	0.9457	0.9164	0.9365	0.949	0.9589	0.9466	0.9848	0.163
GO:0051247_positive_regulation_of_protein_metabolic_process	0.06111	0.02635	0.3771	0.7148	0.6713	0.8356	0.8772	0.8976	0.8547	0.773	0.833	0.7809	0.928	0.9155	0.8972	0.8251	0.823	0.8213	0.8392	0.9022	0.9166	0.9025	0.8989	0.8501	0.8995	0.9156	0.9356	0.8768	0.8985	0.9446	0.9374	0.9483	0.9181	0.9586	0.9518	0.9628	0.9165	0.9848	0.2185
GO:0051174_regulation_of_phosphorus_metabolic_process	0.00205	0.01227	0.2814	0.6167	0.573	0.8864	0.8175	0.8687	0.8006	0.7475	0.8609	0.7622	0.9168	0.9158	0.9267	0.833	0.8384	0.8081	0.8643	0.905	0.9185	0.9198	0.8956	0.8371	0.8857	0.9085	0.9369	0.9085	0.9062	0.9482	0.939	0.9618	0.9363	0.9636	0.9559	0.9675	0.958	0.9848	0.0929
GO:0019220_regulation_of_phosphate_metabolic_process	0.00205	0.01227	0.2814	0.6167	0.573	0.8864	0.8175	0.8687	0.8006	0.7475	0.8609	0.7622	0.9168	0.9158	0.9267	0.833	0.8384	0.8081	0.8643	0.905	0.9185	0.9198	0.8956	0.8371	0.8857	0.9085	0.9369	0.9085	0.9062	0.9482	0.939	0.9618	0.9363	0.9636	0.9559	0.9675	0.958	0.9848	0.0929
GO:0042325_regulation_of_phosphorylation	0.004022	0.007496	0.2885	0.6337	0.5562	0.8876	0.832	0.8871	0.819	0.7475	0.8643	0.7695	0.9207	0.9184	0.9267	0.8344	0.8452	0.8151	0.8647	0.905	0.919	0.9201	0.8985	0.8399	0.8911	0.9152	0.9369	0.909	0.9083	0.9482	0.939	0.962	0.9367	0.9636	0.9577	0.9679	0.958	0.9848	0.09581
GO:0043523_regulation_of_neuron_apoptosis	0.00244	0.1632	0.3943	0.1959	0.6216	0.6633	0.5455	0.6251	0.8063	0.6755	0.7415	0.7328	0.8698	0.7904	0.8636	0.7988	0.8053	0.7906	0.8392	0.8174	0.8757	0.9004	0.8503	0.8167	0.8829	0.8852	0.9269	0.846	0.8787	0.9315	0.9343	0.9457	0.9164	0.9548	0.9156	0.9589	0.9466	0.9848	0.0006022
GO:0042391_regulation_of_membrane_potential	0.002256	0.03393	0.3524	0.1202	0.6272	0.8282	0.6817	0.6681	0.7593	0.6203	0.7919	0.7178	0.7817	0.8579	0.7896	0.8075	0.823	0.7906	0.8495	0.8688	0.9112	0.9004	0.8779	0.8357	0.8857	0.8909	0.9159	0.8635	0.8975	0.9446	0.9374	0.9483	0.9165	0.9605	0.949	0.9628	0.9466	0.9848	0.002706
GO:0009968_negative_regulation_of_signal_transduction	4.072e-05	0.1653	0.127	0.1544	0.4827	0.8716	0.7103	0.7132	0.8709	0.6959	0.8134	0.7571	0.8721	0.8943	0.9161	0.8075	0.8287	0.7931	0.8392	0.9049	0.9097	0.9201	0.8502	0.8098	0.8857	0.9007	0.9184	0.8454	0.9062	0.9482	0.9374	0.9481	0.9165	0.9531	0.949	0.9591	0.9466	0.9848	0.007826
GO:0010648_negative_regulation_of_cell_communication	0.0002019	0.2005	0.4351	0.2931	0.3798	0.886	0.689	0.6647	0.8915	0.7852	0.8698	0.8446	0.8996	0.9066	0.9137	0.8547	0.8723	0.8515	0.8757	0.9146	0.9249	0.9402	0.8811	0.8522	0.9073	0.9191	0.9369	0.8898	0.9328	0.9537	0.939	0.9686	0.9393	0.9636	0.9492	0.9675	0.958	0.9848	0.01361
GO:0051338_regulation_of_transferase_activity	0.001224	0.08179	0.1785	0.3832	0.6821	0.8839	0.8708	0.8976	0.787	0.7134	0.833	0.7167	0.9176	0.9155	0.9267	0.8075	0.8287	0.7931	0.8499	0.9034	0.9082	0.9025	0.8917	0.8371	0.8857	0.8964	0.9369	0.8984	0.8845	0.9446	0.9374	0.9481	0.93	0.9605	0.9518	0.9591	0.9489	0.9848	0.22
GO:0045859_regulation_of_protein_kinase_activity	0.004828	0.05655	0.1903	0.3603	0.6821	0.886	0.8772	0.8976	0.7876	0.7049	0.833	0.7178	0.9275	0.9155	0.9267	0.8114	0.8367	0.8029	0.8446	0.9028	0.9097	0.9081	0.8985	0.8399	0.8857	0.8929	0.9369	0.9069	0.8916	0.9446	0.9374	0.9481	0.9363	0.9586	0.9498	0.9591	0.9489	0.9848	0.2257
GO:0043549_regulation_of_kinase_activity	0.00209	0.05133	0.1915	0.398	0.7042	0.8856	0.876	0.8976	0.7953	0.7276	0.844	0.7334	0.9284	0.9159	0.9267	0.8219	0.8369	0.8023	0.8508	0.9049	0.9097	0.9081	0.8985	0.8401	0.8857	0.9046	0.9369	0.9069	0.8877	0.9446	0.9374	0.9483	0.9361	0.9605	0.9518	0.9628	0.9489	0.9848	0.2076
GO:0007242_intracellular_signaling_pathway	4.072e-05	0.1337	0.1912	0.3032	0.5468	0.8146	0.8233	0.7962	0.791	0.7771	0.8692	0.8394	0.9116	0.895	0.9137	0.8728	0.8904	0.8691	0.8907	0.9046	0.9185	0.9377	0.8985	0.8757	0.9043	0.9251	0.9369	0.9154	0.9159	0.9482	0.9461	0.962	0.9434	0.9639	0.945	0.9679	0.963	0.9848	0.01604
GO:0050881_musculoskeletal_movement	0.2233	0.5474	0.2286	0.5467	0.04917	0.8353	0.8493	0.8976	0.8368	0.6405	0.7644	0.7459	0.9145	0.92	0.9267	0.8075	0.8053	0.7931	0.8392	0.8725	0.9185	0.907	0.8985	0.8435	0.9077	0.9156	0.9307	0.8635	0.9072	0.9327	0.9374	0.9481	0.93	0.9545	0.959	0.9628	0.9466	0.9848	0.1675
GO:0050879_multicellular_organismal_movement	0.2233	0.5474	0.2286	0.5467	0.04917	0.8353	0.8493	0.8976	0.8368	0.6405	0.7644	0.7459	0.9145	0.92	0.9267	0.8075	0.8053	0.7931	0.8392	0.8725	0.9185	0.907	0.8985	0.8435	0.9077	0.9156	0.9307	0.8635	0.9072	0.9327	0.9374	0.9481	0.93	0.9545	0.959	0.9628	0.9466	0.9848	0.1675
GO:0035196_production_of_miRNAs_involved_in_gene_silencing_by_miRNA	0.0248	0.5132	0.4434	0.6353	0.6711	0.733	0.55	0.5238	0.6562	0.5771	0.7427	0.6266	0.8232	0.8014	0.78	0.8034	0.8045	0.7969	0.8392	0.7977	0.8703	0.8326	0.8536	0.8467	0.8857	0.9152	0.9159	0.8635	0.8456	0.9096	0.6348	0.9287	0.9164	0.9298	0.8755	0.9514	0.9446	0.9848	0.1667
GO:0070918_production_of_small_RNA_involved_in_gene_silencing_by_RNA	0.0182	0.4219	0.3729	0.6979	0.6821	0.754	0.6447	0.6465	0.6855	0.6047	0.7442	0.6334	0.8645	0.8426	0.8565	0.8075	0.8045	0.7969	0.8392	0.7997	0.8774	0.8523	0.8786	0.8582	0.8939	0.9191	0.9159	0.8635	0.8453	0.9096	0.5665	0.9233	0.9029	0.9298	0.8959	0.9514	0.9166	0.9848	0.2026
GO:0031050_dsRNA_fragmentation	0.0182	0.4219	0.3729	0.6979	0.6821	0.754	0.6447	0.6465	0.6855	0.6047	0.7442	0.6334	0.8645	0.8426	0.8565	0.8075	0.8045	0.7969	0.8392	0.7997	0.8774	0.8523	0.8786	0.8582	0.8939	0.9191	0.9159	0.8635	0.8453	0.9096	0.5665	0.9233	0.9029	0.9298	0.8959	0.9514	0.9166	0.9848	0.2026
GO:0043331_response_to_dsRNA	0.008489	0.4448	0.384	0.8083	0.7134	0.8243	0.7362	0.5367	0.7751	0.6872	0.8001	0.6838	0.9077	0.8739	0.8056	0.8318	0.8065	0.8081	0.8392	0.829	0.9023	0.9004	0.9033	0.8666	0.901	0.9196	0.935	0.8962	0.8611	0.9152	0.8713	0.9457	0.9164	0.9298	0.8755	0.953	0.9446	0.9848	0.3353
GO:0006029_proteoglycan_metabolic_process	0.06234	0.01818	0.6274	0.7202	0.5089	0.7044	0.4029	0.5663	0.754	0.7069	0.8172	0.7812	0.7923	0.7578	0.6581	0.8096	0.8455	0.8081	0.8392	0.8616	0.8804	0.9004	0.8352	0.8157	0.8473	0.8446	0.9159	0.8635	0.8876	0.9315	0.929	0.9481	0.9278	0.9298	0.8868	0.9589	0.9485	0.9848	0.157
GO:0001568_blood_vessel_development	0.0007802	0.01621	0.5717	0.6008	0.6602	0.6894	0.5004	0.45	0.7361	0.803	0.8267	0.8514	0.8941	0.8435	0.7916	0.8075	0.8338	0.8029	0.8721	0.866	0.8955	0.9095	0.8549	0.8194	0.8894	0.8914	0.9381	0.8806	0.9062	0.9376	0.939	0.9728	0.935	0.9636	0.9345	0.9628	0.9568	0.9848	3.717e-05
GO:0001944_vasculature_development	0.000426	0.0267	0.5988	0.6329	0.6793	0.7131	0.528	0.5046	0.7612	0.8253	0.844	0.8726	0.9074	0.8649	0.8249	0.8251	0.8455	0.8375	0.8824	0.8732	0.9023	0.9212	0.8786	0.8401	0.8995	0.9085	0.9464	0.8984	0.9124	0.9446	0.9429	0.9785	0.9393	0.9667	0.945	0.9648	0.9607	0.9848	3.717e-05
GO:0035272_exocrine_system_development	0.2805	0.03216	0.7517	0.6514	0.5899	0.7076	0.6008	0.6461	0.7453	0.6971	0.7946	0.7178	0.7465	0.8583	0.78	0.7866	0.8053	0.7906	0.8392	0.8404	0.8682	0.8694	0.8207	0.7892	0.8483	0.8798	0.8863	0.8422	0.8786	0.9315	0.927	0.9481	0.9164	0.9298	0.9156	0.9514	0.9466	0.9848	0.03147
GO:0031016_pancreas_development	0.07869	0.03514	0.779	0.6658	0.5295	0.7133	0.5402	0.6091	0.7844	0.7384	0.7962	0.7599	0.7373	0.8612	0.8695	0.8034	0.8565	0.8102	0.8508	0.8655	0.9023	0.907	0.8207	0.8173	0.8857	0.9156	0.8742	0.8635	0.9083	0.9446	0.9261	0.9618	0.93	0.9468	0.9322	0.9591	0.958	0.9848	0.000492
GO:0009612_response_to_mechanical_stimulus	0.1253	0.0342	0.8304	0.5734	0.7218	0.6015	0.5617	0.6961	0.8316	0.7769	0.8634	0.8692	0.797	0.8547	0.7789	0.8388	0.8707	0.8595	0.8721	0.8905	0.9097	0.8785	0.8643	0.8357	0.8939	0.8852	0.9369	0.8918	0.9256	0.9482	0.9429	0.9785	0.9386	0.9605	0.9376	0.9628	0.9607	0.9848	0.07897
GO:0009719_response_to_endogenous_stimulus	0.01446	0.02218	0.8057	0.6404	0.6284	0.527	0.55	0.6461	0.7497	0.6882	0.7958	0.8299	0.8898	0.8402	0.8398	0.8494	0.8274	0.8662	0.8392	0.8647	0.9023	0.9064	0.9033	0.8663	0.8516	0.8738	0.8939	0.9155	0.9159	0.9331	0.9374	0.9647	0.9449	0.9511	0.9409	0.9591	0.9736	0.9848	0.004518
GO:0009725_response_to_hormone_stimulus	0.03848	0.04649	0.8533	0.7181	0.6687	0.6272	0.6652	0.709	0.7991	0.733	0.8267	0.8525	0.9129	0.8804	0.8695	0.8697	0.8669	0.8805	0.8643	0.9022	0.9187	0.9337	0.9127	0.8846	0.8857	0.8909	0.9307	0.927	0.9316	0.9468	0.939	0.9701	0.9616	0.9605	0.949	0.9628	0.9736	0.9848	0.005093
GO:0048675_axon_extension	0.008663	0.2405	0.7504	0.5413	0.7042	0.6421	0.6521	0.7479	0.7453	0.7296	0.794	0.7531	0.8293	0.8163	0.7765	0.8075	0.8308	0.8439	0.8392	0.8688	0.8872	0.8959	0.8534	0.8305	0.8608	0.8846	0.8863	0.8765	0.885	0.9315	0.9343	0.9483	0.9291	0.9503	0.9322	0.9514	0.958	0.9848	0.2364
GO:0021915_neural_tube_development	0.01182	0.1128	0.5963	0.5958	0.6389	0.6979	0.7689	0.8393	0.6782	0.6227	0.7836	0.6525	0.8194	0.8832	0.8405	0.8015	0.8274	0.7931	0.8411	0.8616	0.9023	0.9025	0.8517	0.8098	0.8857	0.9156	0.9092	0.8635	0.8787	0.9446	0.9343	0.9483	0.9166	0.9545	0.949	0.9591	0.9482	0.9848	0.01115
GO:0048009_insulin-like_growth_factor_receptor_signaling_pathway	0.003887	0.2307	0.5577	0.6208	0.7057	0.7018	0.7409	0.7862	0.7375	0.6872	0.7962	0.7111	0.8198	0.8679	0.9031	0.8011	0.8045	0.7679	0.8392	0.8695	0.8994	0.8811	0.8448	0.7892	0.8511	0.8714	0.8849	0.8406	0.885	0.9315	0.93	0.9457	0.9164	0.9298	0.9289	0.9514	0.9466	0.9848	0.06177
GO:0030178_negative_regulation_of_Wnt_receptor_signaling_pathway	0.03449	0.1502	0.6232	0.6334	0.686	0.7655	0.7472	0.8184	0.7751	0.6435	0.794	0.7383	0.8965	0.8748	0.9238	0.8344	0.816	0.7931	0.8392	0.8897	0.9023	0.9064	0.8865	0.8413	0.8857	0.9152	0.9159	0.8635	0.8845	0.9446	0.9374	0.9481	0.9191	0.9526	0.9399	0.9591	0.9466	0.9848	0.06491
GO:0048041_focal_adhesion_assembly	0.03038	0.3124	0.6456	0.699	0.6488	0.7043	0.8133	0.8607	0.7845	0.6959	0.7972	0.7599	0.8535	0.8129	0.9161	0.8075	0.8387	0.8029	0.8386	0.8539	0.9023	0.9004	0.8502	0.822	0.8516	0.858	0.9159	0.8635	0.9072	0.9035	0.9261	0.9483	0.9164	0.9338	0.699	0.943	0.9165	0.9848	0.1321
GO:0021988_olfactory_lobe_development	0.0148	0.2655	0.3875	0.7924	0.7142	0.7288	0.6738	0.8042	0.6756	0.7366	0.797	0.7178	0.8919	0.8739	0.8936	0.8075	0.8226	0.8054	0.8411	0.8667	0.9023	0.9201	0.8871	0.8487	0.8857	0.9068	0.9159	0.8918	0.8787	0.9315	0.9345	0.9457	0.9291	0.9545	0.9345	0.9589	0.9335	0.9848	0.1186
GO:0021772_olfactory_bulb_development	0.0148	0.2655	0.3875	0.7924	0.7142	0.7288	0.6738	0.8042	0.6756	0.7366	0.797	0.7178	0.8919	0.8739	0.8936	0.8075	0.8226	0.8054	0.8411	0.8667	0.9023	0.9201	0.8871	0.8487	0.8857	0.9068	0.9159	0.8918	0.8787	0.9315	0.9345	0.9457	0.9291	0.9545	0.9345	0.9589	0.9335	0.9848	0.1186
GO:0001945_lymph_vessel_development	0.005767	0.3804	0.4888	0.6658	0.6693	0.6334	0.7336	0.6925	0.7876	0.7276	0.7821	0.8314	0.8563	0.8418	0.7947	0.8075	0.8374	0.8163	0.8392	0.8426	0.8994	0.9081	0.8549	0.8405	0.8739	0.8852	0.9269	0.883	0.9072	0.9315	0.9374	0.9483	0.9361	0.9487	0.9243	0.9591	0.9575	0.9848	0.2019
GO:0001569_patterning_of_blood_vessels	0.002683	0.4588	0.5524	0.6252	0.676	0.6721	0.8041	0.8088	0.8117	0.7296	0.8126	0.7695	0.8793	0.9027	0.9018	0.8075	0.823	0.8029	0.8392	0.8695	0.9097	0.9085	0.8652	0.8371	0.8857	0.9046	0.9159	0.8635	0.9062	0.9345	0.9374	0.9483	0.927	0.9508	0.945	0.9591	0.9482	0.9848	0.05229
GO:0019218_regulation_of_steroid_metabolic_process	0.1014	0.005404	0.5865	0.7422	0.5609	0.7418	0.7843	0.7498	0.7358	0.6882	0.8169	0.7471	0.8991	0.8344	0.7989	0.7988	0.823	0.7931	0.8182	0.8231	0.8757	0.8677	0.8245	0.6242	0.8229	0.8256	0.9013	0.8429	0.8294	0.908	0.9215	0.9457	0.9164	0.9298	0.8976	0.9514	0.9466	0.9848	0.06769
GO:0050885_neuromuscular_process_controlling_balance	0.008261	0.1591	0.5943	0.7083	0.5398	0.7256	0.7652	0.6492	0.7729	0.7087	0.7962	0.7695	0.8965	0.8435	0.8042	0.8075	0.8378	0.8352	0.8392	0.8968	0.9035	0.8811	0.8549	0.8371	0.8829	0.8852	0.9159	0.8765	0.8963	0.9315	0.9374	0.9483	0.9367	0.9586	0.9351	0.9591	0.9529	0.9848	0.07517
GO:0001657_ureteric_bud_development	0.02837	0.08306	0.6707	0.7296	0.38	0.6949	0.708	0.6837	0.8504	0.7475	0.8172	0.8123	0.9028	0.8741	0.8249	0.8369	0.8707	0.8439	0.8643	0.8695	0.9082	0.8895	0.8957	0.8501	0.8857	0.9105	0.9356	0.8984	0.9062	0.9482	0.9374	0.9504	0.9367	0.9617	0.9236	0.9628	0.9489	0.9848	0.002195
GO:0051270_regulation_of_cellular_component_movement	4.072e-05	0.007254	0.5155	0.6616	0.497	0.654	0.7779	0.8583	0.7244	0.7551	0.8004	0.8001	0.9245	0.8892	0.9193	0.8281	0.8384	0.8335	0.8541	0.87	0.8999	0.9004	0.8786	0.8603	0.8911	0.9144	0.9369	0.8984	0.9062	0.9421	0.9374	0.9647	0.9291	0.9605	0.949	0.9591	0.9533	0.9848	3.717e-05
GO:0007044_cell-substrate_junction_assembly	0.01619	0.1186	0.6925	0.7225	0.6528	0.6849	0.8053	0.8607	0.7517	0.5698	0.7659	0.7178	0.8815	0.8317	0.7768	0.8075	0.823	0.8029	0.8185	0.8174	0.9023	0.9004	0.8549	0.8167	0.8511	0.8352	0.8939	0.8635	0.9062	0.8959	0.9252	0.9481	0.9164	0.9298	0.945	0.8251	0.9165	0.9848	0.05772
GO:0034330_cell_junction_organization	0.01757	0.1187	0.5254	0.7271	0.5613	0.8517	0.8233	0.8964	0.8281	0.5967	0.7715	0.7478	0.9118	0.9018	0.867	0.8075	0.8053	0.7906	0.8392	0.8688	0.9169	0.9214	0.8957	0.8399	0.9032	0.9046	0.9336	0.8635	0.885	0.9247	0.9345	0.9457	0.9165	0.9399	0.9579	0.8887	0.9165	0.9848	0.05648
GO:0001838_embryonic_epithelial_tube_formation	0.0248	0.1803	0.4996	0.71	0.6821	0.7991	0.8529	0.8976	0.6756	0.6835	0.8301	0.6838	0.9026	0.9081	0.9161	0.8238	0.8384	0.8029	0.8495	0.8732	0.9041	0.9106	0.8985	0.8432	0.8857	0.9152	0.9307	0.8783	0.8724	0.9468	0.9374	0.9481	0.9291	0.957	0.9518	0.9591	0.9466	0.9848	0.2392
GO:0060562_epithelial_tube_morphogenesis	0.005612	0.05312	0.6106	0.7637	0.6859	0.8392	0.8693	0.8976	0.7521	0.7422	0.8595	0.7416	0.9168	0.9135	0.9018	0.8494	0.8707	0.8447	0.8643	0.8982	0.919	0.9004	0.9037	0.8601	0.8954	0.9191	0.9369	0.8998	0.885	0.95	0.9382	0.9504	0.9386	0.9636	0.9518	0.9628	0.9482	0.9848	0.0918
GO:0016331_morphogenesis_of_embryonic_epithelium	0.002853	0.1143	0.652	0.7148	0.7347	0.8224	0.8877	0.8976	0.7517	0.7149	0.8637	0.7037	0.9314	0.925	0.9267	0.8649	0.8735	0.8507	0.8659	0.9022	0.9229	0.9268	0.91	0.8753	0.9073	0.9334	0.9356	0.9069	0.9062	0.9487	0.9374	0.9504	0.9393	0.9625	0.959	0.9628	0.9575	0.9848	0.1842
GO:0032318_regulation_of_Ras_GTPase_activity	0.01102	0.1765	0.3423	0.7826	0.3485	0.7288	0.7414	0.6945	0.8107	0.779	0.844	0.8317	0.9144	0.895	0.7896	0.8483	0.8482	0.8439	0.8557	0.8725	0.9132	0.9212	0.8824	0.8663	0.8882	0.9156	0.9356	0.8984	0.9124	0.9327	0.9374	0.9504	0.9291	0.9605	0.9197	0.9628	0.9466	0.9848	0.1839
GO:0007178_transmembrane_receptor_protein_serine/threonine_kinase_signaling_pathway	4.072e-05	0.3192	0.3971	0.7148	0.3544	0.7264	0.7591	0.7217	0.8447	0.7445	0.8698	0.7921	0.9168	0.8894	0.9161	0.8801	0.8919	0.8805	0.8793	0.905	0.9249	0.9467	0.9052	0.8846	0.8857	0.9107	0.9369	0.9248	0.9371	0.9522	0.9429	0.9729	0.964	0.9636	0.9492	0.9679	0.9736	0.9848	0.01669
GO:0046661_male_sex_differentiation	0.04297	0.2379	0.6203	0.7398	0.3264	0.7735	0.542	0.4986	0.8277	0.7475	0.8715	0.8394	0.9144	0.8679	0.6581	0.8728	0.8926	0.8919	0.8824	0.9022	0.9249	0.9184	0.9052	0.8999	0.9093	0.9222	0.9369	0.9283	0.9371	0.95	0.939	0.9701	0.9584	0.9636	0.9253	0.9748	0.9736	0.9848	0.0002708
GO:0046546_development_of_primary_male_sexual_characteristics	0.03497	0.4304	0.6673	0.7411	0.1915	0.8414	0.6298	0.5664	0.8453	0.7813	0.8777	0.849	0.9168	0.8748	0.6865	0.8815	0.8983	0.8976	0.8849	0.9049	0.9275	0.9364	0.9052	0.9028	0.9138	0.9282	0.9369	0.9317	0.9371	0.9523	0.9429	0.9705	0.9585	0.9639	0.9341	0.9755	0.9736	0.9848	0.001396
GO:0003006_reproductive_developmental_process	0.02165	0.1765	0.6116	0.8004	0.5995	0.8423	0.5692	0.3712	0.8833	0.8324	0.9	0.8937	0.9314	0.8894	0.5988	0.8875	0.9206	0.91	0.9108	0.9158	0.9414	0.9402	0.9127	0.9116	0.9192	0.9334	0.9451	0.9423	0.9534	0.9669	0.9603	0.986	0.9686	0.9767	0.9449	0.9755	0.9736	0.9848	0.0005336
GO:0008344_adult_locomotory_behavior	0.04439	0.2762	0.6965	0.2931	0.5724	0.8146	0.6058	0.816	0.8024	0.7759	0.8579	0.8478	0.856	0.8892	0.8236	0.8369	0.8664	0.8551	0.8689	0.9022	0.9097	0.9025	0.8786	0.8305	0.8857	0.8914	0.9333	0.8783	0.9083	0.9482	0.9374	0.9701	0.9291	0.957	0.9156	0.9591	0.958	0.9848	0.03954
GO:0050804_regulation_of_synaptic_transmission	0.03568	0.05752	0.8112	0.6404	0.6281	0.7987	0.6501	0.7555	0.8117	0.7475	0.812	0.8514	0.887	0.8792	0.9238	0.8114	0.8338	0.8458	0.8551	0.8725	0.9112	0.9085	0.8949	0.8399	0.8799	0.8713	0.9269	0.8961	0.9159	0.9446	0.9374	0.9701	0.9393	0.9586	0.9559	0.9648	0.9625	0.9848	0.00128
GO:0040012_regulation_of_locomotion	0.01223	0.05204	0.8186	0.7271	0.5768	0.704	0.8233	0.8268	0.747	0.8012	0.849	0.824	0.9314	0.9135	0.9018	0.8494	0.8707	0.8496	0.8768	0.8943	0.9023	0.9027	0.9033	0.8663	0.8954	0.9191	0.9369	0.9094	0.9159	0.9446	0.9374	0.9701	0.9367	0.9605	0.9492	0.9628	0.959	0.9848	3.717e-05
GO:0051271_negative_regulation_of_cellular_component_movement	0.0148	0.05326	0.6898	0.5289	0.4413	0.8406	0.8392	0.8849	0.8012	0.8053	0.8698	0.8447	0.9275	0.9144	0.9267	0.8621	0.8635	0.8662	0.8835	0.9046	0.9132	0.9106	0.9033	0.8716	0.9001	0.9191	0.9369	0.9186	0.9201	0.9482	0.9429	0.972	0.9421	0.9636	0.9518	0.9648	0.9529	0.9848	0.01349
GO:0030334_regulation_of_cell_migration	7.319e-05	0.03088	0.6574	0.6397	0.5099	0.7888	0.8715	0.8972	0.8166	0.8158	0.8579	0.8489	0.9321	0.9252	0.9267	0.8649	0.8707	0.8564	0.8832	0.9049	0.919	0.9268	0.9093	0.8868	0.9132	0.926	0.9469	0.9154	0.9234	0.9482	0.9429	0.9701	0.9421	0.9682	0.9596	0.9693	0.963	0.9848	3.717e-05
GO:0030336_negative_regulation_of_cell_migration	0.004975	0.06444	0.7594	0.4395	0.5398	0.8864	0.8654	0.8784	0.8517	0.8398	0.8905	0.866	0.9321	0.9279	0.9267	0.8804	0.8889	0.8855	0.9004	0.9146	0.9275	0.9378	0.9127	0.8885	0.9214	0.9369	0.9477	0.9308	0.9371	0.9537	0.9603	0.9848	0.9572	0.9745	0.9606	0.9755	0.9402	0.9848	0.002995
GO:0070887_cellular_response_to_chemical_stimulus	0.001224	0.3028	0.6402	0.7052	0.7307	0.7018	0.6403	0.6756	0.8281	0.7588	0.8538	0.8478	0.8565	0.8649	0.8803	0.8424	0.8578	0.8439	0.8824	0.8968	0.9112	0.9228	0.8861	0.8371	0.8939	0.9156	0.9226	0.8856	0.9187	0.9352	0.9374	0.9504	0.9278	0.9511	0.8968	0.9628	0.957	0.9848	0.1396
GO:0009987_cellular_process	0.01211	0.3996	0.7784	0.7541	0.7503	0.7461	0.5098	0.6942	0.8277	0.785	0.8715	0.8607	0.8721	0.8359	0.78	0.8621	0.8926	0.882	0.8835	0.9022	0.9249	0.9238	0.8786	0.8663	0.8939	0.9191	0.9369	0.909	0.9371	0.9482	0.9429	0.986	0.9441	0.9639	0.9253	0.9675	0.9736	0.9848	0.03103
GO:0048514_blood_vessel_morphogenesis	0.002256	0.144	0.5884	0.7629	0.7274	0.8629	0.8123	0.6206	0.839	0.8667	0.8905	0.8959	0.9318	0.9135	0.8999	0.8649	0.8897	0.8674	0.9046	0.905	0.9221	0.9391	0.9052	0.8821	0.9284	0.9336	0.9588	0.9235	0.9327	0.9503	0.9609	0.986	0.9496	0.9767	0.9496	0.9755	0.9701	0.9848	0.001023
GO:0006024_glycosaminoglycan_biosynthetic_process	0.04711	0.2764	0.7258	0.7629	0.789	0.8839	0.8708	0.8916	0.8596	0.8053	0.8715	0.8462	0.9148	0.8881	0.9235	0.8632	0.8759	0.8662	0.8697	0.9049	0.9185	0.9467	0.8957	0.8662	0.8939	0.8983	0.9336	0.9079	0.9159	0.9482	0.9374	0.962	0.9421	0.9605	0.949	0.9628	0.9595	0.9848	0.4041
GO:0006023_aminoglycan_biosynthetic_process	0.02311	0.2544	0.7034	0.7503	0.8021	0.8846	0.8772	0.8976	0.8795	0.8206	0.8777	0.849	0.9265	0.907	0.9265	0.8667	0.8889	0.8686	0.8808	0.905	0.9206	0.9538	0.9033	0.8753	0.9032	0.9156	0.9369	0.9109	0.9234	0.9503	0.939	0.9661	0.9463	0.9636	0.9492	0.9679	0.963	0.9848	0.4527
GO:0043434_response_to_peptide_hormone_stimulus	0.02448	0.344	0.7259	0.8329	0.7528	0.8224	0.8477	0.8139	0.8277	0.779	0.8711	0.8465	0.9305	0.9031	0.9161	0.8728	0.8908	0.8962	0.8824	0.9049	0.9221	0.9229	0.9093	0.8868	0.9073	0.9212	0.9369	0.9272	0.9406	0.9484	0.9429	0.9729	0.9496	0.9681	0.949	0.9679	0.9736	0.9848	0.1486
GO:0001525_angiogenesis	0.006402	0.4644	0.6761	0.7959	0.7976	0.8846	0.8396	0.7824	0.8693	0.8725	0.9002	0.9	0.9321	0.9249	0.9205	0.8841	0.899	0.8858	0.9108	0.9215	0.9456	0.9525	0.9204	0.9028	0.9334	0.9461	0.9588	0.9385	0.9458	0.9547	0.9679	0.986	0.964	0.9767	0.959	0.9755	0.9736	0.9848	0.02305
GO:0030512_negative_regulation_of_transforming_growth_factor_beta_receptor_signaling_pathway	0.0004891	0.6346	0.4744	0.5597	0.2939	0.8296	0.8312	0.7442	0.8419	0.7697	0.844	0.8314	0.9169	0.8739	0.8171	0.8481	0.8837	0.8541	0.8643	0.9022	0.919	0.9402	0.8985	0.8719	0.9068	0.9197	0.9369	0.8954	0.9201	0.9482	0.9374	0.9483	0.9291	0.9605	0.9202	0.964	0.9482	0.9848	0.2965
GO:0050905_neuromuscular_process	0.0163	0.3517	0.7157	0.6381	0.4149	0.8192	0.7275	0.7338	0.8174	0.763	0.8346	0.8446	0.9116	0.8804	0.8605	0.8494	0.8625	0.8628	0.8647	0.9022	0.9129	0.9004	0.8917	0.8662	0.8857	0.9052	0.9369	0.9069	0.9191	0.9458	0.9374	0.9701	0.9408	0.9622	0.949	0.964	0.963	0.9848	0.04312
GO:0051272_positive_regulation_of_cellular_component_movement	0.005587	0.2965	0.5223	0.7148	0.4581	0.7643	0.8772	0.8976	0.7909	0.803	0.8267	0.8147	0.9321	0.9173	0.9238	0.8554	0.8423	0.8504	0.8655	0.8887	0.9099	0.9081	0.9053	0.8846	0.9155	0.926	0.9429	0.9079	0.9058	0.9331	0.9374	0.9483	0.9291	0.9622	0.945	0.9628	0.9482	0.9848	0.03884
GO:0030335_positive_regulation_of_cell_migration	0.02174	0.3737	0.6465	0.7442	0.4909	0.7928	0.8855	0.8976	0.8319	0.8331	0.8579	0.8478	0.9321	0.9252	0.9238	0.8667	0.8641	0.8641	0.8824	0.9046	0.919	0.9212	0.9187	0.8944	0.9236	0.9348	0.9484	0.9154	0.9106	0.9446	0.9374	0.9549	0.9361	0.9639	0.9492	0.964	0.9489	0.9848	0.06557
GO:0045685_regulation_of_glial_cell_differentiation	0.03454	0.3367	0.6593	0.7968	0.3264	0.8236	0.8579	0.8934	0.8677	0.7683	0.844	0.842	0.9148	0.9155	0.9238	0.8424	0.8707	0.8375	0.8516	0.9049	0.919	0.9374	0.8786	0.8399	0.9055	0.9152	0.9369	0.8803	0.9062	0.9482	0.9379	0.9504	0.9367	0.9636	0.9518	0.9628	0.9476	0.9848	0.262
GO:0014013_regulation_of_gliogenesis	0.02736	0.4418	0.6574	0.7924	0.4088	0.8414	0.8611	0.8958	0.8596	0.7998	0.8692	0.8489	0.9207	0.9182	0.9238	0.8494	0.8888	0.8484	0.868	0.905	0.919	0.9364	0.8786	0.8467	0.9097	0.9191	0.9369	0.8948	0.9159	0.9482	0.939	0.9659	0.9386	0.9709	0.9518	0.9628	0.9489	0.9848	0.2977
GO:0002053_positive_regulation_of_mesenchymal_cell_proliferation	0.0373	0.4235	0.7514	0.7826	0.144	0.7832	0.7866	0.8403	0.8798	0.7921	0.8692	0.8396	0.9318	0.8832	0.9031	0.8649	0.8865	0.8674	0.8824	0.8971	0.9161	0.9112	0.9052	0.8966	0.8939	0.9191	0.9317	0.9212	0.9204	0.9482	0.9374	0.9701	0.9441	0.9636	0.9374	0.9679	0.958	0.9848	0.06466
GO:0010464_regulation_of_mesenchymal_cell_proliferation	0.04641	0.5384	0.8302	0.8131	0.2619	0.7931	0.7863	0.8492	0.8709	0.8116	0.8715	0.846	0.9318	0.8811	0.9031	0.8721	0.8903	0.8751	0.8824	0.8971	0.9185	0.907	0.9078	0.9071	0.9068	0.9226	0.9356	0.9255	0.9234	0.9482	0.939	0.9701	0.9478	0.9639	0.936	0.9693	0.959	0.9848	0.05741
GO:0021532_neural_tube_patterning	0.04928	0.4697	0.8079	0.7448	0.4659	0.8864	0.8715	0.8624	0.901	0.8354	0.8827	0.8787	0.9182	0.9279	0.9155	0.8649	0.8926	0.8674	0.9058	0.9146	0.9369	0.9391	0.9052	0.8757	0.932	0.9462	0.9369	0.9121	0.9445	0.958	0.9584	0.986	0.9496	0.9742	0.9587	0.9755	0.9736	0.9848	0.04258
GO:0051234_establishment_of_localization	0.003606	0.3949	0.8487	0.7684	0.4088	0.9062	0.8357	0.8976	0.8899	0.8547	0.8983	0.8799	0.9314	0.9279	0.8909	0.881	0.8893	0.8858	0.9014	0.917	0.954	0.9544	0.9216	0.8917	0.9284	0.9379	0.9482	0.9248	0.9532	0.9537	0.9636	0.986	0.964	0.9765	0.9628	0.9755	0.9165	0.9848	0.1485
GO:0006810_transport	0.004215	0.4126	0.8552	0.7826	0.4444	0.9062	0.8392	0.8972	0.8866	0.8557	0.8997	0.8799	0.9314	0.9279	0.883	0.8836	0.8912	0.8892	0.9038	0.917	0.954	0.9543	0.9208	0.893	0.9296	0.9396	0.9493	0.926	0.9532	0.9537	0.9653	0.986	0.964	0.9767	0.9628	0.9755	0.906	0.9848	0.1444
GO:0008213_protein_amino_acid_alkylation	0.03669	0.8215	0.4362	0.7225	0.5548	0.5556	0.8365	0.7338	0.4661	0.5326	0.6081	0.6525	0.8528	0.8042	0.78	0.7554	0.6904	0.759	0.7378	0.7235	0.8065	0.8127	0.8348	0.7892	0.7659	0.8096	0.7748	0.8422	0.8279	0.8301	0.8862	0.8962	0.8982	0.9015	0.847	0.8286	0.7353	0.9848	0.6262
GO:0006479_protein_amino_acid_methylation	0.03669	0.8215	0.4362	0.7225	0.5548	0.5556	0.8365	0.7338	0.4661	0.5326	0.6081	0.6525	0.8528	0.8042	0.78	0.7554	0.6904	0.759	0.7378	0.7235	0.8065	0.8127	0.8348	0.7892	0.7659	0.8096	0.7748	0.8422	0.8279	0.8301	0.8862	0.8962	0.8982	0.9015	0.847	0.8286	0.7353	0.9848	0.6262
GO:0043414_macromolecule_methylation	0.01198	0.5639	0.3675	0.6404	0.6284	0.5269	0.7427	0.7135	0.5969	0.5718	0.6531	0.6805	0.8502	0.7775	0.7367	0.7554	0.7168	0.745	0.7498	0.7696	0.8378	0.833	0.8207	0.7892	0.7746	0.8034	0.8507	0.8381	0.8415	0.8431	0.9005	0.8962	0.8982	0.9052	0.8724	0.8914	0.7028	0.9848	0.5027
GO:0032259_methylation	0.02467	0.6095	0.418	0.6821	0.6485	0.6349	0.829	0.8145	0.63	0.6139	0.6531	0.6843	0.8875	0.8401	0.7916	0.754	0.71	0.7221	0.7383	0.7599	0.8402	0.8512	0.8245	0.7892	0.7845	0.8096	0.8623	0.8381	0.8158	0.8353	0.8868	0.8919	0.8982	0.8885	0.8959	0.8914	0.7533	0.9848	0.6106
GO:0051276_chromosome_organization	0.008559	0.8215	0.3286	0.7064	0.6236	0.704	0.8611	0.8958	0.7377	0.5723	0.6252	0.7111	0.8045	0.8016	0.8557	0.7807	0.7469	0.759	0.7979	0.7856	0.8682	0.8688	0.8371	0.8246	0.8483	0.8852	0.8849	0.8454	0.8456	0.8959	0.9062	0.9233	0.905	0.9261	0.5485	0.5032	0.7533	0.9848	0.7017
GO:0006325_chromatin_organization	0.001554	0.8215	0.3019	0.5641	0.6873	0.7051	0.8715	0.8873	0.747	0.6855	0.7427	0.7617	0.846	0.8129	0.8076	0.8027	0.8045	0.7931	0.8392	0.8164	0.8757	0.8811	0.8494	0.8405	0.8562	0.8852	0.8939	0.875	0.8616	0.9209	0.9163	0.9457	0.9164	0.9298	0.5836	0.4724	0.7734	0.9848	0.6425
GO:0051246_regulation_of_protein_metabolic_process	0.0007802	0.146	0.2472	0.4262	0.581	0.8276	0.8233	0.8737	0.8	0.6839	0.7427	0.68	0.8931	0.9135	0.9261	0.7941	0.7717	0.7675	0.7971	0.8707	0.9023	0.9004	0.8757	0.8	0.8682	0.8852	0.9092	0.8381	0.8611	0.9293	0.9261	0.9457	0.9029	0.9348	0.9559	0.7289	0.4063	0.9848	0.03127
GO:0032268_regulation_of_cellular_protein_metabolic_process	0.00996	0.1287	0.3262	0.6133	0.5752	0.8146	0.8245	0.8884	0.791	0.6651	0.7427	0.6624	0.8903	0.9144	0.9267	0.795	0.7596	0.7832	0.7909	0.8688	0.9021	0.8895	0.8675	0.8058	0.8516	0.8846	0.8901	0.8381	0.8611	0.9247	0.9215	0.9457	0.905	0.9298	0.9518	0.7811	0.5492	0.9848	0.03494
GO:0016311_dephosphorylation	0.004114	0.3314	0.4122	0.699	0.6769	0.733	0.8772	0.8607	0.7751	0.6612	0.797	0.6857	0.9116	0.8889	0.9237	0.8024	0.8045	0.8029	0.8392	0.8426	0.8994	0.8535	0.8757	0.8108	0.8857	0.8909	0.8742	0.8662	0.8786	0.9315	0.9287	0.9337	0.9164	0.9503	0.9108	0.5922	0.5716	0.9848	0.1729
GO:0090003_regulation_of_establishment_of_protein_localization_in_plasma_membrane	0.01211	0.7264	0.07431	0.5412	0.6059	0.8296	0.8233	0.8976	0.8604	0.6584	0.7361	0.7571	0.8391	0.8435	0.9261	0.7856	0.7386	0.7848	0.7971	0.8164	0.8753	0.9004	0.8503	0.5755	0.8516	0.8756	0.8849	0.8381	0.8764	0.8959	0.9141	0.8962	0.9029	0.9286	0.9194	0.9122	0.6937	0.9848	0.4769
GO:0006468_protein_amino_acid_phosphorylation	4.072e-05	0.275	0.01407	0.6381	0.7455	0.7849	0.8392	0.8976	0.7876	0.724	0.8264	0.7555	0.9318	0.9181	0.9267	0.8494	0.8384	0.8335	0.8428	0.881	0.9185	0.9064	0.9052	0.8868	0.9132	0.9222	0.9369	0.8976	0.8958	0.9315	0.9379	0.9457	0.9291	0.9605	0.959	0.9628	0.9466	0.9848	0.1446
GO:0046626_regulation_of_insulin_receptor_signaling_pathway	0.001778	0.3133	0.02821	0.5044	0.5613	0.8385	0.8693	0.8976	0.8879	0.7475	0.8172	0.7836	0.9192	0.9173	0.8897	0.8481	0.8428	0.8451	0.8523	0.905	0.9276	0.9081	0.9033	0.8753	0.901	0.9148	0.9159	0.8791	0.9083	0.9482	0.939	0.9504	0.9361	0.9636	0.9596	0.965	0.9466	0.9848	0.3094
GO:0046627_negative_regulation_of_insulin_receptor_signaling_pathway	0.002203	0.3579	0.1915	0.6665	0.5525	0.8428	0.854	0.8976	0.8796	0.7759	0.8595	0.8191	0.9024	0.9144	0.9018	0.8424	0.8707	0.8458	0.8721	0.9054	0.9249	0.9064	0.8793	0.8593	0.9001	0.9107	0.9269	0.875	0.9181	0.9537	0.939	0.9659	0.9291	0.9639	0.9559	0.964	0.9482	0.9848	0.4226
GO:0006796_phosphate_metabolic_process	4.072e-05	0.4471	0.02821	0.6598	0.7844	0.8332	0.8911	0.8976	0.8117	0.7477	0.8698	0.7543	0.9321	0.9276	0.9267	0.8625	0.8609	0.8512	0.8551	0.9049	0.9251	0.9095	0.9127	0.893	0.9236	0.9323	0.9369	0.9069	0.9083	0.9446	0.941	0.9457	0.9367	0.9636	0.9606	0.8907	0.9482	0.9848	0.3022
GO:0006793_phosphorus_metabolic_process	4.072e-05	0.4471	0.02821	0.6598	0.7844	0.8332	0.8911	0.8976	0.8117	0.7477	0.8698	0.7543	0.9321	0.9276	0.9267	0.8625	0.8609	0.8512	0.8551	0.9049	0.9251	0.9095	0.9127	0.893	0.9236	0.9323	0.9369	0.9069	0.9083	0.9446	0.941	0.9457	0.9367	0.9636	0.9606	0.8907	0.9482	0.9848	0.3022
GO:0016310_phosphorylation	7.319e-05	0.5448	0.114	0.7083	0.8094	0.8421	0.8768	0.8976	0.8299	0.7998	0.8715	0.7905	0.9321	0.9245	0.9267	0.8649	0.8716	0.8564	0.8659	0.9049	0.9249	0.9206	0.9082	0.8948	0.9214	0.9313	0.9424	0.9069	0.9083	0.9446	0.939	0.9483	0.9367	0.9636	0.9587	0.9628	0.9482	0.9848	0.4869
GO:0051329_interphase_of_mitotic_cell_cycle	0.009639	0.3996	0.3946	0.3814	0.4602	0.8296	0.8393	0.8772	0.7368	0.7238	0.8304	0.7141	0.8919	0.8716	0.8411	0.8015	0.8069	0.7906	0.8392	0.8683	0.881	0.9004	0.8413	0.7892	0.7694	0.8611	0.8744	0.8635	0.8787	0.9315	0.9343	0.9483	0.9164	0.9286	0.9335	0.9589	0.9482	0.9848	0.2807
GO:0051325_interphase	0.01738	0.4532	0.5101	0.4829	0.4341	0.8504	0.8357	0.8794	0.7485	0.7448	0.8468	0.7203	0.905	0.8762	0.8402	0.8075	0.8273	0.8029	0.8392	0.8725	0.9023	0.9081	0.8549	0.8157	0.7859	0.8832	0.8984	0.8702	0.8876	0.9333	0.9374	0.9504	0.9165	0.9298	0.9374	0.9591	0.9489	0.9848	0.2765
GO:0051726_regulation_of_cell_cycle	4.072e-05	0.6075	0.2574	0.398	0.5089	0.8856	0.8266	0.8976	0.8596	0.6882	0.8169	0.7255	0.8857	0.8889	0.9267	0.8075	0.8215	0.8029	0.8392	0.8426	0.8984	0.9106	0.8786	0.8432	0.8516	0.9026	0.9307	0.8765	0.8787	0.9345	0.9252	0.9277	0.9164	0.9298	0.9324	0.953	0.9466	0.9848	0.387
GO:0048339_paraxial_mesoderm_development	0.03454	0.571	0.2814	0.4373	0.4088	0.8406	0.8772	0.8295	0.881	0.7402	0.833	0.8302	0.9318	0.925	0.9161	0.872	0.8707	0.8662	0.8721	0.9049	0.931	0.9429	0.911	0.6878	0.9247	0.9384	0.9369	0.9213	0.9083	0.9468	0.939	0.9481	0.9386	0.9605	0.9512	0.9679	0.9489	0.9848	0.3947
GO:0045786_negative_regulation_of_cell_cycle	0.0009422	0.5682	0.3729	0.2221	0.7543	0.8276	0.7725	0.8353	0.8026	0.7759	0.8692	0.8514	0.8293	0.8359	0.9267	0.8521	0.8707	0.8669	0.8793	0.8725	0.9023	0.9201	0.8786	0.8729	0.8889	0.9191	0.9369	0.9069	0.9083	0.9446	0.9374	0.9677	0.9386	0.957	0.9202	0.9591	0.963	0.9848	0.2986
GO:0035023_regulation_of_Rho_protein_signal_transduction	0.03707	0.4392	0.184	0.4311	0.582	0.8463	0.8715	0.8849	0.8538	0.8203	0.8637	0.8595	0.9237	0.8894	0.9138	0.8779	0.8759	0.8855	0.8768	0.905	0.9185	0.9391	0.8985	0.8898	0.903	0.9191	0.9356	0.909	0.9138	0.9482	0.9374	0.9504	0.9435	0.9622	0.945	0.9628	0.9165	0.9848	0.258
GO:0017015_regulation_of_transforming_growth_factor_beta_receptor_signaling_pathway	4.072e-05	0.567	0.1879	0.3282	0.7346	0.8815	0.8911	0.8217	0.88	0.7475	0.8715	0.7809	0.9321	0.925	0.9031	0.8728	0.8759	0.8698	0.8835	0.9095	0.9392	0.9485	0.9321	0.9089	0.9279	0.9444	0.9477	0.9267	0.9334	0.9503	0.9544	0.9483	0.9496	0.9742	0.9513	0.9755	0.957	0.9848	0.1145
GO:0046325_negative_regulation_of_glucose_import	0.006958	0.4071	0.3259	0.6469	0.727	0.8282	0.8467	0.827	0.8	0.7642	0.833	0.7695	0.9074	0.8894	0.8934	0.8075	0.8519	0.8081	0.8508	0.9022	0.9035	0.9004	0.8786	0.8415	0.8857	0.8974	0.9285	0.8671	0.8876	0.9446	0.9374	0.9483	0.9165	0.9573	0.945	0.9591	0.9466	0.9848	0.2626
GO:0045176_apical_protein_localization	0.02208	0.3167	0.3286	0.5957	0.6726	0.8682	0.8235	0.8976	0.8538	0.7366	0.8267	0.7571	0.9067	0.895	0.899	0.8597	0.8367	0.8168	0.8392	0.9022	0.9185	0.9081	0.8985	0.8757	0.8978	0.9052	0.9356	0.8731	0.9089	0.9352	0.9374	0.9483	0.9361	0.9462	0.9498	0.9591	0.9466	0.9848	0.1236
GO:0043467_regulation_of_generation_of_precursor_metabolites_and_energy	0.01144	0.3567	0.5569	0.7231	0.6821	0.8233	0.854	0.8976	0.7965	0.6921	0.8172	0.7178	0.9212	0.9135	0.9267	0.8453	0.8257	0.8439	0.8535	0.8776	0.9097	0.9025	0.9037	0.8663	0.8914	0.9085	0.9356	0.9069	0.9072	0.9482	0.9378	0.9481	0.9455	0.9605	0.9605	0.9628	0.958	0.9848	0.05014
GO:0006470_protein_amino_acid_dephosphorylation	0.003573	0.3586	0.5671	0.7148	0.7662	0.8332	0.8824	0.8628	0.8596	0.763	0.8695	0.7844	0.9317	0.92	0.9249	0.8557	0.856	0.8662	0.8721	0.9018	0.9206	0.9151	0.9052	0.8719	0.9132	0.9265	0.9333	0.913	0.9159	0.9482	0.939	0.9483	0.9367	0.9636	0.9498	0.8991	0.7533	0.9848	0.1805
GO:0034199_activation_of_protein_kinase_A_activity	0.007322	0.5037	0.4934	0.552	0.7718	0.8428	0.8606	0.8824	0.8624	0.8209	0.8828	0.8799	0.928	0.92	0.9261	0.8649	0.8889	0.8859	0.8835	0.9049	0.9221	0.9405	0.9086	0.8831	0.9097	0.9191	0.9369	0.9204	0.9371	0.9482	0.9461	0.9701	0.9496	0.961	0.9511	0.9675	0.9705	0.9848	0.5744
GO:0009791_post-embryonic_development	0.00274	0.517	0.5485	0.5044	0.7599	0.8785	0.8715	0.8976	0.8677	0.7829	0.8702	0.8514	0.9314	0.925	0.9034	0.8649	0.8716	0.8564	0.8835	0.914	0.9371	0.9228	0.9315	0.9041	0.9284	0.9196	0.9516	0.9213	0.9328	0.9484	0.9618	0.9682	0.9572	0.9656	0.9606	0.9718	0.9609	0.9848	0.1182
GO:0045737_positive_regulation_of_cyclin-dependent_protein_kinase_activity	0.04387	0.4748	0.538	0.514	0.7016	0.8877	0.8729	0.8976	0.8677	0.8397	0.8905	0.8702	0.9314	0.9159	0.9261	0.8739	0.8759	0.8803	0.8824	0.9146	0.9221	0.9394	0.9052	0.8878	0.9073	0.9191	0.9441	0.9152	0.9435	0.9555	0.9464	0.9729	0.9556	0.9681	0.959	0.9679	0.9736	0.9848	0.3925
GO:0006915_apoptosis	0.004012	0.4923	0.2962	0.5186	0.8357	0.7244	0.8773	0.8976	0.9032	0.8158	0.8905	0.8726	0.9321	0.934	0.7896	0.8878	0.8983	0.8978	0.8935	0.9319	0.9557	0.9576	0.8831	0.9172	0.9324	0.7572	0.9471	0.9341	0.9431	0.9588	0.9679	0.9701	0.9194	0.9722	0.9606	0.7033	0.4524	0.8698	0.1145
GO:0012501_programmed_cell_death	0.002015	0.4766	0.2893	0.5044	0.8357	0.7363	0.8788	0.8976	0.9032	0.8178	0.8905	0.8726	0.9321	0.934	0.7896	0.8878	0.8983	0.8978	0.8913	0.9319	0.9557	0.9569	0.9122	0.9178	0.93	0.7752	0.9471	0.9323	0.9431	0.9572	0.9679	0.9701	0.9603	0.9724	0.9606	0.7033	0.5338	0.9448	0.1145
GO:0051641_cellular_localization	0.0004741	0.7448	0.4679	0.6363	0.7715	0.7136	0.8911	0.8976	0.8604	0.7899	0.8637	0.8414	0.9318	0.92	0.9261	0.8075	0.8257	0.7931	0.8535	0.8994	0.9185	0.8453	0.9033	0.8401	0.901	0.9144	0.9356	0.8635	0.9187	0.9446	0.9374	0.9659	0.9165	0.8604	0.9575	0.5223	0.5289	0.9848	0.5961
GO:0016567_protein_ubiquitination	0.0148	0.8215	0.4555	0.7148	0.7455	0.8856	0.8911	0.8976	0.8811	0.7899	0.8619	0.8396	0.7598	0.9081	0.9261	0.8075	0.8384	0.8213	0.8516	0.9049	0.8902	0.9248	0.8985	0.8522	0.8939	0.9142	0.9269	0.8843	0.9159	0.9479	0.9374	0.9504	0.9165	0.9511	0.8566	0.6716	0.6627	0.8849	0.6277
GO:0032446_protein_modification_by_small_protein_conjugation	0.01117	0.8215	0.3946	0.6167	0.7455	0.8864	0.8911	0.8976	0.8796	0.7719	0.8408	0.8313	0.9005	0.9245	0.9203	0.8075	0.8384	0.8113	0.8527	0.9022	0.8902	0.9232	0.8985	0.8575	0.8954	0.9156	0.9333	0.8783	0.9159	0.9452	0.9374	0.9504	0.9165	0.9493	0.9108	0.738	0.7353	0.8462	0.6481
GO:0070647_protein_modification_by_small_protein_conjugation_or_removal	0.004481	0.8215	0.3734	0.6378	0.7633	0.8894	0.8911	0.8976	0.8848	0.7725	0.8045	0.7978	0.9314	0.9279	0.9267	0.8266	0.839	0.8228	0.8526	0.9049	0.9221	0.9373	0.9052	0.8601	0.9043	0.9191	0.9356	0.8838	0.9153	0.948	0.9374	0.9483	0.9291	0.9503	0.9175	0.5922	0.628	0.9848	0.7092
GO:0051649_establishment_of_localization_in_cell	0.000426	0.7264	0.6038	0.7003	0.7836	0.9062	0.8911	0.8976	0.8677	0.8042	0.8715	0.8514	0.9318	0.9226	0.9261	0.842	0.8633	0.8149	0.8721	0.9049	0.9249	0.9416	0.9052	0.8613	0.9073	0.9184	0.9369	0.8806	0.9371	0.9482	0.9429	0.9718	0.9361	0.9605	0.959	0.7662	0.7353	0.9848	0.5483
GO:0051716_cellular_response_to_stimulus	0.000426	0.7747	0.4554	0.1938	0.7207	0.8877	0.8911	0.8976	0.8636	0.6915	0.7962	0.7543	0.9176	0.9094	0.9267	0.8383	0.8384	0.8029	0.8515	0.8695	0.922	0.9269	0.9082	0.8634	0.8995	0.921	0.9159	0.8783	0.905	0.9327	0.9374	0.9457	0.9291	0.9503	0.9585	0.9679	0.9466	0.9848	0.5564
GO:0033554_cellular_response_to_stress	0.04972	0.8215	0.648	0.2376	0.8082	0.9062	0.8911	0.8976	0.8945	0.7802	0.8637	0.7809	0.915	0.9245	0.9267	0.8577	0.8753	0.8098	0.8757	0.9046	0.9365	0.8507	0.9187	0.8757	0.9097	0.9321	0.9369	0.8902	0.9159	0.9482	0.9374	0.9563	0.9367	0.9605	0.9628	0.9755	0.9466	0.9848	0.7582
GO:0006366_transcription_from_RNA_polymerase_II_promoter	0.002951	0.8215	0.4434	0.4829	0.7855	0.8839	0.8604	0.8976	0.7997	0.7853	0.8609	0.7656	0.8815	0.8892	0.9205	0.8324	0.8482	0.8352	0.8647	0.8857	0.9097	0.9212	0.9033	0.8488	0.9093	0.9191	0.9369	0.8984	0.882	0.9446	0.9374	0.9481	0.9278	0.9503	0.949	0.9589	0.9489	0.9848	0.4926
GO:0018107_peptidyl-threonine_phosphorylation	0.0299	0.7376	0.5155	0.6029	0.6873	0.8075	0.7229	0.6976	0.8117	0.8239	0.8637	0.8374	0.821	0.7484	0.7777	0.8546	0.8579	0.8803	0.8721	0.8627	0.8903	0.8673	0.8503	0.8696	0.8511	0.8909	0.9074	0.9119	0.9204	0.9446	0.9163	0.9606	0.9278	0.9487	0.8153	0.9523	0.9323	0.9848	0.6856
GO:0007173_epidermal_growth_factor_receptor_signaling_pathway	0.004975	0.6599	0.3524	0.6183	0.7512	0.8073	0.7032	0.6858	0.8026	0.768	0.8691	0.8191	0.8645	0.8867	0.7354	0.8481	0.8784	0.8595	0.8824	0.866	0.9023	0.9081	0.8865	0.8641	0.8939	0.9191	0.9369	0.9069	0.9138	0.9446	0.9374	0.9645	0.9291	0.9605	0.9142	0.9591	0.959	0.9848	0.2515
GO:0006790_sulfur_metabolic_process	0.007544	0.5708	0.6387	0.7567	0.771	0.8075	0.6142	0.6515	0.8316	0.7899	0.8715	0.8468	0.8488	0.8035	0.6472	0.8494	0.873	0.8439	0.8541	0.8885	0.9023	0.9004	0.8549	0.8522	0.8939	0.897	0.9369	0.8775	0.8918	0.9446	0.9374	0.9483	0.9278	0.9586	0.8815	0.9591	0.9489	0.9848	0.3658
GO:0016571_histone_methylation	0.03286	0.7376	0.6129	0.7664	0.7009	0.75	0.8169	0.7206	0.6799	0.7162	0.794	0.7599	0.8721	0.8685	0.8049	0.8075	0.823	0.8209	0.8392	0.8513	0.8856	0.9081	0.8675	0.838	0.8516	0.8852	0.8849	0.8898	0.8918	0.9209	0.9287	0.9483	0.9165	0.9298	0.8968	0.9514	0.9335	0.9848	0.3011
GO:0060322_head_development	0.04023	0.7264	0.6387	0.8026	0.7876	0.7068	0.7758	0.6021	0.8504	0.8258	0.8579	0.8612	0.9168	0.9031	0.7764	0.8577	0.8655	0.8458	0.8796	0.9049	0.9097	0.9106	0.9082	0.8694	0.8939	0.9148	0.9369	0.9032	0.9159	0.9446	0.9429	0.9701	0.9386	0.957	0.945	0.9591	0.9512	0.9848	0.3084
GO:0060324_face_development	0.04523	0.6943	0.6106	0.8329	0.8074	0.7421	0.8477	0.7386	0.8548	0.8331	0.8654	0.8726	0.9314	0.9194	0.8641	0.8664	0.8707	0.8564	0.8824	0.905	0.919	0.9198	0.92	0.8779	0.9077	0.9191	0.9369	0.913	0.9234	0.9482	0.949	0.9701	0.9434	0.9605	0.9492	0.9628	0.958	0.9848	0.2977
GO:0017156_calcium_ion-dependent_exocytosis	0.03932	0.5654	0.6826	0.552	0.7676	0.8864	0.7574	0.8607	0.8299	0.7639	0.833	0.8191	0.8829	0.8811	0.8894	0.8283	0.8617	0.8512	0.8508	0.8857	0.9167	0.9364	0.8983	0.8399	0.8857	0.9045	0.9159	0.8918	0.9204	0.9446	0.9358	0.9483	0.9019	0.9443	0.936	0.9591	0.7372	0.7976	0.2635
GO:0010970_microtubule-based_transport	0.009515	0.5941	0.7254	0.6953	0.7943	0.8643	0.8353	0.8787	0.8468	0.8009	0.849	0.8478	0.8563	0.8617	0.9203	0.8096	0.8273	0.8471	0.8552	0.8725	0.8882	0.8811	0.8779	0.8501	0.8793	0.8852	0.9307	0.8806	0.9159	0.9292	0.9343	0.9647	0.93	0.9298	0.9322	0.9591	0.9575	0.9848	0.4449
GO:0008088_axon_cargo_transport	0.01362	0.6008	0.827	0.6953	0.7788	0.8533	0.8053	0.8733	0.8281	0.767	0.844	0.8191	0.8651	0.8716	0.9161	0.814	0.823	0.8458	0.8531	0.8685	0.8959	0.9064	0.8786	0.8501	0.8739	0.8852	0.9269	0.8838	0.9159	0.9315	0.9343	0.9647	0.93	0.933	0.936	0.9591	0.9575	0.9848	0.5109
GO:0032774_RNA_biosynthetic_process	0.004012	0.8215	0.6103	0.6421	0.8135	0.8296	0.8304	0.8958	0.8137	0.8197	0.8637	0.8056	0.8433	0.8097	0.9161	0.8481	0.8633	0.8471	0.8597	0.8725	0.9023	0.9064	0.8957	0.8613	0.8937	0.9156	0.9369	0.8944	0.8833	0.9315	0.9343	0.9457	0.9165	0.9298	0.9156	0.9356	0.9482	0.9848	0.5586
GO:0006351_transcription,_DNA-dependent	0.004975	0.8215	0.6508	0.7083	0.8222	0.8414	0.8233	0.8916	0.816	0.8239	0.8691	0.8191	0.841	0.8129	0.9161	0.8494	0.8692	0.8512	0.8647	0.8725	0.9023	0.907	0.8957	0.8613	0.8939	0.9156	0.9369	0.8963	0.885	0.934	0.9343	0.9481	0.917	0.9298	0.9142	0.9514	0.9489	0.9848	0.5813
GO:0000079_regulation_of_cyclin-dependent_protein_kinase_activity	0.04745	0.7158	0.6387	0.727	0.8137	0.9062	0.8841	0.8976	0.8796	0.7939	0.865	0.8191	0.9148	0.9184	0.9267	0.8379	0.817	0.8237	0.861	0.8885	0.9023	0.9212	0.8919	0.8432	0.8862	0.9156	0.9369	0.8974	0.9159	0.9468	0.9374	0.9504	0.9291	0.9487	0.9583	0.9628	0.957	0.9848	0.6965
GO:0043550_regulation_of_lipid_kinase_activity	0.001637	0.6591	0.6387	0.7797	0.7671	0.8672	0.8223	0.8849	0.8299	0.8324	0.8804	0.8325	0.8829	0.9144	0.9238	0.8836	0.8926	0.8662	0.9102	0.9049	0.9241	0.8979	0.9033	0.8902	0.9192	0.9422	0.9369	0.9121	0.8986	0.9537	0.939	0.9728	0.9367	0.9684	0.9492	0.9679	0.958	0.9848	0.3419
GO:0032869_cellular_response_to_insulin_stimulus	0.001112	0.7158	0.4505	0.7448	0.7113	0.8353	0.8477	0.8912	0.8732	0.7493	0.8251	0.849	0.9084	0.9031	0.9203	0.8481	0.8541	0.8458	0.8655	0.8968	0.919	0.9254	0.8957	0.8663	0.9079	0.9196	0.9301	0.9075	0.9204	0.9446	0.9374	0.9483	0.9291	0.9605	0.9221	0.9628	0.9482	0.9848	0.4059
GO:0046777_protein_amino_acid_autophosphorylation	0.0169	0.6735	0.3734	0.7545	0.7482	0.8839	0.8283	0.8622	0.871	0.8167	0.8715	0.8394	0.9168	0.9135	0.9014	0.8779	0.8865	0.8937	0.8757	0.914	0.932	0.9364	0.9078	0.9004	0.9073	0.9191	0.9369	0.9235	0.9234	0.95	0.939	0.9661	0.9496	0.9605	0.9492	0.9681	0.9736	0.9848	0.6072
GO:0032868_response_to_insulin_stimulus	0.0004017	0.7238	0.4203	0.7924	0.6793	0.8905	0.8911	0.8976	0.897	0.8324	0.8905	0.8824	0.9321	0.9279	0.9267	0.8841	0.899	0.8978	0.8875	0.9231	0.9483	0.9525	0.9257	0.9051	0.9284	0.9402	0.9477	0.9341	0.9508	0.9537	0.9585	0.9717	0.9533	0.9767	0.9583	0.9755	0.9736	0.9848	0.5781
GO:0030510_regulation_of_BMP_signaling_pathway	0.0001357	0.7829	0.5009	0.7052	0.6713	0.8877	0.8772	0.8607	0.8915	0.7933	0.8772	0.8394	0.9321	0.9206	0.7947	0.8649	0.8919	0.8805	0.8824	0.9158	0.9447	0.9598	0.9208	0.893	0.9256	0.935	0.9441	0.9152	0.9468	0.95	0.9483	0.9647	0.9459	0.9748	0.949	0.9755	0.958	0.9848	0.5407
GO:0018105_peptidyl-serine_phosphorylation	0.01275	0.8215	0.4015	0.7924	0.8351	0.9062	0.8911	0.8976	0.8915	0.8528	0.8951	0.8793	0.9321	0.9279	0.9267	0.8878	0.8865	0.8926	0.8963	0.9146	0.9479	0.9416	0.934	0.9169	0.9324	0.9444	0.9588	0.9341	0.9334	0.9602	0.9603	0.9677	0.9552	0.9681	0.9607	0.9755	0.9621	0.9848	0.6719
GO:0032582_negative_regulation_of_gene-specific_transcription	0.0004891	0.5622	0.2592	0.7098	0.8151	0.8865	0.8911	0.8572	0.881	0.8324	0.8761	0.8642	0.9321	0.9279	0.9265	0.8704	0.8862	0.8805	0.9033	0.9049	0.9359	0.95	0.9187	0.893	0.9284	0.9444	0.9477	0.9323	0.9316	0.9537	0.9508	0.9701	0.9441	0.9748	0.9559	0.9748	0.963	0.9848	0.189
GO:0008286_insulin_receptor_signaling_pathway	0.0008673	0.5736	0.3244	0.762	0.8076	0.8682	0.8633	0.8776	0.881	0.8184	0.8698	0.8826	0.9314	0.9245	0.9074	0.8739	0.8877	0.8805	0.8905	0.905	0.9369	0.9402	0.9052	0.893	0.9284	0.9438	0.9381	0.9213	0.9355	0.9482	0.9542	0.9701	0.9461	0.9767	0.9492	0.9755	0.958	0.9848	0.244
GO:0010553_negative_regulation_of_gene-specific_transcription_from_RNA_polymerase_II_promoter	0.0004017	0.6671	0.269	0.7793	0.8413	0.9062	0.8911	0.8849	0.9004	0.8678	0.9012	0.8946	0.9321	0.934	0.9267	0.8902	0.9023	0.9029	0.9226	0.9181	0.9529	0.9578	0.935	0.9181	0.9451	0.9547	0.9588	0.9423	0.9431	0.9702	0.9658	0.9783	0.9616	0.9767	0.9606	0.9755	0.9736	0.9848	0.2726
GO:0030514_negative_regulation_of_BMP_signaling_pathway	0.002546	0.7629	0.6673	0.8049	0.5089	0.8864	0.8911	0.8849	0.8915	0.8218	0.8813	0.8612	0.9321	0.9237	0.8861	0.8682	0.8983	0.8882	0.8835	0.9158	0.9483	0.9576	0.9195	0.893	0.9284	0.9374	0.9415	0.9155	0.9508	0.9519	0.9461	0.9701	0.9449	0.9765	0.9518	0.9755	0.958	0.9848	0.537
GO:0007183_SMAD_protein_complex_assembly	0.01438	0.8215	0.6673	0.6837	0.5477	0.9062	0.8911	0.8976	0.901	0.8667	0.9167	0.8742	0.9321	0.934	0.9261	0.8967	0.9206	0.91	0.9226	0.9297	0.9557	0.9582	0.935	0.9181	0.9457	0.9547	0.9588	0.9423	0.9357	0.9718	0.9687	0.9783	0.9686	0.9767	0.9628	0.9755	0.9736	0.9848	0.7162
GO:0006350_transcription	0.006767	0.8215	0.7778	0.7934	0.7986	0.8856	0.8827	0.8916	0.881	0.8769	0.9012	0.8799	0.9101	0.8918	0.9203	0.8788	0.901	0.8937	0.8975	0.9115	0.9249	0.9391	0.9082	0.893	0.9214	0.9378	0.9477	0.9212	0.9159	0.9487	0.939	0.9647	0.9393	0.9605	0.9322	0.9591	0.963	0.9848	0.6397
GO:0007017_microtubule-based_process	0.0148	0.8215	0.7471	0.8839	0.8448	0.9062	0.8911	0.8976	0.9009	0.8809	0.9012	0.8799	0.9321	0.934	0.9267	0.8846	0.9002	0.8978	0.8849	0.9231	0.9514	0.9525	0.9262	0.8984	0.9337	0.9444	0.9469	0.9213	0.9434	0.95	0.9545	0.9701	0.952	0.9636	0.9606	0.965	0.9607	0.9848	0.6812
GO:0043030_regulation_of_macrophage_activation	0.7747	0.7833	0.6352	0.6829	0.02061	0.5418	0.4686	0.5663	0.8368	0.8239	0.794	0.849	0.7301	0.6764	0.6532	0.7774	0.8139	0.7915	0.8392	0.8585	0.8682	0.7686	0.8063	0.8041	0.8682	0.8239	0.8878	0.8407	0.8705	0.9247	0.9163	0.9483	0.9029	0.9445	0.8755	0.9514	0.9446	0.9848	0.02011
GO:0015914_phospholipid_transport	0.5509	0.6336	0.7357	0.7577	0.04858	0.8414	0.2563	0.5016	0.8407	0.7475	0.826	0.7599	0.6845	0.8804	0.7354	0.8075	0.8367	0.8081	0.8541	0.8616	0.8955	0.9004	0.8207	0.8193	0.8857	0.9052	0.9015	0.8635	0.8969	0.9446	0.9374	0.9607	0.9165	0.9298	0.8968	0.9514	0.9482	0.9848	0.1122
GO:0009991_response_to_extracellular_stimulus	0.5912	0.5995	0.6952	0.5694	0.01124	0.7573	0.4006	0.6742	0.8376	0.8398	0.8715	0.883	0.7754	0.8454	0.6569	0.8621	0.8947	0.8805	0.9019	0.9049	0.9169	0.9359	0.8985	0.8753	0.8939	0.9196	0.9369	0.9154	0.9435	0.95	0.9379	0.986	0.9496	0.9625	0.9271	0.9628	0.9736	0.9848	0.06117
GO:0050764_regulation_of_phagocytosis	0.7366	0.3401	0.8576	0.6627	0.0191	0.8146	0.6651	0.816	0.8174	0.8069	0.797	0.8595	0.6906	0.8438	0.7858	0.7972	0.8045	0.7915	0.8392	0.8623	0.8682	0.8895	0.8391	0.7892	0.8483	0.8525	0.8895	0.8422	0.885	0.908	0.9163	0.9483	0.9164	0.9298	0.9253	0.9514	0.9466	0.9848	0.4829
GO:0035051_cardiac_cell_differentiation	0.4425	0.5077	0.7644	0.7252	0.04345	0.6384	0.8392	0.6516	0.8448	0.7276	0.794	0.7809	0.8743	0.7764	0.7677	0.8075	0.8215	0.7931	0.8392	0.8616	0.8748	0.9004	0.8723	0.8147	0.8857	0.8852	0.9333	0.85	0.905	0.9315	0.9343	0.9457	0.9164	0.9493	0.9142	0.953	0.9446	0.9848	0.2142
GO:0031069_hair_follicle_morphogenesis	0.3418	0.4815	0.7489	0.8131	0.01124	0.8276	0.8235	0.8778	0.8936	0.8069	0.8692	0.849	0.9314	0.9135	0.9265	0.8369	0.8482	0.8512	0.8824	0.9049	0.9206	0.9112	0.9037	0.8753	0.9071	0.9196	0.9356	0.9079	0.936	0.9482	0.939	0.9701	0.9413	0.9636	0.9492	0.9692	0.958	0.9848	0.196
GO:0009075_histidine_family_amino_acid_metabolic_process	0.7353	0.03	0.8824	0.8531	0.8015	0.886	0.7652	0.7442	0.8797	0.8768	0.8963	0.8959	0.903	0.9135	0.4547	0.8366	0.8937	0.8736	0.8835	0.9098	0.9308	0.9391	0.8825	0.4307	0.9077	0.9191	0.9346	0.9054	0.9159	0.9482	0.9374	0.9785	0.9393	0.9636	0.945	0.9693	0.9607	0.9848	0.5201
GO:0006547_histidine_metabolic_process	0.7353	0.03	0.8824	0.8531	0.8015	0.886	0.7652	0.7442	0.8797	0.8768	0.8963	0.8959	0.903	0.9135	0.4547	0.8366	0.8937	0.8736	0.8835	0.9098	0.9308	0.9391	0.8825	0.4307	0.9077	0.9191	0.9346	0.9054	0.9159	0.9482	0.9374	0.9785	0.9393	0.9636	0.945	0.9693	0.9607	0.9848	0.5201
GO:0009077_histidine_family_amino_acid_catabolic_process	0.6771	0.0364	0.8895	0.8303	0.7994	0.8765	0.8213	0.8498	0.8677	0.8667	0.8887	0.8712	0.9116	0.91	0.7614	0.8494	0.8926	0.8662	0.8825	0.906	0.931	0.9198	0.8798	0.5755	0.9043	0.9191	0.9307	0.8768	0.9234	0.9482	0.9374	0.9729	0.9367	0.9636	0.9492	0.9692	0.9568	0.9848	0.3165
GO:0006548_histidine_catabolic_process	0.6771	0.0364	0.8895	0.8303	0.7994	0.8765	0.8213	0.8498	0.8677	0.8667	0.8887	0.8712	0.9116	0.91	0.7614	0.8494	0.8926	0.8662	0.8825	0.906	0.931	0.9198	0.8798	0.5755	0.9043	0.9191	0.9307	0.8768	0.9234	0.9482	0.9374	0.9729	0.9367	0.9636	0.9492	0.9692	0.9568	0.9848	0.3165
