# Supplementary material for: Comprehensive Identification and Annotation of Cell Type-Specific and Ubiquitous CTCF-Binding Sites in the Human Genome
Source: PLoS One. 2012 Jul 19;7(7):e41374. doi: 10.1371/journal.pone.0041374 (PMC3400636; doi:10.1371/journal.pone.0041374)
Supplement: Table S10 — Correlations between CTCF-binding sites and chromatin features. (XLSX) [file pone.0041374.s028.xlsx]

## Sheet: Table S10
	Table S10. Scatter correlation between CTCF and chromatin features
	Chromatin features		total		unique		common		ubiquitous
			correlation	p-value	correlation	p-value	correlation	p-value	correlation	p-value
	Nucleosome Positioning	GM12878	-0.86201	1.12159e-30	0.173913	0.083545	-0.0716503	0.478693	-0.837424	1.85542e-27
		K562	-0.849557	5.64876e-29	0.717055	4.82479e-17	-0.731109	5.81639e-18	-0.751585	2.07858e-19
	Open chromatin in K562 cell	FAIRE	0.765234	1.87433e-20	0.78619	3.33309e-22	0.50161	1.05918e-07	0.880277	1.68616e-33
		DNaseI	0.591202	9.42342e-11	0.543198	5.24516e-09	0.286718	0.00382656	0.918994	2.13279e-41
		DGF	0.75713	7.97174e-20	0.554537	2.14894e-09	0.402444	3.31365e-05	0.925209	4.96796e-43
	Histone modifications in K562 cell	Pol2	0.515246	4.13174e-08	0.570154	5.94446e-10	0.31494	0.0014157	0.919293	1.79243e-41
		H4k20me1	0.954438	2.86082e-53	0.729067	7.97463e-18	0.89523	3.54166e-36	0.913338	5.07118e-40
		H3k9me3	0.696406	8.88178e-16	0.730391	6.5016e-18	0.800096	1.77568e-23	0.637602	9.79106e-13
		H3k9me1	0.899691	4.69026e-37	0.734796	3.26581e-18	0.863568	6.68655e-31	0.891931	1.49107e-35
		H3k9ac	-0.0729824	0.470534	0.264066	0.00793658	-0.0914819	0.36535	0.861793	1.20481e-30
		H3k79me2	-0.346908	0.000406329	0.285126	0.00403575	-0.295949	0.00279379	0.406688	2.6842e-05
		H3k4me3	0.418105	1.50139e-05	0.379357	9.92487e-05	0.28526	0.00401774	0.914156	3.25089e-40
		H3k4me2	-0.101134	0.316732	0.285728	0.00395553	-0.0359612	0.722436	0.860706	1.72072e-30
		H3k4me1	0.729023	8.02844e-18	0.575062	3.91429e-10	0.69956	5.55112e-16	0.946975	4.04153e-50
		H3k36me3	0.593882	7.38203e-11	0.581851	2.17091e-10	0.435561	5.9231e-06	0.703768	3.33067e-16
		H3k27me3	0.204961	0.0407948	0.683677	4.55191e-15	0.690989	1.77636e-15	0.38632	7.19027e-05
		H3k27ac	-0.31575	0.00137389	0.339284	0.000553955	-0.228021	0.022508	0.737536	2.11356e-18
		H2az	0.918823	2.35608e-41	0.582643	2.02481e-10	0.745351	5.92753e-19	0.935406	4.84094e-46
	DNA methylation	AG04449	-0.585284	1.60296e-10	-0.124596	0.216789	-0.408724	2.42374e-05	-0.643088	5.419e-13
		HCPE	-0.599535	4.37866e-11	-0.0583347	0.564275	-0.253205	0.0110289	-0.404437	3.00253e-05
		HEK293	-0.758955	5.78265e-20	-0.0189433	0.851607	-0.471924	7.17489e-07	-0.244726	0.0141306
		HepG2	-0.729848	7.0706e-18	-0.167204	0.0963638	-0.316233	0.00134945	-0.266296	0.00740588
		HMEC	-0.622609	4.65217e-12	0.137129	0.173677	-0.381034	9.1895e-05	-0.59585	6.16205e-11
		K562	-0.668787	2.86438e-14	-0.189003	0.0596631	-0.450866	2.50903e-06	-0.340269	0.00053246
		SAEC	-0.661242	7.00551e-14	-0.0226844	0.822741	-0.460267	1.44968e-06	-0.533046	1.13433e-08
		SKNSH	-0.609507	1.69887e-11	0.0805026	0.425917	-0.378275	0.000104278	-0.602865	3.20354e-11
