# Supplementary material for: Comprehensive Identification and Annotation of Cell Type-Specific and Ubiquitous CTCF-Binding Sites in the Human Genome
Source: PLoS One. 2012 Jul 19;7(7):e41374. doi: 10.1371/journal.pone.0041374 (PMC3400636; doi:10.1371/journal.pone.0041374)
Supplement: Table S12 — Identification and characterization of barrier CTCF-binding sites. (A) At a scale of 16 kb, barrier CTCF-binding sites were defined as the CTCF-binding sites located within 16 kb immediately upstream and downstream of the domain boundaries. (B) At a scale of 8 kb, barrier CTCF-binding sites were defined as the CTCF-binding sites located within 8 kb immediately upstream and downstream of the domain boundaries. (XLSX) [file pone.0041374.s030.xlsx]

## Sheet: Table S12A
Table S12A. Identification and characterization of chromatin domains identified by HMMSeg at scale 16 kb
				euchromatin domain										hetrochromatin domain
	number	coverage		length (bp)							number	coverage		length (bp)
		bp	percent	minimum	5 percentile	25 percentile	median	75 percentile	95 percentile	maximum		bp	percent	minimum	5 percentile	25 percentile	median	75 percentile	95 percentile	maximum
GM12878	15624	838592000	27.6188	3000	9000	19000	29000	60000	172300	3457000	15634	2197723000	72.3815	1000	5000	15000	36000	100000	556000	20966000
HMEC	20556	893054000	29.4125	2000	9000	19000	27000	49000	135000	3448000	20578	2143261000	70.5878	1000	6000	16000	34000	86000	368600	20967000
HUVEC	20176	860200000	28.3305	3000	8000	19000	28000	49000	131000	801000	20195	2176115000	71.6699	1000	4000	14000	31000	84000	400750	20967000
K562	14166	837700000	27.5895	3000	9000	20000	31000	62000	199000	2979000	14181	2198615000	72.4109	1000	5000	13000	27000	85000	693450	20966000
NHEK	20564	923687000	30.4214	3000	8000	18000	28000	51000	143000	3452000	20583	2112628000	69.5789	1000	5000	14000	32000	81000	367000	20967000
Average	18217.2	870646600	28.6746	2800	8600	19000	28600	54200	156060	2827400	18234.2	2165668400	71.3258	1000	5000	14400	32000	87200	477160	20966600

## Sheet: Table S12B
Table S12B. Identification and characterization of chromatin domains identified by HMMSeg at scale 8 kb
	euchromatin domain										hetrochromatin domain
	number	coverage		length (bp)							number	coverage		length (bp)
		bp	percent	minimum	5 percentile	25 percentile	median	75 percentile	95 percentile	maximum		bp	percent	minimum	5 percentile	25 percentile	median	75 percentile	95 percentile	maximum
GM12878	27983	657022000	21.6389	2000	5000	9000	14000	25000	77000	486000	27999	2379293000	78.3615	1000	3000	9000	21000	59000	308550	21008000
HMEC	37544	731318000	24.0858	2000	4000	9000	13000	21000	59000	518000	37566	2304997000	75.9146	1000	2000	8000	20000	50000	212000	21009000
HUVEC	36079	715450000	23.5632	2000	4000	9000	14000	22000	59000	420000	36098	2320865000	76.4372	1000	2000	7000	17000	48000	225000	21008000
K562	27404	683613000	22.5146	2000	4700	9000	14000	26000	81000	2040000	27423	2352702000	77.4857	1000	3000	7000	15000	43000	307000	21008000
NHEK	37618	768737000	25.3182	2000	4000	9000	13000	22000	62000	431000	37639	2267578000	74.6822	1000	2000	7000	18000	47000	210000	21009000
Average	33325.6	711228000	23.4241	2000	4340	9000	13600	23200	67600	779000	33345	2325087000	76.5762	1000	2400	7600	18200	49400	252510	21008400
