# Supplementary material for: Comprehensive Identification and Annotation of Cell Type-Specific and Ubiquitous CTCF-Binding Sites in the Human Genome
Source: PLoS One. 2012 Jul 19;7(7):e41374. doi: 10.1371/journal.pone.0041374 (PMC3400636; doi:10.1371/journal.pone.0041374)
Supplement: Table S13 — Identification and characterization of replication time zones. (XLSX) [file pone.0041374.s031.xlsx]

## Sheet: Table S13
Table S13. Identification and characterization of replication time zones
	K562			GM06990			BJ
	Early	Middle	Late	Early	Middle	Late	Early	Middle	Late
count	2845	2899	2234	1602	1861	1781	1849	3747	1700
coverage (Mb)	1199.43	1607.56	1332.97	1373.65	1960.42	1408.86	1391.82	1742.56	1205.97
length (Kb)	421±996	554±2217	596±1245	857±1355	1053±1672	791±1366	752±1150	465±1567	709±1167
